# Supplementary material for: Use of Graph Theory to Characterize Human and Arthropod Vector Cell Protein Response to Infection With Anaplasma phagocytophilum
Source: Front Cell Infect Microbiol. 2018 Aug 3;8:265. doi: 10.3389/fcimb.2018.00265 (PMC6086010; doi:10.3389/fcimb.2018.00265)
Supplement: Supplementary file 3 [file Data_Sheet_1.XLSX]

## Sheet: Tick cell proteomics
Supplementary Dataset 1. Results of tick cell proteomics analysis.
Accession	Description	Specie	AAs	MW [kDa]	calc. pI	Σ Proteins	Σ Unique Peptides	Σ Peptides	Σ PSMs	Score Control 1	Coverage Control 1	Peptides Control 1	PSM Control 1	Score Control 2	Coverage Control 2	Peptides Control 2	PSM Control 2	Score Control 3	Coverage Control 3	Peptides Control 3	PSM Control 3	Score Infected 1	Coverage Infected 1	Peptides Infected 1	PSM Infected 1	Score Infected 2	Coverage Infected 2	Peptides Infected 2	PSM Infected 2	Score Infected 3	Coverage Infected 3	Peptides Infected 3	PSM Infected 3	Average PSMs Control	Average PSMs Infected	Fold Change (Infected/control)	log2(fold_change)	p-value (Chi2)	GOs
B7QBM2	Dipeptidyl peptidase III, putative (Fragment)	Ixodes scapularis GN	744	83.7948	5.69385	1	21	30	61	4.6258	5.78	4	4	0	2.02	1	1	5.05663	9.41	5	5	12.7095	24.19	13	13	8.1357	8.74	5	5	20.2874	20.43	11	13	3.33333	10.3333	3.1	1.63227	0.049461	C:cytoplasm; F:dipeptidyl-peptidase activity; P:proteolysis
L7MAH2	Putative vesicle coat complex copi beta' subunit	Rhipicephalus pulchellus PE	521	58.2446	7.37158	2	6	11	16	1.88928	13.24	7	8	0	0	0	0	1.93621	6.53	3	3	0	0	0	0	0	0	0	0	0	0	0	0	3.66667	0	0	#NUM!	0.046883	-
A0A023FDJ4	Putative hydroxysteroid dehydrogenase-like protein 2 (Fragment)	Amblyomma cajennense PE	498	53.5563	8.70459	1	1	12	18	0	12.25	4	4	0	12.05	4	4	0	10.64	4	4	0	0	0	0	0	0	0	0	0	0	0	0	4	0	0	#NUM!	0.046883	F:oxidoreductase activity; P:oxidation-reduction process
A0A023FEH3	6-phosphogluconate dehydrogenase, decarboxylating (Fragment)	Amblyomma cajennense PE	401	43.2521	7.66455	1	1	8	12	0	0	0	0	4.076	16.46	6	7	1.67657	8.48	3	4	0	4.74	1	1	0	0	0	0	0	0	0	0	3.66667	0.333333	0.0909091	-3.45943	0.046883	F:phosphogluconate dehydrogenase (decarboxylating) activity; F:NADP binding; P:pentose-phosphate shunt; P:oxidation-reduction process
A0A023FL89	Putative methionyl-trna synthetase cytoplasmic (Fragment)	Amblyomma cajennense PE	834	94.8332	7.00537	1	3	13	15	0	0	0	0	0	10.79	5	5	0	10.55	5	6	0	3.24	1	1	0	0	0	0	0	0	0	0	3.66667	0.333333	0.0909091	-3.45943	0.046883	C:cytoplasm; F:methionine-tRNA ligase activity; F:ATP binding; P:methionyl-tRNA aminoacylation
A0A023FN11	Uncharacterized protein	Amblyomma cajennense PE	455	50.685	7.48877	4	5	11	18	0	6.81	3	3	2.87324	3.08	1	1	0	23.3	7	7	0	0	0	0	0	0	0	0	0	0	0	0	3.66667	0	0	#NUM!	0.046883	-
A0A023FN51	Putative tick kunitz 1 (Fragment)	Amblyomma cajennense PE	335	37.9292	8.07471	1	3	12	15	0	23.58	5	7	0	0	0	0	0	16.42	5	5	0	0	0	0	0	0	0	0	0	0	0	0	4	0	0	#NUM!	0.046883	F:serine-type endopeptidase inhibitor activity; P:negative regulation of endopeptidase activity
A0A023FQ64	Putative tick kunitz 1	Amblyomma cajennense PE	147	16.7082	8.90967	1	1	7	11	0	36.05	3	4	0	0	0	0	0	57.82	6	7	0	0	0	0	0	0	0	0	0	0	0	0	3.66667	0	0	#NUM!	0.046883	F:serine-type endopeptidase inhibitor activity; P:negative regulation of endopeptidase activity
A0A023FUU9	Putative tick metalloprotease 1	Amblyomma cajennense PE	547	61.1904	7.15186	1	2	14	15	0	4.94	1	1	0	23.22	7	8	1.67998	3.29	2	2	0	0	0	0	0	0	0	0	0	0	0	0	3.66667	0	0	#NUM!	0.046883	F:metalloendopeptidase activity; P:proteolysis
A0A023FX25	Uncharacterized protein (Fragment)	Amblyomma parvum PE	373	41.7533	7.95752	1	3	8	11	2.37694	9.12	4	4	2.26925	7.51	3	3	0	9.65	4	4	0	0	0	0	0	0	0	0	0	0	0	0	3.66667	0	0	#NUM!	0.046883	-
A0A023FX80	Putative conserved protein with signal anchor (Fragment)	Amblyomma parvum PE	276	30.7432	7.00537	1	2	4	11	0	6.88	2	3	1.72666	11.96	3	4	0	11.96	3	4	0	0	0	0	0	0	0	0	0	0	0	0	3.66667	0	0	#NUM!	0.046883	F:strictosidine synthase activity; P:biosynthetic process
A0A023FY24	Putative dystrophin-like protein (Fragment)	Amblyomma parvum PE	736	83.5828	6.32861	1	1	10	17	1.98207	1.36	1	1	1.98416	7.34	4	5	0	9.1	4	5	1.89993	1.36	1	1	0	0	0	0	0	0	0	0	3.66667	0.333333	0.0909091	-3.45943	0.046883	F:zinc ion binding
A0A023FZG5	Putative tick metalloprotease 73 (Fragment)	Amblyomma parvum PE	255	28.2886	8.41162	1	1	12	14	0	29.8	5	5	0	4.31	1	1	0	20.78	4	5	0	0	0	0	0	0	0	0	0	0	0	0	3.66667	0	0	#NUM!	0.046883	F:metalloendopeptidase activity; P:proteolysis
A0A023FZH9	Putative hexokinase (Fragment)	Amblyomma parvum PE	434	48.8797	7.56201	1	3	10	13	1.71564	7.37	3	4	0	4.38	1	1	0	25.81	7	8	0	0	0	0	0	0	0	0	0	0	0	0	4.33333	0	0	#NUM!	0.046883	C:cell; F:hexokinase activity; F:ATP binding; F:glucose binding; P:cellular glucose homeostasis; P:glycolytic process; P:carbohydrate phosphorylation
A0A023G517	Uncharacterized protein	Amblyomma triste PE	392	41.875	11.1655	2	2	10	21	0	0	0	0	1.63996	11.48	4	5	0	26.53	6	8	0	0	0	0	0	0	0	0	0	0	0	0	4.33333	0	0	#NUM!	0.046883	-
A0A023G870	Putative nucleolar protein	Amblyomma triste PE	597	67.4768	6.94678	3	7	10	13	3.74593	7.2	5	5	0	0	0	0	1.70006	6.03	5	6	0	0	0	0	0	0	0	0	0	0	0	0	3.66667	0	0	#NUM!	0.046883	P:ribosome biogenesis
A0A023GAJ2	Putative tick metalloprotease 72 (Fragment)	Amblyomma triste PE	242	27.0753	7.47412	1	3	12	15	2.00387	17.36	4	5	0	0	0	0	2.08949	28.1	6	6	0	0	0	0	0	5.37	1	1	0	0	0	0	3.66667	0.333333	0.0909091	-3.45943	0.046883	F:metalloendopeptidase activity; P:proteolysis
A0A023GAX3	Putative ubiquitin protein (Fragment)	Amblyomma triste PE	207	23.613	8.33838	1	4	10	13	0	14.49	1	1	4.13342	36.71	5	5	3.47974	20.29	6	7	0	0	0	0	0	0	0	0	0	0	0	0	4.33333	0	0	#NUM!	0.046883	F:ligase activity; P:metabolic process
A0A023GFH0	Putative dna damage-binding protein (Fragment)	Amblyomma triste PE	311	34.7074	7.92822	1	1	8	12	0	0	0	0	0	9.32	3	4	0	27.65	6	8	0	0	0	0	0	0	0	0	0	0	0	0	4	0	0	#NUM!	0.046883	-
A0A023GGQ0	Putative aspartyl beta-hydroxylase	Amblyomma triste PE	246	27.9283	7.54736	1	2	9	13	1.60182	13.41	3	3	0	22.76	5	5	0	13.82	3	3	0	0	0	0	0	0	0	0	0	0	0	0	3.66667	0	0	#NUM!	0.046883	P:peptidyl-amino acid modification
A0A023GK72	Putative mitogen-activated protein kinase organizer 1 (Fragment)	Amblyomma triste PE	246	26.8023	8.5874	2	5	13	18	1.80797	23.98	5	5	0	0	0	0	2.00349	46.75	7	8	0	0	0	0	0	0	0	0	0	0	0	0	4.33333	0	0	#NUM!	0.046883	F:kinase activity; P:phosphorylation
B7P1E8	Putative uncharacterized protein	Ixodes scapularis GN	311	34.6111	5.32568	1	4	7	23	1.63415	24.12	5	8	2.28763	15.11	3	5	0	0	0	0	0	0	0	0	0	0	0	0	0	0	0	0	4.33333	0	0	#NUM!	0.046883	F:N-acetyltransferase activity; P:metabolic process
B7P4V8	Putative uncharacterized protein	Ixodes scapularis GN	138	15.4289	10.1694	1	1	6	12	0	27.54	3	4	0	31.16	4	5	1.66609	23.19	3	3	0	0	0	0	0	0	0	0	0	0	0	0	4	0	0	#NUM!	0.046883	-
B7P6A4	UDP-glucose dehydrogenase, putative (Fragment)	Ixodes scapularis GN	437	48.5737	6.45557	1	3	10	18	2.04058	17.85	6	9	0	0	0	0	0	6.18	2	2	0	0	0	0	0	0	0	0	0	0	0	0	3.66667	0	0	#NUM!	0.046883	F:UDP-glucose 6-dehydrogenase activity; F:NAD binding; P:polysaccharide biosynthetic process; P:oxidation-reduction process
B7P868	Zinc finger protein, putative (Fragment)	Ixodes scapularis GN	264	30.8942	9.67139	1	5	13	13	0	15.15	3	3	1.80761	18.56	5	5	1.61793	26.52	5	5	0	0	0	0	0	0	0	0	0	0	0	0	4.33333	0	0	#NUM!	0.046883	F:nucleic acid binding; F:metal ion binding
B7P950	DNA-binding protein, putative	Ixodes scapularis GN	207	24.1117	6.44287	1	6	11	21	6.8408	11.59	3	3	13.8066	21.74	5	5	6.47395	28.99	5	5	2.61021	6.28	1	1	0	0	0	0	0	0	0	0	4.33333	0.333333	0.0769231	-3.70044	0.046883	C:nucleus; F:DNA binding; F:2-alkenal reductase [NAD(P)] activity; P:oxidation-reduction process
B7PCJ7	Glycerol kinase, putative	Ixodes scapularis GN	114	12.2693	4.84326	1	3	4	16	0	23.68	2	4	0	37.72	3	4	0	23.68	2	3	0	0	0	0	0	0	0	0	0	10.53	1	1	3.66667	0.333333	0.0909091	-3.45943	0.046883	F:glycerol kinase activity; P:carbohydrate metabolic process; P:phosphorylation
B7PGP8	Replication factor C, subunit RFC3, putative	Ixodes scapularis GN	353	39.3497	9.29053	1	4	14	15	0	4.82	1	1	1.69426	37.68	7	7	0	20.11	5	5	0	0	0	0	0	0	0	0	0	0	0	0	4.33333	0	0	#NUM!	0.046883	F:DNA binding; F:DNA-directed DNA polymerase activity; P:DNA replication; P:DNA biosynthetic process
B7PIE9	Putative uncharacterized protein	Ixodes scapularis GN	178	20.0797	9.72998	1	2	10	16	1.60146	24.72	3	5	0	11.8	1	1	0	25.84	4	6	0	0	0	0	0	12.92	1	1	0	0	0	0	4	0.333333	0.0833333	-3.58496	0.046883	-
B7PNX6	Proteasome subunit beta type	Ixodes scapularis GN	279	30.9032	6.90283	1	1	10	16	3.32034	17.92	4	4	2.01714	26.16	5	5	0	8.6	1	4	0	0	0	0	0	0	0	0	0	0	0	0	4.33333	0	0	#NUM!	0.046883	C:nucleus; C:cytoplasm; C:proteasome core complex; F:threonine-type endopeptidase activity; P:proteolysis involved in cellular protein catabolic process
B7PU15	Acetylcholinesterase/butyrylcholinesterase, putative	Ixodes scapularis GN	494	55.5063	8.66064	1	3	10	14	0	8.3	2	2	0	13.97	5	5	0	12.75	5	6	0	0	0	0	0	0	0	0	0	2.43	1	1	4.33333	0.333333	0.0769231	-3.70044	0.046883	F:acetylcholinesterase activity; P:metabolic process
B7PXW4	Dihydroorotate dehydrogenase, putative (Fragment)	Ixodes scapularis GN	375	40.2791	9.12939	1	2	8	16	0	8.8	2	3	1.79785	16	4	4	0	15.47	4	4	0	0	0	0	0	0	0	0	2.32184	3.47	1	1	3.66667	0.333333	0.0909091	-3.45943	0.046883	C:mitochondrial inner membrane; F:dihydroorotate dehydrogenase activity; P:'de novo' pyrimidine nucleobase biosynthetic process; P:'de novo' UMP biosynthetic process; P:oxidation-reduction process
B7Q054	Lysophosphatidic acid acyltransferase endophilin, putative	Ixodes scapularis GN	350	39.1408	5.23682	1	2	11	18	2.21537	18.86	5	5	1.91658	10.29	4	4	2.18784	4.57	2	2	0	0	0	0	0	0	0	0	0	0	0	0	3.66667	0	0	#NUM!	0.046883	C:cytoplasm; F:transferase activity, transferring acyl groups; P:endocytosis; P:metabolic process
B7Q0S9	Myostatin, putative	Ixodes scapularis GN	376	42.3442	8.60205	2	4	11	14	0	5.32	1	1	0	18.88	4	5	1.35057	16.22	5	5	0	0	0	0	0	0	0	0	0	0	0	0	3.66667	0	0	#NUM!	0.046883	C:extracellular region; F:growth factor activity; P:growth
B7Q0Y8	Putative uncharacterized protein	Ixodes scapularis GN	212	22.8063	4.97021	1	1	10	16	0	17.45	2	3	0	17.92	4	4	0	31.13	4	4	0	0	0	0	0	4.25	1	1	0	0	0	0	3.66667	0.333333	0.0909091	-3.45943	0.046883	-
B7Q630	Coiled-coil domain-containing protein MTMR15, putative	Ixodes scapularis GN	542	60.9927	8.74854	3	4	11	24	0	3.87	3	3	1.30684	13.47	5	5	0	7.75	3	5	0	0	0	0	0	0	0	0	0	0	0	0	4.33333	0	0	#NUM!	0.046883	F:hydrolase activity, acting on ester bonds; P:metabolic process
B7QDP7	Putative uncharacterized protein	Ixodes scapularis GN	405	43.8509	9.15869	1	3	8	19	0	6.17	2	3	0	0	0	0	3.82454	15.06	5	8	0	0	0	0	0	0	0	0	0	0	0	0	3.66667	0	0	#NUM!	0.046883	-
B7QEL2	Glycolate oxidase, putative (Fragment)	Ixodes scapularis GN	318	35.581	9.45166	4	1	11	11	0	21.38	6	6	1.73339	19.81	5	5	0	0	0	0	0	0	0	0	0	0	0	0	0	0	0	0	3.66667	0	0	#NUM!	0.046883	F:FMN binding; F:very-long-chain-(S)-2-hydroxy-acid oxidase activity; F:long-chain-(S)-2-hydroxy-long-chain-acid oxidase activity; F:medium-chain-(S)-2-hydroxy-acid oxidase activity; P:oxidation-reduction process
B7QFV4	DNA polymerase (Fragment)	Ixodes scapularis GN	745	83.6435	9.12939	1	1	13	15	5.354	10.07	5	6	0	7.52	4	5	0	0	0	0	0	0	0	0	0	0	0	0	0	0	0	0	3.66667	0	0	#NUM!	0.046883	C:zeta DNA polymerase complex; F:nucleotide binding; F:DNA binding; F:DNA-directed DNA polymerase activity; P:DNA replication; P:translesion synthesis
B7QGH9	Putative uncharacterized protein	Ixodes scapularis GN	304	32.6523	9.46631	1	4	11	12	0	6.58	2	2	1.60565	15.79	4	4	0	22.7	6	6	0	0	0	0	0	0	0	0	0	0	0	0	4	0	0	#NUM!	0.046883	-
B7QGS5	Isochorismatase domain-containing protein 2, putative (Fragment)	Ixodes scapularis GN	205	22.3205	8.00146	1	3	6	12	0	27.8	4	7	0	8.78	1	1	0	29.27	4	4	0	0	0	0	0	0	0	0	0	0	0	0	4	0	0	#NUM!	0.046883	F:isochorismatase activity; P:metabolic process
B7QL64	Eto/mtg8/nervy, putative	Ixodes scapularis GN	378	40.5982	7.25439	1	2	11	14	0	20.11	5	5	0	6.88	2	3	0	15.61	5	5	0	0	0	0	0	0	0	0	0	0	0	0	4.33333	0	0	#NUM!	0.046883	F:transcription factor activity, sequence-specific DNA binding; F:metal ion binding; P:regulation of transcription, DNA-templated
B7QNJ6	Cell adhesion molecule, putative (Fragment)	Ixodes scapularis GN	799	86.8347	6.40479	1	8	10	13	1.66048	6.13	4	4	2.26867	2.75	2	2	1.68204	5.63	4	5	0	0	0	0	0	0	0	0	0	0	0	0	3.66667	0	0	#NUM!	0.046883	-
G3MG47	Putative uncharacterized protein (Fragment)	Amblyomma maculatum PE	240	26.6866	6.04932	1	1	7	13	4.10083	31.25	5	5	1.63348	23.75	3	3	2.15145	26.25	3	3	0	0	0	0	2.12875	6.67	1	1	0	0	0	0	3.66667	0.333333	0.0909091	-3.45943	0.046883	-
G3MJI9	Putative uncharacterized protein (Fragment)	Amblyomma maculatum PE	456	50.7512	9.77393	2	6	11	12	1.6231	10.75	5	5	0	3.95	1	1	0	10.96	5	6	0	0	0	0	0	0	0	0	0	0	0	0	4	0	0	#NUM!	0.046883	F:protein serine/threonine kinase activity; F:ATP binding; P:protein phosphorylation
G3MK75	NADPH-dependent diflavin oxidoreductase 1	Amblyomma maculatum PE	594	67.2751	7.38623	1	4	13	14	0	6.57	2	2	0	7.74	4	4	1.70322	16.84	7	7	0	0	0	0	0	0	0	0	0	2.02	1	1	4.33333	0.333333	0.0769231	-3.70044	0.046883	C:cytoplasm; F:NADPH-hemoprotein reductase activity; F:iron ion binding; F:FMN binding; F:flavin adenine dinucleotide binding; F:NADP binding; P:iron-sulfur cluster assembly; P:oxidation-reduction process
G3MKT8	Putative uncharacterized protein	Amblyomma maculatum PE	567	62.8975	8.73389	2	2	12	12	1.92263	7.58	4	4	0	0	0	0	0	25.4	8	8	0	0	0	0	0	0	0	0	0	0	0	0	4	0	0	#NUM!	0.046883	F:catalytic activity; P:metabolic process
G3MQL4	Putative uncharacterized protein	Amblyomma maculatum PE	586	65.9136	8.03076	2	2	8	18	0	5.12	2	2	0	9.73	5	5	0	7.68	4	4	0	0	0	0	0	0	0	0	0	0	0	0	3.66667	0	0	#NUM!	0.046883	-
G3MSK7	Putative uncharacterized protein	Amblyomma maculatum PE	218	23.8129	9.15869	4	3	8	15	0	14.68	2	4	1.62904	19.72	2	4	0	12.39	3	3	0	0	0	0	0	0	0	0	0	0	0	0	3.66667	0	0	#NUM!	0.046883	-
L7LPU4	Putative trilaris	Rhipicephalus pulchellus PE	252	28.5928	9.24658	1	4	13	20	0	0	0	0	0	19.05	4	5	0	30.56	6	6	0	0	0	0	0	0	0	0	0	0	0	0	3.66667	0	0	#NUM!	0.046883	F:serine-type endopeptidase inhibitor activity; P:negative regulation of endopeptidase activity
L7LSD1	Putative down syndrome cell adhesion molecule	Rhipicephalus pulchellus PE	888	98.6406	6.81494	1	3	14	22	1.88178	6.87	5	6	2.11179	3.83	3	3	2.17071	4.17	4	4	0	0	0	0	0	0	0	0	1.64363	1.01	1	1	4.33333	0.333333	0.0769231	-3.70044	0.046883	-
L7LTX3	Putative carboxypeptidase inhibitor	Rhipicephalus pulchellus PE	120	13.0555	8.60205	2	4	8	16	1.73813	30.83	2	2	1.88024	42.5	5	6	3.567	41.67	3	3	0	0	0	0	0	0	0	0	0	0	0	0	3.66667	0	0	#NUM!	0.046883	F:metalloendopeptidase inhibitor activity; P:blood coagulation; P:negative regulation of endopeptidase activity
L7LU84	Putative phosphatidylserine-specific receptor ptdserr	Rhipicephalus pulchellus PE	424	48.2266	9.24658	4	2	9	11	0	0	0	0	0	13.68	4	4	0	20.75	7	7	0	0	0	0	0	0	0	0	0	0	0	0	3.66667	0	0	#NUM!	0.046883	-
L7LUD9	Putative short gastrulation	Rhipicephalus pulchellus PE	775	85.0826	8.30908	1	3	8	12	3.28115	10.19	5	7	0	7.35	5	5	0	0	0	0	0	0	0	0	0	0	0	0	0	0	0	0	4	0	0	#NUM!	0.046883	-
L7M0R3	Putative rna-binding protein larp/sro9	Rhipicephalus pulchellus PE	806	90.4919	8.30908	3	5	9	11	2.66986	5.83	5	5	0	2.98	2	2	2.34361	6.82	3	4	0	0	0	0	0	0	0	0	0	0	0	0	3.66667	0	0	#NUM!	0.046883	-
L7M1Z2	Putative solute carrier family 35 member b1	Rhipicephalus pulchellus PE	353	38.8538	9.72998	3	2	7	16	0	15.86	2	3	2.01733	22.38	4	4	0	18.98	3	6	0	0	0	0	0	0	0	0	0	4.25	1	1	4.33333	0.333333	0.0769231	-3.70044	0.046883	C:integral component of membrane; P:transmembrane transport
L7M7R6	Putative cytochrome	Rhipicephalus pulchellus PE	547	60.6963	7.85498	2	3	10	12	0	0	0	0	0	13.89	5	5	1.63854	10.97	6	6	0	0	0	0	0	0	0	0	1.76383	2.19	1	1	3.66667	0.333333	0.0909091	-3.45943	0.046883	-
L7M8J3	Uncharacterized protein	Rhipicephalus pulchellus PE	477	52.1905	6.7124	1	1	8	12	0	17.19	5	5	0	4.61	2	3	1.68633	9.43	3	3	0	0	0	0	0	0	0	0	0	0	0	0	3.66667	0	0	#NUM!	0.046883	-
L7MAB9	Putative metastriate ixostatin family member	Rhipicephalus pulchellus PE	111	12.1859	8.70459	1	1	4	14	0	18.02	1	1	0	0	0	0	0	45.05	3	11	0	0	0	0	0	0	0	0	0	0	0	0	4	0	0	#NUM!	0.046883	-
L7MAY1	Uncharacterized protein (Fragment)	Rhipicephalus pulchellus PE	490	54.4913	8.51416	2	8	13	16	0	17.96	7	8	0	0	0	0	0	8.16	3	3	0	0	0	0	0	0	0	0	0	0	0	0	3.66667	0	0	#NUM!	0.046883	F:nucleic acid binding; F:metal ion binding
L7MBJ7	Putative zinc finger protein (Fragment)	Rhipicephalus pulchellus PE	242	27.3615	9.68604	1	5	12	19	0	0	0	0	0	35.54	6	8	0	19.01	3	5	0	8.26	1	1	0	0	0	0	0	0	0	0	4.33333	0.333333	0.0769231	-3.70044	0.046883	F:nucleic acid binding; F:metal ion binding
L7MEW4	Putative big brain (Fragment)	Rhipicephalus pulchellus PE	387	41.4542	9.26123	1	1	5	17	0	0	0	0	0	4.65	2	7	0	5.68	2	4	0	0	0	0	0	0	0	0	0	0	0	0	3.66667	0	0	#NUM!	0.046883	C:integral component of membrane; F:transporter activity; P:transport
L7MH60	Putative snf4/amp-activated protein kinase gamma subunit (Fragment)	Rhipicephalus pulchellus PE	589	65.5727	8.32373	4	1	17	24	0	0	0	0	0	13.07	5	5	1.72519	12.9	6	6	0	0	0	0	0	0	0	0	0	0	0	0	3.66667	0	0	#NUM!	0.046883	F:kinase activity; P:phosphorylation
L7MIY0	Putative rapgap1 (Fragment)	Rhipicephalus pulchellus PE	770	84.8696	6.43018	2	3	15	18	1.73951	4.68	3	3	0	5.58	2	2	0	8.57	6	6	0	0	0	0	0	0	0	0	0	0	0	0	3.66667	0	0	#NUM!	0.046883	F:GTPase activator activity; P:positive regulation of GTPase activity; P:regulation of small GTPase mediated signal transduction
L7MK61	Putative threonine aldolase (Fragment)	Rhipicephalus pulchellus PE	379	41.759	6.40479	2	2	14	18	1.77778	4.49	2	3	0	23.48	6	6	0	13.98	3	4	0	0	0	0	0	0	0	0	0	0	0	0	4.33333	0	0	#NUM!	0.046883	F:lyase activity; P:cellular amino acid metabolic process
V5GG60	Putative transmembrane transport	Ixodes ricinus PE	469	50.4293	9.27588	1	1	8	14	0	14.07	5	5	1.77738	16.42	5	6	0	0	0	0	0	2.56	1	1	0	0	0	0	0	0	0	0	3.66667	0.333333	0.0909091	-3.45943	0.046883	C:integral component of membrane; F:transporter activity; P:transmembrane transport
V5GRT4	Putative cell-cycle nuclear protein (Fragment)	Ixodes ricinus PE	793	85.6038	5.0083	2	10	12	14	2.204	7.31	5	5	1.72062	3.4	2	2	2.15372	5.04	3	4	0	0	0	0	0	0	0	0	0	0	0	0	3.66667	0	0	#NUM!	0.046883	-
V5GVZ5	Uncharacterized protein	Ixodes ricinus PE	418	46.1816	11.5024	1	7	11	17	1.73937	20.1	7	7	2.89825	14.83	6	6	0	0	0	0	0	0	0	0	0	0	0	0	0	0	0	0	4.33333	0	0	#NUM!	0.046883	-
V5H364	Uncharacterized protein	Ixodes ricinus PE	363	39.1969	6.13818	2	1	2	12	1.61023	6.34	1	2	0	6.61	2	5	0	6.61	2	5	0	0	0	0	0	0	0	0	0	0	0	0	4	0	0	#NUM!	0.046883	C:integral component of membrane; F:transmembrane transporter activity; P:transmembrane transport
V5H3V6	Uncharacterized protein	Ixodes ricinus PE	160	18.1015	8.01611	1	3	6	12	0	25	2	3	0	26.25	3	4	0	11.88	3	5	0	0	0	0	0	0	0	0	0	0	0	0	4	0	0	#NUM!	0.046883	-
V5HAU3	Uncharacterized protein (Fragment)	Ixodes ricinus PE	216	24.9904	5.22412	1	1	5	13	1.87455	5.09	3	4	0	14.35	2	2	1.75984	20.83	4	6	0	5.09	1	1	0	0	0	0	0	0	0	0	4	0.333333	0.0833333	-3.58496	0.046883	-
V5HCH2	Putative cell-matrix adhesion	Ixodes ricinus PE	1135	130.83	7.1958	2	2	11	13	0	8.55	7	7	0	8.63	6	6	0	0	0	0	0	0	0	0	0	0	0	0	0	0	0	0	4.33333	0	0	#NUM!	0.046883	P:cell-matrix adhesion
V5HDK9	Uncharacterized protein (Fragment)	Ixodes ricinus PE	279	31.3593	10.0522	3	2	11	19	0	22.58	5	5	0	16.85	4	4	0	26.16	4	4	0	0	0	0	0	4.3	1	1	0	0	0	0	4.33333	0.333333	0.0769231	-3.70044	0.046883	-
V5HIP8	Uncharacterized protein (Fragment)	Ixodes ricinus PE	81	8.93426	8.27979	1	2	5	12	2.00182	56.79	2	4	0	23.46	1	2	2.09345	59.26	4	6	0	0	0	0	0	0	0	0	0	0	0	0	4	0	0	#NUM!	0.046883	F:serine-type endopeptidase inhibitor activity; P:negative regulation of endopeptidase activity
V5HS71	Putative secreted protein (Fragment)	Ixodes ricinus PE	125	13.9949	7.88428	1	2	2	12	0	18.4	1	4	0	0	0	0	0	18.4	2	7	0	0	0	0	0	0	0	0	0	0	0	0	3.66667	0	0	#NUM!	0.046883	-
V5HWX0	Putative muscle-specific protein (Fragment)	Ixodes ricinus PE	661	72.4809	5.65576	1	6	12	15	0	5.45	3	3	0	3.18	2	2	1.62636	17.25	8	8	0	1.06	1	1	0	0	0	0	0	0	0	0	4.33333	0.333333	0.0769231	-3.70044	0.046883	-
V5HXL9	Putative ribosomal protein	Ixodes ricinus PE	139	14.782	10.0962	3	4	9	15	1.76824	39.57	4	4	2.24724	40.29	4	4	1.89861	18.71	2	3	0	0	0	0	0	0	0	0	0	0	0	0	3.66667	0	0	#NUM!	0.046883	C:ribosome; F:structural constituent of ribosome; P:translation
V5IH40	Putative tick metalloprotease (Fragment)	Ixodes ricinus PE	475	53.7382	9.30518	1	2	12	19	0	0	0	0	1.65386	12	5	6	1.61423	17.05	6	6	0	0	0	0	0	0	0	0	0	0	0	0	4	0	0	#NUM!	0.046883	F:metalloendopeptidase activity; P:proteolysis
D7F480	Gut cell surface glycoprotein	Rhipicephalus appendiculatus GN	693	75.9773	6.37939	1	2	45	83	1.64263	7.79	4	4	0	12.84	6	7	0	11.83	5	7	1.61327	17.75	11	13	2.02023	14	10	11	3.77398	28.86	16	22	6	15.3333	2.55556	1.35364	0.046215	-
A0A023FDH8	Putative dolichyl-diphosphooligosaccharide--protein glycosyltransferase subunit 2 (Fragment)	Amblyomma cajennense PE	647	70.3207	8.92432	3	1	10	18	0	0	0	0	0	0	0	0	1.60397	1.24	1	1	4.70734	7.42	4	4	3.98781	7.11	3	4	2.79991	5.87	3	3	0.333333	3.66667	11	3.45943	0.044134	C:oligosaccharyltransferase complex; C:integral component of membrane; F:transferase activity; P:protein N-linked glycosylation
A0A023FL10	Putative n-acetylglucosaminyltransferase i (Fragment)	Amblyomma cajennense PE	401	46.315	9.45166	3	3	12	20	0	0	0	0	0	0	0	0	0	0	0	0	1.7277	10.47	4	5	2.07161	6.23	2	2	1.64264	15.71	6	6	0	4.33333	#DIV/0!	#DIV/0!	0.044134	F:acetylglucosaminyltransferase activity; P:protein glycosylation
A0A023FLY5	Putative serine/threonine protein kinase	Amblyomma cajennense PE	531	60.097	6.16357	2	1	11	12	1.61985	1.51	1	1	0	0	0	0	0	0	0	0	0	17.7	6	6	1.72285	9.6	5	5	0	0	0	0	0.333333	3.66667	11	3.45943	0.044134	F:protein serine/threonine kinase activity; F:ATP binding; P:protein phosphorylation
A0A023FUM8	Putative tick metalloprotease 1 (Fragment)	Amblyomma cajennense PE	502	56.4407	6.80029	1	1	10	11	0	0	0	0	0	0	0	0	0	0	0	0	0	12.95	5	5	0	11.55	4	5	1.83505	2.79	1	1	0	3.66667	#DIV/0!	#DIV/0!	0.044134	F:metalloendopeptidase activity; P:proteolysis
A0A023FZ38	Putative cell division cycle 37 protein cdc37	Amblyomma parvum PE	360	42.2023	5.32568	1	1	11	17	0	0	0	0	0	0	0	0	0	0	0	0	1.94358	8.61	3	4	0	19.44	6	7	0	0	0	0	0	3.66667	#DIV/0!	#DIV/0!	0.044134	F:protein kinase binding; P:cell division
A0A023G260	Putative secreted protein (Fragment)	Amblyomma triste PE	280	30.7058	7.97217	1	6	11	14	0	0	0	0	0	0	0	0	0	0	0	0	0	0	0	0	1.78605	28.21	5	5	1.74744	25	6	6	0	3.66667	#DIV/0!	#DIV/0!	0.044134	-
A0A023G286	Putative soluble epoxide hydrolase (Fragment)	Amblyomma parvum PE	403	46.7358	8.92432	1	3	11	15	0	0	0	0	0	0	0	0	0	0	0	0	0	17.62	5	5	0	0	0	0	0	15.38	4	6	0	3.66667	#DIV/0!	#DIV/0!	0.044134	F:hydrolase activity; P:metabolic process
A0A023G8C1	Putative fkbp-type peptidyl-prolyl cis-trans isomerase (Fragment)	Amblyomma triste PE	343	38.7283	6.25244	1	1	11	13	0	0	0	0	0	0	0	0	0	0	0	0	0	16.33	5	5	2.03998	21.57	5	5	0	16.33	3	3	0	4.33333	#DIV/0!	#DIV/0!	0.044134	F:isomerase activity; P:protein folding
A0A023GCT5	Putative cytochrome p450 cyp4/cyp19/cyp26 subfamily (Fragment)	Amblyomma triste PE	495	55.1295	7.38623	1	4	8	26	0	0	0	0	0	0	0	0	0	0	0	0	0	8.08	2	5	0	6.26	2	5	0	2.83	2	3	0	4.33333	#DIV/0!	#DIV/0!	0.044134	F:iron ion binding; F:oxidoreductase activity, acting on paired donors, with incorporation or reduction of molecular oxygen; F:heme binding; P:oxidation-reduction process
A0A023GE07	Putative mitochondrial intermembrane space protein transporter complex	Amblyomma triste PE	139	15.6297	7.15186	3	1	14	21	0	0	0	0	0	0	0	0	0	0	0	0	0	48.2	6	8	0	30.94	4	5	0	0	0	0	0	4.33333	#DIV/0!	#DIV/0!	0.044134	-
A0A023GF64	Putative buzidau (Fragment)	Amblyomma triste PE	419	47.5656	7.04932	2	4	10	14	0	0	0	0	0	0	0	0	0	0	0	0	0	13.84	5	5	0	17.9	4	7	0	0	0	0	0	4	#DIV/0!	#DIV/0!	0.044134	-
A0A023GGC2	Putative cytoplasmic dynein intermediate chain (Fragment)	Amblyomma triste PE	706	78.2128	5.92236	1	1	4	12	0	0	0	0	0	0	0	0	0	0	0	0	1.87314	6.09	3	5	1.88322	1.42	1	1	3.97543	3.26	2	5	0	3.66667	#DIV/0!	#DIV/0!	0.044134	C:cytoplasmic dynein complex; P:microtubule-based movement
A0A023GGE3	Putative atp-dependent zinc metalloprotease yme1	Amblyomma triste PE	748	83.0473	8.73389	1	3	8	12	0	0	0	0	0	0	0	0	0	0	0	0	4.01705	3.07	2	3	4.42665	5.75	3	3	4.0603	10.03	6	6	0	4	#DIV/0!	#DIV/0!	0.044134	C:membrane; F:metalloendopeptidase activity; F:ATP binding; P:proteolysis
A0A023GH89	Putative ceramide glucosyltransferase (Fragment)	Amblyomma triste PE	391	44.8863	8.1626	1	1	5	11	0	0	0	0	0	0	0	0	0	0	0	0	3.43211	18.67	5	7	0	0	0	0	1.89003	5.63	2	4	0	3.66667	#DIV/0!	#DIV/0!	0.044134	F:transferase activity, transferring glycosyl groups; P:metabolic process
A0A023GHW6	Putative mitochondrial/ ribosomal protein	Amblyomma triste PE	293	33.8295	9.26123	2	3	13	18	0	5.8	1	1	0	0	0	0	0	0	0	0	1.80053	30.72	6	6	0	0	0	0	1.78347	23.89	5	6	0.333333	4	12	3.58496	0.044134	C:large ribosomal subunit; F:structural constituent of ribosome; P:translation
A0A023GKD8	Putative acetylcholinesterase/butyrylcholinesterase (Fragment)	Amblyomma triste PE	467	50.7372	6.46826	1	2	7	12	0	0	0	0	0	0	0	0	0	0	0	0	0	10.71	3	4	0	10.92	4	4	0	11.78	3	3	0	3.66667	#DIV/0!	#DIV/0!	0.044134	F:cholinesterase activity; P:metabolic process
A0A023GLN4	Putative spt2 chromatin protein (Fragment)	Amblyomma triste PE	376	42.3367	6.59521	1	5	9	12	0	0	0	0	0	0	0	0	0	0	0	0	3.89106	14.89	5	5	1.60397	10.37	4	4	0	12.5	3	3	0	4	#DIV/0!	#DIV/0!	0.044134	-
A0A023GLN6	Uncharacterized protein (Fragment)	Amblyomma triste PE	377	42.2098	8.25049	2	6	13	16	0	0	0	0	0	0	0	0	0	0	0	0	0	18.83	4	5	0	22.02	5	6	0	0	0	0	0	3.66667	#DIV/0!	#DIV/0!	0.044134	-
A0A034WWS2	Tropomyosin 1 (Fragment)	Rhipicephalus microplus PE	218	25.2238	4.70361	1	0	10	17	0	0	0	0	0	0	0	0	0	0	0	0	0	16.97	3	3	1.99991	11.47	3	3	10.117	33.49	6	7	0	4.33333	#DIV/0!	#DIV/0!	0.044134	-
A1IIA9	Metalloprotease	Haemaphysalis longicornis GN	483	54.8566	8.49951	1	1	8	13	0	0	0	0	0	0	0	0	0	0	0	0	0	0	0	0	0	11.59	5	7	0	7.87	3	4	0	3.66667	#DIV/0!	#DIV/0!	0.044134	F:metalloendopeptidase activity; P:proteolysis
A6N9Q5	Salivary lipocalin	Ornithodoros parkeri PE	199	22.8898	7.60596	1	1	8	13	0	0	0	0	0	0	0	0	0	0	0	0	1.68589	53.77	6	7	1.90075	33.17	4	4	0	22.11	2	2	0	4.33333	#DIV/0!	#DIV/0!	0.044134	-
B5M731	Syntaxin-like protein	Amblyomma americanum PE	165	19.6009	7.85498	1	4	5	14	0	0	0	0	0	0	0	0	0	0	0	0	0	0	0	0	0	15.76	2	4	3.50097	28.48	5	8	0	4	#DIV/0!	#DIV/0!	0.044134	C:intracellular; C:membrane; P:Golgi vesicle transport
B7P501	Zinc finger protein, putative	Ixodes scapularis GN	640	69.124	4.91943	1	1	9	14	0	0	0	0	0	0	0	0	0	0	0	0	0	4.38	3	4	0	9.06	3	5	1.65245	6.09	3	4	0	4.33333	#DIV/0!	#DIV/0!	0.044134	F:nucleic acid binding; F:metal ion binding
B7P9A4	Putative uncharacterized protein	Ixodes scapularis GN	653	72.6271	6.87354	1	2	14	16	0	0	0	0	0	2.91	1	1	0	0	0	0	2.09278	9.19	5	5	0	13.48	7	7	0	0	0	0	0.333333	4	12	3.58496	0.044134	-
B7PFI8	Putative uncharacterized protein	Ixodes scapularis GN	980	106.638	8.98291	2	5	7	12	0	0	0	0	0	0	0	0	0	0	0	0	0	9.29	4	7	2.02136	7.24	4	5	0	0	0	0	0	4	#DIV/0!	#DIV/0!	0.044134	C:nuclear speck; F:transcription coactivator activity; P:Notch signaling pathway; P:positive regulation of transcription from RNA polymerase II promoter
B7PFN6	Death-associated protein kinase, putative (Fragment)	Ixodes scapularis GN	862	94.1672	6.44287	1	2	10	15	0	1.16	1	1	0	0	0	0	0	0	0	0	0	4.87	3	3	0	5.68	4	4	1.64847	4.99	3	4	0.333333	3.66667	11	3.45943	0.044134	F:kinase activity; F:2-alkenal reductase [NAD(P)] activity; P:signal transduction; P:phosphorylation; P:oxidation-reduction process
B7PGN8	Putative uncharacterized protein	Ixodes scapularis GN	550	60.9204	5.80811	1	2	9	11	0	0	0	0	0	0	0	0	0	0	0	0	1.60695	8.55	4	4	0	7.27	3	3	2.22041	9.27	4	4	0	3.66667	#DIV/0!	#DIV/0!	0.044134	-
B7PLM8	Dehydrogenase, putative	Ixodes scapularis GN	288	31.0788	6.62451	2	2	8	12	0	0	0	0	0	4.17	1	1	0	0	0	0	0	14.58	4	5	1.77351	7.64	2	2	0	20.83	4	4	0.333333	3.66667	11	3.45943	0.044134	F:3-dehydrosphinganine reductase activity; P:oxidation-reduction process
B7PMP3	Ankyrin repeat-containing protein	Ixodes scapularis GN	400	44.384	8.85107	1	4	9	18	0	0	0	0	1.99434	2	1	1	0	0	0	0	5.18917	9.75	4	4	3.74846	7.25	5	5	3.30879	4.75	2	2	0.333333	3.66667	11	3.45943	0.044134	F:2-alkenal reductase [NAD(P)] activity; P:signal transduction; P:oxidation-reduction process
B7PQS0	G patch domain-containing protein, putative	Ixodes scapularis GN	511	57.8265	6.45557	1	2	12	15	0	0	0	0	0	0	0	0	0	0	0	0	0	9.78	5	5	0	4.5	2	2	0	9.59	4	4	0	3.66667	#DIV/0!	#DIV/0!	0.044134	F:nucleic acid binding
B7PSG7	Galactosyltransferase, putative	Ixodes scapularis GN	328	38.4016	8.646	1	1	6	11	0	0	0	0	0	0	0	0	0	0	0	0	0	0	0	0	0	8.23	3	8	0	11.59	3	3	0	3.66667	#DIV/0!	#DIV/0!	0.044134	C:Golgi apparatus; C:integral component of membrane; F:ganglioside galactosyltransferase activity; P:protein glycosylation
B7PZD5	AMP dependent ligase, putative (Fragment)	Ixodes scapularis GN	435	48.3545	8.01611	1	2	8	11	0	0	0	0	0	0	0	0	0	0	0	0	0	9.66	3	3	0	12.64	3	3	0	13.79	4	5	0	3.66667	#DIV/0!	#DIV/0!	0.044134	F:glutamate racemase activity; F:ligase activity; P:metabolic process
B7Q1V9	Putative uncharacterized protein	Ixodes scapularis GN	469	51.1074	8.95361	1	2	6	15	0	0	0	0	0	0	0	0	0	0	0	0	1.80253	9.59	4	5	0	0	0	0	0	4.9	3	6	0	3.66667	#DIV/0!	#DIV/0!	0.044134	-
B7Q7Z9	Centromere protein B, putative	Ixodes scapularis GN	280	30.3829	8.25049	1	1	10	13	0	0	0	0	0	0	0	0	0	0	0	0	0	10.71	2	2	0	28.21	5	5	0	18.93	4	4	0	3.66667	#DIV/0!	#DIV/0!	0.044134	F:DNA binding
B7QLF2	Spermatogenesis-associated protein 2/tamozhennic, putative	Ixodes scapularis GN	293	32.2081	5.8208	1	3	11	17	0	8.53	1	1	0	0	0	0	0	0	0	0	0	19.45	4	6	0	13.99	3	3	0	11.95	2	2	0.333333	3.66667	11	3.45943	0.044134	F:zinc ion binding
G3MFW1	Putative uncharacterized protein (Fragment)	Amblyomma maculatum PE	226	27.1699	9.15869	1	3	7	14	0	0	0	0	0	0	0	0	0	0	0	0	1.69452	14.16	4	5	2.78937	13.27	2	3	0	8.41	3	3	0	3.66667	#DIV/0!	#DIV/0!	0.044134	-
L7M264	Putative spinophilin	Rhipicephalus pulchellus PE	1344	145.717	5.8335	1	2	15	17	0	0	0	0	0	0	0	0	0	0	0	0	0	1.64	3	3	0	5.06	5	5	0	2.08	4	4	0	4	#DIV/0!	#DIV/0!	0.044134	-
L7M6S7	Uncharacterized protein	Rhipicephalus pulchellus PE	605	68.3001	6.59521	2	2	8	11	0	0	0	0	0	0	0	0	0	0	0	0	0	9.75	4	6	0	0	0	0	1.60339	12.4	5	5	0	3.66667	#DIV/0!	#DIV/0!	0.044134	-
L7M757	Putative cyclophilin type u box-containing peptidyl-prolyl cis-trans isomerase	Rhipicephalus pulchellus PE	519	58.8661	8.67529	1	3	10	13	0	0	0	0	0	0	0	0	0	0	0	0	0	11.75	6	7	0	10.02	5	5	0	3.47	1	1	0	4.33333	#DIV/0!	#DIV/0!	0.044134	F:peptidyl-prolyl cis-trans isomerase activity; F:ubiquitin-protein transferase activity; F:ligase activity; P:protein peptidyl-prolyl isomerization; P:protein folding; P:protein ubiquitination
L7M7M4	Putative conserved oligomeric golgi complex subunit 7	Rhipicephalus pulchellus PE	747	84.3457	5.24951	2	3	9	18	0	2.01	1	1	0	0	0	0	0	0	0	0	1.8171	14.32	6	9	0	3.21	2	2	0	0	0	0	0.333333	3.66667	11	3.45943	0.044134	C:Golgi transport complex; P:intracellular protein transport
L7MF52	Putative bilaris (Fragment)	Rhipicephalus pulchellus PE	181	20.3939	9.08545	1	3	14	18	0	0	0	0	0	0	0	0	0	0	0	0	0	31.49	8	10	0	3.31	1	1	1.81879	5.52	1	1	0	4	#DIV/0!	#DIV/0!	0.044134	F:serine-type endopeptidase inhibitor activity; P:negative regulation of endopeptidase activity
L7MFL3	Putative calponin logy ch domain-containing protein (Fragment)	Rhipicephalus pulchellus PE	472	53.92	5.57959	1	3	9	11	0	0	0	0	0	0	0	0	0	0	0	0	1.65163	3.81	2	2	2.01023	11.02	5	5	0	12.92	4	4	0	3.66667	#DIV/0!	#DIV/0!	0.044134	-
L7MGD3	Putative leukocyte receptor cluster member 8 (Fragment)	Rhipicephalus pulchellus PE	728	77.9618	9.89111	2	3	12	19	0	0	0	0	0	0	0	0	0	0	0	0	7.17877	9.07	8	11	0	0	0	0	0	0	0	0	0	3.66667	#DIV/0!	#DIV/0!	0.044134	-
L7MI01	Putative transcription factor e2f/dimerization partner tdp (Fragment)	Rhipicephalus pulchellus PE	445	49.0133	5.89697	1	3	9	16	0	0	0	0	0	0	0	0	0	0	0	0	1.60778	5.84	2	3	3.31076	7.42	4	4	1.60925	7.64	3	4	0	3.66667	#DIV/0!	#DIV/0!	0.044134	C:nucleus; C:transcription factor complex; F:DNA binding; F:transcription factor activity, sequence-specific DNA binding; P:transcription, DNA-templated; P:regulation of transcription, DNA-templated
L7MJR7	Putative phosphoglycerate mutase (Fragment)	Rhipicephalus pulchellus PE	603	65.9606	8.6167	1	1	10	13	0	0	0	0	0	0	0	0	0	0	0	0	1.71233	10.45	5	5	2.07857	10.45	5	5	0	3.32	2	2	0	4	#DIV/0!	#DIV/0!	0.044134	C:cytoplasm; F:phosphoglycerate mutase activity; F:manganese ion binding; P:glucose catabolic process
L7MJT2	Putative atp-binding cassette sub-family d member 4 (Fragment)	Rhipicephalus pulchellus PE	677	75.7754	7.23975	1	3	8	13	0	0	0	0	0	0	0	0	0	0	0	0	0	6.06	3	3	0	8.27	5	6	0	5.91	4	4	0	4.33333	#DIV/0!	#DIV/0!	0.044134	C:integral component of membrane; F:ATP binding; F:ATPase activity, coupled to transmembrane movement of substances; P:metabolic process; P:transmembrane transport
V5H222	Uncharacterized protein	Ixodes ricinus PE	308	34.5831	5.41455	1	1	5	16	0	0	0	0	0	0	0	0	0	0	0	0	0	0	0	0	0	17.21	3	6	0	19.81	3	6	0	4	#DIV/0!	#DIV/0!	0.044134	-
V5HCV1	Putative tumor necrosis factor receptor (Fragment)	Ixodes ricinus PE	385	43.2127	7.6499	1	5	9	13	0	3.12	1	1	0	0	0	0	0	0	0	0	0	0	0	0	1.69893	14.81	3	3	0	22.86	7	8	0.333333	3.66667	11	3.45943	0.044134	C:intracellular; F:ubiquitin-protein transferase activity; F:zinc ion binding; P:activation of NF-kappaB-inducing kinase activity; P:protein ubiquitination; P:positive regulation of JNK cascade
V5HIU2	Putative trypsin-like serine protease	Ixodes ricinus PE	564	61.6672	9.01221	1	4	10	16	1.62334	2.48	1	1	0	0	0	0	0	0	0	0	1.72931	9.93	3	4	0	7.8	3	3	0	11.35	3	5	0.333333	4	12	3.58496	0.044134	F:serine-type endopeptidase activity; P:proteolysis
V5HLU8	Putative integral to membrane (Fragment)	Ixodes ricinus PE	270	30.8367	7.6792	1	1	7	21	0	0	0	0	0	0	0	0	0	0	0	0	0	0	0	0	0	20.74	4	6	3.75489	15.93	3	6	0	4	#DIV/0!	#DIV/0!	0.044134	C:intracellular; F:transporter activity; P:transport
V5HP91	Uncharacterized protein (Fragment)	Ixodes ricinus PE	146	16.371	8.60205	1	1	7	18	0	0	0	0	2.04671	18.49	1	1	0	0	0	0	0	40.41	5	8	0	21.23	2	3	0	0	0	0	0.333333	3.66667	11	3.45943	0.044134	C:extracellular region; F:enzyme activator activity; P:digestion; P:lipid catabolic process; P:positive regulation of catalytic activity
V5IEL4	Putative sulfotransferase domain protein (Fragment)	Ixodes ricinus PE	182	21.4546	6.87354	1	3	8	16	0	0	0	0	0	0	0	0	0	0	0	0	1.65595	15.93	3	4	0	15.93	3	4	1.64023	21.43	4	4	0	4	#DIV/0!	#DIV/0!	0.044134	F:sulfotransferase activity; P:metabolic process
V5II23	Putative fe-s oxidoreductase (Fragment)	Ixodes ricinus PE	553	61.3074	7.81104	3	2	10	12	0	0	0	0	0	0	0	0	0	0	0	0	1.6358	10.31	4	4	0	9.04	4	4	0	12.48	4	4	0	4	#DIV/0!	#DIV/0!	0.044134	F:transferase activity; F:4 iron, 4 sulfur cluster binding; P:RNA modification
A0A023FLM6	Protein disulfide-isomerase (Fragment)	Amblyomma cajennense PE	466	53.1749	5.49072	5	2	17	61	7.33536	10.73	5	6	0	0	0	0	4.61717	11.37	5	5	13.7898	18.67	9	13	13.4795	19.31	8	11	10.9843	16.95	8	11	3.66667	11.6667	3.18182	1.66985	0.042796	C:endoplasmic reticulum; F:protein disulfide isomerase activity; F:dioxygenase activity; P:protein folding; P:cell redox homeostasis; P:oxidation-reduction process
A0A023GD75	Protein disulfide-isomerase (Fragment)	Amblyomma triste PE	532	60.4556	5.33838	3	2	20	63	7.33536	10.71	5	6	2.0644	5.64	2	2	4.61717	10.15	4	4	16.0174	18.42	9	13	17.5521	14.85	9	12	14.9599	15.98	8	11	4	12	3	1.58496	0.042796	C:endoplasmic reticulum; F:protein disulfide isomerase activity; F:dioxygenase activity; P:protein folding; P:cell redox homeostasis; P:oxidation-reduction process
L7MJX9	Putative nad+ adp-ribosyltransferase-3-like protein strongylocentrotus purpuratus (Fragment)	Rhipicephalus pulchellus PE	2107	231.443	7.48877	1	5	38	66	0	0	0	0	2.02227	3.37	6	6	2.17075	3.27	7	7	0	4.32	9	9	0	6.5	11	12	0	7.59	13	15	4.33333	12	2.76923	1.46949	0.042796	F:NAD+ ADP-ribosyltransferase activity; P:protein ADP-ribosylation
V5HB41	Putative hat repeat protein	Ixodes ricinus PE	936	105.455	8.1626	2	1	38	80	4.10449	13.25	11	16	3.80284	6.94	7	10	1.72179	14	12	15	0	0	0	0	0	6.62	7	8	0	9.51	7	8	13.6667	5.33333	0.390244	-1.35755	0.041623	C:nucleus; P:mRNA splicing, via spliceosome
A0A023GDC5	Putative scaffold attachment factor b	Amblyomma triste PE	870	95.8317	9.5835	1	7	25	39	0	16.9	11	13	3.74478	11.26	7	7	0	10.34	7	8	1.77927	4.83	4	4	1.93074	3.22	3	3	0	0	0	0	9.33333	2.33333	0.25	-2	0.036649	F:nucleotide binding; F:nucleic acid binding
A0A023GFI4	Putative u4/u6-associated splicing factor prp4 (Fragment)	Amblyomma triste PE	577	66.8877	8.68994	1	9	20	44	1.82364	17.16	8	10	3.93148	7.11	4	8	1.88893	9.71	7	8	0	0	0	0	0	11.09	6	7	0	0	0	0	8.66667	2.33333	0.269231	-1.89308	0.036649	F:protein kinase activity; F:ATP binding; P:protein phosphorylation
A0A023GME5	Putative actin-binding cytoskeleton protein filamin (Fragment)	Amblyomma triste PE	1300	139.524	7.07861	1	1	31	48	0	12.15	12	14	0	5.23	5	6	0	9.69	8	8	0	4.54	5	5	0	0	0	0	0	0	0	0	9.33333	1.66667	0.178571	-2.48543	0.036649	F:actin filament binding
G3MKN9	Putative uncharacterized protein	Amblyomma maculatum PE	759	86.1979	4.93213	2	2	22	37	1.77216	8.83	7	9	1.67883	14.49	12	12	0	9.35	6	6	0	10.01	6	6	0	0	0	0	0	0	0	0	9	2	0.222222	-2.16993	0.036649	C:nucleus
A0A023GKD3	Putative 60s ribosomal protein l7 (Fragment)	Amblyomma triste PE	256	30.2508	10.9458	3	1	16	34	7.30626	23.44	6	6	6.54492	17.97	4	5	11.556	26.17	9	10	3.03672	10.94	3	3	0	0	0	0	0	0	0	0	7	1	0.142857	-2.80735	0.035426	C:ribosome
B7P2Z7	DNA (Cytosine-5)-methyltransferase, putative	Ixodes scapularis GN	230	25.8391	8.83643	1	2	15	28	1.70103	29.57	6	6	1.80842	16.52	5	6	0	22.17	5	8	0	0	0	0	0	6.52	2	2	0	0	0	0	6.66667	0.666667	0.1	-3.32193	0.035426	F:DNA binding; F:glycylpeptide N-tetradecanoyltransferase activity; F:methyltransferase activity; P:DNA methylation
B7QNN3	Low-density lipoprotein receptor, putative (Fragment)	Ixodes scapularis GN	776	86.5916	6.03662	1	4	14	30	0	8.51	4	4	3.88258	10.05	6	7	2.09283	11.08	7	9	0	0	0	0	0	0	0	0	0	4.9	3	4	6.66667	1.33333	0.2	-2.32193	0.035426	-
L7LZ42	Uncharacterized protein	Rhipicephalus pulchellus PE	730	80.3846	6.93213	1	5	19	28	0	7.67	4	5	1.65831	10.82	6	6	0	21.1	10	10	0	0	0	0	1.62445	8.49	4	4	0	0	0	0	7	1.33333	0.190476	-2.39232	0.035426	-
L7LZS3	Putative guanylate-binding protein	Rhipicephalus pulchellus PE	574	66.1069	6.69775	1	5	17	24	0	21.95	8	9	0	6.79	3	4	1.7923	15.68	6	7	0	3.48	2	2	0	0	0	0	0	0	0	0	6.66667	0.666667	0.1	-3.32193	0.035426	F:GTPase activity; F:GTP binding; P:metabolic process
V5HB53	Putative ubiquitin-protein ligase e3b	Ixodes ricinus PE	827	93.3346	7.18115	2	1	20	33	3.43634	5.8	5	5	0	6.17	5	6	1.76766	8.95	7	9	0	0	0	0	0	0	0	0	0	3.63	3	3	6.66667	1	0.15	-2.73697	0.035426	F:ubiquitin-protein transferase activity; F:ligase activity; P:protein ubiquitination
V5HVU2	Putative rna-binding protein elav/hu rrm superfamily (Fragment)	Ixodes ricinus PE	304	33.031	9.48096	3	13	15	31	8.28075	17.11	7	7	4.65209	15.46	5	5	6.09617	26.64	8	9	0	0	0	0	4.16468	13.82	4	4	0	0	0	0	7	1.33333	0.190476	-2.39232	0.035426	F:nucleotide binding; F:RNA binding
A0A023FL72	Putative actin	Amblyomma cajennense PE	376	41.7666	5.22412	5	1	27	599	174.007	69.68	22	95	197.424	64.1	21	94	174.12	50.8	15	82	137.827	48.94	14	58	145.927	49.2	17	67	150.314	56.65	18	65	90.3333	63.3333	0.701107	-0.512293	0.035199	F:ATP binding
L7MI22	Uncharacterized protein (Fragment)	Rhipicephalus pulchellus PE	440	49.9468	8.90967	1	3	11	61	6.61257	6.82	3	13	4.97365	10	3	7	1.6545	13.18	6	13	1.77442	1.82	1	3	0	3.41	2	3	3.48022	4.09	2	3	11	3	0.272727	-1.87447	0.034473	F:nucleic acid binding; F:zinc ion binding
A0A023GJF8	Putative actin	Amblyomma triste PE	376	41.7668	5.47803	10	1	32	678	197.275	83.24	26	108	223.764	75.27	24	105	190.088	59.31	19	90	159.03	54.52	16	67	166.492	57.71	21	78	171.519	59.84	19	72	101	72.3333	0.716172	-0.481623	0.033724	F:ATP binding
B7QCM4	Putative uncharacterized protein (Fragment)	Ixodes scapularis GN	409	42.9647	8.36768	1	2	6	44	0	0	0	0	0	0	0	0	1.3549	4.89	2	5	6.28787	11.98	4	12	2.61699	8.07	3	10	2.06861	6.85	3	6	1.66667	9.33333	5.6	2.48543	0.033017	C:integral component of membrane; P:transport
G3MKA4	Putative uncharacterized protein	Amblyomma maculatum PE	507	57.4215	7.28369	6	2	24	42	0	0	0	0	0	0	0	0	0	10.45	5	5	2.92515	10.26	5	8	5.35833	15.78	7	11	3.09968	17.55	8	9	1.66667	9.33333	5.6	2.48543	0.033017	C:cytoplasm; F:histidine-tRNA ligase activity; F:ATP binding; P:histidyl-tRNA aminoacylation
L7MKI4	Uncharacterized protein (Fragment)	Rhipicephalus pulchellus PE	1067	118.523	9.89111	1	7	33	53	0	0	0	0	2.01365	2.16	2	2	1.68133	6.28	5	5	0	9.09	10	11	1.61039	10.68	7	8	0	6.65	6	8	2.33333	9	3.85714	1.94753	0.033017	-
V5HW27	Putative programmed cell death protein	Ixodes ricinus PE	835	92.4997	6.37939	1	3	24	40	0	0	0	0	0	0	0	0	5.63685	6.59	4	6	15.7552	13.41	11	13	9.09278	6.47	6	6	8.61994	10.06	8	9	2	9.33333	4.66667	2.22239	0.033017	-
A0A023FTB8	Adenosylhomocysteinase	Amblyomma parvum PE	490	54.5583	7.53271	2	2	14	29	0	5.51	3	4	0	0	0	0	0	0	0	0	1.38538	10.61	5	7	2.94262	17.76	7	9	1.54882	9.39	4	5	1.33333	7	5.25	2.39232	0.032398	F:adenosylhomocysteinase activity; P:one-carbon metabolic process
A0A023G7P1	Uncharacterized protein (Fragment)	Amblyomma triste PE	421	47.4671	8.14795	1	4	11	28	0	0	0	0	1.82359	7.84	3	4	0	0	0	0	0	15.68	4	7	1.89617	12.11	6	7	0	16.86	5	6	1.33333	6.66667	5	2.32193	0.032398	C:mitochondrion; F:single-stranded DNA exodeoxyribonuclease activity; P:mitochondrial DNA repair
B7P1K7	WD and tetratricopeptide repeats containing protein, putative	Ixodes scapularis GN	486	53.8854	7.1665	1	3	11	24	0	0	0	0	0	6.58	2	3	0	0	0	0	1.32308	17.49	6	6	1.34668	11.11	4	6	0	22.63	7	9	1	7	7	2.80735	0.032398	-
B7QLI1	Vacuolar sorting protein, putative (Fragment)	Ixodes scapularis GN	738	84.6736	5.80811	1	2	17	25	0	0	0	0	0	7.45	4	4	0	0	0	0	1.72425	12.87	7	7	1.6126	7.59	4	4	4.21683	10.43	7	9	1.33333	6.66667	5	2.32193	0.032398	C:intracellular; C:retromer complex; P:protein transport; P:retrograde transport, endosome to Golgi
L7LY76	Putative tick transposon	Rhipicephalus pulchellus PE	1134	130.969	8.51416	1	19	30	41	0	3.62	2	4	0	0	0	0	0	0	0	0	1.68993	7.23	6	6	0	8.29	7	7	0	11.2	8	8	1.33333	7	5.25	2.39232	0.032398	-
L7M9G0	Putative rna-binding protein	Rhipicephalus pulchellus PE	1011	107.807	9.23193	3	7	28	33	0	4.65	3	3	0	0	0	0	0	0	0	0	2.01072	5.93	4	5	0	13.75	9	9	0	8.8	6	7	1	7	7	2.80735	0.032398	F:nucleotide binding; F:nucleic acid binding
L7MK14	Putative translation initiation factor if-2 (Fragment)	Rhipicephalus pulchellus PE	778	84.693	6.87354	2	5	15	26	2.01101	2.96	2	2	0	0	0	0	1.99491	3.21	2	2	1.88676	8.35	6	7	0	10.41	7	7	1.90057	11.31	6	8	1.33333	7.33333	5.5	2.45943	0.032398	F:translation initiation factor activity; F:zinc ion binding; P:translational initiation
V5HZ13	Ubiquitin carboxyl-terminal hydrolase (Fragment)	Ixodes ricinus PE	894	102.031	6.62451	2	1	24	28	0	0	0	0	0	0	0	0	0	8.17	4	4	1.64438	10.29	7	7	2.08367	10.74	9	9	0	6.94	4	4	1.33333	6.66667	5	2.32193	0.032398	F:ubiquitin-specific protease activity; P:ubiquitin-dependent protein catabolic process
V5HI56	Putative helicase (Fragment)	Ixodes ricinus PE	736	81.3611	8.47021	1	7	31	50	0	18.21	8	10	0	0	0	0	0	0	0	0	0	12.36	8	8	0	19.29	10	11	3.52584	21.06	13	13	3.33333	10.6667	3.2	1.67807	0.030608	F:helicase activity; P:metabolic process
E4W3Z2	Heat shock 70 kDa protein 5	Haemaphysalis longicornis PE	660	72.4295	5.41455	2	6	38	275	74.6524	27.58	18	36	25.0476	15.91	8	10	68.2304	25.76	18	34	97.8186	26.06	17	46	77.0487	29.09	21	41	94.6825	29.39	21	48	26.6667	45	1.6875	0.754888	0.029532	F:ATP binding
L7MED2	Putative growth hormone-regulated tbc protein (Fragment)	Rhipicephalus pulchellus PE	1486	162.019	7.81104	2	28	44	66	0	11.57	12	14	0	10.03	9	10	3.48188	17.5	18	21	2.18431	8.55	8	8	2.01496	5.79	7	7	0	0	0	0	15	5	0.333333	-1.58496	0.02725	-
A0A023FLG4	Putative splicing factor proline-and glutamine-rich	Amblyomma cajennense PE	436	50.16	6.06201	1	2	10	19	3.45534	17.43	6	8	2.005	5.96	3	3	3.21625	11.93	5	5	0	0	0	0	0	0	0	0	0	0	0	0	5.33333	0	0	#NUM!	0.026287	F:nucleotide binding; F:nucleic acid binding
A0A023FMJ5	Putative m13 family peptidase	Amblyomma cajennense PE	422	47.8445	8.48486	1	4	10	14	1.30765	13.51	5	6	0	13.98	4	5	0	14.69	3	3	0	0	0	0	0	0	0	0	0	0	0	0	4.66667	0	0	#NUM!	0.026287	F:metalloendopeptidase activity; P:proteolysis
A0A023FUY8	Putative ribosomal protein l8 (Fragment)	Amblyomma parvum PE	268	29.0637	10.8872	2	1	16	26	5.52044	24.25	7	7	1.65755	8.21	3	3	4.06732	14.55	4	5	0	5.22	1	1	0	0	0	0	0	0	0	0	5	0.333333	0.0666667	-3.90689	0.026287	C:ribosome; F:structural constituent of ribosome; P:translation
B1GTW3	Metis1 protein	Ixodes ricinus GN	488	55.5732	7.57666	3	5	14	20	0	14.75	5	5	0	18.24	6	6	1.6654	9.02	3	3	0	0	0	0	0	0	0	0	0	0	0	0	4.66667	0	0	#NUM!	0.026287	F:metalloendopeptidase activity; P:proteolysis
B7PAA7	Putative uncharacterized protein	Ixodes scapularis GN	188	20.5339	11.9126	1	4	9	17	3.57199	17.02	3	5	1.75748	21.81	3	3	3.76167	36.17	6	8	0	0	0	0	0	0	0	0	0	0	0	0	5.33333	0	0	#NUM!	0.026287	-
B7PEK4	F-box/leucine rich repeat protein, putative	Ixodes scapularis GN	384	43.3488	9.89111	1	2	13	21	0	20.05	7	8	0	8.85	3	3	0	11.72	5	5	0	0	0	0	0	0	0	0	0	3.65	1	1	5.33333	0.333333	0.0625	-4	0.026287	-
B7PFC2	Protease, putative	Ixodes scapularis GN	810	92.421	7.09326	1	3	13	20	0	6.79	3	4	0	2.35	1	1	3.69721	9.63	6	9	0	0	0	0	0	0	0	0	0	0	0	0	4.66667	0	0	#NUM!	0.026287	F:metalloendopeptidase activity; P:proteolysis
B7PND8	Tropomyosin, putative	Ixodes scapularis GN	582	64.2837	7.41553	1	8	21	25	0	19.07	8	8	0	4.3	2	2	1.60752	16.67	6	6	0	0	0	0	0	0	0	0	0	0	0	0	5.33333	0	0	#NUM!	0.026287	-
B7PZH9	Cell cycle control protein 50A, putative	Ixodes scapularis GN	335	37.8034	8.6167	1	1	6	17	0	0	0	0	1.60487	11.94	4	8	1.69442	14.93	3	8	0	0	0	0	0	0	0	0	0	0	0	0	5.33333	0	0	#NUM!	0.026287	C:membrane
B7Q372	Multidrug resistance protein, putative	Ixodes scapularis GN	1449	161.51	6.45557	2	6	23	30	0	2.07	3	3	0	1.93	2	2	0	9.04	9	9	0	0	0	0	0	0	0	0	0	0	0	0	4.66667	0	0	#NUM!	0.026287	C:integral component of membrane; F:ATP binding; F:2-alkenal reductase [NAD(P)] activity; F:ATPase activity, coupled to transmembrane movement of substances; P:transmembrane transport; P:oxidation-reduction process
B7QEZ3	Neprilysin, putative	Ixodes scapularis GN	776	88.9725	7.04932	1	7	15	21	0	0	0	0	1.8401	7.99	3	3	1.60457	13.02	8	13	0	0	0	0	0	0	0	0	0	0	0	0	5.33333	0	0	#NUM!	0.026287	F:metalloendopeptidase activity; P:proteolysis
B7QKX8	Nuclear pore complex protein nup98, putative	Ixodes scapularis GN	1327	145.953	6.07471	1	1	17	23	0	5.95	4	5	1.8086	4.07	4	5	0	3.54	3	4	0	0	0	0	0	0	0	0	0	0	0	0	4.66667	0	0	#NUM!	0.026287	C:nuclear pore; P:transport
G3MF97	Putative uncharacterized protein (Fragment)	Amblyomma maculatum PE	490	53.4809	6.55127	3	5	9	23	2.20475	10.61	4	4	3.55955	13.27	6	7	1.61145	11.43	4	5	0	0	0	0	0	0	0	0	0	0	0	0	5.33333	0	0	#NUM!	0.026287	F:oxidoreductase activity, acting on the aldehyde or oxo group of donors, NAD or NADP as acceptor; P:oxidation-reduction process
L7LQQ1	Putative monolaris	Rhipicephalus pulchellus PE	225	25.5322	9.02686	2	4	7	19	0	23.56	4	4	0	32.44	5	6	0	18.67	2	6	0	0	0	0	0	0	0	0	0	0	0	0	5.33333	0	0	#NUM!	0.026287	F:serine-type endopeptidase inhibitor activity; P:negative regulation of endopeptidase activity
L7LVS9	Uncharacterized protein	Rhipicephalus pulchellus PE	282	31.0243	8.27979	1	3	8	17	1.78667	16.67	3	8	0	0	0	0	0	25.89	5	8	0	0	0	0	0	6.03	1	1	0	0	0	0	5.33333	0.333333	0.0625	-4	0.026287	-
L7M9M8	Putative villin-1	Rhipicephalus pulchellus PE	845	95.1895	6.31592	1	4	18	20	0	4.85	3	3	1.92418	8.17	6	6	0	8.28	4	5	0	0	0	0	0	0	0	0	0	0	0	0	4.66667	0	0	#NUM!	0.026287	F:actin binding; P:cytoskeleton organization
L7MCL3	Putative ubiquitin carboxyl-terminal hydrolase (Fragment)	Rhipicephalus pulchellus PE	1076	116.531	8.74854	1	1	11	20	5.15872	6.69	5	6	1.97059	4.09	4	4	4.10075	4.74	4	5	0	0	0	0	0	0	0	0	0	0	0	0	5	0	0	#NUM!	0.026287	F:ubiquitinyl hydrolase activity; P:ubiquitin-dependent protein catabolic process
L7ME90	Putative pqp secreted protein (Fragment)	Rhipicephalus pulchellus PE	244	25.6129	11.8101	2	5	8	18	0	13.93	3	4	0	18.44	4	5	0	17.62	3	6	0	0	0	0	0	0	0	0	0	0	0	0	5	0	0	#NUM!	0.026287	-
L7MJ69	Putative atp-dependent rna helicase (Fragment)	Rhipicephalus pulchellus PE	532	60.3302	9.31982	1	7	12	21	1.26648	14.29	6	8	0	0	0	0	0	15.79	6	8	0	0	0	0	0	0	0	0	0	0	0	0	5.33333	0	0	#NUM!	0.026287	F:nucleic acid binding; F:helicase activity; F:ATP binding; P:metabolic process
L7MLW8	Putative checkpoint rad17-rfc complex rad17/rad24 component (Fragment)	Rhipicephalus pulchellus PE	520	57.5593	6.16357	1	1	13	18	0	10.96	4	4	0	15.38	5	5	0	23.46	6	6	0	0	0	0	0	0	0	0	0	0	0	0	5	0	0	#NUM!	0.026287	C:nucleus; F:ATP binding; P:DNA repair; P:cell cycle
V5H8I2	Putative intracellular signal transduction (Fragment)	Ixodes ricinus PE	240	27.6055	9.08545	1	1	12	20	0	16.67	4	5	0	28.33	4	4	0	10	4	5	0	0	0	0	0	0	0	0	0	0	0	0	4.66667	0	0	#NUM!	0.026287	C:cytoplasm
V5HMW5	Putative scramblase (Fragment)	Ixodes ricinus PE	302	32.5637	4.89404	2	1	8	23	0	0	0	0	2.11511	14.57	3	8	1.47522	21.52	5	6	0	0	0	0	0	0	0	0	0	0	0	0	4.66667	0	0	#NUM!	0.026287	-
V5HNV9	Putative conserved plasma membrane protein (Fragment)	Ixodes ricinus PE	343	38.4539	9.46631	2	2	9	14	1.62457	9.04	3	3	1.6192	10.2	4	7	0	12.24	3	4	0	0	0	0	0	0	0	0	0	0	0	0	4.66667	0	0	#NUM!	0.026287	-
V5HUE2	Putative sorting nexin isoform 1 protein	Ixodes ricinus PE	493	55.6955	5.59229	2	4	16	20	0	10.55	5	5	1.62638	20.89	7	7	0	7.91	3	3	0	0	0	0	0	0	0	0	0	0	0	0	5	0	0	#NUM!	0.026287	F:phosphatidylinositol binding
V5HZA7	Putative abc transporter c family member (Fragment)	Ixodes ricinus PE	770	84.8375	5.78271	1	3	14	20	0	9.35	5	6	0	4.03	2	2	4.08351	8.31	6	7	0	0	0	0	0	1.17	1	1	0	0	0	0	5	0.333333	0.0666667	-3.90689	0.026287	C:integral component of membrane; F:ATP binding; F:ATPase activity, coupled to transmembrane movement of substances; P:metabolic process; P:transmembrane transport
V5IBR8	Putative rna methylase	Ixodes ricinus PE	267	29.5138	8.33838	6	2	7	14	1.64832	11.61	3	3	0	5.24	2	5	0	25.84	6	6	0	0	0	0	0	0	0	0	0	0	0	0	4.66667	0	0	#NUM!	0.026287	F:nucleic acid binding; F:methyltransferase activity; P:methylation
V5IHV7	Putative dna polymerase eta danio rerio	Ixodes ricinus PE	721	77.7819	8.30908	1	4	20	25	0	0	0	0	0	6.24	5	5	0	16.78	8	9	0	0	0	0	0	0	0	0	0	0	0	0	4.66667	0	0	#NUM!	0.026287	F:damaged DNA binding; F:DNA-directed DNA polymerase activity; P:DNA repair; P:DNA biosynthetic process
A0A023FM87	Putative translation elongation factor	Amblyomma cajennense PE	692	75.9406	6.01123	3	1	15	22	0	0	0	0	0	0	0	0	0	0	0	0	0	10.12	6	6	0	9.25	5	5	1.69235	7.8	5	5	0	5.33333	#DIV/0!	#DIV/0!	0.024423	F:translation elongation factor activity; F:GTPase activity; F:GTP binding; P:translational elongation
A0A023FNF5	Putative serine carboxypeptidase lysosomal cathepsin a	Amblyomma cajennense PE	486	54.2574	6.26514	1	2	9	22	0	0	0	0	0	0	0	0	0	0	0	0	1.75559	12.14	7	8	1.72255	8.02	4	4	1.86626	4.73	3	4	0	5.33333	#DIV/0!	#DIV/0!	0.024423	F:serine-type carboxypeptidase activity; P:proteolysis
A0A023FTK8	Putative larval cuticle protein f1 (Fragment)	Amblyomma cajennense PE	164	19.7268	11.4146	1	7	10	22	0	10.37	1	1	0	0	0	0	0	0	0	0	0	26.83	4	6	0	32.93	4	4	0	14.02	2	5	0.333333	5	15	3.90689	0.024423	-
A0A023G8Q3	Putative histone h1-i-1 ixodes scapularis histone h1-i-1	Amblyomma triste PE	341	36.4585	10.5063	1	3	10	16	0	0	0	0	0	0	0	0	0	0	0	0	0	12.32	4	5	0	25.51	8	9	0	0	0	0	0	4.66667	#DIV/0!	#DIV/0!	0.024423	C:nucleosome; C:nucleus; F:DNA binding; P:nucleosome assembly
A0A023GNU8	Putative long chain fatty acid acyl-coa ligase	Amblyomma triste PE	594	65.3704	6.90283	1	1	8	17	0	0	0	0	0	0	0	0	0	0	0	0	0	7.91	2	4	0	10.1	5	6	0	7.07	3	4	0	4.66667	#DIV/0!	#DIV/0!	0.024423	F:ligase activity; P:metabolic process
B7PCL8	Hydroxysteroid (17-beta) dehydrogenase, putative	Ixodes scapularis GN	347	38.6559	9.20264	1	3	9	20	0	0	0	0	0	0	0	0	0	0	0	0	0	10.09	3	3	1.61206	9.8	3	4	2.06965	15.85	5	7	0	4.66667	#DIV/0!	#DIV/0!	0.024423	F:estradiol 17-beta-dehydrogenase activity; P:oxidation-reduction process
B7PMR5	ABC transporter, putative (Fragment)	Ixodes scapularis GN	572	64.473	7.72314	1	6	13	22	0	0	0	0	0	0	0	0	0	0	0	0	1.86978	12.59	5	6	2.00279	15.73	6	6	0	11.36	3	3	0	5	#DIV/0!	#DIV/0!	0.024423	C:membrane; F:ATP binding; F:organic phosphonate transmembrane-transporting ATPase activity; P:metabolic process; P:organic phosphonate transport; P:organophosphate ester transport
B7PWE6	Endopeptidase cystein protease, putative (Fragment)	Ixodes scapularis GN	135	15.3108	9.72998	1	1	7	14	0	0	0	0	0	0	0	0	0	0	0	0	0	0	0	0	0	21.48	3	7	1.63418	30.37	6	7	0	4.66667	#DIV/0!	#DIV/0!	0.024423	C:GPI-anchor transamidase complex; F:GPI-anchor transamidase activity; F:peptidase activity; P:proteolysis; P:attachment of GPI anchor to protein
B7Q9A9	Dendritic cell-specific transmembrane protein, putative (Fragment)	Ixodes scapularis GN	563	63.5765	9.5835	1	1	15	21	0	0	0	0	0	0	0	0	0	0	0	0	0	19.36	6	6	3.61965	19.72	7	8	0	0	0	0	0	4.66667	#DIV/0!	#DIV/0!	0.024423	C:integral component of membrane
B7QBR7	Arginase, putative	Ixodes scapularis GN	369	40.2465	5.30029	1	3	10	18	0	0	0	0	0	0	0	0	0	4.07	1	1	1.69995	11.38	3	3	1.74866	17.62	5	6	0	17.07	6	6	0.333333	5	15	3.90689	0.024423	F:arginase activity; F:metal ion binding; P:urea cycle; P:arginine metabolic process
B7QBZ3	Putative uncharacterized protein (Fragment)	Ixodes scapularis GN	697	78.0235	6.87354	1	1	8	14	0	0	0	0	0	0	0	0	0	0	0	0	1.46237	8.46	5	5	1.24453	6.74	4	5	0	6.89	4	4	0	4.66667	#DIV/0!	#DIV/0!	0.024423	-
B7QLT6	Putative uncharacterized protein (Fragment)	Ixodes scapularis GN	149	16.2485	11.561	1	3	10	19	0	0	0	0	0	0	0	0	0	0	0	0	0	23.49	3	4	3.76502	31.54	4	5	0	44.3	6	6	0	5	#DIV/0!	#DIV/0!	0.024423	-
G3MGJ7	Putative uncharacterized protein (Fragment)	Amblyomma maculatum PE	238	26.3568	9.37842	1	3	7	21	0	0	0	0	0	0	0	0	0	0	0	0	0	9.66	3	3	0	31.09	4	5	1.60945	20.59	4	6	0	4.66667	#DIV/0!	#DIV/0!	0.024423	-
G3MHP4	Putative uncharacterized protein (Fragment)	Amblyomma maculatum PE	801	88.1548	9.39307	2	1	12	21	0	0	0	0	0	0	0	0	0	0	0	0	0	0	0	0	1.90049	6.24	5	7	0	6.12	5	8	0	5	#DIV/0!	#DIV/0!	0.024423	C:integral component of membrane; F:cation transmembrane transporter activity; P:cation transmembrane transport
G3MQL5	Putative uncharacterized protein	Amblyomma maculatum PE	508	56.2958	6.15088	1	1	10	19	0	0	0	0	0	0	0	0	0	0	0	0	0	6.69	3	3	0	16.14	8	9	0	6.1	3	3	0	5	#DIV/0!	#DIV/0!	0.024423	F:metalloendopeptidase activity; F:zinc ion binding; P:proteolysis
L7LQB2	Putative bilaris	Rhipicephalus pulchellus PE	192	22.0607	9.5249	2	1	8	19	0	0	0	0	0	0	0	0	0	0	0	0	0	21.88	5	7	0	24.48	4	6	0	18.23	2	2	0	5	#DIV/0!	#DIV/0!	0.024423	F:serine-type endopeptidase inhibitor activity; P:negative regulation of endopeptidase activity
L7LZH4	Uncharacterized protein	Rhipicephalus pulchellus PE	165	17.6143	8.29443	1	3	6	16	0	0	0	0	0	0	0	0	0	0	0	0	0	0	0	0	0	27.88	5	10	0	24.85	3	6	0	5.33333	#DIV/0!	#DIV/0!	0.024423	-
L7M663	Uncharacterized protein	Rhipicephalus pulchellus PE	879	93.9085	7.13721	1	3	13	16	0	0	0	0	0	0	0	0	0	0	0	0	0	8.65	6	6	0	8.3	4	4	0	4.78	4	4	0	4.66667	#DIV/0!	#DIV/0!	0.024423	-
V5GW41	Putative rna polymerase ii subunit a c-terminal protein (Fragment)	Ixodes ricinus PE	932	101.472	4.99561	1	4	16	20	0	1.39	1	1	0	0	0	0	0	0	0	0	0	7.08	5	5	0	4.94	3	3	0	8.37	5	6	0.333333	4.66667	14	3.80735	0.024423	C:nucleus; F:phosphoprotein phosphatase activity; P:protein dephosphorylation
V5GX98	Putative vacuolar h + atpase subunit	Ixodes ricinus PE	257	29.0688	10.0229	4	2	10	22	0	0	0	0	0	0	0	0	0	0	0	0	3.41154	8.17	3	4	1.56308	11.28	4	6	2.14091	20.23	5	5	0	5	#DIV/0!	#DIV/0!	0.024423	F:ATPase activity, coupled to transmembrane movement of substances; P:transmembrane transport
L7LWP9	Putative myosin class i heavy chain	Rhipicephalus pulchellus PE	599	69.3028	9.31982	1	2	19	40	7.97406	11.69	5	8	8.4634	18.86	8	9	9.10685	13.86	6	12	0	0	0	0	1.65586	6.01	3	3	0	4.01	2	2	9.66667	1.66667	0.172414	-2.53605	0.022163	C:myosin complex; F:motor activity; F:ATP binding; P:metabolic process
L7MMV9	Uncharacterized protein (Fragment)	Rhipicephalus pulchellus PE	706	78.5994	7.75244	1	3	22	42	0	25.64	12	14	2.07845	10.76	6	7	0	17.14	9	9	0	3.97	2	2	2.4219	9.21	4	5	0	0	0	0	10	2.33333	0.233333	-2.09954	0.022163	-
A0A023FMG5	Putative actin-binding cytoskeleton protein filamin (Fragment)	Amblyomma cajennense PE	1119	120.918	7.50342	1	6	32	55	1.98075	8.4	9	10	3.88303	12.24	12	15	1.61722	14.57	10	10	0	3.04	4	4	0	0	0	0	1.7147	6.08	5	5	11.6667	3	0.257143	-1.95936	0.021483	F:actin filament binding
L7MEG0	Putative heat shock protein (Fragment)	Rhipicephalus pulchellus PE	763	87.4861	5.13525	10	4	49	251	53.5832	29.75	23	25	17.097	16.25	10	14	59.4241	25.69	22	30	93.8326	26.61	24	45	73.3959	33.81	29	39	76.4617	28.44	25	39	23	41	1.78261	0.83399	0.021344	F:ATP binding; F:unfolded protein binding; P:protein folding; P:response to stress
B7PX29	Transposable element Uhu, putative	Ixodes scapularis GN	248	27.4343	9.26123	1	3	13	32	0	12.1	4	6	1.71565	22.18	6	8	1.61912	29.03	8	9	0	0	0	0	0	12.1	2	2	0	0	0	0	7.66667	0.666667	0.0869565	-3.52356	0.020645	F:DNA binding; F:transposase activity; P:transposition, DNA-mediated; P:DNA integration
B7PYW4	Putative uncharacterized protein	Ixodes scapularis GN	53	5.60747	4.22119	1	1	2	29	1.60387	16.98	1	1	1.63339	16.98	1	1	0	47.17	2	23	0	0	0	0	1.63087	47.17	2	3	0	0	0	0	8.33333	1	0.12	-3.05889	0.020645	-
V5HJB9	Uncharacterized protein (Fragment)	Ixodes ricinus PE	251	29.078	6.55127	1	1	10	33	0	10.76	3	5	0	19.92	4	5	6.21038	15.14	3	13	2.50753	19.12	3	4	0	0	0	0	0	0	0	0	7.66667	1.33333	0.173913	-2.52356	0.020645	-
V9MMB3	NADH-ubiquinone oxidoreductase chain 2	Rhipicephalus geigyi GN	318	38.3211	9.90576	1	5	9	28	0	12.58	4	18	1.60559	19.5	3	3	1.62655	20.75	4	4	0	0	0	0	0	13.84	2	3	0	0	0	0	8.33333	1	0.12	-3.05889	0.020645	C:mitochondrial inner membrane; C:integral component of membrane; C:respiratory chain; F:NADH dehydrogenase (ubiquinone) activity; P:mitochondrial electron transport, NADH to ubiquinone
Q6X4W3	Actin	Haemaphysalis longicornis GN	376	41.7977	5.47803	4	2	32	688	201.677	78.19	25	109	230.676	70.21	23	106	204.831	59.31	19	97	155.772	54.52	16	67	162.192	57.71	21	74	177.898	64.89	20	76	104	72.3333	0.695513	-0.523851	0.019798	F:ATP binding
A0A023FS93	Glutamine synthetase (Fragment)	Amblyomma cajennense PE	452	50.2386	8.63135	1	3	15	56	4.20444	3.32	2	2	3.97103	7.3	3	5	0	0	0	0	3.84426	20.35	9	13	7.79585	20.13	8	11	5.66385	14.16	6	7	2.33333	10.3333	4.42857	2.14684	0.019718	F:glutamate-ammonia ligase activity; F:ATP binding; P:glutamine biosynthetic process
L7M1S0	Putative tick transposon	Rhipicephalus pulchellus PE	568	64.9889	8.79248	1	11	26	50	2.02707	4.75	2	2	0	4.23	2	4	0	2.46	1	1	1.6348	18.13	9	10	0	18.31	10	10	2.21108	19.54	11	11	2.33333	10.3333	4.42857	2.14684	0.019718	-
M9WB33	Heat shock protein 90	Ornithodoros moubata PE	563	65.6942	5.09717	10	3	42	242	51.1227	30.37	20	23	17.3108	16.87	8	13	64.8862	30.37	21	30	93.19	39.96	24	46	74.0914	38.01	24	34	79.7111	36.59	25	39	22	39.6667	1.80303	0.850424	0.019437	F:ATP binding; F:unfolded protein binding; P:protein folding; P:response to stress
A0A023GFT2	Putative pre-mrna-splicing factor cwc22	Amblyomma triste PE	773	89.2015	6.354	1	2	21	35	0	5.17	4	4	0	0	0	0	0	0	0	0	0	8.54	7	8	2.20167	13.58	9	9	0	9.83	6	6	1.33333	7.66667	5.75	2.52356	0.018643	F:RNA binding
B7PAU5	Prominin protein, putative	Ixodes scapularis GN	690	75.049	6.03662	1	2	14	31	0	6.67	3	4	0	0	0	0	0	0	0	0	0	10.14	4	8	1.64392	12.17	7	9	0	13.19	6	6	1.33333	7.66667	5.75	2.52356	0.018643	C:integral component of membrane
B7Q4G5	Putative uncharacterized protein	Ixodes scapularis GN	1107	126.075	6.88818	1	10	25	40	0	0	0	0	0	0	0	0	0	4.34	4	4	0	10.03	8	9	1.70641	11.92	10	11	2.95121	4.07	3	4	1.33333	8	6	2.58496	0.018643	-
L7LUI4	Putative macro domain protein	Rhipicephalus pulchellus PE	526	60.2822	8.35303	2	5	20	33	0	0	0	0	0	0	0	0	0	6.84	3	3	0	15.59	8	10	2.20175	9.7	4	4	0	23	8	9	1	7.66667	7.66667	2.9386	0.018643	-
L7M846	Putative dna helicase tbp-interacting protein	Rhipicephalus pulchellus PE	463	51.4366	5.8208	11	5	18	37	0	11.88	4	4	0	0	0	0	0	0	0	0	0	8.21	4	6	0	13.17	6	6	5.88657	13.82	8	11	1.33333	7.66667	5.75	2.52356	0.018643	F:ATP binding; F:ATP-dependent 5'-3' DNA helicase activity; P:metabolic process; P:DNA duplex unwinding
L7MFY9	Putative ataxin-7 (Fragment)	Rhipicephalus pulchellus PE	1009	102.904	10.0815	1	14	19	31	0	0	0	0	0	0	0	0	0	3.87	2	2	1.88572	9.02	9	11	0	7.83	8	9	0	3.07	3	3	0.666667	7.66667	11.5	3.52356	0.018643	-
V5GXH4	Anoctamin (Fragment)	Ixodes ricinus PE	676	76.6583	7.50342	6	4	12	30	0	0	0	0	1.79708	2.51	3	4	0	0	0	0	4.70153	10.5	5	11	0	10.06	7	7	4.93978	7.84	4	7	1.33333	8.33333	6.25	2.64386	0.018643	C:integral component of membrane
V5HAS9	Uncharacterized protein (Fragment)	Ixodes ricinus PE	668	74.0527	8.49951	1	3	39	74	0	0	0	0	0	0	0	0	0	18.11	11	11	0	13.62	9	11	0	27.54	14	15	2.00338	22.16	11	17	3.66667	14.3333	3.90909	1.96683	0.01711	-
V5H937	Putative aspartyl/asparaginyl-trna synthetase translation	Ixodes ricinus PE	487	54.3044	6.80029	2	3	12	85	3.0239	1.23	1	5	0	0	0	0	5.56573	1.23	1	9	19.0185	13.55	5	18	15.3556	12.11	5	17	15.4804	4.31	2	13	4.66667	16	3.42857	1.77761	0.015102	C:cytoplasm; F:nucleic acid binding; F:asparagine-tRNA ligase activity; F:ATP binding; P:asparaginyl-tRNA aminoacylation
A0A023FWU0	Putative mitochondrial phosphate carrier protein	Amblyomma parvum PE	357	39.3593	9.14404	3	1	12	19	6.22661	30.81	8	9	4.58384	18.77	5	5	7.37097	13.45	4	4	0	0	0	0	0	0	0	0	0	0	0	0	6	0	0	#NUM!	0.014932	C:integral component of membrane; P:transmembrane transport
B7P3I2	PlekhH1, putative (Fragment)	Ixodes scapularis GN	819	92.7725	8.90967	1	5	15	23	3.85736	6.47	5	5	0	7.57	5	6	1.56396	10.38	7	8	0	0	0	0	0	0	0	0	0	0	0	0	6.33333	0	0	#NUM!	0.014932	C:cytoskeleton; F:sterol 3-beta-glucosyltransferase activity; P:metabolic process
B7PE28	Oxysterol-binding protein 3, putative (Fragment)	Ixodes scapularis GN	778	87.6465	7.23975	3	1	11	26	0	8.48	4	5	0	5.14	3	4	0	14.65	5	8	0	0	0	0	0	0	0	0	0	0	0	0	5.66667	0	0	#NUM!	0.014932	-
B7PHG4	Putative uncharacterized protein	Ixodes scapularis GN	1390	147.768	5.8335	3	4	20	26	0	4.68	4	5	0	6.98	7	9	0	5.61	5	5	0	0	0	0	0	0	0	0	0	0	0	0	6.33333	0	0	#NUM!	0.014932	-
G3MPN0	Putative uncharacterized protein	Amblyomma maculatum PE	604	66.6917	7.12256	1	1	14	21	0	10.76	4	5	2.04476	8.94	5	6	3.66793	17.88	7	7	0	0	0	0	0	0	0	0	0	1.66	1	1	6	0.333333	0.0555556	-4.16993	0.014932	C:nucleus; F:DNA binding; P:DNA replication; P:DNA repair; P:DNA recombination
L7M136	Beta-galactosidase	Rhipicephalus pulchellus PE	642	72.5888	5.77002	1	1	8	20	0	10.9	3	4	0	0	0	0	0	10.12	4	13	0	0	0	0	0	0	0	0	0	0	0	0	5.66667	0	0	#NUM!	0.014932	F:beta-galactosidase activity; P:carbohydrate metabolic process
L7ME37	Putative membrane trafficking and cell signaling protein hrs (Fragment)	Rhipicephalus pulchellus PE	425	47.4702	5.5542	1	1	16	18	1.60845	7.06	4	4	3.05751	20.71	8	8	1.94435	16	6	6	0	0	0	0	0	0	0	0	0	0	0	0	6	0	0	#NUM!	0.014932	F:metal ion binding
L7MGT5	Uncharacterized protein (Fragment)	Rhipicephalus pulchellus PE	182	19.3372	8.30908	1	4	5	17	0	32.97	3	6	0	43.41	4	6	0	32.97	3	5	0	0	0	0	0	0	0	0	0	0	0	0	5.66667	0	0	#NUM!	0.014932	F:zinc ion binding
V5GLG2	Putative serine/threonine protein kinase	Ixodes ricinus PE	652	73.9428	8.26514	2	3	18	24	0	7.36	4	4	2.17365	12.12	5	6	1.60659	16.56	7	7	0	0	0	0	0	0	0	0	0	0	0	0	5.66667	0	0	#NUM!	0.014932	F:protein serine/threonine kinase activity; F:ATP binding; F:phosphatidylinositol binding; P:protein phosphorylation
A0A023GNH4	Putative multiple epidermal growth factor-like protein 10 (Fragment)	Amblyomma triste PE	665	70.9049	6.7124	1	7	15	23	0	0	0	0	0	0	0	0	0	0	0	0	3.25389	8.87	7	8	0	13.08	6	6	0	9.92	5	5	0	6.33333	#DIV/0!	#DIV/0!	0.013693	-
B7P954	Neprilysin, putative	Ixodes scapularis GN	741	83.6284	8.77783	1	13	24	28	0	0	0	0	0	0	0	0	0	0	0	0	0	9.99	6	6	0	11.61	5	5	0	10.39	6	6	0	5.66667	#DIV/0!	#DIV/0!	0.013693	F:metalloendopeptidase activity; P:proteolysis
B7P9M3	Putative uncharacterized protein (Fragment)	Ixodes scapularis GN	225	25.0083	10.4624	1	4	7	18	0	0	0	0	0	0	0	0	0	0	0	0	0	0	0	0	0	23.56	5	10	1.94545	17.78	4	8	0	6	#DIV/0!	#DIV/0!	0.013693	C:kinesin complex; C:microtubule; F:microtubule motor activity; F:ATP binding; F:microtubule binding; P:microtubule-based movement; P:metabolic process
B7PVU5	Dihydroxyacetone kinase, putative (Fragment)	Ixodes scapularis GN	427	45.8572	5.71924	1	2	12	21	0	0	0	0	0	0	0	0	0	0	0	0	1.87495	15.93	6	6	1.65932	10.77	4	5	0	18.97	5	8	0	6.33333	#DIV/0!	#DIV/0!	0.013693	F:glycerone kinase activity; P:glycerol metabolic process; P:phosphorylation
B7PY45	Low-density lipoprotein receptor, putative	Ixodes scapularis GN	630	70.4396	6.32861	1	8	16	22	0	0	0	0	0	0	0	0	0	0	0	0	0	10.79	6	7	0	6.51	4	4	2.00275	12.54	5	7	0	6	#DIV/0!	#DIV/0!	0.013693	C:membrane
B7QLX1	Putative uncharacterized protein (Fragment)	Ixodes scapularis GN	272	29.0955	9.18799	1	1	13	36	0	0	0	0	0	0	0	0	0	0	0	0	0	0	0	0	0	10.29	4	7	1.82007	13.24	4	10	0	5.66667	#DIV/0!	#DIV/0!	0.013693	F:zinc ion binding
L7M9B6	Putative isoleucyl-trna synthetase	Rhipicephalus pulchellus PE	1185	135.606	7.57666	1	4	33	40	0	0	0	0	0	0	0	0	0	0	0	0	0	4.64	3	3	1.75514	4.98	5	6	1.69391	8.27	8	9	0	6	#DIV/0!	#DIV/0!	0.013693	C:cytoplasm; F:aminoacyl-tRNA editing activity; F:isoleucine-tRNA ligase activity; F:ATP binding; P:isoleucyl-tRNA aminoacylation; P:regulation of translational fidelity
L7MJI0	Putative bud13 (Fragment)	Rhipicephalus pulchellus PE	666	75.1211	9.68604	1	14	23	32	0	0	0	0	0	0	0	0	0	0	0	0	0	12.16	8	8	3.23282	6.46	5	5	2.10785	12.76	6	6	0	6.33333	#DIV/0!	#DIV/0!	0.013693	-
V5H7E0	Putative recq4 protein	Ixodes ricinus PE	1234	137.198	8.5874	2	4	21	29	0	0	0	0	0	0	0	0	0	0	0	0	3.2515	5.43	5	7	0	2.67	4	4	2.01068	8.43	7	7	0	6	#DIV/0!	#DIV/0!	0.013693	F:nucleic acid binding; F:helicase activity; F:ATP binding; F:zinc ion binding; P:metabolic process
V5I160	Putative 26s proteasome regulatory complex subunit rpn2/psmd1 (Fragment)	Ixodes ricinus PE	1034	112.659	5.13525	2	1	14	18	0	0	0	0	0	0	0	0	0	0	0	0	0	3.48	4	4	0	12.38	9	9	2.01445	7.74	5	5	0	6	#DIV/0!	#DIV/0!	0.013693	C:proteasome complex; F:enzyme regulator activity; P:regulation of protein catabolic process; P:regulation of catalytic activity
V5II00	Putative tumor necrosis factor-mediated signaling pathway (Fragment)	Ixodes ricinus PE	344	39.124	8.04541	1	3	12	20	0	0	0	0	0	0	0	0	0	0	0	0	0	22.67	5	6	0	19.19	4	4	0	24.13	6	8	0	6	#DIV/0!	#DIV/0!	0.013693	F:ubiquitin-protein transferase activity; F:zinc ion binding; P:protein ubiquitination
V5H5Q3	Putative secreted protein (Fragment)	Ixodes ricinus PE	115	13.1941	8.44092	1	3	4	62	0	0	0	0	3.35454	28.7	3	35	2.01601	18.26	2	9	0	0	0	0	0	18.26	2	7	1.6274	23.48	2	6	14.6667	4.33333	0.295455	-1.75899	0.012554	-
L7MKH4	Uncharacterized protein (Fragment)	Rhipicephalus pulchellus PE	965	108.856	9.11475	3	4	21	40	3.75802	8.5	7	8	3.04405	11.19	9	10	0	8.39	6	8	0	0	0	0	0	0	0	0	1.77615	3.11	3	3	8.66667	1	0.115385	-3.11548	0.012077	F:nucleotide binding; F:RNA binding; P:RNA processing
V5HP54	Uncharacterized protein	Ixodes ricinus PE	497	55.653	5.88428	3	4	8	32	0	9.66	3	5	0	9.46	3	22	0	0	0	0	0	4.02	1	1	0	0	0	0	0	5.43	2	2	9	1	0.111111	-3.16993	0.012077	-
V5HR10	Uncharacterized protein (Fragment)	Ixodes ricinus PE	170	19.3557	9.75928	2	1	3	34	2.05551	13.53	1	8	4.17015	13.53	1	3	0	38.24	3	16	0	13.53	1	2	0	13.53	1	1	2.22815	13.53	1	1	9	1.33333	0.148148	-2.75489	0.012077	-
L7LSN6	Putative eukaryotic translation initiation factor 3 subunit 10	Rhipicephalus pulchellus PE	1085	116.798	6.72705	1	9	24	52	1.64714	4.33	3	4	0	0	0	0	0	5.62	3	3	3.3934	11.52	7	11	5.30072	8.76	6	7	1.96561	16.22	10	15	2.33333	11	4.71429	2.23704	0.011757	F:translation initiation factor activity; P:translational initiation
L7M9D1	Putative erythrocyte membrane protein band 4.1-like 3	Rhipicephalus pulchellus PE	1107	119.819	9.15869	2	11	27	50	0	3.79	2	2	3.3232	4.52	4	5	0	0	0	0	2.1202	8.31	9	11	7.03861	11.38	11	15	0	8.22	7	8	2.33333	11.3333	4.85714	2.28011	0.011757	C:cytoplasm; C:cytoskeleton; C:extrinsic component of membrane; F:actin binding; F:structural molecule activity
A0A023G8T6	Putative mitochondrial oxaloacetate carrier protein (Fragment)	Amblyomma triste PE	372	41.0673	10.0522	1	2	15	112	0	16.4	3	10	0	8.33	3	35	0	6.99	3	22	0	0	0	0	1.23226	13.71	5	12	0	7.26	3	13	22.3333	8.33333	0.373134	-1.42223	0.01168	C:integral component of membrane; P:transport
L7M6S2	Putative e3 ubiquitin ligase	Rhipicephalus pulchellus PE	982	109.566	6.26514	1	15	26	63	2.0266	4.89	4	5	0	0	0	0	2.1644	5.6	4	4	4.19754	2.95	3	5	6.70196	13.85	14	19	8.16425	8.15	7	15	3	13	4.33333	2.11548	0.011545	F:ubiquitin-protein transferase activity; F:zinc ion binding; F:ligase activity; P:protein ubiquitination
B7PT11	LIN-12 protein, putative	Ixodes scapularis GN	2298	245.81	5.07178	1	14	30	44	2.16182	2.05	3	4	0	0	0	0	0	0	0	0	0	4.05	8	10	0	7.75	10	11	1.68917	1.91	5	6	1.33333	9	6.75	2.75489	0.010768	C:integral component of membrane; F:phospholipase A2 activity; F:calcium ion binding; P:Notch signaling pathway; P:multicellular organismal development; P:metabolic process; P:cell differentiation
V5HXB2	Putative lipocal-1 12 lipocalin (Fragment)	Ixodes ricinus PE	151	17.6197	8.32373	1	1	4	42	1.60793	6.62	2	3	0	0	0	0	0	0	0	0	6.91994	11.26	2	11	8.3072	5.96	2	10	5.6573	3.97	1	7	1	9.33333	9.33333	3.22239	0.010768	-
V5I102	Putative brpk/pten-induced protein kinase (Fragment)	Ixodes ricinus PE	322	35.0913	9.05615	2	5	8	42	0	0	0	0	0	0	0	0	0	15.53	4	4	2.2323	4.97	2	9	0	11.49	3	12	0	6.21	2	7	1.33333	9.33333	7	2.80735	0.010768	F:protein kinase activity; F:ATP binding; P:protein phosphorylation
B7PAR6	Heat shock protein, putative	Ixodes scapularis GN	648	71.1207	5.5415	2	13	51	439	132.626	58.02	33	61	35.6964	20.83	12	15	113.84	51.39	29	56	190.186	55.56	32	81	136.923	53.24	29	65	147.024	51.23	35	68	44	71.3333	1.62121	0.697073	0.009657	F:ATP binding; F:2-alkenal reductase [NAD(P)] activity; P:oxidation-reduction process
A0A023FK74	Uncharacterized protein (Fragment)	Amblyomma cajennense PE	619	67.0039	7.13721	2	8	13	25	0	17.93	6	9	0	23.26	7	8	0	8.4	3	5	0	0	0	0	0	0	0	0	0	0	0	0	7.33333	0	0	#NUM!	0.008562	-
A0A023FP11	Uncharacterized protein	Amblyomma cajennense PE	278	30.6942	8.76318	2	2	5	22	0	0	0	0	0	15.11	4	15	2.05133	11.51	4	7	0	0	0	0	0	0	0	0	0	0	0	0	7.33333	0	0	#NUM!	0.008562	P:ubiquinone biosynthetic process
B7P0P3	85 kD calcium-independent phospholipase A2, putative (Fragment)	Ixodes scapularis GN	722	79.8619	8.1626	1	3	18	30	1.99068	9.14	6	6	0	9.83	6	7	1.61541	13.16	7	9	0	0	0	0	0	0	0	0	0	0	0	0	7.33333	0	0	#NUM!	0.008562	F:phospholipase A2 activity; P:lipid metabolic process
B7PUK7	Phosphoenolpyruvate carboxylase, putative (Fragment)	Ixodes scapularis GN	192	22.1568	9.39307	1	1	6	35	3.02995	21.88	3	7	1.80311	5.21	1	6	2.65012	27.6	3	8	0	0	0	0	0	0	0	0	0	0	0	0	7	0	0	#NUM!	0.008562	F:phosphoenolpyruvate carboxylase activity; P:tricarboxylic acid cycle; P:carbon fixation
L7MFR5	Putative nuclear receptor hormone receptor in 78-like protein (Fragment)	Rhipicephalus pulchellus PE	463	50.1952	7.48877	1	6	13	22	0	12.1	4	4	0	14.25	6	8	0	14.69	5	8	0	0	0	0	0	0	0	0	0	0	0	0	6.66667	0	0	#NUM!	0.008562	C:nucleus; F:transcription factor activity, sequence-specific DNA binding; F:steroid hormone receptor activity; F:zinc ion binding; F:sequence-specific DNA binding; P:transcription, DNA-templated; P:regulation of transcription, DNA-templated; P:steroid hormone mediated signaling pathway
V5HJ71	Putative nonsense mediated mrna decay factor (Fragment)	Ixodes ricinus PE	894	97.8763	7.06396	3	1	17	25	0	11.07	6	7	1.27792	4.03	3	5	1.73395	10.51	8	8	0	0	0	0	0	0	0	0	0	0	0	0	6.66667	0	0	#NUM!	0.008562	-
B7PHI0	Putative uncharacterized protein	Ixodes scapularis GN	430	47.3982	5.52881	1	9	14	32	0	0	0	0	0	0	0	0	0	0	0	0	0	17.21	7	10	0	11.86	5	6	0	14.65	5	5	0	7	#DIV/0!	#DIV/0!	0.00775	-
G3MMX0	Histone H4	Amblyomma maculatum PE	138	15.4225	11.2681	5	2	16	68	11.2377	37.68	6	8	18.3533	62.32	9	28	17.0693	62.32	9	14	2.81983	26.81	4	4	4.57477	13.04	2	2	4.22411	26.81	5	5	16.6667	3.66667	0.22	-2.18442	0.004984	C:nucleosome; C:nucleus; F:DNA binding; F:protein heterodimerization activity; P:nucleosome assembly
Q6B8A9	Putative uncharacterized protein	Ixodes pacificus PE	66	7.27482	11.6489	1	1	3	41	4.26566	57.58	3	6	7.38862	34.85	1	5	18.708	34.85	1	13	0	0	0	0	2.62387	34.85	1	1	0	0	0	0	8	0.333333	0.0416667	-4.58496	0.004945	-
B7PEN4	Heat shock protein, putative	Ixodes scapularis GN	658	72.5496	5.46533	1	20	50	407	115.544	48.18	30	51	32.7862	20.52	11	13	100.199	46.81	29	50	159.679	45.44	29	69	131.735	48.18	29	60	154.217	50.76	31	69	38	66	1.73684	0.796467	0.004918	F:ATP binding; F:2-alkenal reductase [NAD(P)] activity; P:oxidation-reduction process
B7P880	Inositol polyphosphate multikinase, putative	Ixodes scapularis GN	278	31.8644	8.55811	1	3	10	63	0	0	0	0	1.65181	11.87	3	30	0	15.11	4	10	0	0	0	0	0	9.71	3	6	0	0	0	0	13.3333	2	0.15	-2.73697	0.004865	F:inositol-1,4,5-trisphosphate 6-kinase activity; F:inositol-1,4,5-trisphosphate 3-kinase activity; P:phosphorylation
G4WSC2	Bm86-like protein (Fragment)	Hyalomma marginatum marginatum PE	616	67.4142	5.74463	1	5	23	28	0	0	0	0	0	0	0	0	0	0	0	0	0	19.97	9	10	2.36505	18.67	9	10	0	15.58	4	4	0	8	#DIV/0!	#DIV/0!	0.004419	-
B7QI01	Hsp90 protein, putative	Ixodes scapularis GN	731	84.2254	5.03369	10	13	62	343	75.3362	43.64	31	34	18.9778	16.42	10	15	87.3425	40.36	32	41	125.366	38.3	34	60	100.05	44.73	37	51	120.255	46.1	39	57	30	56	1.86667	0.900464	0.00418	F:ATP binding; F:unfolded protein binding; P:protein folding; P:response to stress
V5IE65	Uncharacterized protein (Fragment)	Ixodes ricinus PE	343	36.829	10.0815	1	3	11	87	1.20435	4.96	2	6	19.917	14.87	3	40	3.06134	14.29	4	15	0	0	0	0	0	7.87	3	8	1.45191	7.87	2	7	20.3333	5	0.245902	-2.02385	0.002991	-
L7MJN0	Putative syntaxin-binding protein 2 (Fragment)	Rhipicephalus pulchellus PE	173	19.1699	8.60205	1	8	25	91	0	46.24	6	10	0	0	0	0	0	42.2	5	6	2.07261	52.02	7	17	0	63.58	9	24	0	56.07	10	20	5.33333	20.3333	3.8125	1.93074	0.002427	-
L7MG34	Putative atp-dependent rna helicase (Fragment)	Rhipicephalus pulchellus PE	2105	233.505	5.94775	2	5	30	45	0	0	0	0	0	0	0	0	0	0	0	0	2.03078	4.85	6	7	0	6.98	9	12	0	5.37	9	11	0	10	#DIV/0!	#DIV/0!	0.001459	F:nucleic acid binding; F:helicase activity; F:ATP binding; P:metabolic process
B7PU57	Putative uncharacterized protein	Ixodes scapularis GN	145	15.725	11.2388	1	1	6	47	0	0	0	0	0	22.07	4	32	1.62214	16.55	2	8	0	0	0	0	0	0	0	0	0	21.38	3	4	13.3333	1.33333	0.1	-3.32193	0.001454	-
V9NJJ9	Vitellogenin 2	Amblyomma hebraeum GN	1926	217.368	7.23975	1	9	27	169	1.6217	2.18	4	15	1.62692	2.44	4	48	0	3.12	6	37	2.13204	6.75	9	19	0	0	0	0	0	1.51	3	15	33.3333	11.3333	0.34	-1.55639	0.001055	F:lipid transporter activity; P:lipid transport
L7M6Z6	Putative glutamate carboxypeptidase	Rhipicephalus pulchellus PE	813	89.1036	5.68115	2	1	5	45	0	0	0	0	0	4.55	3	35	0	0	0	0	0	0	0	0	0	0	0	0	0	0	0	0	11.6667	0	0	#NUM!	0.000577	F:carboxypeptidase activity; P:proteolysis
A0A023FB46	Putative secreted protein	Amblyomma cajennense PE	72	8.0633	8.5874	1	2	3	17	0	20.83	1	1	0	48.61	2	3	0	33.33	2	2	0	48.61	2	4	0	0	0	0	0	48.61	2	6	2	3.33333	1.66667	0.736966	≥ 0.05	-
A0A023FB80	Uncharacterized protein	Amblyomma cajennense PE	71	8.09841	8.44092	1	3	3	6	0	0	0	0	0	0	0	0	0	0	0	0	0	23.94	1	1	0	57.75	2	2	2.12978	23.94	1	1	0	1.33333	#DIV/0!	#DIV/0!	≥ 0.05	-
A0A023FBI7	Putative secreted protein	Amblyomma cajennense PE	93	10.5214	8.71924	1	1	5	10	0	34.41	3	4	0	54.84	3	4	2.14199	20.43	1	2	0	0	0	0	0	0	0	0	0	0	0	0	3.33333	0	0	#NUM!	≥ 0.05	-
A0A023FBL0	Putative secreted protein	Amblyomma cajennense PE	98	11.0438	11.7661	1	2	4	17	0	0	0	0	2.04024	25.51	2	6	0	25.51	2	3	1.81224	22.45	2	5	0	0	0	0	0	0	0	0	3	1.66667	0.555556	-0.847997	≥ 0.05	-
A0A023FBP0	Putative secreted protein	Amblyomma cajennense PE	105	12.0669	6.7417	1	1	2	2	0	0	0	0	0	0	0	0	0	0	0	0	0	0	0	0	0	0	0	0	2.10331	20	2	2	0	0.666667	#DIV/0!	#DIV/0!	≥ 0.05	-
A0A023FBR8	Uncharacterized protein	Amblyomma cajennense PE	107	12.5237	9.42236	1	1	3	3	0	0	0	0	0	20.56	3	3	0	0	0	0	0	0	0	0	0	0	0	0	0	0	0	0	1	0	0	#NUM!	≥ 0.05	-
A0A023FBS5	Putative 28s ribosomal protein s36 mitochondrial (Fragment)	Amblyomma cajennense PE	109	11.3289	10.9751	1	2	3	23	0	29.36	2	5	0	9.17	1	6	1.69181	9.17	1	3	0	0	0	0	0	0	0	0	0	27.52	2	4	4.66667	1.33333	0.285714	-1.80735	≥ 0.05	C:ribosome
A0A023FBW3	Putative secreted protein	Amblyomma cajennense PE	118	13.3928	8.89502	1	2	2	4	0	0	0	0	0	0	0	0	0	0	0	0	0	0	0	0	0	36.44	2	3	0	0	0	0	0	1	#DIV/0!	#DIV/0!	≥ 0.05	-
A0A023FBW9	Putative secreted mucin	Amblyomma cajennense PE	123	14.0526	4.53857	1	2	2	4	0	0	0	0	0	0	0	0	0	0	0	0	1.63974	8.94	1	1	1.70961	14.63	2	2	1.63295	8.94	1	1	0	1.33333	#DIV/0!	#DIV/0!	≥ 0.05	-
A0A023FBX5	Putative secreted protein	Amblyomma cajennense PE	122	13.4004	7.95752	1	2	3	4	0	0	0	0	0	9.84	1	1	0	0	0	0	0	0	0	0	0	0	0	0	0	40.16	3	3	0.333333	1	3	1.58496	≥ 0.05	-
A0A023FBY7	Putative cathepsin l-like cysteine proteinase a	Amblyomma cajennense PE	128	14.2305	9.78857	1	2	4	4	0	47.66	3	3	0	0	0	0	0	9.38	1	1	0	0	0	0	0	0	0	0	0	0	0	0	1.33333	0	0	#NUM!	≥ 0.05	F:cysteine-type peptidase activity; P:proteolysis
A0A023FBY8	Putative secreted protein	Amblyomma cajennense PE	105	12.1524	11.356	2	3	3	4	0	0	0	0	0	0	0	0	0	0	0	0	0	49.52	3	4	0	0	0	0	0	0	0	0	0	1.33333	#DIV/0!	#DIV/0!	≥ 0.05	-
A0A023FBZ9	Putative secreted protein	Amblyomma cajennense PE	141	14.8175	8.17725	1	2	5	7	0	38.3	3	3	0	0	0	0	0	7.09	1	1	0	0	0	0	0	9.22	1	1	0	24.11	2	2	1.33333	1	0.75	-0.415037	≥ 0.05	-
A0A023FC07	Putative secreted protein	Amblyomma cajennense PE	140	15.6429	10.0229	1	1	6	8	0	0	0	0	0	27.14	4	4	0	0	0	0	0	0	0	0	2.11334	25	3	3	0	0	0	0	1.33333	1	0.75	-0.415037	≥ 0.05	-
A0A023FC09	Putative secreted mucin	Amblyomma cajennense PE	144	15.1689	11.3853	1	1	4	10	0	0	0	0	0	0	0	0	1.69749	24.31	2	3	2.21168	14.58	1	1	1.74719	14.58	1	1	0	27.78	3	3	1	1.66667	1.66667	0.736966	≥ 0.05	-
A0A023FC28	Putative secreted protein	Amblyomma cajennense PE	165	18.3254	8.55811	1	1	4	5	2.11564	18.18	2	2	0	0	0	0	0	0	0	0	0	0	0	0	0	0	0	0	0	12.12	1	1	0.666667	0.333333	0.5	-1	≥ 0.05	-
A0A023FC31	Putative secreted protein (Fragment)	Amblyomma cajennense PE	170	18.0921	9.26123	1	1	2	2	0	0	0	0	0	19.41	2	2	0	0	0	0	0	0	0	0	0	0	0	0	0	0	0	0	0.666667	0	0	#NUM!	≥ 0.05	-
A0A023FC32	Putative secreted protein	Amblyomma cajennense PE	175	18.9211	8.22119	1	2	4	4	0	0	0	0	0	0	0	0	0	20	2	2	0	0	0	0	0	0	0	0	0	11.43	2	2	0.666667	0.666667	1	0	≥ 0.05	-
A0A023FC59	Putative secreted protein (Fragment)	Amblyomma cajennense PE	222	24.3534	10.1108	1	4	9	17	0	0	0	0	2.07651	19.82	3	3	1.71064	20.72	4	4	0	26.13	4	5	1.67393	20.27	3	4	0	7.21	1	1	2.33333	3.33333	1.42857	0.514573	≥ 0.05	-
A0A023FC62	Putative secreted mucin (Fragment)	Amblyomma cajennense PE	225	23.3078	8.99756	1	2	3	5	0	0	0	0	0	0	0	0	0	5.33	2	3	0	0	0	0	1.68818	12.44	2	2	0	0	0	0	1	0.666667	0.666667	-0.584963	≥ 0.05	-
A0A023FC64	Putative secreted protein (Fragment)	Amblyomma cajennense PE	236	26.6378	8.74854	1	1	2	2	0	0	0	0	0	0	0	0	0	0	0	0	0	0	0	0	0	13.14	2	2	0	0	0	0	0	0.666667	#DIV/0!	#DIV/0!	≥ 0.05	-
A0A023FC75	Annexin (Fragment)	Amblyomma cajennense PE	366	40.4645	6.60986	1	0	19	73	7.98559	22.68	8	10	16.0935	24.59	9	12	8.77944	18.85	7	10	13.317	25.41	8	10	8.01338	15.85	5	6	14.4311	25.41	7	9	10.6667	8.33333	0.78125	-0.356144	≥ 0.05	F:calcium ion binding; F:calcium-dependent phospholipid binding
A0A023FC79	Putative tick til 23 (Fragment)	Amblyomma cajennense PE	707	78.0734	8.6167	1	4	30	40	1.89023	11.74	7	7	3.35039	9.9	6	6	0	0	0	0	0	12.16	8	8	0	3.82	2	3	0	15.7	8	8	4.33333	6.33333	1.46154	0.547488	≥ 0.05	-
A0A023FC81	Putative conserved plasma membrane protein (Fragment)	Amblyomma cajennense PE	604	65.8171	5.98584	1	2	10	15	0	0	0	0	0	0	0	0	0	7.62	4	5	0	3.81	2	2	2.17911	7.12	3	3	0	9.6	4	4	1.66667	3	1.8	0.847997	≥ 0.05	-
A0A023FC84	Putative deddh 3'-5' exonuclease domain of oligoribonuclease (Fragment)	Amblyomma cajennense PE	166	19.2036	7.85498	1	3	6	9	0	0	0	0	0	5.42	1	1	0	0	0	0	1.65902	13.86	2	2	0	20.48	2	2	0	0	0	0	0.333333	1.33333	4	2	≥ 0.05	F:nucleic acid binding; F:exonuclease activity; P:nucleic acid phosphodiester bond hydrolysis
A0A023FC91	Putative periodic tryptophan protein 1	Amblyomma cajennense PE	257	28.4764	4.39893	1	1	5	8	0	0	0	0	0	0	0	0	1.89347	4.67	1	1	0	0	0	0	0	4.67	1	1	1.74298	21.79	3	5	0.333333	2	6	2.58496	≥ 0.05	-
A0A023FC94	Putative upstream transcription factor 2 c-fos (Fragment)	Amblyomma cajennense PE	270	28.8402	5.31299	1	1	5	6	0	0	0	0	2.16526	5.19	1	1	0	0	0	0	0	17.78	3	3	0	0	0	0	0	3.7	1	1	0.333333	1.33333	4	2	≥ 0.05	F:protein dimerization activity
A0A023FC95	Putative regulator of nonsense transcripts 3a (Fragment)	Amblyomma cajennense PE	315	37.2171	8.92432	1	0	5	5	0	0	0	0	0	0	0	0	0	0	0	0	0	0	0	0	0	9.21	2	2	0	0	0	0	0	0.666667	#DIV/0!	#DIV/0!	≥ 0.05	F:nucleotide binding
A0A023FC99	Putative leucine permease transcriptional regulator (Fragment)	Amblyomma cajennense PE	385	43.0139	8.68994	1	5	12	16	0	0	0	0	0	5.71	1	1	0	0	0	0	0	9.09	3	3	0	19.22	4	4	0	10.65	3	3	0.333333	3.33333	10	3.32193	≥ 0.05	-
A0A023FCA0	Putative adenylate/guanylate cyclase (Fragment)	Amblyomma cajennense PE	375	41.6703	6.55127	1	3	11	17	2.88267	21.87	6	8	0	0	0	0	0	0	0	0	0	7.47	2	3	1.7153	15.47	5	5	0	0	0	0	2.66667	2.66667	1	0	≥ 0.05	C:intracellular; F:phosphorus-oxygen lyase activity; P:cyclic nucleotide biosynthetic process; P:intracellular signal transduction
A0A023FCA3	Putative 3'5'-cyclic nucleotide phosphodiesterase (Fragment)	Amblyomma cajennense PE	662	73.7963	6.93213	1	3	18	36	4.05081	11.63	5	5	2.26282	12.69	5	6	2.09165	4.68	2	3	2.4547	11.03	5	5	2.00941	9.82	5	6	2.22277	6.04	4	4	4.66667	5	1.07143	0.0995357	≥ 0.05	F:3',5'-cyclic-nucleotide phosphodiesterase activity; P:signal transduction; P:metabolic process
A0A023FCA4	Putative regulator of nuclear mrna (Fragment)	Amblyomma cajennense PE	579	62.786	8.54346	1	1	9	12	1.73319	3.63	2	2	0	0	0	0	0	1.9	1	1	4.1459	10.88	5	5	0	0	0	0	0	7.94	4	4	1	3	3	1.58496	≥ 0.05	-
A0A023FCA5	Uncharacterized protein	Amblyomma cajennense PE	164	18.1566	8.86572	1	2	11	24	0	39.63	5	6	0	18.9	3	3	0	0	0	0	0	21.95	2	2	0	17.07	3	6	0	0	0	0	3	2.66667	0.888889	-0.169925	≥ 0.05	F:serine-type endopeptidase inhibitor activity; P:negative regulation of endopeptidase activity
A0A023FCA9	Putative tetratricopeptide repeat protein (Fragment)	Amblyomma cajennense PE	212	23.9209	5.09717	1	1	3	3	0	0	0	0	0	0	0	0	0	21.7	3	3	0	0	0	0	0	0	0	0	0	0	0	0	1	0	0	#NUM!	≥ 0.05	-
A0A023FCB1	Uncharacterized protein (Fragment)	Amblyomma cajennense PE	359	39.7765	7.84033	1	1	10	15	1.81164	11.42	3	3	0	0	0	0	0	13.37	3	3	0	10.58	3	3	0	0	0	0	1.60248	11.14	2	2	2	1.66667	0.833333	-0.263034	≥ 0.05	F:oxidoreductase activity, acting on CH-OH group of donors; F:flavin adenine dinucleotide binding; P:oxidation-reduction process
A0A023FCB4	Putative cyclin-dependent kinase cdk5 (Fragment)	Amblyomma cajennense PE	535	59.4508	9.36377	1	1	20	48	1.78812	3.18	2	2	3.39144	10.28	4	4	2.22665	15.51	7	11	5.23114	18.5	8	9	0	11.4	5	6	3.74697	6.54	3	3	5.66667	6	1.05882	0.0824622	≥ 0.05	F:protein kinase activity; F:ATP binding; P:protein phosphorylation
A0A023FCB5	Uncharacterized protein (Fragment)	Amblyomma cajennense PE	187	21.7608	6.58057	1	1	4	30	0	6.95	2	5	0	12.3	3	6	3.80001	5.88	1	7	0	0	0	0	0	0	0	0	0	13.37	2	5	6	1.66667	0.277778	-1.848	≥ 0.05	F:acetyltransferase activity; P:metabolic process
A0A023FCB9	Putative 5'-amp-activated protein kinase gamma subunit (Fragment)	Amblyomma cajennense PE	448	50.6214	7.56201	7	1	9	18	0	0	0	0	0	0	0	0	1.72519	12.95	6	6	0	0	0	0	0	0	0	0	0	0	0	0	2	0	0	#NUM!	≥ 0.05	F:kinase activity; P:phosphorylation
A0A023FCC3	Putative conserved plasma membrane protein (Fragment)	Amblyomma cajennense PE	261	29.5139	9.39307	1	1	2	2	0	0	0	0	0	0	0	0	0	0	0	0	0	0	0	0	0	0	0	0	2.12872	11.49	2	2	0	0.666667	#DIV/0!	#DIV/0!	≥ 0.05	-
A0A023FCD3	Putative evasin 6 (Fragment)	Amblyomma cajennense PE	94	10.8804	7.04932	1	1	5	6	3.42247	24.47	2	2	0	0	0	0	3.44217	44.68	4	4	0	0	0	0	0	0	0	0	0	0	0	0	2	0	0	#NUM!	≥ 0.05	-
A0A023FCG1	Putative secreted protein	Amblyomma cajennense PE	108	11.971	7.6499	1	2	2	4	0	0	0	0	0	0	0	0	0	0	0	0	0	18.52	1	1	0	31.48	2	3	0	0	0	0	0	1.33333	#DIV/0!	#DIV/0!	≥ 0.05	-
A0A023FCH2	Putative tudor domain protein (Fragment)	Amblyomma cajennense PE	149	17.2811	7.98682	1	1	7	8	1.63204	32.89	4	4	0	0	0	0	0	14.77	1	1	0	0	0	0	0	8.05	1	1	0	0	0	0	1.66667	0.333333	0.2	-2.32193	≥ 0.05	-
A0A023FCH9	Putative secreted protein	Amblyomma cajennense PE	116	12.9925	9.17334	1	1	3	4	0	0	0	0	2.11111	12.93	1	1	0	32.76	3	3	0	0	0	0	0	0	0	0	0	0	0	0	1.33333	0	0	#NUM!	≥ 0.05	-
A0A023FCI4	Putative lipocalin-3 1 (Fragment)	Amblyomma cajennense PE	187	20.8093	9.26123	1	3	7	16	1.7975	9.63	2	2	1.81344	25.13	4	5	1.7768	4.81	1	2	1.79472	4.81	1	1	1.65	16.04	3	3	0	0	0	0	3	1.33333	0.444444	-1.16993	≥ 0.05	-
A0A023FCI9	Uncharacterized protein	Amblyomma cajennense PE	201	22.563	9.5249	2	4	14	19	1.64231	25.87	5	5	1.8337	4.98	1	1	0	21.89	4	4	0	0	0	0	0	15.42	3	3	0	0	0	0	3.33333	1	0.3	-1.73697	≥ 0.05	F:translation initiation factor activity; P:translational initiation
A0A023FCK4	Putative serine/arginine-rich splicing factor 2 (Fragment)	Amblyomma cajennense PE	288	34.7753	12.0298	1	1	7	11	0	12.5	3	3	0	0	0	0	0	0	0	0	0	12.85	3	4	0	0	0	0	2.33429	8.33	2	2	1	2	2	1	≥ 0.05	F:nucleotide binding; F:nucleic acid binding
A0A023FCK5	Putative secreted protein	Amblyomma cajennense PE	128	14.8736	7.63525	1	1	4	5	0	0	0	0	0	0	0	0	2.12602	46.09	4	4	0	0	0	0	0	0	0	0	0	0	0	0	1.33333	0	0	#NUM!	≥ 0.05	-
A0A023FCL8	Putative alginate regulatory protein (Fragment)	Amblyomma cajennense PE	358	36.2062	10.272	1	3	6	9	0	0	0	0	0	18.99	3	3	1.70978	4.47	2	2	1.9188	4.19	1	1	0	0	0	0	0	0	0	0	1.66667	0.333333	0.2	-2.32193	≥ 0.05	-
A0A023FCM5	Uncharacterized protein (Fragment)	Amblyomma cajennense PE	417	45.6456	5.18604	1	2	11	19	0	5.76	2	3	0	0	0	0	0	0	0	0	1.82942	11.27	2	3	0	16.31	4	4	0	19.66	4	4	1	3.66667	3.66667	1.87447	≥ 0.05	-
A0A023FCN3	Putative nucleic acid binding protein (Fragment)	Amblyomma cajennense PE	557	61.4743	5.87158	1	7	20	27	1.87631	18.85	7	7	1.63421	4.31	2	2	0	11.13	4	4	0	11.13	5	5	1.63544	12.21	6	6	0	5.92	3	3	4.33333	4.66667	1.07692	0.106915	≥ 0.05	-
A0A023FCN6	Uncharacterized protein	Amblyomma cajennense PE	1324	150.974	7.18115	1	2	32	60	1.7146	8.91	8	9	3.64004	5.51	5	5	1.73428	7.93	7	7	0	7.02	7	7	1.70951	8.99	8	10	0	8.08	8	10	7	9	1.28571	0.36257	≥ 0.05	-
A0A023FCP7	Putative secreted protein	Amblyomma cajennense PE	92	10.2339	8.5874	1	1	2	2	0	0	0	0	0	0	0	0	0	0	0	0	0	0	0	0	1.68829	23.91	2	2	0	0	0	0	0	0.666667	#DIV/0!	#DIV/0!	≥ 0.05	-
A0A023FCP9	Putative secreted protein	Amblyomma cajennense PE	152	16.9496	4.44971	1	1	3	10	0	24.34	2	3	0	13.16	2	2	0	8.55	1	1	0	8.55	1	1	0	0	0	0	0	0	0	0	2	0.333333	0.166667	-2.58496	≥ 0.05	-
A0A023FCQ3	Uncharacterized protein	Amblyomma cajennense PE	103	12.0629	8.73389	1	1	3	8	0	0	0	0	0	0	0	0	0	0	0	0	1.61629	34.95	3	4	0	0	0	0	0	0	0	0	0	1.33333	#DIV/0!	#DIV/0!	≥ 0.05	-
A0A023FCQ8	Putative evasin 1 (Fragment)	Amblyomma cajennense PE	157	17.1826	8.6167	1	1	7	7	2.11892	10.19	2	2	0	0	0	0	1.9143	9.55	1	1	0	0	0	0	0	21.02	2	2	0	26.11	2	2	1	1.33333	1.33333	0.415037	≥ 0.05	-
A0A023FCS2	Putative ribosomal protein	Amblyomma cajennense PE	168	17.78	5.65576	1	2	5	9	0	19.05	1	1	2.03707	12.5	2	2	0	0	0	0	1.63195	5.36	1	1	0	0	0	0	1.83772	11.31	2	3	1	1.33333	1.33333	0.415037	≥ 0.05	C:ribosome; F:structural constituent of ribosome; P:translational elongation
A0A023FCV1	Putative ixodegrins large 4	Amblyomma cajennense PE	139	15.6546	9.05615	1	1	6	8	0	14.39	1	1	0	0	0	0	0	25.18	3	3	0	10.07	1	1	0	0	0	0	0	0	0	0	1.33333	0.333333	0.25	-2	≥ 0.05	-
A0A023FCY0	Putative secreted protein (Fragment)	Amblyomma cajennense PE	210	23.9416	9.84717	1	3	3	5	0	0	0	0	0	0	0	0	0	0	0	0	0	0	0	0	1.65286	10.48	2	3	0	6.19	2	2	0	1.66667	#DIV/0!	#DIV/0!	≥ 0.05	-
A0A023FCZ7	Uncharacterized protein (Fragment)	Amblyomma cajennense PE	193	21.999	8.79248	1	4	7	14	0	20.73	3	3	0	14.51	2	3	0	27.98	4	4	0	4.15	1	1	0	0	0	0	0	16.58	2	2	3.33333	1	0.3	-1.73697	≥ 0.05	-
A0A023FD15	Putative secreted mucin (Fragment)	Amblyomma cajennense PE	207	22.6432	5.19873	2	1	3	3	0	0	0	0	0	0	0	0	0	8.7	1	1	0	0	0	0	0	0	0	0	0	13.53	2	2	0.333333	0.666667	2	1	≥ 0.05	-
A0A023FD31	Putative 20-hydroxysteroid dehydrogenase ixodes scapularis 20-hydroxysteroid dehydrogenase (Fragment)	Amblyomma cajennense PE	313	34.6877	7.6792	7	1	4	5	2.32785	8.95	3	3	0	0	0	0	0	0	0	0	2.34509	8.95	2	2	0	0	0	0	0	0	0	0	1	0.666667	0.666667	-0.584963	≥ 0.05	F:oxidoreductase activity; P:oxidation-reduction process
A0A023FD32	Putative secreted protein (Fragment)	Amblyomma cajennense PE	79	8.1574	10.521	1	2	3	5	0	0	0	0	0	0	0	0	0	34.18	2	3	0	0	0	0	0	0	0	0	0	0	0	0	1	0	0	#NUM!	≥ 0.05	-
A0A023FD38	Putative secreted protein	Amblyomma cajennense PE	236	26.6256	9.14404	1	3	4	5	0	0	0	0	0	10.17	1	1	0	10.17	1	1	0	0	0	0	1.73554	10.17	2	2	0	4.66	1	1	0.666667	1	1.5	0.584963	≥ 0.05	-
A0A023FD39	Putative cell wall protein dan4	Amblyomma cajennense PE	402	43.8745	4.729	1	1	7	15	0	0	0	0	0	0	0	0	0	6.47	2	2	3.55537	8.21	3	3	0	8.21	3	4	3.60412	11.19	4	4	0.666667	3.66667	5.5	2.45943	≥ 0.05	-
A0A023FD51	Putative e3 ubiquitin-protein ligase amfr (Fragment)	Amblyomma cajennense PE	538	61.804	6.69775	2	1	5	9	2.38868	4.28	2	3	0	0	0	0	0	9.11	3	3	0	0	0	0	0	3.53	1	1	0	0	0	0	2	0.333333	0.166667	-2.58496	≥ 0.05	F:zinc ion binding; F:ligase activity; P:metabolic process
A0A023FD75	Putative ubiquinol cytochrome c reductase assembly protein cbp3 (Fragment)	Amblyomma cajennense PE	268	30.9359	8.79248	1	4	7	11	0	0	0	0	0	4.85	1	1	0	0	0	0	0	23.13	5	7	0	14.55	3	3	0	0	0	0	0.333333	3.33333	10	3.32193	≥ 0.05	-
A0A023FD79	Uncharacterized protein (Fragment)	Amblyomma cajennense PE	310	33.414	8.29443	1	1	6	15	0	22.9	4	4	0	0	0	0	0	0	0	0	0	17.74	3	5	0	12.26	2	3	2.07552	8.71	1	3	1.33333	3.66667	2.75	1.45943	≥ 0.05	F:protein tyrosine phosphatase activity; F:protein tyrosine/serine/threonine phosphatase activity; P:peptidyl-tyrosine dephosphorylation
A0A023FD94	Putative rna-binding protein hnrnp-m	Amblyomma cajennense PE	548	57.5307	9.78857	2	2	19	34	1.63991	8.21	4	4	2.34566	6.57	4	4	1.96465	11.86	6	6	0	0	0	0	1.63664	10.95	7	7	0	10.77	5	5	4.66667	4	0.857143	-0.222392	≥ 0.05	F:nucleotide binding; F:nucleic acid binding
A0A023FDA0	Putative rab subfamily protein of small gtpase (Fragment)	Amblyomma cajennense PE	181	20.5043	8.32373	1	1	3	3	0	0	0	0	0	0	0	0	0	20.99	2	2	0	0	0	0	0	0	0	0	0	8.84	1	1	0.666667	0.333333	0.5	-1	≥ 0.05	C:intracellular; F:GTP binding; P:small GTPase mediated signal transduction; P:protein transport
A0A023FDA1	Uncharacterized protein	Amblyomma cajennense PE	92	10.5056	7.6792	1	1	5	13	1.66017	43.48	2	3	0	11.96	1	1	0	19.57	2	3	0	38.04	2	2	0	19.57	2	2	0	11.96	1	1	2.33333	1.66667	0.714286	-0.485427	≥ 0.05	-
A0A023FDH0	Uncharacterized protein	Amblyomma cajennense PE	164	18.0885	8.95361	1	7	12	31	3.47508	20.12	2	3	1.93848	21.34	2	2	0	23.17	3	9	0	37.2	4	4	0	21.34	3	3	0	0	0	0	4.66667	2.33333	0.5	-1	≥ 0.05	F:serine-type endopeptidase inhibitor activity; P:negative regulation of endopeptidase activity
A0A023FDH5	Putative nucleolar and coiled-body phosphoprotein 1 (Fragment)	Amblyomma cajennense PE	300	32.1608	9.53955	1	1	7	7	0	0	0	0	0	7.33	2	2	0	0	0	0	0	0	0	0	0	12.33	3	3	0	6.67	1	1	0.666667	1.33333	2	1	≥ 0.05	-
A0A023FDJ0	Putative glutamine synthetase (Fragment)	Amblyomma cajennense PE	421	46.6647	7.86963	2	2	8	13	3.52292	4.28	2	2	0	0	0	0	0	0	0	0	0	14.25	4	4	0	0	0	0	0	2.85	1	1	0.666667	1.66667	2.5	1.32193	≥ 0.05	F:glutamate-ammonia ligase activity; P:glutamine biosynthetic process
A0A023FDJ6	Putative dihydrolipoamide succinyltransferase 2-oxoglutarate dehydrogenase e2 subunit (Fragment)	Amblyomma cajennense PE	576	61.0465	7.7085	3	2	15	32	2.31532	2.08	1	1	4.52478	10.76	6	6	4.23471	16.67	6	6	1.75493	10.42	5	5	1.79377	8.16	5	5	0	7.47	4	5	4.33333	5	1.15385	0.206451	≥ 0.05	C:oxoglutarate dehydrogenase complex; F:dihydrolipoyllysine-residue succinyltransferase activity; P:tricarboxylic acid cycle
A0A023FDM4	Putative chaperone activity of bc1 complex-like mitochondrial-like protein	Amblyomma cajennense PE	240	26.3268	9.15869	1	3	7	11	0	0	0	0	0	0	0	0	3.69089	19.17	5	5	2.32454	12.92	3	3	0	0	0	0	2.00862	18.75	3	3	1.66667	2	1.2	0.263034	≥ 0.05	-
A0A023FDN2	Putative fed tick salivary protein 1	Amblyomma cajennense PE	74	8.37728	9.75928	1	1	3	5	0	0	0	0	0	22.97	1	1	0	0	0	0	1.89895	44.59	3	3	0	0	0	0	0	0	0	0	0.333333	1	3	1.58496	≥ 0.05	-
A0A023FDN3	Uncharacterized protein	Amblyomma cajennense PE	106	12.2679	7.15186	1	1	4	6	1.65999	26.42	2	2	0	0	0	0	0	39.62	2	2	0	0	0	0	0	17.92	1	1	0	0	0	0	1.33333	0.333333	0.25	-2	≥ 0.05	-
A0A023FDP0	Uncharacterized protein (Fragment)	Amblyomma cajennense PE	84	9.49017	8.47021	1	1	8	43	11.3291	64.29	5	6	12.0571	51.19	4	6	9.59331	58.33	5	5	11.7433	47.62	4	5	7.77676	51.19	5	6	7.07659	51.19	4	5	5.66667	5.33333	0.941176	-0.0874628	≥ 0.05	-
A0A023FDP4	Putative secreted protein	Amblyomma cajennense PE	98	11.1866	7.79639	1	2	3	4	0	0	0	0	0	0	0	0	2.03221	38.78	3	4	0	0	0	0	0	0	0	0	0	0	0	0	1.33333	0	0	#NUM!	≥ 0.05	-
A0A023FDQ0	Putative secreted protein	Amblyomma cajennense PE	125	14.4332	9.14404	1	2	5	14	0	0	0	0	0	0	0	0	0	10.4	3	3	0	0	0	0	0	32	4	5	0	17.6	3	4	1	3	3	1.58496	≥ 0.05	-
A0A023FDQ9	Putative secreted protein	Amblyomma cajennense PE	136	15.34	5.68115	1	1	2	4	0	0	0	0	0	0	0	0	0	14.71	1	1	0	16.91	2	2	0	0	0	0	0	13.97	1	1	0.333333	1	3	1.58496	≥ 0.05	-
A0A023FDT4	Putative tick kunitz 14	Amblyomma cajennense PE	172	20.3598	8.20654	1	1	6	8	0	22.09	2	2	0	0	0	0	0	26.74	3	3	0	0	0	0	0	0	0	0	0	0	0	0	1.66667	0	0	#NUM!	≥ 0.05	F:serine-type endopeptidase inhibitor activity; P:negative regulation of endopeptidase activity
A0A023FDT8	Putative secreted protein (Fragment)	Amblyomma cajennense PE	181	19.7546	7.09326	1	1	3	6	0	0	0	0	0	0	0	0	0	21.55	3	4	0	0	0	0	0	11.6	1	2	0	0	0	0	1.33333	0.666667	0.5	-1	≥ 0.05	-
A0A023FDU2	Putative secreted protein 94	Amblyomma cajennense PE	188	21.2851	8.99756	1	1	8	20	2.81954	34.04	4	5	7.10892	10.64	1	3	10.7485	16.49	2	5	2.85154	15.43	2	2	0	20.74	2	2	2.66665	22.34	3	3	4.33333	2.33333	0.538462	-0.893085	≥ 0.05	-
A0A023FDU4	Putative secreted protein 94	Amblyomma cajennense PE	190	21.5102	9.21729	1	2	9	19	4.2891	19.47	3	4	4.89088	18.95	3	4	3.41012	29.47	4	4	0	0	0	0	0	0	0	0	2.34609	13.68	2	2	4	0.666667	0.166667	-2.58496	≥ 0.05	-
A0A023FDV1	Uncharacterized protein (Fragment)	Amblyomma cajennense PE	199	22.8786	9.21729	2	3	8	8	0	0	0	0	0	0	0	0	0	44.22	4	4	0	0	0	0	0	7.54	1	1	2.02005	16.58	2	2	1.33333	1	0.75	-0.415037	≥ 0.05	-
A0A023FDX9	Putative secreted protein	Amblyomma cajennense PE	111	12.172	10.1401	1	1	4	10	0	25.23	2	3	0	0	0	0	0	33.33	2	2	0	0	0	0	0	27.03	2	2	0	0	0	0	1.66667	0.666667	0.4	-1.32193	≥ 0.05	-
A0A023FDY0	Putative secreted protein (Fragment)	Amblyomma cajennense PE	230	25.8262	8.66064	1	1	3	6	1.81185	6.96	2	3	0	0	0	0	1.87845	3.91	1	1	1.66381	5.65	2	2	0	0	0	0	0	0	0	0	1.33333	0.666667	0.5	-1	≥ 0.05	-
A0A023FDY7	Uncharacterized protein	Amblyomma cajennense PE	124	13.8589	5.22412	3	1	5	5	0	0	0	0	0	0	0	0	1.83783	39.52	3	3	0	0	0	0	0	0	0	0	0	0	0	0	1	0	0	#NUM!	≥ 0.05	-
A0A023FE19	Putative secreted protein	Amblyomma cajennense PE	124	14.5082	9.46631	1	1	2	2	0	0	0	0	0	0	0	0	0	0	0	0	0	25.81	2	2	0	0	0	0	0	0	0	0	0	0.666667	#DIV/0!	#DIV/0!	≥ 0.05	-
A0A023FE43	Putative secreted protein	Amblyomma cajennense PE	136	15.1568	11.0923	1	1	3	3	0	0	0	0	0	0	0	0	0	13.97	1	1	0	0	0	0	2.04425	30.88	2	2	0	0	0	0	0.333333	0.666667	2	1	≥ 0.05	-
A0A023FE54	Histone H3	Amblyomma cajennense PE	136	15.4065	11.1216	1	1	13	33	3.37394	22.79	4	5	9.86007	30.88	5	8	3.77722	15.44	3	4	3.26321	33.82	5	5	1.78349	6.62	1	1	1.99748	18.38	3	3	5.66667	3	0.529412	-0.917538	≥ 0.05	C:nucleosome; C:nucleus; F:DNA binding; F:protein heterodimerization activity
A0A023FE57	Putative secreted protein	Amblyomma cajennense PE	150	16.4597	11.0044	1	4	9	12	0	18	2	2	0	0	0	0	0	46.67	4	4	0	0	0	0	0	0	0	0	0	41.33	5	6	2	2	1	0	≥ 0.05	-
A0A023FE85	Putative conserved plasma membrane protein	Amblyomma cajennense PE	285	31.8445	8.29443	3	2	3	3	0	0	0	0	0	0	0	0	0	0	0	0	0	15.79	3	3	0	0	0	0	0	0	0	0	0	1	#DIV/0!	#DIV/0!	≥ 0.05	-
A0A023FE99	Uncharacterized protein	Amblyomma cajennense PE	324	37.0595	7.86963	1	1	3	3	0	12.04	2	2	0	0	0	0	0	0	0	0	0	0	0	0	0	0	0	0	0	5.25	1	1	0.666667	0.333333	0.5	-1	≥ 0.05	-
A0A023FEA4	Putative secreted protein	Amblyomma cajennense PE	183	20.307	8.73389	1	2	6	6	0	0	0	0	0	0	0	0	0	0	0	0	0	0	0	0	0	23.5	4	4	0	10.93	2	2	0	2	#DIV/0!	#DIV/0!	≥ 0.05	-
A0A023FEA6	Putative secreted protein	Amblyomma cajennense PE	171	19.1647	8.92432	1	1	6	11	0	0	0	0	0	0	0	0	2.01919	33.33	3	3	0	8.77	2	2	1.5843	15.79	3	3	2.03588	6.43	1	1	1	2	2	1	≥ 0.05	-
A0A023FEB4	Peptidyl-prolyl cis-trans isomerase	Amblyomma cajennense PE	148	16.4453	8.70459	5	1	2	4	0	0	0	0	0	21.62	2	2	0	0	0	0	0	0	0	0	0	0	0	0	0	11.49	1	1	0.666667	0.333333	0.5	-1	≥ 0.05	F:peptidyl-prolyl cis-trans isomerase activity; P:protein peptidyl-prolyl isomerization; P:protein folding
A0A023FEC7	Putative secreted protein	Amblyomma cajennense PE	190	21.0784	9.01221	1	1	3	3	2.11156	12.11	2	2	0	0	0	0	0	0	0	0	0	0	0	0	0	0	0	0	0	6.84	1	1	0.666667	0.333333	0.5	-1	≥ 0.05	-
A0A023FEC8	Putative amino acid transporter (Fragment)	Amblyomma cajennense PE	704	76.7536	7.91357	4	1	10	24	3.42745	4.26	3	3	0	0	0	0	1.68024	5.97	4	6	0	6.53	4	5	1.87484	6.82	4	5	0	1.42	1	1	3	3.66667	1.22222	0.289507	≥ 0.05	C:membrane; F:transporter activity; P:ion transport; P:transmembrane transport
A0A023FED7	Putative lipocalin-3 1	Amblyomma cajennense PE	206	23.7291	8.29443	1	2	7	12	0	17.96	3	3	0	19.9	3	3	0	0	0	0	0	10.19	2	3	0	20.39	3	3	0	0	0	0	2	2	1	0	≥ 0.05	-
A0A023FEE3	Actin-related protein 2/3 complex subunit 5	Amblyomma cajennense PE	152	16.6164	5.60498	1	1	8	10	1.67035	23.03	3	3	0	8.55	1	1	1.99755	9.87	1	1	1.89588	17.76	2	2	1.72688	22.37	3	3	0	0	0	0	1.66667	1.66667	1	0	≥ 0.05	C:Arp2/3 protein complex; P:Arp2/3 complex-mediated actin nucleation
A0A023FEF4	Putative secreted protein	Amblyomma cajennense PE	235	24.3754	7.59131	1	1	8	8	0	0	0	0	0	12.34	2	2	0	0	0	0	0	0	0	0	0	13.62	2	2	0	22.55	4	4	0.666667	2	3	1.58496	≥ 0.05	-
A0A023FEF7	Putative threonine aldolase	Amblyomma cajennense PE	155	17.4867	6.18896	1	2	2	9	0	0	0	0	0	14.19	1	3	0	19.35	2	3	0	0	0	0	0	14.19	1	1	0	0	0	0	2	0.333333	0.166667	-2.58496	≥ 0.05	F:lyase activity; P:cellular amino acid metabolic process
A0A023FEF8	Putative alcohol dehydrogenase class iv (Fragment)	Amblyomma cajennense PE	329	35.2946	7.26904	1	1	3	8	0	0	0	0	2.25274	9.73	2	2	0	7.9	2	3	0	0	0	0	0	3.65	1	1	0	0	0	0	1.66667	0.333333	0.2	-2.32193	≥ 0.05	F:oxidoreductase activity; F:metal ion binding; P:oxidation-reduction process
A0A023FEG0	Putative kunitz-type serine protease inhibitor	Amblyomma cajennense PE	247	28.2266	9.11475	1	5	12	19	0	0	0	0	2.20321	13.36	3	3	0	0	0	0	1.74665	19.84	4	4	0	10.93	2	4	0	17.41	3	3	1	3.66667	3.66667	1.87447	≥ 0.05	F:serine-type endopeptidase inhibitor activity; F:peptidase activity; P:proteolysis; P:negative regulation of endopeptidase activity
A0A023FEG1	Protein-l-isoaspartated-aspartate o-methyltransferase (Fragment)	Amblyomma cajennense PE	381	42.8677	7.88428	1	1	3	3	0	5.25	1	1	1.72696	6.04	2	2	0	0	0	0	0	0	0	0	0	0	0	0	0	0	0	0	1	0	0	#NUM!	≥ 0.05	F:protein-L-isoaspartate (D-aspartate) O-methyltransferase activity; P:protein methylation
A0A023FEG2	Putative 40s ribosomal protein s10	Amblyomma cajennense PE	156	18.0264	9.80322	4	3	12	23	3.79852	25.64	4	4	6.96184	23.08	3	3	2.11012	43.59	4	4	1.97398	36.54	5	6	4.22403	19.23	2	2	0	0	0	0	3.66667	2.66667	0.727273	-0.459432	≥ 0.05	C:ribosome
A0A023FEG8	Protein disulfide isomerase	Amblyomma cajennense PE	1083	123.777	4.55127	2	3	21	26	0	0	0	0	1.86041	3.88	3	3	1.6529	3.88	5	5	1.61422	4.62	4	4	0	0	0	0	1.62639	5.91	7	8	2.66667	4	1.5	0.584963	≥ 0.05	C:cell; F:isomerase activity; P:metabolic process; P:cell redox homeostasis
A0A023FEH7	Putative nuclear pore proteinucleoporin 62 (Fragment)	Amblyomma cajennense PE	557	57.7707	10.3599	2	1	7	9	0	0	0	0	0	11.85	5	5	0	0	0	0	1.64164	4.49	2	2	0	0	0	0	0	0	0	0	1.66667	0.666667	0.4	-1.32193	≥ 0.05	-
A0A023FEH9	Putative conserved plasma membrane protein (Fragment)	Amblyomma cajennense PE	195	21.8689	7.86963	1	1	3	6	0	21.54	2	4	0	0	0	0	0	0	0	0	0	12.82	2	2	0	0	0	0	0	0	0	0	1.33333	0.666667	0.5	-1	≥ 0.05	-
A0A023FEI0	Putative secreted papa repeat protein	Amblyomma cajennense PE	1170	120.353	4.25928	3	1	6	6	0	0	0	0	0	0	0	0	0	0	0	0	0	4.79	4	4	0	0	0	0	0	0	0	0	0	1.33333	#DIV/0!	#DIV/0!	≥ 0.05	-
A0A023FEI5	Putative procollagen-proline 2-oxoglutarate 4-dioxygenase proline 4-hydroxylase beta polypeptide (Fragment)	Amblyomma cajennense PE	305	34.2223	5.98584	2	3	8	11	0	9.84	2	3	0	0	0	0	0	13.77	5	6	0	0	0	0	0	0	0	0	0	0	0	0	3	0	0	#NUM!	≥ 0.05	C:cell; F:isomerase activity; F:dioxygenase activity; P:cell redox homeostasis; P:oxidation-reduction process
A0A023FEJ8	Putative 26s proteasome non-atpase regulatory subunit 4 (Fragment)	Amblyomma cajennense PE	307	33.5983	4.51318	1	1	5	10	0	0	0	0	1.61197	6.51	3	3	0	10.75	4	4	0	0	0	0	0	0	0	0	0	0	0	0	2.33333	0	0	#NUM!	≥ 0.05	C:proteasome regulatory particle, base subcomplex; P:ubiquitin-dependent protein catabolic process
A0A023FEK0	Putative grp-3 498 glycine rich family	Amblyomma cajennense PE	323	34.868	8.92432	3	2	14	29	0	3.1	1	1	3.45502	14.24	3	4	0	12.69	4	4	1.62289	11.46	3	3	0	18.58	6	6	1.64813	13.31	3	3	3	4	1.33333	0.415037	≥ 0.05	F:metal ion binding; F:nucleic acid binding; F:nucleotide binding; F:zinc ion binding
A0A023FEK4	Uncharacterized protein	Amblyomma cajennense PE	1015	111.075	6.50732	2	5	19	46	4.41587	2.86	2	4	6.02865	7.78	5	5	2.05324	7.98	4	4	2.63029	8.87	5	9	4.53711	9.06	6	7	2.33136	9.66	7	7	4.33333	7.66667	1.76923	0.823122	≥ 0.05	-
A0A023FEK7	Putative terribly reduced optic lobes (Fragment)	Amblyomma cajennense PE	1109	122.957	5.021	2	2	33	42	0	0	0	0	1.71612	6.31	4	4	0	7.57	5	6	0	0	0	0	6.22336	8.57	7	8	0	13.98	10	13	3.33333	7	2.1	1.07039	≥ 0.05	-
A0A023FEK8	Putative translation elongation factor ef-1 alpha/tu (Fragment)	Amblyomma cajennense PE	380	41.4643	9.34912	3	1	17	146	25.199	24.21	8	15	25.0721	30.79	9	13	30.9192	30.26	10	20	34.4252	23.68	10	21	36.7807	24.74	9	20	31.564	26.05	9	19	16	20	1.25	0.321928	≥ 0.05	P:translational elongation; F:GTP binding; F:translation elongation factor activity
A0A023FEK9	Uncharacterized protein	Amblyomma cajennense PE	193	21.2454	9.05615	2	3	5	5	0	0	0	0	0	0	0	0	0	0	0	0	0	0	0	0	0	19.69	4	4	0	6.74	1	1	0	1.66667	#DIV/0!	#DIV/0!	≥ 0.05	P:negative regulation of endopeptidase activity; F:serine-type endopeptidase inhibitor activity
A0A023FEL5	Uncharacterized protein (Fragment)	Amblyomma cajennense PE	268	30.5118	8.66064	1	1	6	6	1.72668	11.19	3	3	0	0	0	0	0	0	0	0	0	15.3	3	3	0	0	0	0	0	0	0	0	1	1	1	0	≥ 0.05	-
A0A023FEL6	Uncharacterized protein (Fragment)	Amblyomma cajennense PE	116	13.6175	5.31299	1	1	3	3	0	0	0	0	2.02845	31.9	2	2	0	10.34	1	1	0	0	0	0	0	0	0	0	0	0	0	0	1	0	0	#NUM!	≥ 0.05	-
A0A023FEL8	Uncharacterized protein	Amblyomma cajennense PE	123	13.2698	11.8833	1	2	8	10	1.60915	24.39	3	3	0	0	0	0	0	21.14	3	3	0	0	0	0	0	0	0	0	0	0	0	0	2	0	0	#NUM!	≥ 0.05	-
A0A023FEL9	Putative scf e3 ubiquitin ligase complex f-box protein grra (Fragment)	Amblyomma cajennense PE	363	40.3987	4.76709	1	1	5	7	0	7.99	1	1	0	0	0	0	0	14.05	4	5	0	0	0	0	0	4.13	1	1	0	0	0	0	2	0.333333	0.166667	-2.58496	≥ 0.05	F:ligase activity; P:metabolic process
A0A023FEM0	Putative gag-pol polyprotein strongylocentrotus purpuratus	Amblyomma cajennense PE	137	14.9726	10.2573	1	1	2	3	0	0	0	0	1.99814	27.01	2	3	0	0	0	0	0	0	0	0	0	0	0	0	0	0	0	0	1	0	0	#NUM!	≥ 0.05	-
A0A023FEM5	Putative kazal-type serine protease inhibitor domain protein (Fragment)	Amblyomma cajennense PE	181	19.2234	8.06006	2	3	6	15	0	0	0	0	0	0	0	0	0	0	0	0	0	0	0	0	0	23.76	3	7	0	0	0	0	0	2.33333	#DIV/0!	#DIV/0!	≥ 0.05	P:proteolysis; P:regulation of cell growth; F:insulin-like growth factor binding; F:peptidase activity; C:extracellular region
A0A023FEM7	Hipothetical protein (Fragment)	Amblyomma cajennense PE	1020	113.721	7.76709	1	3	13	24	0	4.12	4	4	0	5.29	4	5	0	8.24	5	5	0	0	0	0	0	0	0	0	0	6.76	6	6	4.66667	2	0.428571	-1.22239	≥ 0.05	-
A0A023FEN4	Uncharacterized protein (Fragment)	Amblyomma cajennense PE	180	20.3153	8.49951	1	1	3	7	0	7.78	2	2	0	5.56	1	1	0	0	0	0	0	7.78	1	1	0	0	0	0	0	0	0	0	1	0.333333	0.333333	-1.58496	≥ 0.05	-
A0A023FEN5	Putative serine/threonine protein (Fragment)	Amblyomma cajennense PE	375	42.0136	7.44482	1	3	8	25	0	0	0	0	2.30159	7.2	2	2	3.97699	12.27	3	4	2.24792	9.6	4	4	5.98012	9.6	4	5	4.55078	14.93	5	7	2	5.33333	2.66667	1.41504	≥ 0.05	F:ATP binding; F:protein kinase activity; P:protein phosphorylation
A0A023FEP0	Putative frataxin	Amblyomma cajennense PE	192	21.6499	6.87354	1	1	6	9	0	0	0	0	0	6.25	1	1	0	0	0	0	0	16.67	3	3	0	0	0	0	0	16.67	2	2	0.333333	1.66667	5	2.32193	≥ 0.05	P:oxidation-reduction process; C:mitochondrion; P:iron-sulfur cluster assembly; F:ferroxidase activity; F:ferric iron binding
A0A023FEP4	Putative phosphatidylserine receptor ixodes scapularis phosphatidylserine receptor (Fragment)	Amblyomma cajennense PE	201	23.4899	9.08545	2	1	6	6	0	0	0	0	0	0	0	0	1.61557	24.38	4	4	0	0	0	0	0	0	0	0	0	0	0	0	1.33333	0	0	#NUM!	≥ 0.05	-
A0A023FEP5	Palmitoyltransferase (Fragment)	Amblyomma cajennense PE	260	30.419	8.41162	1	1	10	15	0	18.08	5	5	0	0	0	0	0	0	0	0	0	18.85	3	3	1.80404	21.54	5	5	0	0	0	0	1.66667	2.66667	1.6	0.678072	≥ 0.05	F:metal ion binding; F:protein-cysteine S-palmitoyltransferase activity; F:transferase activity; C:integral component of membrane; P:metabolic process; C:membrane; F:zinc ion binding; F:transferase activity, transferring acyl groups
A0A023FEQ0	Putative secreted protein (Fragment)	Amblyomma cajennense PE	163	18.8116	5.2876	1	1	7	12	1.70558	20.25	2	2	0	12.27	1	1	0	32.52	3	3	0	0	0	0	0	7.36	1	2	0	6.75	1	1	2	1	0.5	-1	≥ 0.05	P:negative regulation of endopeptidase activity; F:serine-type endopeptidase inhibitor activity
A0A023FER1	Putative eukaryotic translation initiation factor 3 subunit a	Amblyomma cajennense PE	270	28.914	10.6382	2	1	8	10	0	0	0	0	0	9.63	2	3	0	7.04	2	2	0	0	0	0	0	12.59	2	2	0	0	0	0	1.66667	0.666667	0.4	-1.32193	≥ 0.05	P:translational initiation; F:translation initiation factor activity
A0A023FER3	Putative lectin vip36 involved in the transport of glyco carrying high mannose-type glycans	Amblyomma cajennense PE	335	37.4595	6.91748	2	2	10	14	0	0	0	0	2.01211	14.33	4	5	0	12.84	4	4	0	13.73	3	3	0	0	0	0	0	6.27	2	2	3	1.66667	0.555556	-0.847997	≥ 0.05	F:carbohydrate binding; C:membrane
A0A023FET0	Putative family with sequence similarity 82 member b	Amblyomma cajennense PE	297	33.6275	8.60205	2	1	7	12	0	0	0	0	0	0	0	0	0	10.77	4	4	0	3.7	1	2	0	0	0	0	0	6.4	2	2	1.33333	1.33333	1	0	≥ 0.05	-
A0A023FET3	Uncharacterized protein (Fragment)	Amblyomma cajennense PE	218	25.5085	8.90967	1	1	4	6	0	26.15	3	4	0	0	0	0	0	11.01	1	1	0	0	0	0	0	0	0	0	0	11.01	1	1	1.66667	0.333333	0.2	-2.32193	≥ 0.05	-
A0A023FET5	Uncharacterized protein	Amblyomma cajennense PE	351	39.7807	5.43994	1	2	3	3	0	0	0	0	0	0	0	0	0	0	0	0	0	0	0	0	1.85887	7.98	3	3	0	0	0	0	0	1	#DIV/0!	#DIV/0!	≥ 0.05	-
A0A023FET9	Putative na+/h+ exchange regulatory cofactor nhe-rf1 (Fragment)	Amblyomma cajennense PE	410	44.6172	5.59229	1	5	10	10	0	0	0	0	0	0	0	0	0	16.34	5	5	0	11.46	3	3	0	0	0	0	0	0	0	0	1.66667	1	0.6	-0.736966	≥ 0.05	-
A0A023FEV1	Uncharacterized protein (Fragment)	Amblyomma cajennense PE	875	90.9197	9.67139	1	7	11	15	0	1.71	1	1	0	0	0	0	0	0	0	0	0	3.09	2	2	2.39108	3.66	3	3	0	1.37	1	1	0.333333	2	6	2.58496	≥ 0.05	C:nucleus
A0A023FEV4	Putative heat shock protein	Amblyomma cajennense PE	101	11.1167	8.99756	5	2	6	6	0	0	0	0	0	0	0	0	0	0	0	0	1.63219	34.65	5	5	0	0	0	0	0	0	0	0	0	1.66667	#DIV/0!	#DIV/0!	≥ 0.05	F:ATP binding; C:cytoplasm; P:protein folding
A0A023FEV7	Putative secreted protein	Amblyomma cajennense PE	88	9.74066	8.48486	1	1	2	5	0	0	0	0	0	20.45	2	2	0	0	0	0	0	0	0	0	0	0	0	0	0	0	0	0	0.666667	0	0	#NUM!	≥ 0.05	-
A0A023FEZ3	Putative secreted protein (Fragment)	Amblyomma cajennense PE	126	14.0111	10.4917	1	3	4	9	0	0	0	0	1.66995	8.73	1	1	0	0	0	0	3.44179	13.49	2	3	0	0	0	0	0	16.67	2	2	0.333333	1.66667	5	2.32193	≥ 0.05	-
A0A023FF05	Putative secreted protein	Amblyomma cajennense PE	137	15.5451	5.30029	1	2	4	14	2.26231	11.68	1	1	6.88577	17.52	2	3	2.91123	11.68	1	3	0	0	0	0	5.80607	21.9	2	3	5.76282	11.68	2	3	2.33333	2	0.857143	-0.222392	≥ 0.05	-
A0A023FF12	Uncharacterized protein	Amblyomma cajennense PE	207	22.8008	7.85498	1	1	2	4	0	0	0	0	0	0	0	0	0	16.91	2	4	0	0	0	0	0	0	0	0	0	0	0	0	1.33333	0	0	#NUM!	≥ 0.05	-
A0A023FF18	Putative 28s ribosomal protein	Amblyomma cajennense PE	239	27.4589	8.32373	1	5	13	23	0	23.43	4	4	0	15.9	2	2	2.08569	20.92	4	5	0	0	0	0	0	29.29	6	6	2.32161	22.59	3	3	3.66667	3	0.818182	-0.289507	≥ 0.05	F:structural constituent of ribosome; P:translation; C:ribosome; C:intracellular
A0A023FF23	Putative cytochrome c oxidase polypeptide iv	Amblyomma cajennense PE	179	20.7819	9.56885	1	1	4	7	0	8.38	1	1	0	20.67	3	3	0	13.97	2	2	0	0	0	0	0	8.38	1	1	0	0	0	0	2	0.333333	0.166667	-2.58496	≥ 0.05	P:hydrogen ion transmembrane transport; F:cytochrome-c oxidase activity
A0A023FF24	Putative wasp (Fragment)	Amblyomma cajennense PE	269	28.481	10.1987	1	2	6	7	0	0	0	0	0	0	0	0	0	0	0	0	0	7.81	1	1	0	21.19	3	4	0	0	0	0	0	1.66667	#DIV/0!	#DIV/0!	≥ 0.05	-
A0A023FF37	Uncharacterized protein (Fragment)	Amblyomma cajennense PE	325	34.558	8.14795	1	1	4	4	0	0	0	0	0	5.23	2	2	0	0	0	0	0	12.92	2	2	0	0	0	0	0	0	0	0	0.666667	0.666667	1	0	≥ 0.05	-
A0A023FF41	Putative 40s ribosomal protein s3a (Fragment)	Amblyomma cajennense PE	181	20.2014	9.0415	1	3	10	19	2.48461	31.49	4	4	3.00616	29.28	4	5	0	19.89	2	3	0	0	0	0	2.44061	8.29	1	1	3.52052	7.73	1	2	4	1	0.25	-2	≥ 0.05	F:structural constituent of ribosome; P:translation; C:ribosome; C:intracellular
A0A023FF43	Putative muscle myosin heavy chain ixodes scapularis muscle myosin heavy chain (Fragment)	Amblyomma cajennense PE	345	37.847	5.05908	1	2	17	38	0	14.49	6	9	0	8.99	2	2	0	4.64	1	1	0	8.12	2	3	2.04089	14.2	4	5	0	13.91	4	6	4	4.66667	1.16667	0.222392	≥ 0.05	-
A0A023FF51	Uncharacterized protein (Fragment)	Amblyomma cajennense PE	123	13.7303	9.80322	1	1	2	12	3.84674	7.32	1	2	2.30399	9.76	2	2	2.63931	7.32	1	1	2.17517	7.32	1	1	2.38479	7.32	1	1	4.09102	7.32	1	2	1.66667	1.33333	0.8	-0.321928	≥ 0.05	F:structural constituent of cell wall
A0A023FF58	Putative secreted protein (Fragment)	Amblyomma cajennense PE	186	19.3909	8.70459	1	1	2	2	0	0	0	0	0	0	0	0	0	0	0	0	0	0	0	0	1.65226	9.68	2	2	0	0	0	0	0	0.666667	#DIV/0!	#DIV/0!	≥ 0.05	-
A0A023FFA2	Putative lipocalin-5 1	Amblyomma cajennense PE	220	25.4851	5.2749	2	1	4	6	0	0	0	0	2.04348	5.45	1	1	0	0	0	0	0	0	0	0	0	22.27	3	4	0	0	0	0	0.333333	1.33333	4	2	≥ 0.05	F:amine binding; P:evasion or tolerance of host defense response
A0A023FFA5	Putative ribosomal protein s4	Amblyomma cajennense PE	192	22.5923	10.6382	1	3	19	42	3.82789	15.63	4	5	15.1843	23.44	6	9	10.0049	31.25	10	13	6.06151	31.77	7	7	0	0	0	0	1.68658	23.96	4	4	9	3.66667	0.407407	-1.29546	≥ 0.05	F:structural constituent of ribosome; F:RNA binding; P:translation; C:small ribosomal subunit; C:ribonucleoprotein complex; C:ribosome; F:rRNA binding; C:intracellular
A0A023FFA6	Putative secreted protein	Amblyomma cajennense PE	222	24.2279	5.49072	1	2	3	7	0	22.07	2	2	0	11.71	1	2	0	0	0	0	0	11.71	1	1	0	10.81	1	2	0	0	0	0	1.33333	1	0.75	-0.415037	≥ 0.05	-
A0A023FFA9	Serine/threonine-protein phosphatase (Fragment)	Amblyomma cajennense PE	193	21.9091	6.18896	1	1	8	15	2.1579	18.13	2	4	4.92538	22.8	3	4	0	0	0	0	0	0	0	0	0	0	0	0	5.69813	13.99	2	2	2.66667	0.666667	0.25	-2	≥ 0.05	F:hydrolase activity; P:metabolic process; P:protein dephosphorylation; F:phosphoprotein phosphatase activity
A0A023FFB1	Putative secreted protein	Amblyomma cajennense PE	121	13.5237	9.1001	1	1	6	7	0	0	0	0	0	0	0	0	0	0	0	0	0	34.71	3	3	0	0	0	0	0	7.44	1	1	0	1.33333	#DIV/0!	#DIV/0!	≥ 0.05	P:negative regulation of endopeptidase activity; F:serine-type endopeptidase inhibitor activity
A0A023FFE8	Putative secreted protein (Fragment)	Amblyomma cajennense PE	162	17.0421	8.33838	1	1	3	3	0	0	0	0	0	0	0	0	0	25.93	3	3	0	0	0	0	0	0	0	0	0	0	0	0	1	0	0	#NUM!	≥ 0.05	-
A0A023FFG7	Putative cytochrome c oxidase assembly protein	Amblyomma cajennense PE	292	33.4897	9.01221	1	1	5	6	0	6.51	2	2	0	0	0	0	0	0	0	0	0	0	0	0	0	10.27	2	2	0	0	0	0	0.666667	0.666667	1	0	≥ 0.05	-
A0A023FFI0	Putative secreted protein 94	Amblyomma cajennense PE	194	21.67	8.67529	1	3	5	33	7.06868	25.26	3	5	10.0928	10.31	1	4	14.5974	10.31	1	6	4.83332	10.31	1	2	9.46161	32.99	3	6	4.75542	15.46	2	3	5	3.66667	0.733333	-0.447459	≥ 0.05	-
A0A023FFI4	Uncharacterized protein (Fragment)	Amblyomma cajennense PE	151	16.743	8.29443	1	1	8	11	0	27.15	2	2	0	0	0	0	0	17.88	2	2	0	0	0	0	1.60209	27.81	4	5	0	23.18	2	2	1.33333	2.33333	1.75	0.807355	≥ 0.05	F:metal ion binding; F:zinc ion binding
A0A023FFI6	Putative 60s ribosomal protein l22 (Fragment)	Amblyomma cajennense PE	205	23.6006	10.6675	10	0	11	20	0	0	0	0	4.52147	22.93	6	6	2.22784	4.88	1	1	2.41503	16.1	3	3	0	0	0	0	0	21.46	3	3	2.33333	2	0.857143	-0.222392	≥ 0.05	F:structural constituent of ribosome; P:translation; C:large ribosomal subunit; C:ribonucleoprotein complex; C:ribosome; C:intracellular
A0A023FFI9	Peptidyl-prolyl cis-trans isomerase	Amblyomma cajennense PE	201	21.569	9.49561	4	1	5	20	2.96138	27.36	3	3	6.49281	4.48	1	2	7.75154	16.92	2	4	8.36702	4.48	1	3	6.21723	4.48	1	2	6.04895	4.48	1	2	3	2.33333	0.777778	-0.36257	≥ 0.05	F:peptidyl-prolyl cis-trans isomerase activity; P:protein folding; P:protein peptidyl-prolyl isomerization; F:isomerase activity
A0A023FFJ4	Uncharacterized protein	Amblyomma cajennense PE	206	23.3022	8.67529	1	3	7	10	0	0	0	0	0	18.45	2	2	0	0	0	0	0	0	0	0	0	0	0	0	0	7.28	1	1	0.666667	0.333333	0.5	-1	≥ 0.05	P:negative regulation of endopeptidase activity; F:serine-type endopeptidase inhibitor activity
A0A023FFJ6	Putative tick til 23	Amblyomma cajennense PE	209	23.5354	8.95361	2	2	12	26	0	0	0	0	0	28.71	4	5	0	18.18	2	2	3.7307	40.67	6	8	0	28.23	3	4	0	0	0	0	2.33333	4	1.71429	0.777608	≥ 0.05	-
A0A023FFJ9	Putative m phase phosphoprotein 6	Amblyomma cajennense PE	152	17.7812	9.83252	1	1	2	2	0	0	0	0	0	10.53	2	2	0	0	0	0	0	0	0	0	0	0	0	0	0	0	0	0	0.666667	0	0	#NUM!	≥ 0.05	-
A0A023FFL3	Putative ubiquitin protein	Amblyomma cajennense PE	209	23.1655	7.62061	3	3	6	8	0	0	0	0	0	0	0	0	2.06053	19.62	2	2	0	0	0	0	0	14.83	3	3	0	15.31	2	3	0.666667	2	3	1.58496	≥ 0.05	F:ligase activity; P:metabolic process
A0A023FFN4	Uncharacterized protein (Fragment)	Amblyomma cajennense PE	189	20.7097	9.14404	1	2	5	5	0	20.63	2	2	0	0	0	0	0	0	0	0	0	17.46	2	2	0	0	0	0	1.67613	5.82	1	1	0.666667	1	1.5	0.584963	≥ 0.05	-
A0A023FFN8	Golgi SNAP receptor complex member 2	Amblyomma cajennense PE	213	24.6317	8.82178	1	6	9	14	0	16.9	2	2	0	27.7	4	4	1.28583	12.68	2	2	2.04545	5.16	1	1	2.03718	16.9	2	2	0	7.98	1	1	2.66667	1.33333	0.5	-1	≥ 0.05	P:membrane fusion; F:SNAP receptor activity; C:Golgi apparatus; P:transport
A0A023FFP0	Putative phospholipase a2 ixodes scapularis phospholipase a2 (Fragment)	Amblyomma cajennense PE	295	33.3189	9.81787	2	1	11	20	0	0	0	0	0	0	0	0	1.6946	13.9	3	4	2.01948	15.93	4	5	1.9224	3.73	1	1	0	16.95	5	5	1.33333	3.66667	2.75	1.45943	≥ 0.05	F:phospholipase A2 activity; F:calcium ion binding; P:lipid catabolic process; C:extracellular region
A0A023FFP1	Uncharacterized protein (Fragment)	Amblyomma cajennense PE	203	21.9254	6.3667	1	1	3	4	0	18.72	2	2	0	9.36	1	1	0	0	0	0	0	0	0	0	0	0	0	0	0	0	0	0	1	0	0	#NUM!	≥ 0.05	-
A0A023FFP2	Putative k-cl cotransporter (Fragment)	Amblyomma cajennense PE	158	16.8067	4.76709	1	2	3	8	0	0	0	0	2.31407	25.95	2	3	0	8.86	1	1	0	10.76	1	1	0	0	0	0	0	19.62	2	3	1.33333	1.33333	1	0	≥ 0.05	C:membrane; P:transmembrane transport; P:transport
A0A023FFP6	Putative vacuolar assembly/sorting protein (Fragment)	Amblyomma cajennense PE	159	17.3299	5.78271	1	1	7	9	0	0	0	0	1.71234	16.98	2	2	0	0	0	0	0	0	0	0	0	22.64	3	3	0	0	0	0	0.666667	1	1.5	0.584963	≥ 0.05	P:vacuolar transport; C:intracellular
A0A023FFP7	Putative ubiquitin protein (Fragment)	Amblyomma cajennense PE	215	24.107	7.57666	1	1	5	11	0	0	0	0	0	18.14	3	4	0	13.95	2	3	0	0	0	0	0	0	0	0	0	0	0	0	2.33333	0	0	#NUM!	≥ 0.05	-
A0A023FFP9	Putative flotillin (Fragment)	Amblyomma cajennense PE	378	41.9959	5.42725	3	1	21	28	1.84967	25.13	5	5	0	0	0	0	0	20.11	4	4	1.65812	21.43	6	8	0	0	0	0	4.63141	23.54	6	6	3	4.66667	1.55556	0.63743	≥ 0.05	-
A0A023FFQ3	Uncharacterized protein	Amblyomma cajennense PE	237	27.2347	10.6968	1	1	7	12	0	0	0	0	0	0	0	0	0	0	0	0	1.75107	16.03	4	5	0	11.39	3	3	0	2.95	1	1	0	3	#DIV/0!	#DIV/0!	≥ 0.05	-
A0A023FFQ5	Putative prefoldin subunit 5	Amblyomma cajennense PE	161	17.628	7.23975	1	2	6	11	0	34.78	4	4	0	0	0	0	0	9.32	1	2	2.34318	25.47	2	2	2.23042	7.45	1	1	0	0	0	0	2	1	0.5	-1	≥ 0.05	F:unfolded protein binding; P:protein folding; C:prefoldin complex
A0A023FFR9	Putative eukaryotic translation initiation factor 3 subunit a	Amblyomma cajennense PE	289	31.0752	6.31592	1	1	3	6	0	0	0	0	0	4.15	1	1	0	11.07	3	5	0	0	0	0	0	0	0	0	0	0	0	0	2	0	0	#NUM!	≥ 0.05	P:translational initiation; F:translation initiation factor activity
A0A023FFS4	Putative transcription factor	Amblyomma cajennense PE	217	23.4328	4.7417	5	1	13	28	5.24038	15.67	3	3	6.28439	20.74	3	4	3.4666	26.27	4	5	4.89671	12.44	2	2	0	20.74	4	5	4.51836	19.82	3	5	4	4	1	0	≥ 0.05	-
A0A023FFT1	Putative g protein (Fragment)	Amblyomma cajennense PE	378	43.9612	7.28369	2	3	15	32	3.60126	6.35	3	3	0	0	0	0	2.08592	19.58	4	7	1.94575	12.17	4	4	0	0	0	0	2.01536	20.37	6	6	3.33333	3.33333	1	0	≥ 0.05	F:guanyl nucleotide binding; F:G-protein coupled receptor binding; F:G-protein beta/gamma-subunit complex binding; F:nucleotide binding; F:GTP binding; P:signal transduction; F:signal transducer activity; P:metabolic process; F:GTPase activity; P:G-protein coupled receptor signaling pathway
A0A023FFT7	Putative outcast ele5 orf2-h 1e-60-j 4	Amblyomma cajennense PE	423	46.8727	9.75928	1	8	23	46	0	24.11	8	9	2.01327	13.24	6	6	0	7.8	4	4	2.2913	14.66	6	8	0	7.57	3	4	2.15694	5.44	2	5	6.33333	5.66667	0.894737	-0.160465	≥ 0.05	-
A0A023FFU3	Putative sterol carrier protein (Fragment)	Amblyomma cajennense PE	503	55.5201	8.54346	1	2	7	9	0	0	0	0	0	0	0	0	1.87245	2.58	2	2	0	4.77	3	3	2.31816	10.34	4	4	0	0	0	0	0.666667	2.33333	3.5	1.80735	≥ 0.05	-
A0A023FFU6	Uncharacterized protein (Fragment)	Amblyomma cajennense PE	220	24.2837	9.56885	1	1	6	12	0	0	0	0	0	6.82	1	1	0	0	0	0	0	13.18	2	2	0	11.36	2	2	0	13.64	3	4	0.333333	2.66667	8	3	≥ 0.05	P:protein import into mitochondrial matrix; C:mitochondrial inner membrane presequence translocase complex
A0A023FFV0	Putative splicing factor sc35 ixodes scapularis splicing factor sc35	Amblyomma cajennense PE	220	24.8533	8.77783	1	2	8	11	0	10.45	2	2	0	0	0	0	0	0	0	0	2.01852	4.09	1	1	1.66642	19.09	3	4	0	21.36	3	3	0.666667	2.66667	4	2	≥ 0.05	F:metal ion binding; F:nucleic acid binding; F:nucleotide binding; F:zinc ion binding
A0A023FFV8	Putative glycosylphosphatidylinositol anchor synthesis protein (Fragment)	Amblyomma cajennense PE	306	35.0035	8.6167	1	1	4	11	0	0	0	0	0	0	0	0	2.14525	11.11	2	6	0	0	0	0	0	4.25	1	1	0	0	0	0	2	0.333333	0.166667	-2.58496	≥ 0.05	-
A0A023FFW5	Proteasome subunit alpha type (Fragment)	Amblyomma cajennense PE	221	24.3153	7.29834	1	1	12	29	1.99616	20.36	4	4	7.77029	19.91	5	5	0	0	0	0	6.66483	19	4	6	3.77063	15.38	4	5	1.83714	11.76	3	3	3	4.66667	1.55556	0.63743	≥ 0.05	P:proteolysis involved in cellular protein catabolic process; C:proteasome core complex, alpha-subunit complex; F:endopeptidase activity; F:hydrolase activity; C:nucleus; C:cytoplasm; F:threonine-type endopeptidase activity; C:proteasome core complex; C:proteasome complex; P:ubiquitin-dependent protein catabolic process; F:peptidase activity; P:proteolysis
A0A023FFW6	Putative na+-independent cl/hco3 exchanger ae1	Amblyomma cajennense PE	199	22.3028	7.00537	1	2	3	5	0	0	0	0	0	0	0	0	0	9.55	1	1	0	0	0	0	0	16.08	2	2	0	0	0	0	0.333333	0.666667	2	1	≥ 0.05	P:anion transport; P:anion transmembrane transport; F:inorganic anion exchanger activity; C:integral component of membrane; C:membrane
A0A023FFW7	Putative alkyl hydroperoxide reductase thiol specific antioxidant	Amblyomma cajennense PE	233	25.6125	8.67529	2	2	12	29	3.95581	15.45	3	3	9.17195	24.03	4	4	4.87869	18.45	4	4	1.7544	9.87	3	3	0	29.61	4	4	4.01476	14.16	3	3	3.66667	3.33333	0.909091	-0.137504	≥ 0.05	P:oxidation-reduction process; F:oxidoreductase activity; F:antioxidant activity; F:peroxiredoxin activity
A0A023FFY2	Putative cytochrome p450 4w1 (Fragment)	Amblyomma cajennense PE	305	34.6798	8.29443	1	1	3	4	0	0	0	0	0	6.56	2	2	0	0	0	0	0	0	0	0	0	0	0	0	0	0	0	0	0.666667	0	0	#NUM!	≥ 0.05	P:oxidation-reduction process; F:oxidoreductase activity, acting on paired donors, with incorporation or reduction of molecular oxygen; F:heme binding; F:iron ion binding; F:monooxygenase activity
A0A023FFZ6	Putative electron transfer flavoprotein alpha subunit	Amblyomma cajennense PE	340	35.5036	8.27979	1	1	19	66	13.9476	25.88	8	9	14.4382	22.65	7	8	11.1281	23.24	6	7	9.2804	27.94	7	8	7.28989	22.35	5	8	11.1223	25.59	8	9	8	8.33333	1.04167	0.0588937	≥ 0.05	F:electron carrier activity; F:flavin adenine dinucleotide binding
A0A023FFZ8	Putative vesicle transport protein (Fragment)	Amblyomma cajennense PE	226	25.9743	7.75244	2	2	8	16	0	9.73	2	2	0	3.54	1	1	1.62935	20.35	4	4	0	0	0	0	1.65985	21.24	4	4	1.2839	12.83	3	3	2.33333	2.33333	1	0	≥ 0.05	-
A0A023FG03	Uncharacterized protein (Fragment)	Amblyomma cajennense PE	226	24.6702	4.71631	1	1	5	9	2.30614	15.93	2	2	0	0	0	0	0	21.24	2	2	0	0	0	0	0	0	0	0	0	0	0	0	1.33333	0	0	#NUM!	≥ 0.05	F:transcription factor binding
A0A023FG08	Putative secreted protein	Amblyomma cajennense PE	136	15.3371	5.32568	1	5	9	21	1.85234	8.82	1	1	2.27344	29.41	3	5	0	14.71	1	1	0	8.82	1	2	0	41.18	5	6	0	32.35	3	3	2.33333	3.66667	1.57143	0.652077	≥ 0.05	-
A0A023FG14	Glucose-6-phosphate 1-dehydrogenase	Amblyomma cajennense PE	538	60.871	6.94678	3	2	10	11	0	0	0	0	0	0	0	0	0	5.58	3	3	0	4.83	2	2	1.90539	6.13	4	4	1.75977	4.09	2	2	1	2.66667	2.66667	1.41504	≥ 0.05	P:oxidation-reduction process; P:glucose metabolic process; F:oxidoreductase activity; F:glucose-6-phosphate dehydrogenase activity; P:carbohydrate metabolic process; P:pentose-phosphate shunt; F:NADP binding
A0A023FG21	Putative vacuolar h+-atpase v0 sector subunit a	Amblyomma cajennense PE	848	96.1427	6.56592	3	1	16	23	1.63287	5.07	4	4	0	0	0	0	1.86094	6.49	5	5	1.77657	9.79	7	7	0	0	0	0	1.20612	3.18	3	4	3	3.66667	1.22222	0.289507	≥ 0.05	C:integral component of membrane; C:membrane; C:vacuolar proton-transporting V-type ATPase, V0 domain; P:ion transport; P:transport; F:hydrogen ion transmembrane transporter activity; C:proton-transporting V-type ATPase, V0 domain; P:proton transport; P:ATP hydrolysis coupled proton transport
A0A023FG23	Uncharacterized protein	Amblyomma cajennense PE	156	18.4582	9.43701	1	1	2	2	0	0	0	0	0	0	0	0	0	0	0	0	0	18.59	2	2	0	0	0	0	0	0	0	0	0	0.666667	#DIV/0!	#DIV/0!	≥ 0.05	P:negative regulation of endopeptidase activity; F:serine-type endopeptidase inhibitor activity
A0A023FG31	Putative scf ubiquitin ligase rbx1 component ixodes scapularis scf ubiquitin ligase rbx1 component	Amblyomma cajennense PE	105	12.2596	5.49072	3	1	7	13	0	0	0	0	0	39.05	2	2	1.96217	39.05	4	4	0	0	0	0	0	42.86	3	6	0	0	0	0	2	2	1	0	≥ 0.05	F:metal ion binding; F:ligase activity; P:metabolic process; F:zinc ion binding
A0A023FG41	Putative mitochondrial import inner membrane translocase subunit tim8	Amblyomma cajennense PE	68	7.70919	9.87646	8	1	3	3	0	0	0	0	0	0	0	0	0	0	0	0	0	0	0	0	0	35.29	2	2	0	0	0	0	0	0.666667	#DIV/0!	#DIV/0!	≥ 0.05	P:protein targeting; P:protein transmembrane transport; C:membrane; P:intracellular protein transport; F:P-P-bond-hydrolysis-driven protein transmembrane transporter activity; P:protein transport; C:intracellular
A0A023FG42	Uncharacterized protein (Fragment)	Amblyomma cajennense PE	182	20.6581	8.85107	1	1	3	4	0	0	0	0	0	16.48	2	2	1.876	7.69	1	1	0	14.29	1	1	0	0	0	0	0	0	0	0	1	0.333333	0.333333	-1.58496	≥ 0.05	P:negative regulation of endopeptidase activity; F:serine-type endopeptidase inhibitor activity
A0A023FG49	Putative 28s ribosomal protein	Amblyomma cajennense PE	171	19.3384	9.68604	1	1	4	6	1.66277	13.45	2	2	0	0	0	0	0	19.88	3	4	0	0	0	0	0	0	0	0	0	0	0	0	2	0	0	#NUM!	≥ 0.05	F:structural constituent of ribosome; P:translation; C:ribosome; C:intracellular
A0A023FG67	Putative ribosomal protein	Amblyomma cajennense PE	115	12.9322	10.1841	1	2	6	18	4.2996	23.48	2	2	7.19412	18.26	3	4	5.33495	18.26	3	3	2.03708	18.26	2	2	0	18.26	2	2	2.82846	20	2	2	3	2	0.666667	-0.584963	≥ 0.05	C:ribosome
A0A023FG94	Putative lipocalin-3 1	Amblyomma cajennense PE	212	23.5682	8.90967	1	1	8	14	2.61462	21.7	2	2	0	0	0	0	4.45008	33.49	4	6	0	0	0	0	2.51756	20.28	2	2	0	32.55	4	4	2.66667	2	0.75	-0.415037	≥ 0.05	-
A0A023FG97	Putative nuclear transport receptor exportin 4 importin beta superfamily (Fragment)	Amblyomma cajennense PE	182	20.0155	5.10986	1	2	4	10	0	3.85	1	2	0	0	0	0	0	17.03	3	3	1.60051	3.85	1	1	0	12.09	2	2	0	3.85	1	2	1.66667	1.66667	1	0	≥ 0.05	-
A0A023FGB8	Putative e3 ubiquitin-protein ligase herc2 (Fragment)	Amblyomma cajennense PE	186	20.7295	5.19873	2	1	3	5	0	0	0	0	0	0	0	0	0	11.29	1	1	0	5.91	1	2	0	11.29	2	2	0	0	0	0	0.333333	1.33333	4	2	≥ 0.05	F:ligase activity; P:metabolic process; P:protein ubiquitination; F:ubiquitin-protein transferase activity
A0A023FGE5	Eukaryotic translation initiation factor 3 subunit K	Amblyomma cajennense PE	231	26.2994	5.43994	2	2	5	5	0	18.18	3	3	0	13.42	1	1	0	0	0	0	0	0	0	0	0	6.49	1	1	0	0	0	0	1.33333	0.333333	0.25	-2	≥ 0.05	C:eukaryotic translation initiation factor 3 complex; P:regulation of translational initiation; P:translational initiation; C:cytoplasm; P:translation; C:eukaryotic 43S preinitiation complex; F:RNA binding; F:ribosome binding; P:formation of translation preinitiation complex; F:translation initiation factor activity; C:eukaryotic 48S preinitiation complex
A0A023FGF8	Zinc finger Ran-binding domain-containing protein 2	Amblyomma cajennense PE	234	25.9616	4.67822	2	1	8	21	0	10.68	2	3	0	19.23	3	3	2.01016	21.79	3	3	1.72546	18.38	4	6	1.69998	12.82	3	3	0	0	0	0	3	3	1	0	≥ 0.05	F:metal ion binding; F:RNA binding; F:zinc ion binding; C:nucleus
A0A023FGH2	Putative ribonuclease t2 ixodes scapularis ribonuclease t2 (Fragment)	Amblyomma cajennense PE	192	21.8508	8.74854	1	1	4	6	0	0	0	0	0	0	0	0	1.68763	24.48	3	4	0	0	0	0	0	0	0	0	0	15.63	2	2	1.33333	0.666667	0.5	-1	≥ 0.05	F:RNA binding; P:RNA phosphodiester bond hydrolysis, endonucleolytic; F:ribonuclease T2 activity
A0A023FGH8	Putative cytochrome c oxid	Amblyomma cajennense PE	223	25.2518	8.23584	1	2	6	9	0	0	0	0	0	13	3	3	0	6.73	1	1	0	12.56	3	3	0	0	0	0	0	6.73	1	1	1.33333	1.33333	1	0	≥ 0.05	F:copper ion binding
A0A023FGI8	Putative peptidase family m13 (Fragment)	Amblyomma cajennense PE	414	46.7692	5.75732	1	2	6	7	0	0	0	0	0	0	0	0	0	15.94	4	4	0	0	0	0	0	0	0	0	0	0	0	0	1.33333	0	0	#NUM!	≥ 0.05	P:proteolysis; F:metalloendopeptidase activity
A0A023FGL0	Putative stathmin (Fragment)	Amblyomma cajennense PE	244	28.3425	8.6167	2	4	17	31	0	39.75	8	8	0	0	0	0	0	0	0	0	3.47566	19.26	5	5	1.76809	9.02	3	3	3.39768	15.57	4	4	2.66667	4	1.5	0.584963	≥ 0.05	P:regulation of microtubule polymerization or depolymerization
A0A023FGL4	Innexin (Fragment)	Amblyomma cajennense PE	205	24.3566	8.86572	1	1	2	3	0	16.59	2	3	0	0	0	0	0	0	0	0	0	0	0	0	0	0	0	0	0	0	0	0	1	0	0	#NUM!	≥ 0.05	C:cell junction; C:integral component of membrane; C:membrane; P:ion transport; P:transport; C:gap junction
A0A023FGL5	Eukaryotic translation initiation factor 6	Amblyomma cajennense GN	245	26.3383	4.81787	7	1	3	9	0	0	0	0	3.86439	13.06	2	3	0	0	0	0	0	0	0	0	1.62341	5.71	1	1	0	15.51	2	2	1	1	1	0	≥ 0.05	P:mature ribosome assembly; P:ribosome biogenesis; C:nucleus; P:translational initiation; C:cytoplasm; P:translation; P:ribosomal large subunit biogenesis; F:ribosomal large subunit binding; F:ribosome binding; C:nucleolus; F:translation initiation factor activity
A0A023FGN1	Putative thiamine pyrophosphate-requiring enzyme (Fragment)	Amblyomma cajennense PE	276	29.0857	8.54346	1	1	3	3	0	0	0	0	0	5.07	1	1	0	0	0	0	0	0	0	0	0	14.49	2	2	0	0	0	0	0.333333	0.666667	2	1	≥ 0.05	F:thiamine pyrophosphate binding
A0A023FGP5	Uncharacterized protein (Fragment)	Amblyomma cajennense PE	251	27.3015	7.53271	1	1	2	2	0	0	0	0	0	0	0	0	0	0	0	0	0	14.74	2	2	0	0	0	0	0	0	0	0	0	0.666667	#DIV/0!	#DIV/0!	≥ 0.05	P:oxidation-reduction process; F:oxidoreductase activity
A0A023FGQ2	Putative ribosomal protein	Amblyomma cajennense PE	148	16.807	10.521	5	1	5	10	1.62859	5.41	1	1	2.17146	5.41	1	1	1.93616	17.57	3	3	0	9.46	1	1	0	0	0	0	4.05342	29.05	4	4	1.66667	1.66667	1	0	≥ 0.05	F:structural constituent of ribosome; P:translation; C:large ribosomal subunit; C:ribonucleoprotein complex; C:ribosome; C:intracellular
A0A023FGR0	Putative rab	Amblyomma cajennense PE	125	14.1229	5.98584	1	1	4	4	0	0	0	0	0	0	0	0	0	0	0	0	1.60692	7.2	2	2	0	0	0	0	0	0	0	0	0	0.666667	#DIV/0!	#DIV/0!	≥ 0.05	P:small GTPase mediated signal transduction; P:positive regulation of GTPase activity; C:intracellular; F:guanyl-nucleotide exchange factor activity
A0A023FGR1	40S ribosomal protein S8 (Fragment)	Amblyomma cajennense PE	203	23.2249	10.4624	1	2	14	46	6.5352	11.82	2	4	8.14752	23.15	4	5	10.4104	28.08	6	8	4.6575	24.14	3	4	6.13141	13.3	2	5	10.2131	35.96	6	9	5.66667	6	1.05882	0.0824622	≥ 0.05	F:structural constituent of ribosome; P:translation; C:ribonucleoprotein complex; C:ribosome; C:intracellular
A0A023FGS0	Uncharacterized protein	Amblyomma cajennense PE	205	23.5314	4.81787	1	4	5	17	2.3529	22.44	3	3	0	19.02	2	2	3.58084	27.32	3	3	3.59377	15.12	2	2	0	7.32	1	1	0	7.8	1	2	2.66667	1.66667	0.625	-0.678072	≥ 0.05	F:nucleic acid binding; F:methyltransferase activity; P:methylation
A0A023FGS2	Putative zn2+-binding dehydrogenase nuclear receptor binding factor-1 (Fragment)	Amblyomma cajennense PE	253	28.0753	9.05615	1	1	2	2	0	0	0	0	0	0	0	0	0	7.91	2	2	0	0	0	0	0	0	0	0	0	0	0	0	0.666667	0	0	#NUM!	≥ 0.05	P:oxidation-reduction process; F:oxidoreductase activity; F:zinc ion binding
A0A023FGS5	Putative yy1 transcription factor b (Fragment)	Amblyomma cajennense PE	206	23.0951	8.23584	2	4	6	6	2.45632	11.65	2	2	0	26.21	4	4	0	0	0	0	0	0	0	0	0	0	0	0	0	0	0	0	2	0	0	#NUM!	≥ 0.05	F:metal ion binding; F:nucleic acid binding
A0A023FGS7	Putative mitochondrial ribosomal protein (Fragment)	Amblyomma cajennense PE	253	28.8633	9.84717	1	1	6	8	0	0	0	0	2.30861	3.95	1	1	0	13.83	3	3	0	0	0	0	0	0	0	0	1.8357	15.42	4	4	1.33333	1.33333	1	0	≥ 0.05	C:ribosome
A0A023FGT1	Putative flavonol reductase/cinnamoyl-coa reductase	Amblyomma cajennense PE	206	22.4125	6.53662	1	1	5	5	0	18.45	2	2	0	0	0	0	0	0	0	0	0	0	0	0	0	9.71	1	1	0	6.31	1	1	0.666667	0.666667	1	0	≥ 0.05	-
A0A023FGT5	Putative wd-repeat protein (Fragment)	Amblyomma cajennense PE	209	22.6613	5.56689	1	1	2	3	0	0	0	0	0	0	0	0	0	25.36	2	2	0	0	0	0	0	14.35	1	1	0	0	0	0	0.666667	0.333333	0.5	-1	≥ 0.05	-
A0A023FGT7	Putative hsp90 co-chaperone cns1 ixodes scapularis hsp90 co-chaperone cns1 (Fragment)	Amblyomma cajennense PE	255	29.7399	7.25439	1	2	6	11	1.64054	15.29	3	3	0	9.8	2	3	0	5.88	1	1	0	0	0	0	0	9.8	1	1	0	0	0	0	2.33333	0.333333	0.142857	-2.80735	≥ 0.05	-
A0A023FGV2	Uncharacterized protein (Fragment)	Amblyomma cajennense PE	257	28.9066	6.03662	3	1	8	13	0	0	0	0	0	0	0	0	0	0	0	0	2.4489	15.18	4	4	1.67936	3.11	1	1	0	22.96	4	4	0	3	#DIV/0!	#DIV/0!	≥ 0.05	-
A0A023FGV3	Putative inner membrane prote	Amblyomma cajennense PE	155	17.326	9.61279	1	3	5	5	0	0	0	0	0	0	0	0	0	0	0	0	0	0	0	0	0	12.9	2	2	0	0	0	0	0	0.666667	#DIV/0!	#DIV/0!	≥ 0.05	P:proteolysis; C:mitochondrion; P:protein processing involved in protein targeting to mitochondrion; F:serine-type peptidase activity; F:hydrolase activity; C:membrane; F:peptidase activity; C:mitochondrial inner membrane
A0A023FGV8	Putative ubiquitin/40s ribosomal protein s27a fusion	Amblyomma cajennense PE	156	17.9635	9.67139	3	1	16	45	11.6011	44.23	7	8	12.0571	21.79	3	5	9.54111	39.74	7	7	11.7433	25.64	4	5	7.77676	27.56	5	5	7.07659	34.62	4	4	6.66667	4.66667	0.7	-0.514573	≥ 0.05	F:structural constituent of ribosome; P:translation; C:ribosome
A0A023FGX2	Putative mitochondrial intermembrane space protein transporter complex	Amblyomma cajennense PE	139	15.6667	7.2251	1	3	12	22	1.88044	10.79	1	2	1.90537	20.86	2	3	0	0	0	0	0	43.17	6	7	0	22.3	3	3	0	0	0	0	1.66667	3.33333	2	1	≥ 0.05	-
A0A023FGY1	Uncharacterized protein	Amblyomma cajennense PE	161	18.1223	9.36377	1	1	3	4	0	0	0	0	0	0	0	0	0	30.43	3	4	0	0	0	0	0	0	0	0	0	0	0	0	1.33333	0	0	#NUM!	≥ 0.05	-
A0A023FGY2	Uncharacterized protein	Amblyomma cajennense PE	215	23.9935	8.35303	1	1	13	17	0	19.07	2	2	0	0	0	0	0	24.19	3	3	0	28.37	4	4	3.20395	24.19	5	6	0	18.14	2	2	1.66667	4	2.4	1.26303	≥ 0.05	F:metal ion binding; F:zinc ion binding
A0A023FGY9	Putative ubiquinone biosynthesis methyltransferase coq5 (Fragment)	Amblyomma cajennense PE	263	29.9713	7.45947	3	4	7	7	0	0	0	0	0	0	0	0	0	17.49	4	4	0	0	0	0	0	0	0	0	0	0	0	0	1.33333	0	0	#NUM!	≥ 0.05	F:methyltransferase activity; F:transferase activity; P:methylation
A0A023FGZ2	Putative autophagy protein 5	Amblyomma cajennense PE	143	17.0074	6.7124	1	1	2	2	0	0	0	0	0	26.57	2	2	0	0	0	0	0	0	0	0	0	0	0	0	0	0	0	0	0.666667	0	0	#NUM!	≥ 0.05	C:pre-autophagosomal structure membrane; P:autophagy; C:cytoplasm; C:membrane
A0A023FGZ3	Putative cop9 signalosome subunit csn7	Amblyomma cajennense PE	264	29.5842	7.1958	4	5	13	17	1.70575	20.08	4	4	1.82232	8.33	2	2	1.66273	10.23	2	2	0	13.64	3	3	0	0	0	0	0	14.02	3	3	2.66667	2	0.75	-0.415037	≥ 0.05	-
A0A023FGZ8	Putative nadh dehydrogenase	Amblyomma cajennense PE	145	17.636	7.29834	2	1	3	6	0	14.48	2	2	0	0	0	0	0	22.76	2	2	0	0	0	0	0	0	0	0	0	14.48	2	2	1.33333	0.666667	0.5	-1	≥ 0.05	-
A0A023FH16	Uncharacterized protein	Amblyomma cajennense PE	271	30.1266	4.62744	2	1	6	15	0	0	0	0	0	0	0	0	0	13.28	2	5	0	0	0	0	0	12.92	2	2	0	17.71	3	3	1.66667	1.66667	1	0	≥ 0.05	-
A0A023FH26	Putative 60s ribosomal protein l10	Amblyomma cajennense PE	220	25.5423	10.0522	3	2	7	8	0	0	0	0	2.05506	16.36	3	3	0	0	0	0	0	22.27	3	3	0	0	0	0	0	16.82	2	2	1	1.66667	1.66667	0.736966	≥ 0.05	F:structural constituent of ribosome; P:translation; C:ribosome; C:intracellular
A0A023FH32	Putative transcriptional co-repressor component	Amblyomma cajennense PE	152	17.2346	8.63135	5	2	8	9	0	15.79	3	3	0	0	0	0	0	0	0	0	0	15.79	2	2	0	27.63	3	3	0	0	0	0	1	1.66667	1.66667	0.736966	≥ 0.05	-
A0A023FH33	Putative dna-directed rna polymer (Fragment)	Amblyomma cajennense PE	276	30.4382	6.26514	1	2	8	11	0	0	0	0	0	23.55	4	4	0	0	0	0	0	4.35	1	2	0	0	0	0	0	21.74	3	3	1.33333	1.66667	1.25	0.321928	≥ 0.05	P:transcription, DNA-templated; F:DNA-directed RNA polymerase activity; C:nucleus
A0A023FH35	Uncharacterized protein	Amblyomma cajennense PE	277	31.4076	8.29443	1	2	11	24	1.76804	6.86	2	2	1.77045	7.22	2	2	0	0	0	0	0	0	0	0	0	11.91	4	5	1.61333	11.55	4	4	1.33333	3	2.25	1.16993	≥ 0.05	-
A0A023FH40	Putative atp-dependent rna helicase	Amblyomma cajennense PE	278	29.789	5.5542	1	1	5	7	0	0	0	0	0	10.43	2	2	0	0	0	0	0	0	0	0	0	0	0	0	0	20.14	4	5	0.666667	1.66667	2.5	1.32193	≥ 0.05	F:helicase activity; P:metabolic process
A0A023FH48	Putative harbinger (Fragment)	Amblyomma cajennense PE	281	31.732	6.23975	1	3	6	16	0	0	0	0	0	0	0	0	1.63126	9.96	4	4	0	7.47	2	4	0	0	0	0	0	9.61	3	3	1.33333	2.33333	1.75	0.807355	≥ 0.05	-
A0A023FH62	Putative myosin light chain kinase ixodes scapularis myosin light chain kinase (Fragment)	Amblyomma cajennense PE	282	31.6524	9.77393	1	2	4	6	1.66557	4.26	1	1	0	0	0	0	1.74885	22.34	4	5	0	0	0	0	0	0	0	0	0	0	0	0	2	0	0	#NUM!	≥ 0.05	F:kinase activity; P:intracellular signal transduction; P:phosphorylation; C:intracellular
A0A023FH64	Putative fas associated factor family member 2 (Fragment)	Amblyomma cajennense PE	226	26.7247	5.74463	1	1	5	8	0	0	0	0	0	20.35	3	3	0	0	0	0	1.60454	11.95	2	3	0	9.29	2	2	0	0	0	0	1	1.66667	1.66667	0.736966	≥ 0.05	-
A0A023FH67	Putative leucine-rich repeat lrr protein	Amblyomma cajennense PE	227	25.8045	8.44092	1	1	6	10	1.69652	6.17	2	4	0	0	0	0	0	0	0	0	0	14.98	3	3	1.65429	14.54	2	3	0	0	0	0	1.33333	2	1.5	0.584963	≥ 0.05	-
A0A023FH68	Putative microplusin 1 (Fragment)	Amblyomma cajennense PE	74	8.18694	7.34229	1	2	3	10	0	0	0	0	4.0672	22.97	1	2	0	0	0	0	1.62468	39.19	2	2	2.05659	22.97	1	1	4.47937	40.54	3	4	0.666667	2.33333	3.5	1.80735	≥ 0.05	-
A0A023FH73	Putative glucosamine-6-phosphate isomerase	Amblyomma cajennense PE	283	31.872	6.62451	4	1	4	5	0	0	0	0	0	0	0	0	0	0	0	0	1.85759	9.54	2	2	0	0	0	0	2.06578	10.6	2	2	0	1.33333	#DIV/0!	#DIV/0!	≥ 0.05	P:N-acetylglucosamine metabolic process; C:cytoplasm; F:hydrolase activity; P:carbohydrate metabolic process; F:glucosamine-6-phosphate deaminase activity; F:isomerase activity
A0A023FH78	Putative molecular chaperone ixodes scapularis molecular chaperone (Fragment)	Amblyomma cajennense PE	284	31.7598	6.20166	1	0	7	8	0	11.27	2	2	0	0	0	0	0	0	0	0	0	0	0	0	3.95259	23.59	6	6	0	0	0	0	0.666667	2	3	1.58496	≥ 0.05	F:unfolded protein binding; F:metal ion binding; P:protein folding; F:heat shock protein binding
A0A023FH94	Putative glyoxalase	Amblyomma cajennense PE	163	17.8087	9.23193	3	1	9	9	0	17.18	2	2	0	19.02	3	3	0	15.95	2	2	0	0	0	0	0	0	0	0	0	0	0	0	2.33333	0	0	#NUM!	≥ 0.05	-
A0A023FH98	Putative ribosomal protein	Amblyomma cajennense PE	96	11.452	9.71533	1	1	5	5	0	0	0	0	0	0	0	0	0	0	0	0	0	0	0	0	0	29.17	2	2	0	26.04	2	2	0	1.33333	#DIV/0!	#DIV/0!	≥ 0.05	F:structural constituent of ribosome; P:translation; C:ribonucleoprotein complex; C:ribosome; C:intracellular
A0A023FHA7	Putative f0f1-type atp synthase gamma subunit	Amblyomma cajennense PE	293	32.4969	9.01221	3	1	18	27	0	22.18	6	6	1.90979	13.65	3	3	1.62221	34.13	7	7	0	0	0	0	0	21.5	4	4	0	20.48	4	6	5.33333	3.33333	0.625	-0.678072	≥ 0.05	P:ATP synthesis coupled proton transport; C:proton-transporting ATP synthase complex, catalytic core F(1); F:proton-transporting ATPase activity, rotational mechanism; F:proton-transporting ATP synthase activity, rotational mechanism
A0A023FHA9	Putative porcine peroxisomal carbonyl reductase like protein	Amblyomma cajennense PE	294	30.9084	8.70459	2	2	5	8	0	0	0	0	0	10.88	2	2	0	0	0	0	0	14.97	3	3	0	0	0	0	0	0	0	0	0.666667	1	1.5	0.584963	≥ 0.05	P:oxidation-reduction process; F:oxidoreductase activity; P:metabolic process
A0A023FHC7	Putative brca1-associated protein	Amblyomma cajennense PE	115	13.4481	9.23193	1	2	5	12	2.15482	10.43	1	1	0	0	0	0	2.14354	24.35	2	2	2.11584	32.17	3	3	1.92916	10.43	1	1	2.0414	24.35	2	2	1	2	2	1	≥ 0.05	-
A0A023FHC8	Putative anamorsin (Fragment)	Amblyomma cajennense PE	302	32.6806	5.49072	2	3	9	32	0	16.23	2	2	2.10651	15.23	2	3	1.68226	34.77	7	12	0	7.95	2	3	0	17.22	3	4	0	2.65	1	2	5.66667	3	0.529412	-0.917538	≥ 0.05	F:metal ion binding; P:apoptotic process; C:mitochondrion; P:iron-sulfur cluster assembly; C:cytoplasm; F:2 iron, 2 sulfur cluster binding; F:iron-sulfur cluster binding
A0A023FHD0	Putative mitochondrial adp/atp carrier	Amblyomma cajennense PE	303	33.4725	9.89111	1	2	17	40	2.46936	23.1	8	9	8.00249	25.08	6	7	0	0	0	0	2.08344	9.57	3	3	1.8435	11.22	3	3	7.13332	25.08	7	8	5.33333	4.66667	0.875	-0.192645	≥ 0.05	C:integral component of membrane; C:membrane; P:transmembrane transport; C:mitochondrial inner membrane; P:transport; F:transporter activity
A0A023FHE3	Putative glutamyl-trna amidotransferase subunit b (Fragment)	Amblyomma cajennense PE	308	34.3116	8.29443	1	3	10	22	0	0	0	0	0	13.96	3	6	1.71947	21.75	4	5	1.79798	14.29	3	5	1.66437	18.18	4	6	0	0	0	0	3.66667	3.66667	1	0	≥ 0.05	F:ligase activity; F:carbon-nitrogen ligase activity, with glutamine as amido-N-donor; F:transferase activity; P:metabolic process
A0A023FHF2	Putative alanine-glyoxylate aminotransferase agt2 (Fragment)	Amblyomma cajennense PE	309	34.4618	7.76709	1	1	2	2	0	0	0	0	0	0	0	0	0	0	0	0	0	0	0	0	0	0	0	0	0	10.68	2	2	0	0.666667	#DIV/0!	#DIV/0!	≥ 0.05	F:transferase activity; P:metabolic process; F:catalytic activity; F:pyridoxal phosphate binding; F:transaminase activity
A0A023FHF3	Putative glycine-rich secreted protein 95	Amblyomma cajennense PE	121	12.5284	8.57275	1	1	8	12	0	0	0	0	0	0	0	0	0	0	0	0	0	0	0	0	1.85435	32.23	2	3	1.62955	35.54	4	5	0	2.66667	#DIV/0!	#DIV/0!	≥ 0.05	F:metal ion binding; F:nucleic acid binding; F:zinc ion binding
A0A023FHG4	Putative tpa exp: microtubule-binding protein	Amblyomma cajennense PE	173	19.4876	4.71631	5	1	6	10	0	0	0	0	0	26.01	4	5	0	0	0	0	1.68516	6.36	1	1	0	0	0	0	1.6717	13.29	2	2	1.66667	1	0.6	-0.736966	≥ 0.05	-
A0A023FHG8	Putative e3 ubiquitin ligase (Fragment)	Amblyomma cajennense PE	310	35.7692	7.51807	1	1	12	20	0	0	0	0	0	21.61	4	4	0	7.42	2	2	1.85511	20	5	7	0	0	0	0	0	0	0	0	2	2.33333	1.16667	0.222392	≥ 0.05	F:metal ion binding; F:ligase activity; F:ubiquitin-like protein transferase activity; F:zinc ion binding; P:protein ubiquitination; P:regulation of transcription from RNA polymerase II promoter; F:ubiquitin-protein transferase activity; F:transcription coactivator activity
A0A023FHH3	60S ribosomal protein L18a	Amblyomma cajennense PE	176	20.791	10.7847	1	4	12	23	1.68608	8.52	2	3	2.19534	19.89	4	4	1.83097	10.8	2	3	1.75004	27.27	5	6	0	7.39	1	1	0	12.5	3	3	3.33333	3.33333	1	0	≥ 0.05	F:structural constituent of ribosome; P:translation; C:ribonucleoprotein complex; C:ribosome
A0A023FHI1	Putative 60s ribosomal protein l13a (Fragment)	Amblyomma cajennense PE	178	20.5112	10.6235	4	1	6	8	1.70508	4.49	1	1	0	8.43	2	2	0	0	0	0	0	0	0	0	0	0	0	0	0	0	0	0	1	0	0	#NUM!	≥ 0.05	F:structural constituent of ribosome; P:translation; C:large ribosomal subunit; C:ribosome
A0A023FHJ4	Putative arginine methyltransferase-interacting protein (Fragment)	Amblyomma cajennense PE	182	19.1123	4.89404	1	2	8	13	0	0	0	0	0	0	0	0	0	21.43	2	2	1.7994	13.74	2	2	1.75794	31.87	4	5	0	0	0	0	0.666667	2.33333	3.5	1.80735	≥ 0.05	F:metal ion binding; F:nucleic acid binding; F:methyltransferase activity; F:transferase activity; F:zinc ion binding; P:methylation
A0A023FHJ6	Putative ribosomal protein	Amblyomma cajennense PE	127	14.1903	9.53955	2	1	3	3	0	0	0	0	0	0	0	0	0	0	0	0	0	22.83	2	2	0	0	0	0	0	21.26	1	1	0	1	#DIV/0!	#DIV/0!	≥ 0.05	F:structural constituent of ribosome; P:translation; C:ribosome; C:intracellular
A0A023FHK1	Putative ribosomal protein (Fragment)	Amblyomma cajennense PE	181	20.6381	4.97021	1	1	4	4	0	0	0	0	0	0	0	0	0	0	0	0	0	13.81	2	2	0	0	0	0	0	14.92	2	2	0	1.33333	#DIV/0!	#DIV/0!	≥ 0.05	C:ribosome
A0A023FHK3	Putative ca2+/calmodulin-dependent protein phosphat (Fragment)	Amblyomma cajennense PE	182	21.2846	4.89404	4	1	8	11	0	0	0	0	0	0	0	0	0	10.99	2	2	0	37.36	3	3	0	4.4	1	1	0	8.79	2	2	0.666667	2	3	1.58496	≥ 0.05	F:calcium ion binding
A0A023FHM3	Putative ribosomal protein (Fragment)	Amblyomma cajennense PE	187	21.6985	9.70068	1	2	7	9	0	0	0	0	0	0	0	0	0	31.02	5	5	0	0	0	0	0	19.79	3	3	0	0	0	0	1.66667	1	0.6	-0.736966	≥ 0.05	F:structural constituent of ribosome; P:translation; C:ribosome; C:intracellular
A0A023FHM5	Putative ribosomal protein	Amblyomma cajennense PE	135	15.7213	11.0776	1	1	4	5	0	11.85	1	2	0	0	0	0	0	0	0	0	0	0	0	0	0	0	0	0	1.72973	31.11	3	3	0.666667	1	1.5	0.584963	≥ 0.05	F:structural constituent of ribosome; P:translation; C:ribosome; C:intracellular
A0A023FHN8	Uncharacterized protein (Fragment)	Amblyomma cajennense PE	232	25.483	6.63916	1	1	5	8	0	0	0	0	1.76699	3.88	1	1	0	0	0	0	0	9.05	1	2	0	0	0	0	5.19956	17.24	3	5	0.333333	2.33333	7	2.80735	≥ 0.05	-
A0A023FHP4	Putative chd64	Amblyomma cajennense PE	190	20.8523	8.25049	2	1	10	24	1.81382	8.95	2	2	7.72418	26.84	4	4	7.87392	38.95	5	5	2.2095	19.47	3	3	1.96708	13.16	2	2	0	0	0	0	3.66667	1.66667	0.454545	-1.1375	≥ 0.05	-
A0A023FHS1	Putative e3 ubiquitin-protein ligase mycbp2	Amblyomma cajennense PE	193	20.7558	8.5874	1	1	4	11	0	0	0	0	1.63842	15.03	3	3	0	9.33	2	2	0	6.74	1	2	0	6.74	1	2	0	0	0	0	1.66667	1.33333	0.8	-0.321928	≥ 0.05	F:ligase activity; P:metabolic process
A0A023FHT1	Putative thioredoxin peroxidase	Amblyomma cajennense PE	196	21.9941	6.75635	4	1	13	41	11.304	30.61	6	8	8.50681	34.18	6	8	0	22.96	2	3	8.72733	16.84	4	5	6.90705	21.43	4	5	5.77394	40.31	4	5	6.33333	5	0.789474	-0.341037	≥ 0.05	P:oxidation-reduction process; F:oxidoreductase activity; F:antioxidant activity; F:peroxiredoxin activity; F:peroxidase activity
A0A023FHT2	Putative coated pit (Fragment)	Amblyomma cajennense PE	196	21.4101	8.35303	1	2	4	10	0	0	0	0	0	13.78	2	2	0	11.22	2	2	0	0	0	0	0	0	0	0	0	23.98	3	4	1.33333	1.33333	1	0	≥ 0.05	C:membrane; P:endocytosis
A0A023FHU4	Annexin (Fragment)	Amblyomma cajennense PE	197	21.9542	6.78564	1	0	9	29	1.49792	15.74	3	4	8.16778	24.37	6	7	2.25899	20.3	4	4	3.25634	24.37	3	3	3.33639	21.32	4	4	6.93	24.37	3	4	5	3.66667	0.733333	-0.447459	≥ 0.05	F:calcium ion binding; F:calcium-dependent phospholipid binding
A0A023FHV5	Putative vacuolar assembly/sorting protein did2	Amblyomma cajennense PE	200	22.1402	7.95752	3	1	7	9	0	0	0	0	0	13.5	2	2	0	0	0	0	0	0	0	0	1.66132	17.5	3	4	0	0	0	0	0.666667	1.33333	2	1	≥ 0.05	P:vacuolar transport; C:intracellular
A0A023FHW1	Putative bridging integrator 3	Amblyomma cajennense PE	247	28.0614	7.44482	2	1	6	7	0	13.77	2	2	0	5.26	1	1	0	0	0	0	0	0	0	0	0	0	0	0	0	0	0	0	1	0	0	#NUM!	≥ 0.05	-
A0A023FHX2	Putative cytochrome c oxidase subunit va	Amblyomma cajennense PE	154	17.477	5.40186	2	3	7	10	1.7609	18.18	2	2	0	0	0	0	0	14.29	2	2	1.65935	15.58	3	3	0	0	0	0	4.03545	14.29	2	3	1.33333	2	1.5	0.584963	≥ 0.05	P:hydrogen ion transmembrane transport; F:cytochrome-c oxidase activity; C:mitochondrial inner membrane
A0A023FHY2	Putative pre-mrna-splicing factor cwc21 ixodes scapularis pre-mrna-splicing factor cwc21	Amblyomma cajennense PE	204	23.2619	6.7124	1	1	3	4	0	0	0	0	0	0	0	0	0	0	0	0	0	17.16	2	2	0	0	0	0	0	6.86	1	1	0	1	#DIV/0!	#DIV/0!	≥ 0.05	-
A0A023FHY5	Putative alpha-aspartyl dipeptidase ixodes scapularis alpha-aspartyl dipeptidase	Amblyomma cajennense PE	252	27.7469	6.43018	3	1	5	7	0	8.73	1	1	0	0	0	0	0	0	0	0	2.09635	5.95	1	1	0	0	0	0	0	12.3	2	2	0.333333	1	3	1.58496	≥ 0.05	P:intein-mediated protein splicing; P:proteolysis; F:serine-type peptidase activity
A0A023FHZ8	Putative thioredoxin-like protein (Fragment)	Amblyomma cajennense PE	254	27.618	5.8335	2	3	10	17	0	0	0	0	2.07536	14.96	4	4	2.28604	7.87	2	2	3.73089	20.47	6	6	1.82256	2.76	1	1	0	0	0	0	2	2.33333	1.16667	0.222392	≥ 0.05	P:oxidation-reduction process; P:cell redox homeostasis; P:glycerol ether metabolic process; F:protein disulfide oxidoreductase activity; C:cell
A0A023FI01	Putative peptide deformylase (Fragment)	Amblyomma cajennense PE	208	23.8632	8.39697	1	1	5	6	1.78929	17.79	4	4	0	0	0	0	0	0	0	0	0	0	0	0	0	0	0	0	0	7.69	1	1	1.33333	0.333333	0.25	-2	≥ 0.05	F:peptide deformylase activity; P:metabolic process; F:iron ion binding
A0A023FI02	Putative ras protein family member ac	Amblyomma cajennense PE	209	23.6332	7.12256	2	1	8	8	0	0	0	0	0	10.05	1	1	0	0	0	0	0	0	0	0	0	0	0	0	0	34.45	4	4	0.333333	1.33333	4	2	≥ 0.05	F:GTP binding; P:skeletal muscle satellite cell migration; P:small GTPase mediated signal transduction; F:nucleotide binding; C:membrane; P:wound healing, spreading of cells; C:intracellular
A0A023FI16	Putative casein kinase serine/threonine/tyrosine protein kinase (Fragment)	Amblyomma cajennense PE	257	29.9321	9.46631	1	1	9	12	0	17.51	2	2	2.00156	36.96	5	5	0	0	0	0	0	0	0	0	0	0	0	0	0	4.28	1	2	2.33333	0.666667	0.285714	-1.80735	≥ 0.05	F:kinase activity; F:ATP binding; F:protein kinase activity; P:phosphorylation; P:protein phosphorylation
A0A023FI17	Putative inositol phospholipid synthesis protein scs3p (Fragment)	Amblyomma cajennense PE	210	23.7902	8.93896	1	2	4	9	0	0	0	0	0	10.48	1	2	2.0469	23.81	4	5	0	0	0	0	2.09159	16.19	2	2	0	0	0	0	2.33333	0.666667	0.285714	-1.80735	≥ 0.05	-
A0A023FI19	Synaptosomal-associated protein	Amblyomma cajennense PE	210	23.2942	4.86865	1	1	13	24	0	19.52	3	4	0	8.1	1	1	2.11597	44.29	6	7	1.61897	11.43	2	2	1.7829	29.05	4	4	0	18.57	3	3	4	3	0.75	-0.415037	≥ 0.05	C:neuron projection
A0A023FI26	Hipothetical protein (Fragment)	Amblyomma cajennense PE	259	29.9023	9.1001	1	1	6	8	0	3.47	1	1	0	6.18	2	2	0	0	0	0	0	0	0	0	0	0	0	0	0	0	0	0	1	0	0	#NUM!	≥ 0.05	F:nucleic acid binding; F:nucleotide binding
A0A023FI33	Putative ribose-phosphate pyrophosphokinase (Fragment)	Amblyomma cajennense PE	261	28.6328	6.72705	1	5	11	15	0	0	0	0	0	0	0	0	1.70985	18.39	3	4	1.61277	20.69	3	3	1.91238	18.39	3	3	0	0	0	0	1.33333	2	1.5	0.584963	≥ 0.05	F:kinase activity; P:nucleotide biosynthetic process; P:phosphorylation; F:magnesium ion binding; P:cellular biosynthetic process; F:ribose phosphate diphosphokinase activity; P:ribonucleoside monophosphate biosynthetic process
A0A023FI40	Putative translation initiation factor 4f cap-binding subunit eif-4e	Amblyomma cajennense PE	214	24.6152	5.89697	4	1	5	7	0	6.54	1	1	0	6.54	1	1	2.01522	7.01	2	2	0	0	0	0	0	0	0	0	0	0	0	0	1.33333	0	0	#NUM!	≥ 0.05	F:RNA binding; P:translational initiation; P:translation; C:cytoplasm; F:translation initiation factor activity
A0A023FI41	Uncharacterized protein (Fragment)	Amblyomma cajennense PE	262	28.899	8.20654	1	1	6	8	2.04336	16.03	4	5	2.05604	4.2	1	1	0	0	0	0	0	0	0	0	0	0	0	0	0	0	0	0	2	0	0	#NUM!	≥ 0.05	P:oxidation-reduction process; P:cell redox homeostasis; F:electron carrier activity; F:protein disulfide oxidoreductase activity; C:cell
A0A023FI44	Putative proliferation-associated nucleolar protein nol1 (Fragment)	Amblyomma cajennense PE	263	28.9699	8.07471	1	5	9	21	0	0	0	0	0	4.18	1	4	2.22692	19.39	4	6	0	11.79	3	4	0	17.11	2	2	0	4.18	1	1	3.33333	2.33333	0.7	-0.514573	≥ 0.05	F:methyltransferase activity; P:methylation
A0A023FI46	GrpE protein homolog	Amblyomma cajennense PE	216	24.3235	8.25049	1	1	8	13	0	5.56	1	1	0	6.02	1	1	1.77741	13.43	2	2	1.67297	9.26	2	2	3.2722	15.74	3	3	0	5.56	3	3	1.33333	2.66667	2	1	≥ 0.05	P:regulation of catalytic activity; C:mitochondrion; P:protein folding; C:mitochondrial matrix; F:chaperone binding; F:adenyl-nucleotide exchange factor activity; F:protein homodimerization activity
A0A023FI50	Putative glutaredoxin-3 (Fragment)	Amblyomma cajennense PE	217	23.9365	8.90967	1	1	4	7	0	0	0	0	0	0	0	0	0	0	0	0	1.37956	14.29	2	2	0	0	0	0	1.28178	25.81	4	5	0	2.33333	#DIV/0!	#DIV/0!	≥ 0.05	P:oxidation-reduction process; P:cell redox homeostasis; F:electron carrier activity; F:protein disulfide oxidoreductase activity; C:cell
A0A023FI56	Superoxide dismutase	Amblyomma cajennense PE	217	23.9142	7.56201	3	1	9	34	2.13623	11.06	3	3	16.1592	27.19	6	7	7.64367	20.28	4	5	2.05726	9.22	2	2	8.7351	21.66	4	4	6.96082	18.89	3	3	5	3	0.6	-0.736966	≥ 0.05	F:metal ion binding; P:oxidation-reduction process; F:oxidoreductase activity; P:removal of superoxide radicals; P:superoxide metabolic process; F:superoxide dismutase activity
A0A023FI63	Uncharacterized protein (Fragment)	Amblyomma cajennense PE	268	30.6492	8.76318	1	3	8	10	1.77182	14.18	4	4	0	13.43	2	2	0	0	0	0	0	0	0	0	0	0	0	0	0	0	0	0	2	0	0	#NUM!	≥ 0.05	C:cytoplasm; F:protein transporter activity; P:protein import into nucleus; C:nucleus
A0A023FI65	Putative gtpase ran/tc4/gsp1 nuclear protein	Amblyomma cajennense PE	219	24.9777	7.02002	2	0	14	47	9.54319	28.31	5	5	15.0007	25.57	5	5	10.1893	25.11	6	6	13.2347	19.18	4	5	14.2386	32.88	7	7	10.0151	27.4	5	6	5.33333	6	1.125	0.169925	≥ 0.05	F:nucleotide binding; F:GTP binding; P:nucleocytoplasmic transport; P:signal transduction; P:intracellular protein transport; C:intracellular; P:metabolic process; F:GTPase activity; P:small GTPase mediated signal transduction
A0A023FI81	Putative sugar kinase (Fragment)	Amblyomma cajennense PE	273	30.5775	7.66455	1	1	8	10	0	5.86	1	1	0	0	0	0	0	16.48	3	3	0	0	0	0	2.07763	21.61	5	6	0	0	0	0	1.33333	2	1.5	0.584963	≥ 0.05	F:kinase activity; P:phosphorylation; P:carbohydrate metabolic process; F:phosphotransferase activity, alcohol group as acceptor
A0A023FI85	Putative kinesin-like protein (Fragment)	Amblyomma cajennense PE	315	35.1821	7.28369	1	5	7	9	1.62994	5.4	2	2	0	10.16	1	1	2.02233	17.14	4	4	0	10.16	2	2	0	0	0	0	0	0	0	0	2.33333	0.666667	0.285714	-1.80735	≥ 0.05	C:kinesin complex; P:metabolic process; F:microtubule motor activity; P:microtubule-based movement
A0A023FI89	Putative splicing factor 3a subunit 3 (Fragment)	Amblyomma cajennense PE	274	31.2047	7.45947	1	1	6	6	0	0	0	0	0	0	0	0	0	0	0	0	0	12.77	2	2	0	0	0	0	0	0	0	0	0	0.666667	#DIV/0!	#DIV/0!	≥ 0.05	F:nucleic acid binding; F:zinc ion binding; C:nucleus
A0A023FI92	Putative serine/threonine protein phosphatase (Fragment)	Amblyomma cajennense PE	316	35.4037	7.76709	1	3	8	11	0	3.48	1	1	0	0	0	0	0	0	0	0	1.96188	14.24	2	2	0	12.34	3	4	0	0	0	0	0.333333	2	6	2.58496	≥ 0.05	P:protein dephosphorylation; F:catalytic activity; F:protein serine/threonine phosphatase activity
A0A023FIA3	Putative methionyl-trna formyltransferase	Amblyomma cajennense PE	317	35.2553	9.0708	1	3	9	17	0	14.51	3	4	1.80418	12.3	3	3	0	0	0	0	0	5.99	2	2	0	0	0	0	0	0	0	0	2.33333	0.666667	0.285714	-1.80735	≥ 0.05	P:biosynthetic process; F:hydroxymethyl-, formyl- and related transferase activity; F:transferase activity
A0A023FIA7	Putative tpa exp: actin filament-coating protein tropomyosin (Fragment)	Amblyomma cajennense PE	225	26.0512	4.84326	1	1	11	17	0	0	0	0	0	0	0	0	0	0	0	0	0	0	0	0	1.99991	13.78	4	4	9.70513	29.78	6	6	0	3.33333	#DIV/0!	#DIV/0!	≥ 0.05	-
A0A023FIB4	Putative tetratricopeptide repeat protein 1 (Fragment)	Amblyomma cajennense PE	223	25.4311	5.87158	1	1	5	5	0	4.04	1	1	0	0	0	0	0	0	0	0	1.64521	11.21	3	3	0	0	0	0	0	0	0	0	0.333333	1	3	1.58496	≥ 0.05	-
A0A023FIC5	Putative dehydrogenase with different specificities related to short-chain alcohol dehydrogenase	Amblyomma cajennense PE	323	36.2746	8.07471	1	2	4	8	0	0	0	0	0	2.48	1	1	0	4.64	2	2	1.72887	10.84	3	3	0	0	0	0	0	6.5	2	2	1	1.66667	1.66667	0.736966	≥ 0.05	P:oxidation-reduction process; F:oxidoreductase activity; P:metabolic process
A0A023FID1	Putative succinyl-coa synthetase alpha subunit	Amblyomma cajennense PE	325	33.9346	8.96826	5	1	6	6	1.97307	17.23	4	4	0	0	0	0	0	0	0	0	0	0	0	0	0	0	0	0	0	0	0	0	1.33333	0	0	#NUM!	≥ 0.05	F:cofactor binding; F:ligase activity; P:metabolic process; F:catalytic activity
A0A023FID3	Putative serine/threonine protein kinase gpbp (Fragment)	Amblyomma cajennense PE	326	37.8737	5.63037	1	1	4	5	0	18.4	4	5	0	0	0	0	0	0	0	0	0	0	0	0	0	0	0	0	0	0	0	0	1.66667	0	0	#NUM!	≥ 0.05	F:kinase activity; F:lipid binding; P:phosphorylation; P:protein phosphorylation; F:protein serine/threonine kinase activity
A0A023FID4	Putative lysophospholipase (Fragment)	Amblyomma cajennense PE	284	31.394	7.79639	1	1	7	12	0	0	0	0	0	0	0	0	0	10.21	2	2	0	19.37	3	3	0	5.99	1	1	0	7.75	1	1	0.666667	1.66667	2.5	1.32193	≥ 0.05	-
A0A023FIF2	S-adenosylmethionine decarboxylase proenzyme	Amblyomma cajennense PE	335	38.4639	5.21143	2	4	7	17	0	5.97	2	3	1.70586	2.69	1	1	2.25414	6.57	1	1	1.99593	5.97	2	3	0	0	0	0	0	5.67	1	1	1.66667	1.33333	0.8	-0.321928	≥ 0.05	F:adenosylmethionine decarboxylase activity; P:S-adenosylmethioninamine biosynthetic process; P:spermidine biosynthetic process; F:carboxy-lyase activity; F:lyase activity; P:spermine biosynthetic process; P:polyamine biosynthetic process
A0A023FIF8	Protein involved in mrna turnover (Fragment)	Amblyomma cajennense PE	291	33.4541	8.86572	4	1	5	7	0	0	0	0	1.63673	4.12	1	1	0	0	0	0	0	7.9	2	2	1.62218	12.37	2	2	0	5.5	2	2	0.333333	2	6	2.58496	≥ 0.05	C:ribonucleoprotein complex; P:ribosome biogenesis; C:ribosome; C:intracellular
A0A023FIG0	Proteasome subunit beta type	Amblyomma cajennense PE	291	32.0938	7.60596	1	0	9	15	1.6361	13.75	3	3	2.01714	11.34	3	3	0	12.37	3	6	0	0	0	0	0	0	0	0	0	12.71	2	2	4	0.666667	0.166667	-2.58496	≥ 0.05	P:proteolysis involved in cellular protein catabolic process; F:endopeptidase activity; F:hydrolase activity; C:nucleus; C:cytoplasm; F:threonine-type endopeptidase activity; C:proteasome core complex; C:proteasome complex; F:peptidase activity; P:proteolysis
A0A023FIG4	Putative growth hormone-induced protein	Amblyomma cajennense PE	340	35.6874	9.80322	5	1	8	10	0	0	0	0	0	13.53	2	2	1.60979	12.94	4	4	0	0	0	0	0	17.06	3	3	0	7.06	1	1	2	1.33333	0.666667	-0.584963	≥ 0.05	C:integral component of membrane; C:membrane
A0A023FIG7	Putative nadp-dependent isocitrate dehydrogenase (Fragment)	Amblyomma cajennense PE	342	38.6516	7.48877	1	1	13	33	1.37571	11.11	4	4	2.2927	14.62	4	4	2.32856	16.96	6	6	2.18978	12.87	6	7	0	4.09	1	1	2.52334	18.42	6	7	4.66667	5	1.07143	0.0995357	≥ 0.05	F:metal ion binding; P:oxidation-reduction process; P:isocitrate metabolic process; F:oxidoreductase activity; F:magnesium ion binding; F:oxidoreductase activity, acting on the CH-OH group of donors, NAD or NADP as acceptor; F:isocitrate dehydrogenase (NADP+) activity; F:NAD binding
A0A023FIH8	Putative lammer dual specificity kinase (Fragment)	Amblyomma cajennense PE	348	40.6575	7.29834	3	4	10	12	0	0	0	0	0	0	0	0	0	6.32	4	5	0	0	0	0	0	15.8	6	6	0	0	0	0	1.66667	2	1.2	0.263034	≥ 0.05	F:kinase activity; F:ATP binding; F:protein kinase activity; P:phosphorylation; F:nucleotide binding; P:protein phosphorylation
A0A023FIH9	Putative aldehyde dehydrogenase (Fragment)	Amblyomma cajennense PE	299	32.4356	6.78564	1	1	9	13	0	0	0	0	1.67136	3.01	1	1	0	19.4	5	7	0	0	0	0	4.43847	21.07	4	5	0	0	0	0	2.66667	1.66667	0.625	-0.678072	≥ 0.05	P:oxidation-reduction process; F:oxidoreductase activity; F:oxidoreductase activity, acting on the aldehyde or oxo group of donors, NAD or NADP as acceptor; P:metabolic process
A0A023FII0	Putative gmp synthase (Fragment)	Amblyomma cajennense PE	349	38.2425	7.44482	1	2	2	2	0	0	0	0	0	0	0	0	0	0	0	0	0	0	0	0	0	5.16	2	2	0	0	0	0	0	0.666667	#DIV/0!	#DIV/0!	≥ 0.05	F:ATP binding; F:GMP synthase (glutamine-hydrolyzing) activity; F:pyrophosphatase activity; P:GMP biosynthetic process
A0A023FII9	Putative hsc70-interacting protein	Amblyomma cajennense PE	355	40.2731	5.0083	1	1	8	12	0	0	0	0	0	16.06	4	4	0	7.61	3	3	3.36861	6.76	2	4	0	0	0	0	0	0	0	0	2.33333	1.33333	0.571429	-0.807355	≥ 0.05	-
A0A023FIL1	Putative isocitrate dehydrogenase alpha subunit	Amblyomma cajennense PE	370	40.0455	7.91357	1	5	10	17	0	2.97	1	2	0	4.05	1	1	0	0	0	0	0	8.92	3	3	0	20.81	6	7	0	0	0	0	1	3.33333	3.33333	1.73697	≥ 0.05	F:NAD binding; C:mitochondrion; P:tricarboxylic acid cycle; P:oxidation-reduction process; F:isocitrate dehydrogenase (NAD+) activity; F:oxidoreductase activity, acting on the CH-OH group of donors, NAD or NADP as acceptor; F:oxidoreductase activity; F:metal ion binding; F:magnesium ion binding
A0A023FIL3	Putative cyclic nucleotide phosphodiesterase (Fragment)	Amblyomma cajennense PE	374	42.3232	6.20166	3	1	10	14	0	22.99	5	5	2.11225	10.43	3	3	1.74204	4.55	2	2	0	0	0	0	0	0	0	0	0	5.61	3	3	3.33333	1	0.3	-1.73697	≥ 0.05	F:metal ion binding; F:hydrolase activity; P:metabolic process; F:phosphoric diester hydrolase activity; P:signal transduction; F:3',5'-cyclic-nucleotide phosphodiesterase activity
A0A023FIL5	Uncharacterized protein	Amblyomma cajennense PE	166	18.1183	8.71924	2	1	5	9	2.02096	19.88	3	3	0	28.31	3	3	0	9.64	1	1	0	0	0	0	0	0	0	0	0	9.64	1	1	2.33333	0.333333	0.142857	-2.80735	≥ 0.05	-
A0A023FIM2	Putative alpha tubulin (Fragment)	Amblyomma cajennense PE	312	34.3762	5.99854	1	1	16	275	89.2361	54.49	12	37	62.6885	41.35	10	26	97.928	40.38	10	42	98.1199	43.91	10	40	94.5323	43.91	10	37	94.8909	44.23	11	38	35	38.3333	1.09524	0.131245	≥ 0.05	P:microtubule-based process; P:protein polymerization; C:microtubule; F:nucleotide binding; F:GTP binding; C:protein complex; F:structural constituent of cytoskeleton; P:metabolic process; F:GTPase activity
A0A023FIN4	Putative e3 ubiquitin ligase ixodes scapularis e3 ubiquitin ligase (Fragment)	Amblyomma cajennense PE	233	25.7853	6.02393	1	1	5	5	0	0	0	0	0	9.87	1	1	1.83267	8.15	2	2	0	3.86	1	1	0	0	0	0	0	0	0	0	1	0.333333	0.333333	-1.58496	≥ 0.05	F:ligase activity; P:metabolic process
A0A023FIN7	60S ribosomal protein L6 (Fragment)	Amblyomma cajennense PE	234	26.3258	11.1948	2	1	17	52	0	20.09	4	8	2.08628	33.76	7	8	2.41985	21.37	4	8	7.94191	32.48	7	8	1.65409	17.09	5	6	2.31924	11.54	3	5	8	6.33333	0.791667	-0.337035	≥ 0.05	F:structural constituent of ribosome; P:translation; C:ribonucleoprotein complex; C:ribosome; C:intracellular
A0A023FIP1	Putative camp-dependent protein kinase types i and ii regulatory subunit	Amblyomma cajennense PE	383	43.3317	5.46533	5	1	7	12	0	0	0	0	0	12.27	3	4	0	0	0	0	0	0	0	0	0	7.31	3	3	0	0	0	0	1.33333	1	0.75	-0.415037	≥ 0.05	F:kinase activity; P:regulation of protein phosphorylation; P:regulation of protein kinase activity; P:phosphorylation; C:cAMP-dependent protein kinase complex; F:cAMP-dependent protein kinase regulator activity
A0A023FIP7	Putative transcription elongation factor mitochondrial	Amblyomma cajennense PE	316	35.4947	9.24658	1	2	6	10	0	15.82	3	3	0	0	0	0	0	0	0	0	0	14.56	3	3	0	0	0	0	1.79681	19.94	4	4	1	2.33333	2.33333	1.22239	≥ 0.05	P:translational elongation; F:translation elongation factor activity
A0A023FIQ0	Putative mitochondrial adp/atp carrier	Amblyomma cajennense PE	316	34.7132	9.94971	4	1	24	74	9.25188	23.73	9	12	14.4166	19.94	6	9	1.7913	28.16	9	11	3.474	21.52	9	9	1.8435	21.84	7	9	7.07192	23.1	7	8	10.6667	8.66667	0.8125	-0.29956	≥ 0.05	C:integral component of membrane; C:membrane; P:transmembrane transport; C:mitochondrial inner membrane; P:transport; F:transporter activity
A0A023FIQ1	Putative rte all	Amblyomma cajennense PE	388	43.7127	9.0415	1	3	15	21	5.57055	8.76	3	4	0	9.79	4	4	1.67366	10.05	4	4	0	0	0	0	2.12614	9.28	2	2	2.10973	15.46	4	4	4	2	0.5	-1	≥ 0.05	-
A0A023FIR2	Putative alpha crystallins	Amblyomma cajennense PE	178	20.2461	6.78564	1	1	2	2	0	0	0	0	0	0	0	0	0	28.09	2	2	0	0	0	0	0	0	0	0	0	0	0	0	0.666667	0	0	#NUM!	≥ 0.05	-
A0A023FIS4	Putative aaa+-type atpase (Fragment)	Amblyomma cajennense PE	396	44.0158	9.61279	1	3	16	27	0	11.87	4	5	0	11.36	3	3	0	10.61	4	4	2.02896	11.36	4	4	0	4.29	1	1	0	0	0	0	4	1.66667	0.416667	-1.26303	≥ 0.05	F:ATP binding; F:nucleotide binding
A0A023FIS6	Putative transcription initiation factor (Fragment)	Amblyomma cajennense PE	320	34.9216	5.07178	1	1	6	10	1.68284	3.13	2	2	1.87554	5.63	2	2	1.72058	8.44	2	2	0	0	0	0	0	0	0	0	2.14353	9.69	3	3	2	1	0.5	-1	≥ 0.05	P:transcription initiation from RNA polymerase II promoter; P:translational initiation; F:translation initiation factor activity; P:positive regulation of transcription elongation from RNA polymerase II promoter; C:nucleus; F:DNA binding
A0A023FIT7	Putative atp-dependent zinc metalloprotease yme1	Amblyomma cajennense PE	399	44.187	9.24658	1	1	4	7	0	0	0	0	0	0	0	0	0	0	0	0	1.64118	4.76	1	1	2.07949	14.29	4	5	1.85644	4.76	1	1	0	2.33333	#DIV/0!	#DIV/0!	≥ 0.05	P:proteolysis; F:ATP binding; F:metallopeptidase activity; F:peptidase activity
A0A023FIU0	Putative mitochondrial ribosomal protein l24	Amblyomma cajennense PE	247	28.987	9.30518	3	5	12	17	0	9.72	2	2	3.3235	11.74	2	2	0	9.72	2	2	0	18.62	3	3	0	0	0	0	1.79676	28.34	6	6	2	3	1.5	0.584963	≥ 0.05	F:structural constituent of ribosome; P:translation; C:ribosome; C:intracellular
A0A023FIU8	Putative phosphorylase kinase (Fragment)	Amblyomma cajennense PE	249	28.2062	7.88428	1	3	9	21	0	8.43	1	1	2.04283	24.9	4	9	0	0	0	0	0	0	0	0	0	0	0	0	0	26.1	3	3	3.33333	1	0.3	-1.73697	≥ 0.05	F:kinase activity; P:phosphorylation; P:glycogen metabolic process; F:calmodulin binding
A0A023FIW0	Putative mrna capping enzyme guanylyltransferase alpha subunit (Fragment)	Amblyomma cajennense PE	252	28.6482	7.13721	1	1	4	4	0	0	0	0	1.77717	10.32	2	2	0	0	0	0	1.60794	4.37	1	1	0	0	0	0	0	5.16	1	1	0.666667	0.666667	1	0	≥ 0.05	F:transferase activity; F:protein tyrosine phosphatase activity; P:dephosphorylation; F:phosphatase activity; F:protein tyrosine/serine/threonine phosphatase activity; F:hydrolase activity; P:peptidyl-tyrosine dephosphorylation; P:protein dephosphorylation; F:nucleotidyltransferase activity
A0A023FIW3	Putative transglutaminase/protease-like proteinues (Fragment)	Amblyomma cajennense PE	332	36.8382	6.60986	1	3	7	7	0	0	0	0	0	0	0	0	0	0	0	0	0	5.42	1	1	0	20.48	4	4	2.20931	12.65	2	2	0	2.33333	#DIV/0!	#DIV/0!	≥ 0.05	P:proteolysis; P:peptide cross-linking; F:peptidase activity
A0A023FIW7	Serine/threonine-protein phosphatase	Amblyomma cajennense PE	333	37.6359	6.41748	4	1	14	24	3.88619	12.91	3	6	7.16215	12.91	4	5	0	15.02	3	3	3.72828	18.92	5	5	0	0	0	0	5.69813	8.11	2	2	4.66667	2.33333	0.5	-1	≥ 0.05	F:hydrolase activity; P:metabolic process; P:protein dephosphorylation; F:phosphoprotein phosphatase activity
A0A023FIX5	Uncharacterized protein (Fragment)	Amblyomma cajennense PE	254	27.7708	5.37646	1	1	2	2	0	0	0	0	0	0	0	0	0	0	0	0	0	0	0	0	0	10.63	2	2	0	0	0	0	0	0.666667	#DIV/0!	#DIV/0!	≥ 0.05	-
A0A023FIX7	Putative glycogen synthase kinase-3	Amblyomma cajennense PE	409	45.4997	8.68994	6	1	6	8	6.20341	7.33	3	4	2.12851	14.91	4	4	0	0	0	0	0	0	0	0	0	0	0	0	0	0	0	0	2.66667	0	0	#NUM!	≥ 0.05	F:kinase activity; F:ATP binding; F:protein kinase activity; P:phosphorylation; F:nucleotide binding; P:protein phosphorylation
A0A023FIX8	Putative snrna-activating protein complex subunit 3 (Fragment)	Amblyomma cajennense PE	336	38.9341	6.16357	1	2	11	13	0	6.55	2	2	0	0	0	0	1.62926	7.44	2	3	0	16.07	5	5	0	0	0	0	0	0	0	0	1.66667	1.66667	1	0	≥ 0.05	-
A0A023FIY0	Putative e3 ubiquitin protein (Fragment)	Amblyomma cajennense PE	411	46.6348	6.07471	1	2	18	42	2.0719	12.65	3	3	0	13.14	4	4	0	13.38	7	7	0	14.6	6	7	0	12.41	5	7	0	11.19	4	7	4.66667	7	1.5	0.584963	≥ 0.05	-
A0A023FIY8	Putative 60s ribosomal protein l9	Amblyomma cajennense PE	189	21.6627	10.1401	3	1	11	27	0	21.16	3	3	3.65495	23.28	3	3	4.75284	20.63	3	4	2.33787	10.58	2	2	0	14.81	3	3	2.8483	28.57	4	4	3.33333	3	0.9	-0.152003	≥ 0.05	F:structural constituent of ribosome; P:translation; C:ribosome; F:rRNA binding; C:intracellular
A0A023FIZ8	Putative 26s proteasome regulatory complex atpase rpt5 (Fragment)	Amblyomma cajennense PE	339	37.5377	5.10986	1	1	24	42	4.47322	25.07	6	6	2.34295	11.21	4	5	2.31363	23.3	6	6	2.06359	16.52	5	6	1.7356	21.24	6	6	4.25683	11.21	4	5	5.66667	5.66667	1	0	≥ 0.05	F:ATP binding; C:proteasome complex; F:nucleotide binding
A0A023FJ00	Putative negative elongation factor b negative elongation factor b (Fragment)	Amblyomma cajennense PE	231	26.2828	8.41162	1	1	4	7	0	3.46	1	2	0	0	0	0	1.60686	8.66	2	2	0	5.63	1	1	0	0	0	0	0	5.19	1	1	1.33333	0.666667	0.5	-1	≥ 0.05	P:translational elongation; F:translation elongation factor activity; P:negative regulation of transcription, DNA-templated; C:nucleus
A0A023FJ01	Putative branched chain aminotransferase bcat1 pyridoxal phosphate enzyme type iv superfamily (Fragment)	Amblyomma cajennense PE	340	38.5213	9.0708	1	2	7	10	5.61411	10	4	5	0	0	0	0	0	0	0	0	0	4.71	2	2	0	0	0	0	2.11507	8.53	3	3	1.66667	1.66667	1	0	≥ 0.05	P:branched-chain amino acid metabolic process; F:branched-chain-amino-acid transaminase activity; F:transferase activity; P:metabolic process; F:catalytic activity; F:transaminase activity
A0A023FJ18	Putative actin regulatory gelsolin/villin family (Fragment)	Amblyomma cajennense PE	421	47.9828	5.66846	1	1	8	8	0	7.6	2	2	0	8.55	2	2	0	0	0	0	0	3.56	1	1	0	0	0	0	0	0	0	0	1.33333	0.333333	0.25	-2	≥ 0.05	P:actin nucleation; F:calcium ion binding; P:barbed-end actin filament capping; F:actin binding; P:actin filament severing
A0A023FJ33	Putative mitochondrial ribosomal protein s31 (Fragment)	Amblyomma cajennense PE	346	38.856	5.59229	1	2	9	19	0	7.51	3	3	3.83379	14.16	5	7	0	4.91	2	4	0	0	0	0	0	0	0	0	0	7.8	2	2	4.66667	0.666667	0.142857	-2.80735	≥ 0.05	F:structural constituent of ribosome; C:mitochondrial small ribosomal subunit; C:ribosome
A0A023FJ55	Hipothetical protein	Amblyomma cajennense PE	266	30.16	9.26123	1	1	13	20	0	24.44	4	5	2.70339	10.53	2	2	0	19.92	5	5	0	0	0	0	2.24616	12.78	2	3	0	9.4	2	2	4	1.66667	0.416667	-1.26303	≥ 0.05	P:rRNA processing; F:rRNA (adenine-N6,N6-)-dimethyltransferase activity; P:rRNA modification; P:methylation; P:rRNA methylation; F:rRNA methyltransferase activity
A0A023FJ62	Putative trypsin (Fragment)	Amblyomma cajennense PE	355	38.6585	7.38623	1	1	4	10	1.66759	4.23	1	3	0	12.96	2	2	1.83262	8.45	2	3	0	0	0	0	0	0	0	0	0	5.92	1	1	2.66667	0.333333	0.125	-3	≥ 0.05	P:proteolysis; F:serine-type endopeptidase activity; F:serine-type peptidase activity; F:hydrolase activity; F:peptidase activity
A0A023FJ70	Putative chaperonin complex component tcp-1 eta subunit (Fragment)	Amblyomma cajennense PE	356	38.7521	5.64307	1	0	15	33	5.75102	15.73	4	5	2.83817	28.09	5	5	4.81114	14.89	4	5	2.18376	12.64	3	4	3.91532	16.57	4	5	5.13484	22.19	5	6	5	5	1	0	≥ 0.05	F:unfolded protein binding; F:ATP binding; P:protein folding; F:nucleotide binding
A0A023FJ72	Putative elongation factor 1 beta/delta chain ixodes scapularis elongation factor 1 beta/delta chain	Amblyomma cajennense PE	245	27.4658	5.04639	1	1	7	10	0	0	0	0	1.62704	20.82	4	4	0	0	0	0	0	8.16	1	1	2.21848	11.43	2	2	0	0	0	0	1.33333	1	0.75	-0.415037	≥ 0.05	P:translational elongation; F:translation elongation factor activity; P:translation; C:eukaryotic translation elongation factor 1 complex
A0A023FJ75	Proteasome subunit alpha type	Amblyomma cajennense PE	246	27.1068	7.40088	5	1	9	23	4.37934	7.72	2	2	8.30545	17.48	4	5	2.43795	8.13	2	2	1.7551	6.1	2	2	3.64112	17.07	3	3	2.65901	9.76	2	2	3	2.33333	0.777778	-0.36257	≥ 0.05	P:proteolysis involved in cellular protein catabolic process; C:proteasome core complex, alpha-subunit complex; F:endopeptidase activity; F:hydrolase activity; C:nucleus; C:cytoplasm; F:threonine-type endopeptidase activity; C:proteasome core complex; C:proteasome complex; P:ubiquitin-dependent protein catabolic process; F:peptidase activity; P:proteolysis
A0A023FJ86	Putative sulfotransferase ixodes scapularis sulfotransferase (Fragment)	Amblyomma cajennense PE	248	28.1971	5.80811	1	8	13	26	1.67054	21.77	5	6	2.02328	15.73	3	3	1.68457	16.13	3	4	0	11.69	4	4	1.84092	3.63	1	1	0	14.11	3	3	4.33333	2.66667	0.615385	-0.70044	≥ 0.05	F:transferase activity; P:metabolic process; F:sulfotransferase activity
A0A023FJ97	Putative deoxyribonuclease ii (Fragment)	Amblyomma cajennense PE	363	41.6043	9.67139	3	1	7	11	0	0	0	0	0	0	0	0	0	7.99	3	3	0	11.85	3	3	0	8.82	3	3	0	0	0	0	1	2	2	1	≥ 0.05	P:DNA metabolic process; F:deoxyribonuclease II activity
A0A023FJ98	Putative mitochondrial/ ribosomal protein (Fragment)	Amblyomma cajennense PE	275	31.7433	9.29053	1	1	4	6	0	0	0	0	0	0	0	0	0	0	0	0	1.80053	11.64	2	2	0	0	0	0	0	0	0	0	0	0.666667	#DIV/0!	#DIV/0!	≥ 0.05	F:structural constituent of ribosome; P:translation; C:large ribosomal subunit; C:ribosome
A0A023FJ99	Uncharacterized protein	Amblyomma cajennense PE	205	24.3288	4.86865	3	2	4	7	0	0	0	0	0	0	0	0	0	0	0	0	0	0	0	0	1.64183	18.54	3	3	0	9.27	1	2	0	1.66667	#DIV/0!	#DIV/0!	≥ 0.05	F:calcium ion binding
A0A023FJA4	Putative sok1 kinase belonging to the ste20/sps1/gc kinase family (Fragment)	Amblyomma cajennense PE	252	28.6195	5.16064	1	1	6	16	2.00961	10.32	2	2	0	14.29	3	5	0	10.71	2	5	0	0	0	0	0	5.16	1	2	0	0	0	0	4	0.666667	0.166667	-2.58496	≥ 0.05	F:kinase activity; P:phosphorylation
A0A023FJB8	Putative u3 small nucleolar ribonucleoprotein snornp subunit (Fragment)	Amblyomma cajennense PE	369	41.9703	5.41455	1	2	12	19	1.81792	6.23	3	3	1.97919	2.71	1	1	0	12.74	3	3	0	5.15	2	2	3.85408	17.89	4	5	0	0	0	0	2.33333	2.33333	1	0	≥ 0.05	C:viral nucleocapsid; P:rRNA processing; C:Mpp10 complex; C:ribonucleoprotein complex; C:small nucleolar ribonucleoprotein complex; C:nucleus
A0A023FJB9	Uncharacterized protein	Amblyomma cajennense PE	209	24.1637	9.33447	2	6	13	40	3.35626	29.19	6	7	0	12.92	2	5	0	0	0	0	1.66758	19.62	3	6	0	23.44	5	6	1.64384	20.1	4	7	4	6.33333	1.58333	0.662965	≥ 0.05	-
A0A023FJC0	Putative fibrillarin (Fragment)	Amblyomma cajennense PE	254	27.8197	9.02686	1	1	17	33	4.20216	20.47	5	5	2.00809	11.42	3	4	7.03296	17.72	4	4	6.28769	15.75	4	4	1.88806	8.27	3	3	1.67562	19.29	5	5	4.33333	4	0.923077	-0.115477	≥ 0.05	F:RNA binding; F:methyltransferase activity; P:rRNA processing; P:tRNA processing; P:methylation
A0A023FJC4	Putative spermine/spermidine synthase (Fragment)	Amblyomma cajennense PE	281	31.3553	6.39209	1	2	8	19	0	0	0	0	0	15.3	3	4	0	0	0	0	0	0	0	0	1.84425	8.19	2	2	0	16.01	3	4	1.33333	2	1.5	0.584963	≥ 0.05	-
A0A023FJC8	Putative sulfotransferase (Fragment)	Amblyomma cajennense PE	281	32.4837	9.29053	1	2	10	19	0	11.74	3	3	0	14.95	4	4	0	15.3	3	3	0	0	0	0	2.0611	11.03	3	3	2.02296	9.25	2	2	3.33333	1.66667	0.5	-1	≥ 0.05	F:transferase activity; P:metabolic process; F:sulfotransferase activity
A0A023FJD6	Putative rna methylase	Amblyomma cajennense PE	211	23.5458	6.43018	1	2	4	11	2.28671	11.85	1	1	0	0	0	0	0	11.85	1	1	0	11.85	1	1	2.36775	9	1	1	2.16399	13.74	2	2	0.666667	1.33333	2	1	≥ 0.05	F:nucleic acid binding; F:methyltransferase activity; P:methylation
A0A023FJE2	Putative krotzkopf verkehrt (Fragment)	Amblyomma cajennense PE	375	43.4466	6.32861	1	1	3	4	0	2.4	1	1	0	0	0	0	0	0	0	0	0	8.27	3	3	0	0	0	0	0	0	0	0	0.333333	1	3	1.58496	≥ 0.05	P:metabolic process; F:transferase activity, transferring hexosyl groups
A0A023FJE3	Uncharacterized protein	Amblyomma cajennense PE	284	30.5535	9.93506	1	1	2	2	1.70761	12.32	2	2	0	0	0	0	0	0	0	0	0	0	0	0	0	0	0	0	0	0	0	0	0.666667	0	0	#NUM!	≥ 0.05	-
A0A023FJE5	Putative conserved plasma membrane protein (Fragment)	Amblyomma cajennense PE	259	28.8877	8.67529	1	3	14	35	4.57284	24.71	4	8	0	11.97	3	3	5.09134	15.83	3	8	2.12111	12.74	3	3	2.28895	16.22	4	5	4.36132	8.88	2	3	6.33333	3.66667	0.578947	-0.788496	≥ 0.05	-
A0A023FJF5	Uncharacterized protein (Fragment)	Amblyomma cajennense PE	286	30.7006	4.38623	1	2	6	9	1.7605	4.2	1	1	1.79134	6.29	4	4	0	8.04	1	1	0	0	0	0	0	0	0	0	0	9.09	2	2	2	0.666667	0.333333	-1.58496	≥ 0.05	-
A0A023FJG7	Putative leucine-rich acidic nuclear protein	Amblyomma cajennense PE	262	29.8268	4.10693	6	1	7	43	9.06746	17.94	4	5	18.3179	25.95	6	9	6.62407	11.83	3	6	5.01405	20.61	5	6	6.31833	22.14	5	6	9.21808	14.89	3	4	6.66667	5.33333	0.8	-0.321928	≥ 0.05	-
A0A023FJG9	Putative nucleosome assembly protein nap-1 (Fragment)	Amblyomma cajennense PE	383	43.5073	4.76709	2	1	11	30	2.53909	16.19	6	10	0	4.44	2	2	0	9.14	5	5	2.14596	7.57	4	4	2.0097	3.92	2	3	2.42527	2.09	1	1	5.66667	2.66667	0.470588	-1.08746	≥ 0.05	P:nucleosome assembly; C:nucleus
A0A023FJH0	Putative ribosomal l1 domain-containing protein (Fragment)	Amblyomma cajennense PE	290	32.5643	9.11475	1	2	6	6	1.8563	12.76	3	3	0	0	0	0	0	0	0	0	0	9.31	2	2	0	0	0	0	0	0	0	0	1	0.666667	0.666667	-0.584963	≥ 0.05	F:RNA binding
A0A023FJH1	Uncharacterized protein (Fragment)	Amblyomma cajennense PE	263	28.0743	4.50049	1	1	3	3	0	0	0	0	1.68159	9.89	2	2	0	0	0	0	0	0	0	0	0	0	0	0	0	0	0	0	0.666667	0	0	#NUM!	≥ 0.05	-
A0A023FJI4	Putative troponin t skeletal muscle	Amblyomma cajennense PE	391	46.7623	4.84326	3	1	17	29	1.94735	9.21	4	4	1.61442	14.07	5	5	1.74597	4.6	2	2	1.89248	9.97	4	6	3.78177	11.51	4	6	2.08244	2.05	1	1	3.66667	4.33333	1.18182	0.241008	≥ 0.05	C:troponin complex; P:regulation of muscle contraction
A0A023FJI5	Putative lim domain binding protein ldb1/nli/clim (Fragment)	Amblyomma cajennense PE	294	34.032	8.41162	1	1	9	36	0	16.33	4	5	0	0	0	0	0	11.9	2	7	0	23.13	5	6	1.67953	19.39	6	8	0	12.24	3	4	4	6	1.5	0.584963	≥ 0.05	F:LIM domain binding; P:regulation of nucleic acid-templated transcription; C:nucleus; F:transcription cofactor activity
A0A023FJI8	Putative nadh:ubiquinone oxidoreductase ndufa9/39kda subunit (Fragment)	Amblyomma cajennense PE	393	44.7631	9.23193	1	1	14	20	0	14.76	4	4	0	16.28	3	3	1.42777	9.92	3	3	1.48213	17.56	6	6	1.85706	4.83	2	2	0	0	0	0	3.33333	2.66667	0.8	-0.321928	≥ 0.05	P:metabolic process; F:catalytic activity; F:coenzyme binding
A0A023FJJ2	Putative e3 ubiquitin ligase ixodes scapularis e3 ubiquitin ligase (Fragment)	Amblyomma cajennense PE	267	30.4826	8.6167	1	1	11	22	0	6.37	2	4	1.75446	16.1	3	4	0	0	0	0	1.64802	14.23	4	4	0	0	0	0	3.34285	25.84	6	7	2.66667	3.66667	1.375	0.459432	≥ 0.05	F:ligase activity; P:metabolic process
A0A023FJJ4	Putative t-complex protein 1 (Fragment)	Amblyomma cajennense PE	297	31.3813	7.12256	1	2	12	20	0	18.18	4	4	0	0	0	0	4.12243	26.6	6	6	0	24.92	6	6	0	0	0	0	0	14.48	2	2	3.33333	2.66667	0.8	-0.321928	≥ 0.05	F:unfolded protein binding; F:ATP binding; P:protein folding; F:nucleotide binding
A0A023FJJ8	Putative secreted protein (Fragment)	Amblyomma cajennense PE	269	29.4702	5.37646	6	4	11	17	0	4.83	1	1	0	16.73	2	2	0	22.68	3	3	1.66526	3.72	1	1	1.85138	30.11	5	5	0	30.48	5	5	2	3.66667	1.83333	0.874469	≥ 0.05	-
A0A023FJK1	Putative transcription termination factor (Fragment)	Amblyomma cajennense PE	270	30.815	8.99756	1	6	14	44	0	31.11	8	12	1.62622	13.33	3	6	0	28.89	5	6	0	14.07	4	6	1.77648	16.67	4	5	0	19.26	4	6	8	5.66667	0.708333	-0.4975	≥ 0.05	P:regulation of transcription, DNA-templated; C:mitochondrion; F:double-stranded DNA binding
A0A023FJK3	Putative 60s ribosomal protein l5	Amblyomma cajennense PE	298	34.3108	9.62744	1	1	6	8	0	14.43	3	3	0	0	0	0	0	0	0	0	0	0	0	0	0	0	0	0	0	0	0	0	1	0	0	#NUM!	≥ 0.05	F:structural constituent of ribosome; F:5S rRNA binding; P:translation; C:ribosome; C:intracellular
A0A023FJK8	Putative phosphorylcholine transferase/cholinephosphate cytidylyltransferase (Fragment)	Amblyomma cajennense PE	273	31.8471	7.21045	1	2	14	22	0	0	0	0	0	0	0	0	3.00092	27.84	6	7	0	8.42	2	2	0	26.37	5	6	1.92825	12.82	3	3	2.33333	3.66667	1.57143	0.652077	≥ 0.05	P:biosynthetic process; F:nucleotidyltransferase activity; F:transferase activity; F:catalytic activity
A0A023FJK9	Putative mekk (Fragment)	Amblyomma cajennense PE	299	33.0985	6.78564	1	3	7	8	1.60016	5.69	2	2	0	0	0	0	0	0	0	0	0	0	0	0	0	0	0	0	0	27.09	4	5	0.666667	1.66667	2.5	1.32193	≥ 0.05	F:ATP binding; F:protein kinase activity; F:nucleotide binding; P:protein phosphorylation
A0A023FJL0	Putative ribosomal protein	Amblyomma cajennense PE	220	25.3415	9.89111	1	1	10	24	0	14.55	3	3	0	14.55	3	5	0	12.27	2	3	0	10.91	2	2	0	15	3	3	1.67463	20	4	4	3.66667	3	0.818182	-0.289507	≥ 0.05	F:structural constituent of ribosome; P:translation; C:large ribosomal subunit; C:ribonucleoprotein complex; C:ribosome
A0A023FJL8	Putative rna-binding nuclear protein mak16 (Fragment)	Amblyomma cajennense PE	275	32.5713	5.09717	4	3	10	19	0	0	0	0	2.06157	15.64	4	5	0	0	0	0	1.38575	33.09	7	8	2.4365	12	3	3	0	0	0	0	1.66667	3.66667	2.2	1.1375	≥ 0.05	-
A0A023FJM1	Putative dehydrogenase	Amblyomma cajennense PE	275	29.7211	6.43018	1	1	6	9	0	4	1	1	0	0	0	0	0	8.73	2	2	0	0	0	0	0	0	0	0	0	11.27	3	3	1	1	1	0	≥ 0.05	P:oxidation-reduction process; F:oxidoreductase activity; P:metabolic process; P:tetrahydrobiopterin biosynthetic process; F:sepiapterin reductase activity
A0A023FJM9	Adenosylhomocysteinase	Amblyomma cajennense PE	405	44.8248	6.82959	1	2	13	19	2.27703	6.67	2	2	2.30486	4.94	2	2	1.79069	7.41	2	2	4.05089	12.1	3	3	3.78518	12.84	5	5	0	0	0	0	2	2.66667	1.33333	0.415037	≥ 0.05	F:adenosylhomocysteinase activity; F:hydrolase activity; P:one-carbon metabolic process
A0A023FJN3	Putative dehydrogenase kinase	Amblyomma cajennense PE	406	45.9521	8.36768	4	1	7	23	0	5.17	3	3	0	0	0	0	0	0	0	0	2.05022	14.78	4	7	0	0	0	0	3.40329	10.84	4	9	1	5.33333	5.33333	2.41504	≥ 0.05	F:kinase activity; P:phosphorylation
A0A023FJP7	Putative tigger transposase (Fragment)	Amblyomma cajennense PE	430	47.4938	6.94678	1	3	10	15	0	4.42	2	3	0	10.93	3	3	0	0	0	0	0	12.56	3	3	0	4.88	1	1	2.19674	4.42	1	2	2	2	1	0	≥ 0.05	F:nucleic acid binding; F:DNA binding
A0A023FJQ7	Putative cytochrome c1 (Fragment)	Amblyomma cajennense PE	306	34.188	7.50342	1	2	10	28	1.93112	3.27	1	1	2.98732	8.17	3	4	1.9768	6.21	2	2	4.1298	18.3	5	8	2.42918	10.46	3	3	4.26025	16.67	4	4	2.33333	5	2.14286	1.09954	≥ 0.05	F:heme binding; F:electron carrier activity
A0A023FJR0	Putative rna-binding protein elav/hu rrm superfamily (Fragment)	Amblyomma cajennense PE	413	43.7348	8.74854	3	1	7	7	0	0	0	0	0	5.57	2	2	0	7.02	2	2	0	6.3	2	2	0	0	0	0	0	0	0	0	1.33333	0.666667	0.5	-1	≥ 0.05	F:RNA binding; F:nucleic acid binding; F:nucleotide binding
A0A023FJR6	Putative cullin-associated and neddylation-dissociated 1	Amblyomma cajennense PE	284	31.2872	6.62451	1	1	8	12	0	0	0	0	0	16.55	4	5	0	0	0	0	0	0	0	0	0	0	0	0	0	0	0	0	1.66667	0	0	#NUM!	≥ 0.05	-
A0A023FJR7	Putative n-acetylneuraminate pyruvate lyase	Amblyomma cajennense PE	308	33.7686	6.72705	2	3	11	27	1.60406	18.51	3	4	3.46372	14.61	3	4	1.94268	17.86	4	5	1.84702	15.26	3	4	0	0	0	0	2.40838	12.66	3	3	4.33333	2.33333	0.538462	-0.893085	≥ 0.05	P:metabolic process; F:catalytic activity; F:lyase activity
A0A023FJR8	Putative u5 snrnp-like rna helicase subunit	Amblyomma cajennense PE	416	50.045	9.979	1	1	16	58	0	5.77	2	3	6.11831	16.11	6	22	0	0	0	0	1.6091	12.02	7	8	1.95706	8.41	3	6	6.47825	14.42	6	8	8.33333	7.33333	0.88	-0.184425	≥ 0.05	F:helicase activity; P:metabolic process
A0A023FJS3	Putative ribosomal protein (Fragment)	Amblyomma cajennense PE	441	49.0602	11.0483	1	1	22	42	3.7664	23.58	10	10	3.67216	14.06	6	7	3.89982	12.47	5	5	0	9.98	4	5	0	15.65	6	7	0	0	0	0	7.33333	4	0.545455	-0.874469	≥ 0.05	F:structural constituent of ribosome; P:translation; C:ribosome
A0A023FJT0	Putative nucleoporin like 1 (Fragment)	Amblyomma cajennense PE	310	33.4404	8.86572	1	4	11	16	0	0	0	0	1.83282	9.03	2	2	3.50589	5.48	2	2	0	20.32	6	6	0	0	0	0	0	2.9	1	1	1.33333	2.33333	1.75	0.807355	≥ 0.05	C:nuclear pore; P:nucleocytoplasmic transport
A0A023FJT6	Putative fumarylacetoacetase (Fragment)	Amblyomma cajennense PE	419	46.4281	6.80029	1	1	8	16	2.13836	9.07	3	4	1.98998	5.73	2	2	2.21844	11.22	3	3	1.92306	8.35	3	3	0	0	0	0	0	0	0	0	3	1	0.333333	-1.58496	≥ 0.05	F:fumarylacetoacetase activity; P:metabolic process; F:catalytic activity; P:aromatic amino acid family metabolic process
A0A023FJT9	Putative ribosomal protein	Amblyomma cajennense PE	420	47.9245	7.98682	1	2	13	27	1.85282	10.24	3	5	1.72149	13.57	4	4	0	9.76	3	4	1.6798	12.62	5	5	3.61783	6.67	3	4	2.05915	6.9	2	2	4.33333	3.66667	0.846154	-0.241008	≥ 0.05	F:structural constituent of ribosome; C:mitochondrion; P:translation; C:ribosome
A0A023FJU1	Putative atpase	Amblyomma cajennense PE	452	51.2475	7.94287	1	2	11	16	0	18.36	5	5	0	0	0	0	0	0	0	0	0	0	0	0	0	12.39	3	4	0	0	0	0	1.66667	1.33333	0.8	-0.321928	≥ 0.05	F:ATP binding
A0A023FJU6	Uncharacterized protein (Fragment)	Amblyomma cajennense PE	423	47.2377	6.34131	2	3	12	16	0	0	0	0	0	9.69	3	3	1.61546	10.87	4	5	0	0	0	0	0	13.48	3	3	0	10.4	3	3	2.66667	2	0.75	-0.415037	≥ 0.05	P:oxidation-reduction process; F:oxidoreductase activity, acting on CH-OH group of donors; F:flavin adenine dinucleotide binding
A0A023FJV5	Putative nadp-dependent isocitrate dehydrogenase (Fragment)	Amblyomma cajennense PE	461	52.6436	8.44092	2	2	28	74	8.33626	29.5	14	16	12.3284	19.74	9	9	10.8576	28.85	11	11	4.26674	9.33	4	4	2.44491	12.36	4	4	13.3088	26.46	11	11	12	6.33333	0.527778	-0.921997	≥ 0.05	F:metal ion binding; P:oxidation-reduction process; P:isocitrate metabolic process; F:oxidoreductase activity; F:magnesium ion binding; F:oxidoreductase activity, acting on the CH-OH group of donors, NAD or NADP as acceptor; F:isocitrate dehydrogenase (NADP+) activity; F:NAD binding
A0A023FJV9	Putative wing disc dorsal/ventral pattern formation	Amblyomma cajennense PE	298	31.5736	8.83643	1	1	10	13	0	0	0	0	0	0	0	0	1.369	18.79	5	5	0	0	0	0	0	0	0	0	1.68885	13.42	4	4	1.66667	1.33333	0.8	-0.321928	≥ 0.05	-
A0A023FJW6	Uncharacterized protein (Fragment)	Amblyomma cajennense PE	471	52.4994	4.88135	1	1	10	12	0	9.34	3	3	0	8.28	4	4	1.62952	3.4	1	1	0	5.73	2	2	0	3.18	2	2	0	0	0	0	2.66667	1.33333	0.5	-1	≥ 0.05	F:ATP binding; F:protein kinase activity; P:protein phosphorylation
A0A023FJY1	Putative m13 family peptidase (Fragment)	Amblyomma cajennense PE	491	56.8584	5.89697	1	2	10	13	0	0	0	0	0	0	0	0	1.99318	4.68	3	3	2.06855	12.42	4	4	2.16731	8.35	3	3	2.00639	5.09	3	3	1	3.33333	3.33333	1.73697	≥ 0.05	P:proteolysis; F:metallopeptidase activity; F:metalloendopeptidase activity
A0A023FJY3	Putative mrna cleavage and polyadenylation factor i/ii complex subunit pcf11 (Fragment)	Amblyomma cajennense PE	494	53.7749	4.64014	1	2	3	4	0	0	0	0	1.7351	2.02	1	1	0	0	0	0	0	0	0	0	0	7.09	2	2	0	0	0	0	0.333333	0.666667	2	1	≥ 0.05	-
A0A023FJY6	Putative loc443621 protein strongylocentrotus purpuratus (Fragment)	Amblyomma cajennense PE	503	56.4728	5.96045	1	8	17	54	0	8.55	3	5	0	11.73	6	10	0	6.96	4	8	0	10.14	4	9	0	5.77	3	8	0	0	0	0	7.66667	5.66667	0.73913	-0.436099	≥ 0.05	-
A0A023FJY9	Putative dihydrolipoamide transacylase alpha-keto acid dehydrogenase e2 subunit	Amblyomma cajennense PE	509	55.7772	8.29443	1	5	9	11	3.70755	13.16	6	6	0	0	0	0	0	0	0	0	0	0	0	0	0	0	0	0	0	0	0	0	2	0	0	#NUM!	≥ 0.05	F:transferase activity; P:metabolic process; F:transferase activity, transferring acyl groups
A0A023FJZ0	Putative ribosome bioproteinsis protein rpf1 (Fragment)	Amblyomma cajennense PE	309	36.8202	9.89111	3	2	15	25	1.78448	17.48	7	7	0	0	0	0	0	0	0	0	0	15.53	5	5	0	10.03	3	3	1.68183	9.71	4	5	2.33333	4.33333	1.85714	0.893085	≥ 0.05	-
A0A023FJZ6	Putative vacuolar h+-atpase v1 sector subunit a	Amblyomma cajennense PE	522	58.4335	6.23975	3	2	14	20	0	0	0	0	0	6.9	3	4	0	0	0	0	2.21731	9	5	5	1.6879	3.45	2	2	0	5.94	3	3	1.33333	3.33333	2.5	1.32193	≥ 0.05	P:ion transport; P:transport; F:proton-transporting ATPase activity, rotational mechanism; F:ATP binding; P:proton transport; P:ATP hydrolysis coupled proton transport; F:hydrolase activity, acting on acid anhydrides, catalyzing transmembrane movement of substances; C:proton-transporting two-sector ATPase complex, catalytic domain; C:proton-transporting V-type ATPase, V1 domain
A0A023FJZ7	Putative alanine aminotransferase	Amblyomma cajennense PE	524	57.7936	8.60205	1	3	11	14	0	0	0	0	0	0	0	0	0	10.11	2	3	2.039	9.73	3	3	0	4.58	2	2	0	10.11	3	3	1	2.66667	2.66667	1.41504	≥ 0.05	P:biosynthetic process; F:transferase activity; F:catalytic activity; F:pyridoxal phosphate binding; F:transaminase activity
A0A023FJZ8	Putative death-associated protein (Fragment)	Amblyomma cajennense PE	530	57.744	7.40088	1	1	7	11	0	4.91	2	2	0	2.08	1	2	0	7.55	3	3	0	0	0	0	0	0	0	0	0	0	0	0	2.33333	0	0	#NUM!	≥ 0.05	-
A0A023FK03	Putative pyridoxal-dependent decarboxylase (Fragment)	Amblyomma cajennense PE	544	59.6336	4.88135	1	1	4	4	0	4.04	1	1	0	0	0	0	0	9.56	3	3	0	0	0	0	0	0	0	0	0	0	0	0	1.33333	0	0	#NUM!	≥ 0.05	P:metabolic process; F:catalytic activity
A0A023FK06	Putative heat shock protein (Fragment)	Amblyomma cajennense PE	551	61.9972	6.30322	1	1	12	20	2.08617	8.17	4	4	0	0	0	0	2.20095	7.08	3	3	4.54297	2.9	1	2	3.86698	5.44	2	2	3.62779	6.9	3	3	2.33333	2.33333	1	0	≥ 0.05	F:unfolded protein binding; F:ATP binding; P:response to stress; P:protein folding
A0A023FK07	Uncharacterized protein (Fragment)	Amblyomma cajennense PE	555	61.406	7.97217	1	3	13	17	0	0	0	0	0	12.07	6	6	0	0	0	0	1.78546	2.88	1	1	1.60958	1.44	1	1	2.10113	6.31	2	2	2	1.33333	0.666667	-0.584963	≥ 0.05	F:urocanate hydratase activity; P:metabolic process
A0A023FK14	Putative nadp/fad dependent oxidoreductase (Fragment)	Amblyomma cajennense PE	427	48.0999	5.08447	1	1	9	11	0	0	0	0	0	4.92	1	1	0	0	0	0	0	0	0	0	0	0	0	0	0	5.39	2	2	0.333333	0.666667	2	1	≥ 0.05	P:oxidation-reduction process; F:oxidoreductase activity; F:iron ion binding; F:FMN binding
A0A023FK15	Putative 26s proteasome regulatory complex subunit rpn11	Amblyomma cajennense PE	311	34.5826	6.12549	2	3	6	12	0	0	0	0	1.80623	4.18	1	1	2.29968	21.54	4	5	0	18.33	3	3	0	4.18	1	1	2.11462	10.93	2	2	2	2	1	0	≥ 0.05	C:proteasome complex
A0A023FK17	Putative translocase of outer mitochondrial membrane complex subunit	Amblyomma cajennense PE	563	63.2452	6.7417	1	1	12	20	0	0	0	0	0	11.01	5	5	1.73009	3.91	2	4	0	3.02	1	1	0	0	0	0	0	4.97	3	3	3	1.33333	0.444444	-1.16993	≥ 0.05	-
A0A023FK26	Putative actin regulatory gelsolin/villin family (Fragment)	Amblyomma cajennense PE	570	64.6683	5.96045	1	3	12	16	0	0	0	0	0	4.39	2	2	0	0	0	0	1.6633	5.79	2	2	1.73759	4.74	3	3	0	7.19	4	4	0.666667	3	4.5	2.16993	≥ 0.05	F:actin binding; P:cytoskeleton organization
A0A023FK27	Uncharacterized protein	Amblyomma cajennense PE	430	47.508	7.6499	2	1	10	11	1.77431	8.14	2	3	0	0	0	0	0	15.12	3	3	0	0	0	0	0	7.91	3	3	0	0	0	0	2	1	0.5	-1	≥ 0.05	P:oxidation-reduction process; F:oxidoreductase activity
A0A023FK37	Putative insulin-degrading enzyme (Fragment)	Amblyomma cajennense PE	577	66.2958	6.93213	1	1	13	18	0	5.37	2	2	1.75978	9.01	4	4	0	8.49	3	3	0	6.41	3	3	0	0	0	0	0	8.67	3	3	3	2	0.666667	-0.584963	≥ 0.05	F:metal ion binding; P:metabolic process; F:catalytic activity
A0A023FK38	Putative tumor suppressor protein (Fragment)	Amblyomma cajennense PE	435	48.5589	7.54736	1	1	5	6	2.07728	6.44	2	2	0	3.91	1	1	0	0	0	0	0	3.45	1	1	2.15561	4.83	2	2	0	0	0	0	1	1	1	0	≥ 0.05	P:signal transduction
A0A023FK44	Putative gdp-l-fucose synthetase (Fragment)	Amblyomma cajennense PE	318	35.8885	7.37158	1	1	7	11	0	11.01	2	2	2.33426	19.81	4	4	1.71537	15.72	3	3	0	0	0	0	0	0	0	0	1.87243	11.32	2	2	3	0.666667	0.222222	-2.16993	≥ 0.05	F:catalytic activity; P:'de novo' GDP-L-fucose biosynthetic process; F:coenzyme binding; F:GDP-L-fucose synthase activity
A0A023FK50	Putative programmed cell death protein (Fragment)	Amblyomma cajennense PE	320	35.2578	5.36377	1	1	4	4	0	0	0	0	0	0	0	0	0	0	0	0	0	20	4	4	0	0	0	0	0	0	0	0	0	1.33333	#DIV/0!	#DIV/0!	≥ 0.05	C:cytoplasm
A0A023FK53	Putative transcription factor ap-1 ixodes scapularis transcription factor ap-1	Amblyomma cajennense PE	242	26.8558	8.73389	2	4	7	13	0	13.22	2	2	0	21.07	3	3	0	0	0	0	0	12.81	2	2	0	11.16	2	2	0	8.26	1	1	1.66667	1.66667	1	0	≥ 0.05	P:regulation of transcription, DNA-templated; F:sequence-specific DNA binding; F:transcription factor activity, sequence-specific DNA binding; F:DNA binding
A0A023FK54	Putative sulfide:quinone oxidoreductase/flavo-binding protein	Amblyomma cajennense PE	441	48.6281	9.42236	1	5	12	16	0	0	0	0	0	0	0	0	3.55183	10.43	4	5	0	11.34	4	4	1.75197	11.11	3	3	1.91543	1.81	1	2	1.66667	3	1.8	0.847997	≥ 0.05	P:oxidation-reduction process; F:oxidoreductase activity
A0A023FK56	Putative angiotensin i-converting enzyme (Fragment)	Amblyomma cajennense PE	596	68.6062	6.15088	1	1	12	16	0	0	0	0	0	9.06	3	3	0	11.24	5	5	0	0	0	0	0	3.19	2	2	0	3.36	1	1	2.66667	1	0.375	-1.41504	≥ 0.05	F:metal ion binding; F:peptidyl-dipeptidase activity; P:proteolysis; F:metallopeptidase activity; F:carboxypeptidase activity; F:hydrolase activity; C:membrane; F:peptidase activity
A0A023FK60	Uncharacterized protein (Fragment)	Amblyomma cajennense PE	605	69.862	6.18896	1	1	11	13	0	0	0	0	1.72601	7.93	3	4	0	16.03	5	5	0	0	0	0	0	0	0	0	0	0	0	0	3	0	0	#NUM!	≥ 0.05	-
A0A023FK75	Putative sequestosome 1 (Fragment)	Amblyomma cajennense PE	326	35.4591	6.84424	1	8	14	20	0	2.15	1	1	0	13.8	4	5	0	11.66	3	4	0	4.91	1	2	0	0	0	0	3.44149	25.46	6	7	3.33333	3	0.9	-0.152003	≥ 0.05	F:zinc ion binding
A0A023FK77	Putative sorting and assembly machinery component 50	Amblyomma cajennense PE	452	50.2755	7.59131	4	9	11	18	0	0	0	0	0	0	0	0	0	24.56	6	8	0	0	0	0	0	0	0	0	0	0	0	0	2.66667	0	0	#NUM!	≥ 0.05	C:outer membrane
A0A023FK82	Uncharacterized protein (Fragment)	Amblyomma cajennense PE	326	36.4465	5.66846	1	2	10	20	0	0	0	0	0	0	0	0	0	20.25	5	9	0	18.4	5	5	0	0	0	0	0	10.74	3	3	3	2.66667	0.888889	-0.169925	≥ 0.05	P:protein folding
A0A023FK89	Putative splicing factor 3b subunit 2 (Fragment)	Amblyomma cajennense PE	633	70.9786	5.40186	2	2	7	8	0	0	0	0	0	0	0	0	2.05805	4.11	3	3	0	0	0	0	0	0	0	0	0	9	4	4	1	1.33333	1.33333	0.415037	≥ 0.05	C:nucleus
A0A023FK93	Putative rhophilin	Amblyomma cajennense PE	655	74.2219	7.79639	5	1	19	29	3.58428	10.84	7	7	2.07944	4.89	2	2	0	10.23	4	5	1.68736	4.89	2	4	0	5.34	2	2	0	0	0	0	4.66667	2	0.428571	-1.22239	≥ 0.05	P:signal transduction
A0A023FKA5	Putative metalloendopeptidase	Amblyomma cajennense PE	252	28.5818	7.32764	1	4	9	13	3.69209	10.71	3	4	1.32688	16.27	3	3	0	0	0	0	0	0	0	0	0	0	0	0	3.10202	11.51	3	3	2.33333	1	0.428571	-1.22239	≥ 0.05	P:proteolysis; F:metalloendopeptidase activity
A0A023FKA7	Uncharacterized protein (Fragment)	Amblyomma cajennense PE	335	37.0969	6.32861	1	1	6	7	0	0	0	0	0	0	0	0	0	0	0	0	1.6156	19.1	5	6	0	0	0	0	0	0	0	0	0	2	#DIV/0!	#DIV/0!	≥ 0.05	P:oxidation-reduction process; F:oxidoreductase activity, acting on CH-OH group of donors; F:flavin adenine dinucleotide binding
A0A023FKB0	Putative molecular chaperone dnak	Amblyomma cajennense PE	685	74.4672	6.0874	1	4	28	41	2.29076	14.16	8	8	1.62466	12.7	6	6	1.72714	9.49	6	6	1.62133	9.78	5	5	3.33733	5.69	3	3	1.70155	10.36	6	6	6.66667	4.66667	0.7	-0.514573	≥ 0.05	F:unfolded protein binding; F:ATP binding; P:protein folding; F:nucleotide binding
A0A023FKB2	Putative gtp-binding protein drg2 odn superfamily (Fragment)	Amblyomma cajennense PE	336	38.0601	8.38232	1	1	10	13	0	0	0	0	0	25	6	6	0	5.36	2	2	0	0	0	0	0	0	0	0	0	14.88	3	3	2.66667	1	0.375	-1.41504	≥ 0.05	F:GTP binding; F:nucleotide binding
A0A023FKB3	Putative nuclear migration protein nudc (Fragment)	Amblyomma cajennense PE	254	29.2712	7.73779	1	2	14	24	0	23.62	5	5	0	23.62	5	7	0	0	0	0	2.15412	20.08	4	5	2.02864	14.96	2	2	2.30155	17.72	4	5	4	4	1	0	≥ 0.05	-
A0A023FKB7	Uncharacterized protein	Amblyomma cajennense PE	254	28.8425	7.45947	2	1	2	2	0	0	0	0	0	0	0	0	0	0	0	0	2.10023	7.87	2	2	0	0	0	0	0	0	0	0	0	0.666667	#DIV/0!	#DIV/0!	≥ 0.05	-
A0A023FKB9	Putative alkaline phosphatase ec (Fragment)	Amblyomma cajennense PE	470	51.8146	6.75635	2	3	10	21	0	0	0	0	2.87466	9.15	4	4	0	0	0	0	1.23363	5.74	3	4	0	0	0	0	0	0	0	0	1.33333	1.33333	1	0	≥ 0.05	F:phosphatase activity; P:metabolic process; P:protein dephosphorylation; F:catalytic activity
A0A023FKC2	Putative lipid exporter abca1 (Fragment)	Amblyomma cajennense PE	709	77.7335	6.7124	1	3	10	17	0	7.05	2	2	1.21857	5.08	3	3	0	0	0	0	0	1.97	1	1	1.88248	5.78	4	4	1.2776	4.8	3	4	1.66667	3	1.8	0.847997	≥ 0.05	F:ATPase activity; F:ATP binding; C:integral component of membrane; P:metabolic process; F:nucleotide binding; P:transport; F:transporter activity
A0A023FKC3	Uncharacterized protein (Fragment)	Amblyomma cajennense PE	338	37.7312	5.13525	1	1	3	6	0	0	0	0	0	0	0	0	0	2.96	1	2	0	7.4	3	4	0	0	0	0	0	0	0	0	0.666667	1.33333	2	1	≥ 0.05	-
A0A023FKD1	Uncharacterized protein (Fragment)	Amblyomma cajennense PE	475	53.7882	8.03076	1	5	22	45	1.28469	17.05	6	6	0	10.95	3	3	0	0	0	0	1.28845	20	8	9	3.37377	13.26	7	10	0	9.26	5	6	3	8.33333	2.77778	1.47393	≥ 0.05	P:metabolic process; F:catalytic activity
A0A023FKE2	Putative heat shock protein (Fragment)	Amblyomma cajennense PE	480	54.5164	6.354	1	0	11	15	2.08617	15.63	5	5	0	0	0	0	0	0	0	0	0	0	0	0	1.72027	2.92	1	1	3.62779	7.92	3	3	1.66667	1.33333	0.8	-0.321928	≥ 0.05	F:unfolded protein binding; F:ATP binding; P:response to stress; P:protein folding
A0A023FKF1	Putative low-density lipoprotein receptor pediculus us corporis low-density lipoprotein receptor	Amblyomma cajennense PE	770	83.8281	6.78564	1	8	23	64	3.57627	13.64	6	11	7.38183	14.03	7	11	1.88287	7.92	3	6	1.68531	6.1	5	7	1.6724	7.79	5	7	7.00255	9.22	6	9	9.33333	7.66667	0.821429	-0.283793	≥ 0.05	C:integral component of membrane; C:membrane
A0A023FKF2	Putative mitochondrial translation elongation factor tu (Fragment)	Amblyomma cajennense PE	260	29.0903	8.66064	1	3	18	26	0	0	0	0	0	20.77	4	4	0	0	0	0	1.84593	21.15	5	5	1.686	17.69	4	4	4.20608	32.31	6	6	1.33333	5	3.75	1.90689	≥ 0.05	P:translational elongation; F:GTP binding; F:translation elongation factor activity
A0A023FKF7	Putative aconitase/aconitase aconitase superfamily	Amblyomma cajennense PE	782	85.1286	8.104	2	2	24	44	0	9.34	5	6	0	0	0	0	6.75433	13.3	7	9	11.8657	11	7	7	13.9148	16.37	8	8	5.37486	8.31	5	5	5	6.66667	1.33333	0.415037	≥ 0.05	P:metabolic process; P:tricarboxylic acid cycle; F:aconitate hydratase activity; F:4 iron, 4 sulfur cluster binding
A0A023FKF8	Putative 39s ribosomal protein	Amblyomma cajennense PE	261	30.6929	9.43701	2	4	14	28	4.05482	13.79	3	3	1.71773	12.64	3	5	0	12.64	3	3	0	14.56	3	4	0	17.24	4	5	0	0	0	0	3.66667	3	0.818182	-0.289507	≥ 0.05	F:structural constituent of ribosome; P:translation; C:mitochondrial ribosome; C:ribosome
A0A023FKF9	Putative fructose-16-bisphosphatase (Fragment)	Amblyomma cajennense PE	315	34.0204	7.95752	1	1	4	5	0	15.24	3	3	0	4.76	1	1	0	0	0	0	0	0	0	0	0	4.76	1	1	0	0	0	0	1.33333	0.333333	0.25	-2	≥ 0.05	F:hydrolase activity; P:protein dephosphorylation; P:carbohydrate metabolic process; F:phosphoric ester hydrolase activity; F:fructose 1,6-bisphosphate 1-phosphatase activity
A0A023FKG4	Putative sulfotransferase ixodes scapularis sulfotransferase	Amblyomma cajennense PE	315	36.6204	7.10791	1	1	9	17	0	0	0	0	1.64375	8.25	2	4	0	19.05	4	4	0	16.83	5	5	0	0	0	0	0	0	0	0	2.66667	1.66667	0.625	-0.678072	≥ 0.05	F:transferase activity; P:metabolic process; F:sulfotransferase activity
A0A023FKG5	Putative atp-dependent rna helicase	Amblyomma cajennense PE	494	54.821	5.79541	1	2	22	68	1.72043	13.97	6	8	0	20.04	7	10	1.83479	18.02	6	10	1.76717	9.51	5	8	3.39304	8.1	4	7	1.87172	20.45	8	11	9.33333	8.66667	0.928571	-0.106915	≥ 0.05	F:helicase activity; F:nucleic acid binding; F:ATP binding; F:hydrolase activity; P:metabolic process
A0A023FKG6	Putative molecular chaperone ixodes scapularis molecular chaperone (Fragment)	Amblyomma cajennense PE	347	39.1147	7.81104	1	0	8	9	2.58043	16.14	4	4	0	0	0	0	0	0	0	0	0	0	0	0	3.95259	15.85	5	5	0	0	0	0	1.33333	1.66667	1.25	0.321928	≥ 0.05	F:unfolded protein binding; F:metal ion binding; F:ATP binding; P:protein folding; P:response to heat; F:heat shock protein binding
A0A023FKI0	Putative u5 snrnp-specific protein-like factor	Amblyomma cajennense PE	350	39.1337	8.29443	1	2	7	9	0	0	0	0	1.71522	7.43	2	2	0	0	0	0	0	0	0	0	0	0	0	0	1.8299	23.14	6	7	0.666667	2.33333	3.5	1.80735	≥ 0.05	-
A0A023FKI2	Putative sulfotransferase ixodes scapularis sulfotransferase (Fragment)	Amblyomma cajennense PE	264	30.0272	5.51611	2	1	4	4	0	11.36	2	2	0	0	0	0	0	6.06	2	2	0	0	0	0	0	0	0	0	0	0	0	0	1.33333	0	0	#NUM!	≥ 0.05	F:transferase activity; P:metabolic process; F:sulfotransferase activity
A0A023FKJ4	Elongation factor Ts, mitochondrial	Amblyomma cajennense PE	353	39.3066	5.18604	1	1	19	26	0	0	0	0	3.77593	12.46	4	4	0	23.23	6	6	0	7.93	2	2	0	9.92	4	4	3.71283	17	6	7	3.33333	4.33333	1.3	0.378512	≥ 0.05	P:translational elongation; C:mitochondrion; F:translation elongation factor activity; P:translation; C:intracellular
A0A023FKJ9	Putative signal recognition particle receptor alpha subunit	Amblyomma cajennense PE	355	39.7283	8.23584	1	1	5	6	0	0	0	0	0	0	0	0	0	0	0	0	0	9.01	2	2	0	0	0	0	0	0	0	0	0	0.666667	#DIV/0!	#DIV/0!	≥ 0.05	F:GTP binding; F:signal recognition particle binding; F:GTPase activity; C:signal recognition particle receptor complex; P:metabolic process; P:intracellular protein transport; P:transport
A0A023FKK2	Putative 2-oxoglutarate dehydrogenase e1 subunit (Fragment)	Amblyomma cajennense PE	522	59.8299	6.771	1	1	6	7	0	0	0	0	0	0	0	0	0	4.98	1	1	0	0	0	0	1.8741	1.92	1	1	3.45286	6.13	4	4	0.333333	1.66667	5	2.32193	≥ 0.05	F:oxidoreductase activity, acting on the aldehyde or oxo group of donors, disulfide as acceptor; P:oxidation-reduction process; F:thiamine pyrophosphate binding; P:metabolic process; P:tricarboxylic acid cycle; F:oxoglutarate dehydrogenase (succinyl-transferring) activity
A0A023FKK3	Putative glycinamide ribonucleotide synthetase gars/aminoimidazole ribonucleotide synthetase airs	Amblyomma cajennense PE	994	107.038	6.58057	1	3	19	26	0	8.55	5	6	0	11.37	7	7	0	0	0	0	0	0	0	0	0	5.33	4	4	0	0	0	0	4.33333	1.33333	0.307692	-1.70044	≥ 0.05	P:'de novo' IMP biosynthetic process; P:biosynthetic process; F:phosphoribosylglycinamide formyltransferase activity; F:phosphoribosylformylglycinamidine cyclo-ligase activity; C:cytoplasm; F:phosphoribosylamine-glycine ligase activity; F:ATP binding; F:catalytic activity; F:metal ion binding; F:hydroxymethyl-, formyl- and related transferase activity; P:purine nucleobase biosynthetic process
A0A023FKK8	Putative p-type atpase (Fragment)	Amblyomma cajennense PE	1072	120.361	7.35693	1	9	36	87	14.8064	13.99	10	16	7.19447	9.51	8	9	6.87832	12.78	9	17	4.4468	9.98	10	11	0	9.05	6	7	3.81222	10.63	9	11	14	9.66667	0.690476	-0.534336	≥ 0.05	F:phospholipid-translocating ATPase activity; C:integral component of membrane; C:membrane; F:hydrolase activity; P:phospholipid translocation; F:nucleotide binding; F:ATP binding; P:phospholipid transport; F:metal ion binding; P:metabolic process; C:trans-Golgi network; F:magnesium ion binding
A0A023FKL0	Uncharacterized protein (Fragment)	Amblyomma cajennense PE	322	35.9988	4.89404	1	1	6	6	0	0	0	0	0	6.21	2	2	0	4.97	1	1	0	10.56	2	2	0	0	0	0	0	0	0	0	1	0.666667	0.666667	-0.584963	≥ 0.05	F:zinc ion binding
A0A023FKL3	Putative transcription elongation factor spt6 (Fragment)	Amblyomma cajennense PE	1106	125.492	6.41748	1	6	33	87	4.87158	9.49	13	15	1.63464	8.5	10	12	1.70248	5.88	6	8	0	8.95	9	11	1.7209	9.4	10	14	1.62726	5.88	7	9	11.6667	11.3333	0.971429	-0.0418202	≥ 0.05	P:translational elongation; P:nucleobase-containing compound metabolic process; F:nucleic acid binding; F:translation elongation factor activity; P:regulation of transcription from RNA polymerase II promoter; P:regulation of DNA-templated transcription, elongation
A0A023FKL4	Putative udp-glucose pyrophosphorylase (Fragment)	Amblyomma cajennense PE	358	39.8307	7.95752	1	2	8	20	0	0	0	0	0	18.16	4	4	0	14.53	3	4	0	12.01	2	2	0	0	0	0	0	10.06	2	4	2.66667	2	0.75	-0.415037	≥ 0.05	F:UTP:glucose-1-phosphate uridylyltransferase activity; P:metabolic process; F:uridylyltransferase activity; P:UDP-glucose metabolic process
A0A023FKM2	Putative cdc2-related protein kinase (Fragment)	Amblyomma cajennense PE	362	40.7346	6.46826	1	1	10	28	0	12.71	5	6	1.91852	6.35	3	5	0	8.01	4	4	0	0	0	0	0	6.35	2	4	1.73337	14.36	5	6	5	3.33333	0.666667	-0.584963	≥ 0.05	F:kinase activity; F:ATP binding; F:protein kinase activity; P:phosphorylation; F:nucleotide binding; P:protein phosphorylation; F:protein serine/threonine kinase activity
A0A023FKM5	T-complex protein 1 subunit delta	Amblyomma cajennense PE	536	57.4895	7.51807	1	1	16	24	2.39747	7.84	4	4	0	0	0	0	2.582	14.55	7	7	2.33679	5.97	3	3	1.68412	7.09	3	3	2.62685	7.09	4	4	3.66667	3.33333	0.909091	-0.137504	≥ 0.05	F:unfolded protein binding; F:ATP binding; C:cytoplasm; P:protein folding; F:nucleotide binding
A0A023FKN3	Uncharacterized protein (Fragment)	Amblyomma cajennense PE	274	27.8708	4.34814	1	1	3	3	0	0	0	0	0	0	0	0	0	8.03	2	2	0	0	0	0	2.50236	5.11	1	1	0	0	0	0	0.666667	0.333333	0.5	-1	≥ 0.05	-
A0A023FKN4	Putative leucine-rich repeat flightless-interacting protein 2	Amblyomma cajennense PE	363	42.1436	6.11279	2	4	15	15	0	0	0	0	0	0	0	0	1.63323	18.73	6	6	0	8.82	3	3	0	0	0	0	0	0	0	0	2	1	0.5	-1	≥ 0.05	-
A0A023FKN5	Putative neurofilament heavy polypeptide (Fragment)	Amblyomma cajennense PE	545	58.6896	9.08545	3	7	26	43	1.96126	4.59	2	3	5.77243	11.74	5	6	0	17.8	8	8	0	0	0	0	0	14.68	7	8	2.17304	4.22	2	2	5.66667	3.33333	0.588235	-0.765535	≥ 0.05	-
A0A023FKN6	Putative ubiquitin carboxyl-terminal hydrolase bap1 (Fragment)	Amblyomma cajennense PE	329	36.7367	6.53662	1	2	5	9	1.85899	4.56	1	2	0	0	0	0	0	15.81	3	3	1.67002	4.56	1	1	0	8.21	2	3	0	0	0	0	1.66667	1.33333	0.8	-0.321928	≥ 0.05	P:proteolysis; F:hydrolase activity; F:cysteine-type peptidase activity; F:peptidase activity; F:ubiquitin-specific protease activity; P:ubiquitin-dependent protein catabolic process; C:intracellular
A0A023FKN8	Fructose-bisphosphate aldolase	Amblyomma cajennense PE	364	39.7063	8.04541	2	2	10	31	10.0327	19.51	5	6	6.06018	4.95	2	3	5.75179	9.62	3	3	2.3662	9.62	4	4	6.32189	6.87	3	3	9.76744	10.71	4	5	4	4	1	0	≥ 0.05	F:fructose-bisphosphate aldolase activity; F:catalytic activity; P:glycolytic process; F:lyase activity
A0A023FKP0	Putative pogo family transposase ixodes scapularis pogo family transposase	Amblyomma cajennense PE	331	36.5744	7.03467	1	2	5	9	0	0	0	0	0	3.93	1	1	0	10.57	2	3	0	0	0	0	0	13.29	3	3	0	0	0	0	1.33333	1	0.75	-0.415037	≥ 0.05	F:nucleic acid binding; F:DNA binding
A0A023FKP1	Putative 20-hydroxysteroid dehydrogenase ixodes scapularis 20-hydroxysteroid dehydrogenase	Amblyomma cajennense PE	276	30.4625	6.55127	3	5	12	38	7.88719	18.84	4	5	2.26765	11.23	3	6	3.78299	28.26	6	7	0	12.68	3	3	2.01679	15.58	3	5	0	25.72	5	5	6	4.33333	0.722222	-0.469485	≥ 0.05	P:oxidation-reduction process; F:oxidoreductase activity; P:metabolic process
A0A023FKP3	Uncharacterized protein (Fragment)	Amblyomma cajennense PE	333	37.1669	5.78271	1	1	5	13	0	12.01	3	3	0	6.61	1	1	0	0	0	0	0	9.91	2	2	2.02174	12.31	3	3	0	6.61	1	1	1.33333	2	1.5	0.584963	≥ 0.05	-
A0A023FKP8	Putative gtp-binding protein drg1 odn superfamily	Amblyomma cajennense PE	367	40.881	8.95361	2	2	10	23	0	0	0	0	1.61585	13.62	5	5	1.84964	3.81	1	1	3.555	8.17	2	3	1.65843	12.26	3	3	3.79055	7.63	2	3	2	3	1.5	0.584963	≥ 0.05	F:GTP binding; F:nucleotide binding
A0A023FKQ2	Putative sh3 domain protein sh3glb	Amblyomma cajennense PE	368	41.1546	5.68115	1	1	9	13	0	0	0	0	3.51682	9.51	5	5	1.60181	2.72	1	1	1.93187	13.04	4	4	0	0	0	0	1.64631	9.24	3	3	2	2.33333	1.16667	0.222392	≥ 0.05	C:cytoplasm
A0A023FKR0	ATP synthase subunit alpha	Amblyomma cajennense PE	555	59.9296	8.77783	2	2	24	96	31.8575	22.16	11	14	17.4514	25.95	10	15	17.9503	12.97	7	9	24.6532	24.86	11	13	23.0401	21.26	9	12	24.3441	23.96	11	13	12.6667	12.6667	1	0	≥ 0.05	P:ATP synthesis coupled proton transport; C:proton-transporting ATP synthase complex, catalytic core F(1); P:ion transport; P:transport; F:proton-transporting ATP synthase activity, rotational mechanism; P:ATP metabolic process; F:nucleotide binding; F:proton-transporting ATPase activity, rotational mechanism; F:ATP binding; P:ATP biosynthetic process; P:proton transport; C:proton-transporting tw…
A0A023FKR6	Putative ras related/rac-gtp binding protein (Fragment)	Amblyomma cajennense PE	372	40.5179	7.44482	1	1	7	7	0	0	0	0	0	15.32	4	4	0	4.84	1	1	1.67429	7.53	2	2	0	0	0	0	0	0	0	0	1.66667	0.666667	0.4	-1.32193	≥ 0.05	F:GTP binding; P:mitochondrion transport along microtubule; F:GTPase activity; F:calcium ion binding; P:small GTPase mediated signal transduction; P:metabolic process; C:integral component of mitochondrial outer membrane
A0A023FKR9	Putative g protein beta-subunit 76c	Amblyomma cajennense PE	338	37.4457	6.78564	3	2	10	15	0	3.25	1	1	0	10.95	4	5	0	12.43	3	3	0	0	0	0	0	13.02	3	3	0	10.06	3	3	3	2	0.666667	-0.584963	≥ 0.05	-
A0A023FKS1	60S ribosomal protein L6	Amblyomma cajennense PE	282	32.129	11.0483	5	1	20	61	0	16.67	4	8	3.89	25.18	7	9	2.41985	20.57	5	9	7.94191	35.11	9	10	3.58403	19.86	7	9	2.31924	13.48	4	6	8.66667	8.33333	0.961538	-0.0565835	≥ 0.05	F:structural constituent of ribosome; P:translation; C:ribonucleoprotein complex; C:ribosome; C:intracellular
A0A023FKS3	Putative enoyl-coa hydratase/isomerase (Fragment)	Amblyomma cajennense PE	374	40.8906	6.69775	1	4	7	17	0	0	0	0	0	0	0	0	3.91747	6.68	2	2	0	12.57	4	4	2.09903	6.68	2	3	2.16305	12.83	4	4	0.666667	3.66667	5.5	2.45943	≥ 0.05	F:fatty-acyl-CoA binding; P:metabolic process; F:catalytic activity; F:isomerase activity
A0A023FKS6	Putative bifunctional leukotriene a4 hydrolase/aminopeptidase lta4h (Fragment)	Amblyomma cajennense PE	568	64.0963	5.73193	1	1	5	12	0	0	0	0	0	0	0	0	3.65417	9.15	4	5	0	0	0	0	2.83013	2.64	1	1	1.70386	1.76	1	3	1.66667	1.33333	0.8	-0.321928	≥ 0.05	P:proteolysis; F:metallopeptidase activity; F:hydrolase activity; F:aminopeptidase activity; P:leukotriene biosynthetic process; F:zinc ion binding
A0A023FKS7	Putative arginyl-trna-protein transferase (Fragment)	Amblyomma cajennense PE	375	42.997	9.01221	1	1	11	22	0	17.6	6	6	0	0	0	0	2.92026	16.27	5	7	0	0	0	0	1.68463	5.33	2	3	0	5.33	2	2	4.33333	1.66667	0.384615	-1.37851	≥ 0.05	P:protein arginylation; F:transferase activity; F:arginyltransferase activity
A0A023FKT5	Putative ubiquinol cytochrome c reductase subunit qcr2 (Fragment)	Amblyomma cajennense PE	342	36.6853	9.46631	1	1	10	22	2.07577	17.84	6	6	0	12.87	3	4	4.47433	21.64	5	6	0	0	0	0	0	0	0	0	1.69388	24.27	6	6	5.33333	2	0.375	-1.41504	≥ 0.05	F:metal ion binding; P:metabolic process; F:catalytic activity
A0A023FKU2	Putative stress-induced-phosphoprotein 1 (Fragment)	Amblyomma cajennense PE	344	39.1779	6.99072	1	3	26	56	8.11613	18.31	6	7	9.89641	22.67	7	8	8.47961	23.84	7	9	4.94111	19.77	5	6	3.478	24.71	7	8	1.9375	25.29	8	8	8	7.33333	0.916667	-0.125531	≥ 0.05	-
A0A023FKU3	Putative beta-dystrobrevin (Fragment)	Amblyomma cajennense PE	381	42.9597	7.13721	2	1	7	8	0	0	0	0	0	0	0	0	0	5.51	2	2	0	0	0	0	0	4.46	1	1	0	7.09	2	2	0.666667	1	1.5	0.584963	≥ 0.05	F:zinc ion binding
A0A023FKU6	Putative rna-binding protein nova1/pasilla (Fragment)	Amblyomma cajennense PE	287	30.6808	9.33447	2	1	7	8	0	19.16	3	3	0	11.85	2	2	0	0	0	0	0	0	0	0	0	0	0	0	0	3.48	1	1	1.66667	0.333333	0.2	-2.32193	≥ 0.05	F:RNA binding; F:nucleic acid binding
A0A023FKU9	Putative puf family rna-binding protein (Fragment)	Amblyomma cajennense PE	381	43.5129	8.85107	1	5	14	18	0	10.5	3	3	1.7202	16.01	7	7	3.24871	13.65	5	5	0	13.65	3	3	0	0	0	0	0	0	0	0	5	1	0.2	-2.32193	≥ 0.05	F:RNA binding
A0A023FKV5	Putative glutaminyl-trna synthetase	Amblyomma cajennense PE	1519	169.664	8.20654	1	2	58	86	4.15439	11.98	15	17	0	7.9	9	9	0	10.86	13	13	1.76503	11.92	15	16	1.60927	3.75	4	4	1.62016	5.73	9	9	13	9.66667	0.74359	-0.427421	≥ 0.05	F:ligase activity; P:tRNA aminoacylation for protein translation; F:proline-tRNA ligase activity; F:nucleotide binding; C:cytoplasm; P:translation; F:ATP binding; F:glutamate-tRNA ligase activity; P:prolyl-tRNA aminoacylation; F:aminoacyl-tRNA ligase activity; F:ligase activity, forming aminoacyl-tRNA and related compounds; P:tRNA aminoacylation; P:glutamyl-tRNA aminoacylation
A0A023FKV8	Methionine aminopeptidase 1	Amblyomma cajennense PE	385	42.8432	7.02002	3	2	10	13	3.30687	10.91	3	3	2.17048	9.35	2	2	0	5.45	1	1	2.04101	5.97	2	2	0	0	0	0	0	4.68	2	2	2	1.33333	0.666667	-0.584963	≥ 0.05	C:cytosolic ribosome; F:hydrolase activity; C:cytoplasm; F:metalloexopeptidase activity; F:metalloaminopeptidase activity; F:peptidase activity; P:proteolysis; F:metal ion binding; P:protein initiator methionine removal; F:aminopeptidase activity
A0A023FKX2	Putative zinc-binding oxidoreductase	Amblyomma cajennense PE	392	42.5371	8.73389	2	1	7	9	0	0	0	0	0	9.69	3	3	0	11.99	2	2	0	9.95	3	4	0	0	0	0	0	0	0	0	1.66667	1.33333	0.8	-0.321928	≥ 0.05	P:oxidation-reduction process; F:oxidoreductase activity; F:zinc ion binding
A0A023FKX5	Uncharacterized protein	Amblyomma cajennense PE	352	39.8723	5.12256	1	2	8	18	2.13958	9.66	2	2	2.39282	11.36	3	3	2.06504	17.33	4	5	2.06815	9.09	2	2	2.38601	4.26	1	1	0	0	0	0	3.33333	1	0.3	-1.73697	≥ 0.05	-
A0A023FKX8	Putative deoxyribonuclease ii (Fragment)	Amblyomma cajennense PE	291	33.6118	9.68604	2	2	13	39	2.15894	14.09	5	6	0	4.47	1	1	2.10868	4.47	1	3	0	14.09	3	6	2.08417	9.28	3	9	0	14.43	4	6	3.33333	7	2.1	1.07039	≥ 0.05	P:DNA metabolic process; F:deoxyribonuclease II activity
A0A023FKY0	Putative confirmed by transcript evidence	Amblyomma cajennense PE	615	63.0698	9.21729	1	4	9	10	0	4.55	4	4	0	5.04	2	2	0	0	0	0	0	0	0	0	0	0	0	0	0	3.41	2	2	2	0.666667	0.333333	-1.58496	≥ 0.05	-
A0A023FKY4	Putative adenylate cyclase ixodes scapularis adenylate cyclase	Amblyomma cajennense PE	355	39.1274	7.03467	1	1	3	6	2.0558	11.55	2	2	0	6.76	1	1	0	14.37	2	3	0	0	0	0	0	0	0	0	0	0	0	0	2	0	0	#NUM!	≥ 0.05	C:integral component of membrane; P:transmembrane transport
A0A023FKY9	Putative amyloid beta protein (Fragment)	Amblyomma cajennense PE	355	41.113	7.13721	1	2	7	11	1.75879	13.8	3	4	0	0	0	0	0	7.61	2	2	0	0	0	0	1.75375	8.73	2	3	0	0	0	0	2	1	0.5	-1	≥ 0.05	-
A0A023FKZ0	Putative titin	Amblyomma cajennense PE	626	69.2748	5.30029	1	1	3	4	0	0	0	0	2.22751	3.51	1	1	0	2.4	1	1	0	0	0	0	0	0	0	0	0	4.15	2	2	0.666667	0.666667	1	0	≥ 0.05	-
A0A023FKZ1	Putative lem domain protein (Fragment)	Amblyomma cajennense PE	150	17.3361	9.75928	1	1	7	11	0	26.67	3	4	0	28.67	4	5	0	0	0	0	0	11.33	2	2	0	0	0	0	0	0	0	0	3	0.666667	0.222222	-2.16993	≥ 0.05	C:integral component of nuclear inner membrane
A0A023FKZ3	Uncharacterized protein	Amblyomma cajennense PE	357	40.3274	7.06396	1	1	3	4	0	6.72	2	2	0	0	0	0	0	0	0	0	0	0	0	0	0	0	0	0	0	7.84	2	2	0.666667	0.666667	1	0	≥ 0.05	P:metabolic process; F:GDP-D-glucose phosphorylase activity
A0A023FKZ8	Putative pentatricopeptide repeat-containing protein (Fragment)	Amblyomma cajennense PE	296	32.985	6.60986	1	1	2	3	0	0	0	0	0	0	0	0	0	0	0	0	0	0	0	0	0	12.5	2	3	0	0	0	0	0	1	#DIV/0!	#DIV/0!	≥ 0.05	-
A0A023FL06	Putative paf1/rna polymer (Fragment)	Amblyomma cajennense PE	657	74.2051	5.73193	1	3	20	27	0	8.83	5	6	0	4.11	3	3	1.62817	9.13	4	4	0	0	0	0	1.49875	11.11	8	8	0	0	0	0	4.33333	2.66667	0.615385	-0.70044	≥ 0.05	P:DNA-templated transcription, initiation; P:histone modification; C:Cdc73/Paf1 complex; P:transcription elongation from RNA polymerase II promoter; C:nucleus; F:DNA binding
A0A023FL16	Putative translation initiation factor 3 subunit a eif-3a (Fragment)	Amblyomma cajennense PE	673	82.0779	8.83643	1	0	17	29	1.64254	8.92	6	6	4.73841	9.06	6	7	0	0	0	0	0	0	0	0	1.63255	6.69	5	6	0	0	0	0	4.33333	2	0.461538	-1.11548	≥ 0.05	P:translational initiation; F:translation initiation factor activity; C:eukaryotic translation initiation factor 3 complex
A0A023FL31	Putative proteasome inhibitor ixodes scapularis proteasome inhibitor	Amblyomma cajennense PE	301	32.9847	8.23584	3	2	8	15	0	0	0	0	1.8234	12.29	3	3	0	0	0	0	3.87838	13.95	3	5	1.65684	9.97	2	2	1.66576	7.31	2	2	1	3	3	1.58496	≥ 0.05	C:proteasome complex
A0A023FL47	Putative acyl-coa synthetase (Fragment)	Amblyomma cajennense PE	370	41.6238	7.32764	1	1	4	4	0	0	0	0	0	0	0	0	0	0	0	0	0	14.05	3	3	0	3.51	1	1	0	0	0	0	0	1.33333	#DIV/0!	#DIV/0!	≥ 0.05	P:metabolic process; F:catalytic activity
A0A023FL55	Putative p-type atpase (Fragment)	Amblyomma cajennense PE	747	83.0721	7.54736	1	7	17	26	0	8.3	4	4	1.93221	13.52	6	7	0	0	0	0	0	8.3	5	5	2.39763	8.43	4	4	0	7.5	3	3	3.66667	4	1.09091	0.125531	≥ 0.05	F:metal ion binding; F:ATPase activity; F:ATP binding; F:hydrolase activity; C:integral component of membrane; P:metabolic process; F:nucleotide binding; P:cation transport
A0A023FL66	Putative focal adhesion protein tensin (Fragment)	Amblyomma cajennense PE	766	83.8532	9.46631	2	3	17	46	0	0	0	0	0	10.57	6	8	0	8.75	4	4	0	6.53	4	4	1.65406	13.19	7	8	0	12.27	6	9	4	7	1.75	0.807355	≥ 0.05	-
A0A023FL71	Putative ankyrin (Fragment)	Amblyomma cajennense PE	771	83.3582	5.77002	1	3	13	18	0	5.19	3	3	0	8.04	4	4	0	7.26	4	5	0	0	0	0	0	0	0	0	2.06271	8.95	5	6	4	2	0.5	-1	≥ 0.05	-
A0A023FL79	Putative actin-related protein arp2/3 complex subunit arp3	Amblyomma cajennense PE	418	47.159	6.62451	4	1	12	21	1.63273	5.02	3	3	0	12.92	3	3	0	11.24	3	3	4.02039	8.85	4	4	1.34668	6.46	3	3	0	8.13	2	2	3	3	1	0	≥ 0.05	-
A0A023FL81	Putative deah-box rna helicase (Fragment)	Amblyomma cajennense PE	378	42.427	9.02686	1	2	12	19	2.23636	15.87	4	4	0	4.23	1	1	0	13.49	3	4	1.3272	5.82	2	2	1.49055	7.41	3	3	0	7.67	2	3	3	2.66667	0.888889	-0.169925	≥ 0.05	F:helicase activity; P:metabolic process
A0A023FL84	Putative chloride channel ixodes scapularis chloride channel (Fragment)	Amblyomma cajennense PE	815	89.9413	7.62061	7	12	22	34	1.73095	9.69	6	7	1.39711	4.42	3	5	0	7.85	5	5	0	0	0	0	0	14.11	5	5	0	9.08	4	4	5.66667	3	0.529412	-0.917538	≥ 0.05	P:regulation of anion transmembrane transport; F:ion channel activity; C:integral component of membrane; C:membrane; P:ion transport; P:transport; P:transmembrane transport; P:ion transmembrane transport; F:voltage-gated chloride channel activity; P:chloride transport
A0A023FL91	Putative signal recognition particle receptor alpha subunit (Fragment)	Amblyomma cajennense PE	311	33.8372	8.6167	2	2	4	4	0	0	0	0	0	0	0	0	0	19.94	4	4	0	0	0	0	0	0	0	0	0	0	0	0	1.33333	0	0	#NUM!	≥ 0.05	F:GTP binding; F:signal recognition particle binding; F:GTPase activity; P:SRP-dependent cotranslational protein targeting to membrane; C:signal recognition particle receptor complex; P:metabolic process; P:intracellular protein transport
A0A023FLA2	Putative serine proteinase inhibitor (Fragment)	Amblyomma cajennense PE	385	42.7318	6.31592	1	2	9	16	0	8.57	2	2	0	17.14	4	4	0	10.65	3	3	0	5.19	1	1	1.77416	7.53	4	4	0	0	0	0	3	1.66667	0.555556	-0.847997	≥ 0.05	C:extracellular space
A0A023FLA3	Putative transcriptional coactivator	Amblyomma cajennense PE	894	99.9355	6.69775	2	6	27	39	2.39832	9.96	9	9	0	2.68	2	2	0	14.43	7	8	4.09048	8.28	7	7	2.11798	9.06	6	6	1.80918	5.82	4	4	6.33333	5.66667	0.894737	-0.160465	≥ 0.05	C:RISC complex; P:posttranscriptional gene silencing by RNA; P:regulation of nucleic acid-templated transcription; P:gene silencing by RNA; F:transcription cofactor activity
A0A023FLA5	Putative cysteine proteinase ixodes scapularis cysteine proteinase	Amblyomma cajennense PE	423	48.1651	6.16357	1	6	19	28	0	11.58	4	5	0	0	0	0	1.64687	9.46	4	4	0	11.58	3	5	0	11.82	4	4	0	5.67	2	2	3	3.66667	1.22222	0.289507	≥ 0.05	P:proteolysis; F:polysaccharide binding; F:scavenger receptor activity; F:cysteine-type peptidase activity; P:receptor-mediated endocytosis; P:immune response
A0A023FLA9	Putative regulation of ubiquitin-protein ligase (Fragment)	Amblyomma cajennense PE	425	47.088	7.40088	4	1	9	10	0	11.76	4	4	0	4.24	2	2	0	0	0	0	0	0	0	0	0	0	0	0	2.354	10.12	3	3	2	1	0.5	-1	≥ 0.05	F:ligase activity; P:metabolic process
A0A023FLB0	Putative isocitrate dehydrogenase gamma subunit	Amblyomma cajennense PE	391	43.3204	8.29443	3	1	8	11	0	5.12	2	2	0	0	0	0	0	15.35	4	4	0	0	0	0	0	13.81	5	5	0	0	0	0	2	1.66667	0.833333	-0.263034	≥ 0.05	P:oxidation-reduction process; F:magnesium ion binding; P:tricarboxylic acid cycle; F:oxidoreductase activity, acting on the CH-OH group of donors, NAD or NADP as acceptor; F:isocitrate dehydrogenase (NAD+) activity; F:NAD binding
A0A023FLB1	Putative ubiquitin-like modifier activating enzyme 1 (Fragment)	Amblyomma cajennense PE	982	108.585	5.63037	1	2	19	31	3.47432	2.95	3	3	0	6.92	5	5	5.53183	6.01	4	7	5.12911	3.87	2	3	3.89551	4.58	3	4	1.94725	2.24	2	2	5	3	0.6	-0.736966	≥ 0.05	F:ATP binding; F:ligase activity; F:nucleotide binding; F:small protein activating enzyme activity; P:cellular protein modification process
A0A023FLB6	Putative calcium-transporting atpase sarcoplasmic/endoplasmic reticulum type calcium pump isoform 1	Amblyomma cajennense PE	1023	112.139	5.49072	1	1	28	47	0	11.63	8	9	1.61699	3.13	4	6	0	0	0	0	1.66981	5.08	5	7	1.92919	7.04	6	6	1.66233	4.79	5	8	5	7	1.4	0.485427	≥ 0.05	P:calcium ion transport; C:integral component of membrane; C:membrane; F:hydrolase activity; P:ion transport; P:transport; F:nucleotide binding; F:ATP binding; F:calcium-transporting ATPase activity; F:metal ion binding; C:sarcoplasmic reticulum membrane; C:endoplasmic reticulum; P:metabolic process; P:calcium ion transmembrane transport
A0A023FLB9	Putative transcription factor 5qnca (Fragment)	Amblyomma cajennense PE	1094	121.909	7.85498	2	1	25	32	0	0	0	0	0	7.86	7	8	0	0	0	0	0	8.68	6	7	1.26063	9.6	7	8	0	11.43	8	9	2.66667	8	3	1.58496	≥ 0.05	-
A0A023FLC3	Putative tomosyn	Amblyomma cajennense PE	1113	121.997	6.03662	3	3	24	42	1.65153	7.28	6	7	0	4.76	5	5	2.24987	4.94	5	7	0	3.5	4	4	0	5.48	4	5	1.94005	7.28	7	9	6.33333	6	0.947368	-0.0780025	≥ 0.05	-
A0A023FLC5	Putative sulfotransferase	Amblyomma cajennense PE	314	36.3393	7.06396	1	3	9	15	1.63382	21.34	4	5	0	9.87	2	2	0	8.28	2	2	0	16.24	4	4	0	0	0	0	0	11.46	2	2	3	2	0.666667	-0.584963	≥ 0.05	F:transferase activity; P:metabolic process; F:sulfotransferase activity
A0A023FLD6	Putative ribosomal protein s6 kinase (Fragment)	Amblyomma cajennense PE	427	48.1587	7.38623	1	1	10	10	0	0	0	0	0	0	0	0	0	14.52	4	4	0	0	0	0	0	7.49	3	3	0	0	0	0	1.33333	1	0.75	-0.415037	≥ 0.05	F:kinase activity; F:ATP binding; F:protein kinase activity; P:phosphorylation; F:transferase activity; F:nucleotide binding; P:protein phosphorylation; F:protein serine/threonine kinase activity
A0A023FLE1	Uncharacterized protein (Fragment)	Amblyomma cajennense PE	402	43.363	4.89404	1	1	4	4	0	0	0	0	0	0	0	0	0	0	0	0	0	0	0	0	0	0	0	0	0	17.91	4	4	0	1.33333	#DIV/0!	#DIV/0!	≥ 0.05	-
A0A023FLE2	Putative nuclear pore complex nup160 component (Fragment)	Amblyomma cajennense PE	1141	128.285	6.62451	1	18	28	49	0	8.06	5	5	0	0	0	0	0	12.62	9	10	9.26607	10.6	10	11	0	8.15	8	10	2.04631	4.47	4	5	5	8.66667	1.73333	0.793549	≥ 0.05	-
A0A023FLF2	Putative 5'-nucleotidase (Fragment)	Amblyomma cajennense PE	428	47.7253	5.78271	2	1	4	4	0	0	0	0	0	0	0	0	0	0	0	0	0	8.41	2	2	0	0	0	0	0	0	0	0	0	0.666667	#DIV/0!	#DIV/0!	≥ 0.05	P:nucleotide catabolic process; F:hydrolase activity
A0A023FLF8	Putative ornithine aminotransferase	Amblyomma cajennense PE	431	47.2557	7.26904	1	2	7	10	1.86585	5.57	2	2	0	0	0	0	0	0	0	0	0	12.76	5	6	0	0	0	0	0	0	0	0	0.666667	2	3	1.58496	≥ 0.05	F:transferase activity; P:metabolic process; F:catalytic activity; F:pyridoxal phosphate binding; F:transaminase activity
A0A023FLF9	Putative tousled-like protein kinase (Fragment)	Amblyomma cajennense PE	407	46.732	7.89893	2	1	3	5	0	14.74	3	4	0	0	0	0	0	0	0	0	0	0	0	0	0	6.63	1	1	0	0	0	0	1.33333	0.333333	0.25	-2	≥ 0.05	F:kinase activity; F:ATP binding; F:protein kinase activity; P:phosphorylation; F:nucleotide binding; P:protein phosphorylation
A0A023FLG8	Putative short-chain acyl-coa dehydrogenase	Amblyomma cajennense PE	409	44.5639	8.30908	1	1	8	19	1.88004	11.74	3	3	4.98769	22.98	5	7	1.6844	8.56	2	3	0	8.56	2	3	0	4.65	1	1	0	0	0	0	4.33333	1.33333	0.307692	-1.70044	≥ 0.05	P:oxidation-reduction process; F:oxidoreductase activity; F:acyl-CoA dehydrogenase activity; P:metabolic process; F:oxidoreductase activity, acting on the CH-CH group of donors; F:flavin adenine dinucleotide binding
A0A023FLI0	Putative renin receptor-like isoform 1	Amblyomma cajennense PE	369	40.6652	5.98584	1	1	6	13	0	0	0	0	0	0	0	0	0	10.57	3	3	0	0	0	0	0	7.59	2	3	1.61369	12.47	4	4	1	2.33333	2.33333	1.22239	≥ 0.05	F:receptor activity; C:integral component of membrane
A0A023FLI1	Putative cyclin s (Fragment)	Amblyomma cajennense PE	326	36.1045	11.019	2	6	11	15	0	10.12	2	2	0	0	0	0	1.72684	29.14	7	7	1.76205	2.15	1	1	0	18.1	4	5	0	0	0	0	3	2	0.666667	-0.584963	≥ 0.05	F:protein kinase binding; P:regulation of transcription, DNA-templated; P:regulation of cyclin-dependent protein serine/threonine kinase activity; C:nucleus
A0A023FLI3	Putative 26s proteasome regulatory subunit ixodes scapularis 26s proteasome regulatory subunit (Fragment)	Amblyomma cajennense PE	373	41.7964	6.80029	3	1	7	8	0	9.38	3	3	0	0	0	0	0	0	0	0	0	0	0	0	0	8.58	3	3	0	0	0	0	1	1	1	0	≥ 0.05	F:ATP binding; C:proteasome complex; F:nucleotide binding
A0A023FLJ2	Putative ubiquitin-like modifier activating enzyme 3 (Fragment)	Amblyomma cajennense PE	446	50.0861	6.29053	2	1	12	19	3.47883	21.08	6	6	0	14.8	4	5	0	11.88	3	3	0	0	0	0	0	6.73	2	2	3.66632	8.97	3	3	4.66667	1.66667	0.357143	-1.48543	≥ 0.05	F:ATP binding; P:protein neddylation; F:small protein activating enzyme activity; F:acid-amino acid ligase activity
A0A023FLJ5	Uncharacterized protein	Amblyomma cajennense PE	332	34.6478	8.1626	5	3	4	10	4.32979	11.45	2	5	0	0	0	0	2.06849	11.45	2	2	0	0	0	0	2.40488	13.25	2	3	0	0	0	0	2.33333	1	0.428571	-1.22239	≥ 0.05	P:branched-chain amino acid catabolic process; P:oxidation-reduction process; F:3-hydroxyisobutyrate dehydrogenase activity; F:oxidoreductase activity; F:phosphogluconate dehydrogenase (decarboxylating) activity; P:valine catabolic process; F:NAD binding
A0A023FLK0	Putative phosphoglucomutase/phosphomannomutase (Fragment)	Amblyomma cajennense PE	451	50.8801	6.16357	1	2	7	8	0	0	0	0	2.00884	18.4	5	5	0	5.32	2	2	0	0	0	0	0	0	0	0	0	0	0	0	2.33333	0	0	#NUM!	≥ 0.05	P:carbohydrate metabolic process; F:intramolecular transferase activity, phosphotransferases; P:organic substance metabolic process
A0A023FLK2	Uncharacterized protein (Fragment)	Amblyomma cajennense PE	334	37.0365	9.64209	1	3	14	48	0	9.28	2	2	0	29.34	7	12	2.24301	16.17	4	6	1.89299	12.57	4	5	2.20667	17.37	5	7	7.38853	11.98	5	10	6.66667	7.33333	1.1	0.137504	≥ 0.05	-
A0A023FLK6	Putative neural cell adhesion molecule l1 (Fragment)	Amblyomma cajennense PE	1580	171.384	6.02393	2	11	46	91	1.68324	10.19	12	13	1.62091	7.03	8	8	1.62662	14.18	15	17	0	8.04	8	9	2.01599	7.53	9	12	0	8.99	10	13	12.6667	11.3333	0.894737	-0.160465	≥ 0.05	F:calcium ion binding
A0A023FLK7	Putative rna splicing factor	Amblyomma cajennense PE	455	52.8343	7.6792	1	2	14	18	0	0	0	0	0	2.64	1	1	0	11.65	3	3	0	14.51	4	4	1.7157	11.21	4	5	0	14.07	5	5	1.33333	4.66667	3.5	1.80735	≥ 0.05	F:nucleic acid binding; F:zinc ion binding
A0A023FLM5	Putative microplusin 1	Amblyomma cajennense PE	115	12.594	6.3667	1	2	6	9	0	29.57	3	3	0	0	0	0	1.62024	28.7	3	4	0	0	0	0	0	0	0	0	0	21.74	2	2	2.33333	0.666667	0.285714	-1.80735	≥ 0.05	-
A0A023FLN5	Putative serine carboxypeptidase lysosomal cathepsin a	Amblyomma cajennense PE	493	55.3961	6.46826	2	3	6	9	0	16.43	4	4	0	0	0	0	0	0	0	0	0	0	0	0	1.64373	6.9	2	2	0	0	0	0	1.33333	0.666667	0.5	-1	≥ 0.05	P:proteolysis; F:carboxypeptidase activity; F:serine-type carboxypeptidase activity
A0A023FLN7	Uncharacterized protein	Amblyomma cajennense PE	467	53.4733	4.90674	1	0	11	26	1.23831	7.28	4	4	0	6.42	3	3	0	0	0	0	3.18038	8.57	4	5	0	9.85	4	4	3.045	10.92	4	4	2.33333	4.33333	1.85714	0.893085	≥ 0.05	-
A0A023FLP3	Uncharacterized protein	Amblyomma cajennense PE	340	37.431	6.11279	2	1	5	9	0	11.47	2	3	0	0	0	0	0	0	0	0	0	10.59	2	3	0	0	0	0	0	0	0	0	1	1	1	0	≥ 0.05	-
A0A023FLP9	Putative glutaredoxin-related protein	Amblyomma cajennense PE	166	17.6421	6.771	1	1	5	6	0	0	0	0	0	0	0	0	0	0	0	0	0	0	0	0	1.66215	17.47	3	3	0	0	0	0	0	1	#DIV/0!	#DIV/0!	≥ 0.05	P:oxidation-reduction process; P:cell redox homeostasis; F:electron carrier activity; F:protein disulfide oxidoreductase activity; C:cell
A0A023FLQ0	Putative sugar pentulose and hexulose kinase	Amblyomma cajennense PE	471	50.8306	6.56592	1	4	12	24	0	7.64	4	5	0	9.13	3	3	0	0	0	0	1.90055	12.1	5	6	0	0	0	0	0	8.7	4	4	2.66667	3.33333	1.25	0.321928	≥ 0.05	F:kinase activity; P:phosphorylation; P:carbohydrate metabolic process; F:phosphotransferase activity, alcohol group as acceptor
A0A023FLQ1	Nucleoside diphosphate kinase	Amblyomma cajennense PE	171	19.3652	9.48096	2	3	8	18	0	19.88	3	4	1.65251	16.96	2	2	2.26818	13.45	4	4	0	22.22	2	2	1.76323	5.85	1	1	0	20.47	2	3	3.33333	2	0.6	-0.736966	≥ 0.05	F:transferase activity; P:nucleic acid phosphodiester bond hydrolysis; P:phosphorylation; P:GTP biosynthetic process; P:UTP biosynthetic process; F:nucleotide binding; F:ATP binding; F:kinase activity; F:endonuclease activity; F:nucleoside diphosphate kinase activity; P:nucleoside diphosphate phosphorylation; P:CTP biosynthetic process
A0A023FLR0	Putative spindle pole body protein	Amblyomma cajennense PE	341	37.1024	5.80811	3	1	6	15	1.7877	4.11	2	2	0	0	0	0	1.75849	12.02	4	5	2.03951	1.76	1	1	3.94842	1.76	1	2	1.84478	7.04	2	2	2.33333	1.66667	0.714286	-0.485427	≥ 0.05	-
A0A023FLR5	Putative acetylcholinesterase/butyrylcholinesterase (Fragment)	Amblyomma cajennense PE	478	53.192	4.99561	1	2	6	9	0	14.23	4	4	0	6.49	2	2	0	10.04	3	3	0	0	0	0	0	0	0	0	0	0	0	0	3	0	0	#NUM!	≥ 0.05	F:hydrolase activity; P:metabolic process; F:cholinesterase activity
A0A023FLT0	Putative ca2+/calmodulin-dependent protein (Fragment)	Amblyomma cajennense PE	487	55.833	5.8208	1	2	14	21	1.89618	6.37	3	3	0	0	0	0	0	6.78	3	3	3.94646	13.96	6	6	0	6.78	3	3	3.4716	4.52	2	3	2	4	2	1	≥ 0.05	F:kinase activity; F:ATP binding; F:protein kinase activity; P:phosphorylation; F:transferase activity; F:nucleotide binding; P:protein phosphorylation
A0A023FLT4	Putative ribosomal protein	Amblyomma cajennense PE	490	57.1543	8.22119	1	1	9	12	2.29186	8.37	3	3	0	4.49	2	2	0	6.94	2	2	1.83268	4.49	2	2	0	10.82	3	3	0	0	0	0	2.33333	1.66667	0.714286	-0.485427	≥ 0.05	F:structural constituent of ribosome; C:mitochondrion; P:translation; C:ribosome
A0A023FLU0	Putative alpha-2-macroglobulin-like protein (Fragment)	Amblyomma cajennense PE	938	102.923	5.45264	1	2	4	6	0	0	0	0	0	1.6	1	1	0	4.8	3	3	0	0	0	0	2.21931	1.92	1	1	0	0	0	0	1.33333	0.333333	0.25	-2	≥ 0.05	P:negative regulation of endopeptidase activity; F:endopeptidase inhibitor activity
A0A023FLU2	Uncharacterized protein (Fragment)	Amblyomma cajennense PE	212	23.7099	7.26904	1	3	4	11	0	10.38	1	2	0	0	0	0	2.34124	10.85	2	7	0	0	0	0	0	11.32	2	2	0	0	0	0	3	0.666667	0.222222	-2.16993	≥ 0.05	-
A0A023FLU7	Putative u3 small nucleolar rna-associated protein 6 (Fragment)	Amblyomma cajennense PE	500	57.2867	6.80029	1	3	8	10	0	0	0	0	1.76994	4.8	3	4	0	9.4	3	3	0	0	0	0	0	6	2	2	0	2.2	1	1	2.33333	1	0.428571	-1.22239	≥ 0.05	P:RNA processing; C:intracellular
A0A023FLU8	Putative eukaryotic translation initiation factor 3 subunit 2 beta protein (Fragment)	Amblyomma cajennense PE	350	39.4171	6.48096	5	6	12	19	4.37874	25.71	6	6	0	0	0	0	0	16.57	3	3	1.66894	4	1	1	1.61437	8.86	2	3	5.10282	17.71	4	4	3	2.66667	0.888889	-0.169925	≥ 0.05	P:translational initiation; P:translation; C:cytoplasm; F:translation initiation factor activity; C:eukaryotic translation initiation factor 3 complex
A0A023FLU9	Putative methyltransferase-like protein 17 mitochondrial	Amblyomma cajennense PE	346	39.3425	8.89502	1	4	6	12	0	0	0	0	0	3.18	1	1	0	0	0	0	0	8.09	2	4	0	0	0	0	1.60653	14.45	3	4	0.333333	2.66667	8	3	≥ 0.05	F:methyltransferase activity; P:translation; F:transferase activity; P:methylation
A0A023FLW1	Adenylyl cyclase-associated protein (Fragment)	Amblyomma cajennense PE	355	38.2648	9.23193	1	1	15	43	4.35993	23.38	7	7	1.75086	5.92	2	2	1.88063	11.27	3	3	6.93978	24.51	8	8	4.42162	13.8	5	5	4.46808	20.28	6	6	4	6.33333	1.58333	0.662965	≥ 0.05	F:actin binding; P:cytoskeleton organization
A0A023FLW3	Importin subunit alpha	Amblyomma cajennense PE	512	55.6968	5.16064	1	1	11	20	1.97749	4.88	3	3	1.71522	5.66	2	2	2.09152	9.96	4	4	0	6.64	3	4	1.78473	6.05	3	3	0	0	0	0	3	2.33333	0.777778	-0.36257	≥ 0.05	C:cytoplasm; P:protein transport; F:protein transporter activity; P:transport; P:protein import into nucleus; C:nucleus
A0A023FLW5	Putative golgi reassembly stacking protein grasp65	Amblyomma cajennense PE	355	36.9204	5.021	6	1	5	9	1.63881	2.54	1	2	1.93699	9.86	2	2	0	4.23	1	1	2.02662	3.66	2	2	0	8.45	2	2	0	0	0	0	1.66667	1.33333	0.8	-0.321928	≥ 0.05	-
A0A023FLX4	Putative mitochondrial fatty acid anion carrier protein/uncoupling protein (Fragment)	Amblyomma cajennense PE	197	21.5889	9.14404	1	1	8	9	0	31.98	4	4	0	14.21	2	2	0	19.29	3	3	0	0	0	0	0	0	0	0	0	0	0	0	3	0	0	#NUM!	≥ 0.05	C:integral component of membrane; P:mitochondrial transport; C:membrane; C:mitochondrial membrane; P:transport
A0A023FLX7	Putative emp24/gp25l/p24 family of membrane trafficking (Fragment)	Amblyomma cajennense PE	240	27.1596	6.7124	3	1	2	2	0	14.58	2	2	0	0	0	0	0	0	0	0	0	0	0	0	0	0	0	0	0	0	0	0	0.666667	0	0	#NUM!	≥ 0.05	C:integral component of membrane; C:membrane; P:transport
A0A023FLZ4	Uncharacterized protein	Amblyomma cajennense PE	302	34.4308	5.40186	3	4	8	12	0	0	0	0	0	6.62	3	3	0	10.26	2	3	1.62325	8.61	2	3	1.62954	9.6	2	2	0	4.97	1	1	2	2	1	0	≥ 0.05	-
A0A023FM01	Putative phenylalanyl-trna synthetase beta subunit	Amblyomma cajennense PE	546	61.0938	6.29053	2	6	11	15	0	0	0	0	0	0	0	0	3.90884	11.9	4	4	0	0	0	0	0	9.89	4	4	0	6.41	3	3	1.33333	2.33333	1.75	0.807355	≥ 0.05	F:RNA binding; F:ATP binding; F:phenylalanine-tRNA ligase activity; C:cytoplasm; F:aminoacyl-tRNA ligase activity; F:magnesium ion binding; F:nucleotide binding; P:phenylalanyl-tRNA aminoacylation
A0A023FM02	Putative isocitrate dehydrogenase gamma subunit (Fragment)	Amblyomma cajennense PE	397	43.4676	8.54346	2	2	6	8	0	0	0	0	0	0	0	0	0	0	0	0	0	7.05	2	3	0	0	0	0	0	14.11	3	3	0	2	#DIV/0!	#DIV/0!	≥ 0.05	F:NAD binding; C:mitochondrion; P:tricarboxylic acid cycle; P:oxidation-reduction process; F:isocitrate dehydrogenase (NAD+) activity; F:oxidoreductase activity, acting on the CH-OH group of donors, NAD or NADP as acceptor; F:oxidoreductase activity; F:metal ion binding; F:magnesium ion binding
A0A023FM08	Putative serine/threonine protein kinase (Fragment)	Amblyomma cajennense PE	551	64.9613	9.21729	2	1	21	46	1.25032	7.62	6	7	2.06781	8.89	4	4	0	11.98	6	6	4.46518	11.62	5	7	1.26363	11.07	6	6	4.95987	10.53	5	6	5.66667	6.33333	1.11765	0.160465	≥ 0.05	F:kinase activity; P:phosphorylation; P:protein phosphorylation; F:protein serine/threonine kinase activity
A0A023FM12	Putative asparaginyl-trna synthetase mitochondrial	Amblyomma cajennense PE	554	63.429	6.07471	2	5	11	13	0	0	0	0	0	0	0	0	0	0	0	0	0	7.58	3	3	0	6.32	3	3	0	7.94	4	4	0	3.33333	#DIV/0!	#DIV/0!	≥ 0.05	F:ligase activity; P:asparaginyl-tRNA aminoacylation; P:tRNA aminoacylation for protein translation; F:nucleic acid binding; F:nucleotide binding; C:cytoplasm; P:translation; F:ATP binding; F:asparagine-tRNA ligase activity; F:aminoacyl-tRNA ligase activity
A0A023FM14	Putative vasa intronic protein (Fragment)	Amblyomma cajennense PE	368	40.6506	5.40186	1	1	5	5	0	0	0	0	0	0	0	0	0	0	0	0	0	0	0	0	0	0	0	0	0	9.24	3	3	0	1	#DIV/0!	#DIV/0!	≥ 0.05	-
A0A023FM16	Putative pyridine nucleotide-disulfide oxidoreductase (Fragment)	Amblyomma cajennense PE	555	59.8776	5.92236	1	1	10	21	1.90942	9.01	5	5	0	0	0	0	1.65807	8.29	3	5	0	0	0	0	0	4.5	3	5	1.65027	6.67	3	5	3.33333	3.33333	1	0	≥ 0.05	F:electron carrier activity; F:flavin adenine dinucleotide binding; P:oxidation-reduction process; F:oxidoreductase activity; C:cell; F:oxidoreductase activity, acting on a sulfur group of donors, NAD(P) as acceptor; F:thioredoxin-disulfide reductase activity; P:cell redox homeostasis; F:protein disulfide oxidoreductase activity
A0A023FM19	Putative nocturnin	Amblyomma cajennense PE	370	42.0288	5.2876	2	2	10	25	3.89662	7.84	2	3	4.40803	6.49	2	2	2.25456	8.65	2	2	1.68788	6.76	2	2	2.16178	2.43	1	2	3.54873	11.62	4	5	2.33333	3	1.28571	0.36257	≥ 0.05	-
A0A023FM21	Putative rna methylase involved in rrna processing (Fragment)	Amblyomma cajennense PE	371	41.8528	9.81787	1	2	7	8	0	0	0	0	3.38547	10.24	3	3	0	12.94	3	3	0	0	0	0	0	0	0	0	0	8.36	2	2	2	0.666667	0.333333	-1.58496	≥ 0.05	F:methyltransferase activity; P:methylation
A0A023FM26	Putative glycerol-3-phosphate dehydrogenase (Fragment)	Amblyomma cajennense PE	569	63.8023	7.81104	2	2	23	32	0	12.65	5	5	0	0	0	0	0	11.95	4	4	0	11.95	5	5	0	0	0	0	0	18.63	9	9	3	4.66667	1.55556	0.63743	≥ 0.05	P:oxidation-reduction process; C:glycerol-3-phosphate dehydrogenase complex; F:oxidoreductase activity; F:calcium ion binding; F:glycerol-3-phosphate dehydrogenase activity; P:glycerol-3-phosphate metabolic process
A0A023FM29	Putative chaperonin subunit ixodes scapularis chaperonin subunit	Amblyomma cajennense PE	573	61.0462	5.42725	3	2	26	154	18.8104	16.06	7	15	19.1632	32.11	14	25	17.3485	24.78	10	13	44.4783	26.18	11	23	32.9475	29.14	11	28	38.0015	32.11	15	21	17.6667	24	1.35849	0.442005	≥ 0.05	F:ATP binding; C:cytoplasm; P:protein folding; F:nucleotide binding; P:protein refolding
A0A023FM33	Putative degradation arginine-rich protein for mis-folding	Amblyomma cajennense PE	180	20.4305	7.54736	2	1	4	4	0	0	0	0	0	0	0	0	0	0	0	0	0	0	0	0	0	0	0	0	0	26.11	3	3	0	1	#DIV/0!	#DIV/0!	≥ 0.05	-
A0A023FM36	Putative eukaryotic translation initiation factor 2a (Fragment)	Amblyomma cajennense PE	580	65.0187	8.646	1	1	5	6	0	0	0	0	1.81756	1.9	1	1	0	10	3	4	0	0	0	0	0	0	0	0	0	0	0	0	1.66667	0	0	#NUM!	≥ 0.05	P:translational initiation; F:translation initiation factor activity
A0A023FM42	Putative regulator of the ubiquitin pathway	Amblyomma cajennense PE	600	66.7165	4.77979	1	1	12	22	1.77532	17	6	7	0	0	0	0	0	8.33	3	3	0	3.83	2	3	0	1.67	1	1	0	8.83	5	5	3.33333	3	0.9	-0.152003	≥ 0.05	-
A0A023FM44	Uncharacterized protein (Fragment)	Amblyomma cajennense PE	378	41.3163	7.40088	2	1	16	22	0	0	0	0	0	6.61	2	2	0	0	0	0	0	0	0	0	2.00998	16.67	6	6	0	12.17	4	5	0.666667	3.66667	5.5	2.45943	≥ 0.05	P:proteolysis; C:cytoplasm; P:protein metabolic process; F:metalloexopeptidase activity; F:aminopeptidase activity; F:manganese ion binding; C:intracellular
A0A023FM46	Putative vacuolar h+-atpase v0 sector subunit a (Fragment)	Amblyomma cajennense PE	379	43.2361	8.20654	2	2	10	11	0	0	0	0	0	0	0	0	1.86094	14.51	4	4	0	0	0	0	0	0	0	0	1.20612	5.01	2	3	1.33333	1	0.75	-0.415037	≥ 0.05	F:hydrogen ion transmembrane transporter activity; C:proton-transporting V-type ATPase, V0 domain; C:integral component of membrane; C:membrane; P:proton transport; P:ATP hydrolysis coupled proton transport; P:ion transport; P:transport
A0A023FM52	Putative cytochrome p450 cyp2 subfamily protein (Fragment)	Amblyomma cajennense PE	382	44.165	8.80713	2	2	9	18	0	0	0	0	0	0	0	0	1.64279	12.3	4	5	1.84186	12.83	6	8	0	0	0	0	1.60646	4.71	2	5	1.66667	4.33333	2.6	1.37851	≥ 0.05	P:oxidation-reduction process; F:oxidoreductase activity, acting on paired donors, with incorporation or reduction of molecular oxygen; F:heme binding; F:iron ion binding
A0A023FM54	Putative gtp-specific succinyl-coa synthetase beta subunit	Amblyomma cajennense PE	383	40.9714	5.24951	4	2	11	17	0	0	0	0	1.66296	13.58	6	6	1.62971	4.44	2	2	1.60172	3.92	2	3	0	0	0	0	0	4.7	2	3	2.66667	2	0.75	-0.415037	≥ 0.05	F:ATP binding; F:ligase activity; P:metabolic process; F:nucleotide binding; F:catalytic activity
A0A023FM56	Putative bromodomain-containing protein (Fragment)	Amblyomma cajennense PE	385	41.8237	10.8726	1	1	10	12	0	6.23	2	2	0	0	0	0	0	18.7	6	6	0	8.83	4	4	0	0	0	0	0	0	0	0	2.66667	1.33333	0.5	-1	≥ 0.05	-
A0A023FM57	Putative tick serpins 14	Amblyomma cajennense PE	402	44.6392	7.54736	1	2	17	33	1.76415	9.45	3	3	0	9.45	3	5	1.7811	17.66	5	5	3.23206	13.43	5	5	2.06432	23.13	9	9	3.28805	6.97	2	3	4.33333	5.66667	1.30769	0.387023	≥ 0.05	C:extracellular space
A0A023FM61	Putative integrator complex subunit ixodes scapularis integrator complex subunit (Fragment)	Amblyomma cajennense PE	623	71.1053	5.45264	1	1	20	24	0	2.25	1	2	0	2.57	1	1	1.68962	12.84	6	7	1.68941	6.26	2	2	1.67016	7.54	3	3	1.76089	15.57	7	7	3.33333	4	1.2	0.263034	≥ 0.05	-
A0A023FM67	Ubiquitin carboxyl-terminal hydrolase	Amblyomma cajennense PE	630	67.7891	7.35693	2	4	16	23	0	0	0	0	1.61639	4.29	3	3	0	9.84	4	4	2.26444	13.97	4	5	0	0	0	0	0	11.11	4	7	2.33333	4	1.71429	0.777608	≥ 0.05	F:metal ion binding; P:proteolysis; F:hydrolase activity; F:cysteine-type peptidase activity; F:zinc ion binding; F:peptidase activity; F:ubiquitinyl hydrolase activity; P:ubiquitin-dependent protein catabolic process
A0A023FM68	Uncharacterized protein	Amblyomma cajennense PE	393	42.1241	11.1069	1	2	11	18	0	0	0	0	1.63996	17.56	5	6	0	17.56	4	4	0	10.18	2	2	0	0	0	0	0	0	0	0	3.33333	0.666667	0.2	-2.32193	≥ 0.05	-
A0A023FM70	Putative heat shock protein (Fragment)	Amblyomma cajennense PE	651	71.5779	5.66846	5	2	45	346	102.808	48.54	28	50	29.3967	13.67	8	11	85.9031	38.56	21	43	126.97	44.09	24	57	94.4101	36.25	23	48	105.766	37.63	27	51	34.6667	52	1.5	0.584963	≥ 0.05	F:ATP binding; F:nucleotide binding
A0A023FM72	Putative multidrug resistance-associated protein/mitoxantrone resistance protein abc superfamily	Amblyomma cajennense PE	451	49.9632	8.70459	1	4	12	31	0	8.43	4	5	0	0	0	0	0	13.75	4	4	1.68542	4.66	3	4	0	9.31	3	3	0	6.21	4	5	3	4	1.33333	0.415037	≥ 0.05	F:ATPase activity; F:ATP binding; C:integral component of membrane; P:metabolic process; F:nucleotide binding; F:ATPase activity, coupled to transmembrane movement of substances; P:transmembrane transport; P:transport
A0A023FM79	Putative serine carboxypeptidase lysosomal cathepsin a	Amblyomma cajennense PE	494	55.119	6.34131	3	1	3	3	0	0	0	0	0	0	0	0	0	0	0	0	0	0	0	0	1.79452	5.26	2	2	0	0	0	0	0	0.666667	#DIV/0!	#DIV/0!	≥ 0.05	P:proteolysis; F:carboxypeptidase activity; F:serine-type carboxypeptidase activity
A0A023FM82	Putative polyadenylate-binding protein rrm superfamily	Amblyomma cajennense PE	683	75.1211	9.43701	4	2	27	39	0	7.03	4	4	0	0	0	0	4.13505	16.69	8	8	6.01471	6.73	4	4	2.05711	4.25	3	3	1.81361	10.25	7	7	4	4.66667	1.16667	0.222392	≥ 0.05	F:RNA binding; F:nucleic acid binding; C:cytoplasm; F:nucleotide binding
A0A023FM86	Putative tick metalloprotease 1 (Fragment)	Amblyomma cajennense PE	506	58.1318	5.98584	2	2	9	10	0	5.34	2	2	0	0	0	0	0	0	0	0	0	7.31	2	2	1.60347	4.94	2	2	0	6.72	2	2	0.666667	2	3	1.58496	≥ 0.05	P:proteolysis; F:metallopeptidase activity; F:peptidase activity; F:metalloendopeptidase activity
A0A023FM91	Putative aldehyde dehydrogenase (Fragment)	Amblyomma cajennense PE	543	58.3919	7.31299	3	3	15	26	1.82464	6.63	3	3	0	9.58	3	4	1.64493	8.66	4	4	0	3.31	1	1	4.21628	13.26	6	6	0	7.18	3	3	3.66667	3.33333	0.909091	-0.137504	≥ 0.05	P:oxidation-reduction process; F:oxidoreductase activity; F:oxidoreductase activity, acting on the aldehyde or oxo group of donors, NAD or NADP as acceptor; P:metabolic process
A0A023FM92	Putative leucine-rich ppr motif-containing protein mitochondrial (Fragment)	Amblyomma cajennense PE	716	79.576	6.07471	3	10	24	41	1.94124	4.47	2	2	1.72908	7.96	4	4	1.61736	13.41	6	6	1.82589	13.41	9	9	1.89	8.66	5	5	1.60768	5.45	3	3	4	5.66667	1.41667	0.5025	≥ 0.05	-
A0A023FM96	Putative hexosaminid	Amblyomma cajennense PE	589	67.4189	7.41553	1	7	16	21	1.63227	1.19	1	1	1.60006	8.49	3	3	0	10.53	4	4	2.09546	1.87	1	1	3.60713	10.02	6	6	0	5.26	2	2	2.66667	3	1.125	0.169925	≥ 0.05	F:hydrolase activity, hydrolyzing O-glycosyl compounds; P:carbohydrate metabolic process
A0A023FMA0	Putative nostrin (Fragment)	Amblyomma cajennense PE	427	48.3431	9.21729	1	4	9	10	0	0	0	0	0	5.62	2	2	2.02951	4.68	2	2	0	3.51	1	1	0	0	0	0	0	8.9	3	3	1.33333	1.33333	1	0	≥ 0.05	P:regulation of nitric-oxide synthase activity
A0A023FMA4	Putative conserved oligomeric golgi complex subunit 7 (Fragment)	Amblyomma cajennense PE	751	84.5958	5.12256	1	2	11	13	0	0	0	0	0	5.33	2	2	0	8.92	4	4	0	3.99	2	2	0	2.66	2	2	0	0	0	0	2	1.33333	0.666667	-0.584963	≥ 0.05	P:intracellular protein transport; C:Golgi transport complex
A0A023FMA7	Putative conserved secreted protein	Amblyomma cajennense PE	614	68.0199	5.8335	1	1	8	20	2.02279	4.56	3	3	0	0	0	0	2.21627	6.84	3	3	2.01433	2.44	2	2	0	9.45	5	5	0	9.28	4	4	2	3.66667	1.83333	0.874469	≥ 0.05	P:oxidation-reduction process; F:oxidoreductase activity, acting on CH-OH group of donors; F:flavin adenine dinucleotide binding
A0A023FMA8	Putative na+-independent cl/hco3 exchanger ae1 (Fragment)	Amblyomma cajennense PE	761	84.3526	6.13818	1	2	12	19	1.66354	6.96	3	3	0	10.38	7	9	0	2.89	2	2	0	0	0	0	0	3.55	3	3	0	2.89	2	2	4.66667	1.66667	0.357143	-1.48543	≥ 0.05	P:anion transport; F:transporter activity; F:anion transmembrane transporter activity; C:integral component of membrane; C:membrane; F:inorganic anion exchanger activity; P:ion transport; P:transport; P:anion transmembrane transport
A0A023FMA9	Putative glutamine phosphoribosylpyrophosphate amidotransferase (Fragment)	Amblyomma cajennense PE	408	44.5145	6.68311	1	1	4	10	3.80866	6.62	3	4	1.60234	4.66	2	2	0	0	0	0	1.68534	1.96	1	1	0	4.66	1	1	0	10.05	2	2	2	1.33333	0.666667	-0.584963	≥ 0.05	P:nucleoside metabolic process; F:transferase activity; P:purine nucleobase biosynthetic process; F:amidophosphoribosyltransferase activity
A0A023FMB0	Putative atp-citrate lyase (Fragment)	Amblyomma cajennense PE	430	47.1552	6.53662	1	1	11	13	0	6.51	2	2	0	0	0	0	1.63901	14.42	6	6	0	0	0	0	0	0	0	0	0	0	0	0	2.66667	0	0	#NUM!	≥ 0.05	F:ATP binding; P:metabolic process; F:lyase activity
A0A023FMB2	Putative tgc transglutaminase/protease-like domain-containing protein involved in cytokinesis (Fragment)	Amblyomma cajennense PE	410	47.1216	6.354	1	2	10	16	0	7.07	3	3	0	5.12	2	2	0	0	0	0	0	5.37	2	2	0	0	0	0	0	7.07	3	4	1.66667	2	1.2	0.263034	≥ 0.05	P:proteolysis; F:peptidase activity
A0A023FMB8	Putative rna polymer (Fragment)	Amblyomma cajennense PE	779	89.277	7.6792	1	3	18	25	0	0	0	0	0	5.65	4	8	0	0	0	0	0	4.88	3	3	0	0	0	0	1.86063	10.01	8	8	2.66667	3.66667	1.375	0.459432	≥ 0.05	F:ATP binding; F:hydrolase activity; P:nucleotide-excision repair; P:DNA duplex unwinding; F:ATP-dependent DNA helicase activity; F:DNA binding
A0A023FMC6	Putative dim gamma-tubulin 1	Amblyomma cajennense PE	437	48.9752	7.79639	1	3	12	14	0	0	0	0	0	0	0	0	0	2.97	1	1	0	14.42	5	5	0	0	0	0	0	3.89	3	3	0.333333	2.66667	8	3	≥ 0.05	-
A0A023FMC7	Putative nuclear receptor interaction protein	Amblyomma cajennense PE	823	89.6169	5.98584	1	1	5	6	0	0	0	0	0	0	0	0	0	0	0	0	0	0	0	0	0	0	0	0	2.26033	8.75	4	4	0	1.33333	#DIV/0!	#DIV/0!	≥ 0.05	-
A0A023FMC8	Putative valyl-trna synthetase (Fragment)	Amblyomma cajennense PE	439	48.681	7.79639	1	4	6	8	0	0	0	0	0	8.2	3	4	0	0	0	0	0	0	0	0	0	0	0	0	0	2.51	1	1	1.33333	0.333333	0.25	-2	≥ 0.05	F:ATP binding; F:aminoacyl-tRNA ligase activity; F:nucleotide binding; P:tRNA aminoacylation for protein translation
A0A023FMD0	Uncharacterized protein (Fragment)	Amblyomma cajennense PE	842	92.2052	6.02393	1	1	29	42	3.3634	6.41	5	5	1.85135	6.77	5	5	2.02556	7.13	5	5	0	8.08	5	5	0	5.58	4	4	1.85564	7.72	6	6	5	5	1	0	≥ 0.05	F:ligase activity, forming aminoacyl-tRNA and related compounds; F:nucleic acid binding; F:ATP binding; F:alanine-tRNA ligase activity; C:cytoplasm; P:tRNA aminoacylation; F:nucleotide binding; P:alanyl-tRNA aminoacylation
A0A023FMD2	Putative macrophage migration inhibitory factor	Amblyomma cajennense PE	108	11.9873	7.88428	2	1	3	4	0	0	0	0	0	0	0	0	0	0	0	0	0	0	0	0	0	12.04	2	2	0	12.04	1	1	0	1	#DIV/0!	#DIV/0!	≥ 0.05	-
A0A023FMD6	Putative multidrug resistance-associated protein/mitoxantrone resistance protein abc superfamily (Fragment)	Amblyomma cajennense PE	415	46.0988	7.94287	1	1	6	10	0	0	0	0	0	0	0	0	1.6494	6.99	2	3	0	0	0	0	0	0	0	0	0	15.18	4	4	1	1.33333	1.33333	0.415037	≥ 0.05	F:ATPase activity; F:ATP binding; C:integral component of membrane; P:metabolic process; F:ATPase activity, coupled to transmembrane movement of substances; P:transmembrane transport; P:transport
A0A023FMD8	Putative multidrug resistance-associated protein/mitoxantrone resistance protein abc superfamily (Fragment)	Amblyomma cajennense PE	871	95.7947	5.63037	1	10	17	35	3.78367	8.84	6	6	0	8.38	6	6	0	8.73	5	5	0	0	0	0	0	4.71	4	5	0	5.74	5	5	5.66667	3.33333	0.588235	-0.765535	≥ 0.05	F:ATPase activity; F:ATP binding; C:integral component of membrane; P:metabolic process; F:nucleotide binding; F:ATPase activity, coupled to transmembrane movement of substances; P:transmembrane transport; P:transport
A0A023FMD9	Putative beta tubulin	Amblyomma cajennense PE	445	49.933	4.89404	1	3	23	385	155.047	50.56	17	57	111.957	53.03	17	42	120.26	55.06	16	54	125.837	35.96	12	48	110.086	48.76	17	48	120.309	38.2	14	49	51	48.3333	0.947712	-0.0774788	≥ 0.05	P:microtubule-based process; P:protein polymerization; C:microtubule; F:nucleotide binding; C:cytoplasm; F:GTP binding; C:protein complex; F:structural constituent of cytoskeleton; P:metabolic process; F:GTPase activity; C:cytoskeleton
A0A023FME1	Putative gtpase rab30 small g protein superfamily (Fragment)	Amblyomma cajennense PE	136	15.549	5.57959	3	2	7	15	2.47482	8.09	1	1	1.79811	19.12	2	3	2.39027	18.38	2	2	3.22269	19.12	3	3	5.85267	8.09	1	2	0	0	0	0	2	1.66667	0.833333	-0.263034	≥ 0.05	F:GTP binding; P:small GTPase mediated signal transduction; F:nucleotide binding; C:intracellular
A0A023FME3	Putative m13 family peptidase (Fragment)	Amblyomma cajennense PE	446	51.1984	9.17334	1	4	7	13	0	0	0	0	0	0	0	0	0	10.54	4	4	0	9.19	3	3	0	7.85	2	3	0	2.47	1	1	1.33333	2.33333	1.75	0.807355	≥ 0.05	P:proteolysis; F:metallopeptidase activity; F:metalloendopeptidase activity
A0A023FMF2	Putative kinesin smy1 subfamily protein	Amblyomma cajennense PE	986	111.027	6.40479	4	3	43	66	5.52692	17.34	12	12	1.73789	13.49	11	11	2.15687	11.76	7	7	1.79899	6.29	6	7	1.64781	10.34	9	9	0	5.27	4	4	10	6.66667	0.666667	-0.584963	≥ 0.05	F:ATP binding; P:metabolic process; F:nucleotide binding; F:microtubule motor activity; F:microtubule binding; P:microtubule-based movement; C:microtubule
A0A023FMF4	Putative translation factor	Amblyomma cajennense PE	419	47.7189	6.81494	4	1	8	12	0	0	0	0	0	0	0	0	0	5.73	2	2	1.61898	4.3	2	2	0	8.11	3	3	0	0	0	0	0.666667	1.66667	2.5	1.32193	≥ 0.05	-
A0A023FMF8	Putative e3 ubiquitin ligase (Fragment)	Amblyomma cajennense PE	420	47.0512	7.7085	1	1	6	11	0	0	0	0	0	10	4	4	0	0	0	0	0	10.95	4	5	0	0	0	0	0	5	2	2	1.33333	2.33333	1.75	0.807355	≥ 0.05	F:metal ion binding; F:ligase activity; P:metabolic process; F:zinc ion binding
A0A023FMG6	Putative c11orf2 protein (Fragment)	Amblyomma cajennense PE	460	52.0148	6.75635	1	1	4	4	0	0	0	0	0	0	0	0	0	5.87	2	2	0	5.43	2	2	0	0	0	0	0	0	0	0	0.666667	0.666667	1	0	≥ 0.05	-
A0A023FMH3	Putative kraken	Amblyomma cajennense PE	350	39.4802	8.79248	1	8	13	18	0	13.43	4	4	0	0	0	0	0	17.43	5	5	0	0	0	0	0	0	0	0	0	0	0	0	3	0	0	#NUM!	≥ 0.05	-
A0A023FMH4	Uncharacterized protein	Amblyomma cajennense PE	467	53.5314	4.90674	2	1	12	27	1.23831	7.28	4	4	0	6.42	3	3	0	0	0	0	3.18038	8.57	4	5	0	9.85	4	4	3.045	8.57	3	3	2.33333	4	1.71429	0.777608	≥ 0.05	-
A0A023FMH5	Putative actin-related protein arp2/3 complex subunit arp2 (Fragment)	Amblyomma cajennense PE	415	47.3456	7.06396	1	1	16	37	0	0	0	0	6.95341	17.35	6	9	0	0	0	0	6.60702	9.64	5	6	0	0	0	0	4.96183	20.24	8	9	3	5	1.66667	0.736966	≥ 0.05	C:Arp2/3 protein complex; P:actin filament organization; F:ATP binding; C:cytoskeleton; P:Arp2/3 complex-mediated actin nucleation
A0A023FMH6	Putative insulin receptor substrate-1 pediculus us corporis insulin receptor substrate-1 (Fragment)	Amblyomma cajennense PE	469	51.8824	8.22119	1	3	8	13	0	4.9	2	2	0	0	0	0	0	0	0	0	0	7.89	2	2	0	5.33	3	3	0	6.82	2	2	0.666667	2.33333	3.5	1.80735	≥ 0.05	F:insulin receptor binding
A0A023FMI5	Putative vitellogenin-2 (Fragment)	Amblyomma cajennense PE	828	94.5221	6.31592	1	4	20	36	0	4.23	3	3	2.16491	5.31	4	5	3.45202	8.33	5	6	0	8.09	5	5	6.38784	11.84	6	7	1.65265	8.94	6	6	4.66667	6	1.28571	0.36257	≥ 0.05	P:lipid transport; F:lipid transporter activity
A0A023FMJ0	Putative pattern-formation protein/guanine nucleotide exchange factor	Amblyomma cajennense PE	1273	139.989	6.43018	2	2	16	31	0	3.46	3	5	0	5.42	5	6	0	4.95	5	5	0	4.71	4	4	1.72337	3.06	3	4	0	4.01	4	4	5.33333	4	0.75	-0.415037	≥ 0.05	P:regulation of ARF protein signal transduction; F:ARF guanyl-nucleotide exchange factor activity; P:positive regulation of GTPase activity
A0A023FMJ2	Putative atp-dependent rna helicase (Fragment)	Amblyomma cajennense PE	487	54.1313	9.46631	2	1	15	17	0	6.98	3	4	1.60914	6.98	2	2	0	0	0	0	0	18.69	6	6	0	9.65	3	3	0	0	0	0	2	3	1.5	0.584963	≥ 0.05	F:helicase activity; F:nucleic acid binding; F:ATP binding; F:hydrolase activity; P:metabolic process; F:nucleotide binding
A0A023FMK0	Aspartate aminotransferase	Amblyomma cajennense PE	426	47.134	9.01221	1	2	15	23	4.13833	6.81	2	2	5.78811	22.77	8	8	0	5.63	2	2	0	7.28	3	3	4.80522	14.32	4	4	2.82624	3.52	1	1	4	2.66667	0.666667	-0.584963	≥ 0.05	P:biosynthetic process; P:cellular amino acid metabolic process; F:transferase activity; F:L-aspartate:2-oxoglutarate aminotransferase activity; F:catalytic activity; F:L-phenylalanine:2-oxoglutarate aminotransferase activity; F:pyridoxal phosphate binding; F:transaminase activity
A0A023FML9	Putative fumarase	Amblyomma cajennense PE	501	53.8909	8.35303	1	1	10	13	1.66256	7.78	2	2	0	0	0	0	0	8.78	3	3	0	0	0	0	1.73479	3.79	2	2	0	7.39	3	3	1.66667	1.66667	1	0	≥ 0.05	C:tricarboxylic acid cycle enzyme complex; F:fumarate hydratase activity; P:tricarboxylic acid cycle; F:catalytic activity; P:fumarate metabolic process; F:lyase activity
A0A023FMM1	Putative succinate-ubiquinone reductase cytochrome b small subunit	Amblyomma cajennense PE	163	17.7555	9.67139	3	1	3	3	0	14.72	2	2	0	0	0	0	0	0	0	0	0	0	0	0	1.97599	7.36	1	1	0	0	0	0	0.666667	0.333333	0.5	-1	≥ 0.05	C:mitochondrial envelope; C:integral component of membrane
A0A023FMP2	Putative prohibitin-related membrane protease subunit	Amblyomma cajennense PE	363	41.217	7.23975	2	6	14	29	2.68231	10.47	3	3	6.74693	14.05	5	6	1.99801	6.89	2	2	4.03207	9.37	3	3	1.62592	13.22	4	4	1.68625	9.64	3	3	3.66667	3.33333	0.909091	-0.137504	≥ 0.05	P:proteolysis; F:peptidase activity
A0A023FMP3	Putative enoyl-coa isomerase (Fragment)	Amblyomma cajennense PE	191	20.884	9.75928	1	4	10	17	0	24.08	3	3	0	0	0	0	0	0	0	0	0	22.51	5	6	0	15.18	2	2	0	19.37	3	4	1	4	4	2	≥ 0.05	P:metabolic process; F:catalytic activity; F:isomerase activity
A0A023FMP6	Succinyl-CoA:3-ketoacid-coenzyme A transferase	Amblyomma cajennense PE	513	55.3017	8.01611	3	2	17	21	0	22.22	7	7	0	7.02	3	3	0	0	0	0	0	13.06	6	6	0	0	0	0	0	13.26	4	5	3.33333	3.66667	1.1	0.137504	≥ 0.05	C:mitochondrion; P:ketone body catabolic process; F:transferase activity; F:3-oxoacid CoA-transferase activity; P:metabolic process; F:CoA-transferase activity
A0A023FMP9	Putative dynactin subunit p25 (Fragment)	Amblyomma cajennense PE	210	22.8426	7.72314	4	1	3	4	0	0	0	0	0	8.57	2	2	0	0	0	0	0	0	0	0	0	0	0	0	0	0	0	0	0.666667	0	0	#NUM!	≥ 0.05	-
A0A023FMR1	Putative equilibrative nucleoside transporter protein	Amblyomma cajennense PE	527	56.5972	6.46826	2	2	4	4	0	0	0	0	0	0	0	0	0	17.65	4	4	0	0	0	0	0	0	0	0	0	0	0	0	1.33333	0	0	#NUM!	≥ 0.05	-
A0A023FMR9	Uncharacterized protein (Fragment)	Amblyomma cajennense PE	197	22.7777	9.27588	2	1	7	17	1.94939	9.14	2	2	0	0	0	0	2.00524	20.81	3	4	0	0	0	0	0	18.27	3	6	2.77563	23.35	3	5	2	3.66667	1.83333	0.874469	≥ 0.05	P:negative regulation of endopeptidase activity; F:serine-type endopeptidase inhibitor activity
A0A023FMS0	Putative lipocalin-3 1 (Fragment)	Amblyomma cajennense PE	192	22.6812	9.29053	1	2	9	13	0	16.67	2	2	0	0	0	0	1.61937	10.42	2	2	0	10.42	2	2	0	0	0	0	1.88579	25.52	4	4	1.33333	2	1.5	0.584963	≥ 0.05	-
A0A023FMS2	Putative ribosome bioproteinsis protein	Amblyomma cajennense PE	535	59.6453	9.08545	3	4	19	35	0	8.22	5	5	3.53117	12.15	5	6	2.36487	21.87	9	14	0	0	0	0	0	7.29	3	3	1.72676	12.34	5	5	8.33333	2.66667	0.32	-1.64386	≥ 0.05	-
A0A023FMT5	Uncharacterized protein (Fragment)	Amblyomma cajennense PE	547	62.4672	5.33838	1	6	14	27	0	0	0	0	0	9.69	5	5	1.62711	14.81	6	6	1.77541	8.23	4	6	0	0	0	0	0	6.22	3	4	3.66667	3.33333	0.909091	-0.137504	≥ 0.05	-
A0A023FMU6	Putative cytochrome oxidase subunit viic	Amblyomma cajennense PE	75	8.26335	11.7222	2	1	2	2	0	0	0	0	0	30.67	2	2	0	0	0	0	0	0	0	0	0	0	0	0	0	0	0	0	0.666667	0	0	#NUM!	≥ 0.05	P:hydrogen ion transmembrane transport; F:cytochrome-c oxidase activity
A0A023FMW1	Putative monocarboxylate transporter ixodes scapularis monocarboxylate transporter (Fragment)	Amblyomma cajennense PE	560	60.5922	5.021	1	1	6	8	0	5.54	2	2	0	0	0	0	0	0	0	0	0	4.82	2	2	0	0	0	0	0	0	0	0	0.666667	0.666667	1	0	≥ 0.05	C:integral component of membrane; P:transmembrane transport
A0A023FMW3	Putative ubiquinol-cytochrome c reduct (Fragment)	Amblyomma cajennense PE	93	10.5479	5.2876	1	1	3	4	0	0	0	0	0	0	0	0	0	0	0	0	0	0	0	0	1.83034	19.35	2	2	1.61489	15.05	1	1	0	1	#DIV/0!	#DIV/0!	≥ 0.05	F:ubiquinol-cytochrome-c reductase activity; P:hydrogen ion transmembrane transport; C:mitochondrion; P:mitochondrial electron transport, ubiquinol to cytochrome c
A0A023FMW4	Putative dolichyl-diphosphooligosaccharide--protein glycosyltransferase subunit 2 (Fragment)	Amblyomma cajennense PE	435	47.9058	9.43701	1	1	8	16	0	0	0	0	0	0	0	0	1.60397	10.11	3	3	4.70734	6.44	3	3	1.98123	5.06	3	3	2.79991	6.9	2	2	1	2.66667	2.66667	1.41504	≥ 0.05	P:protein N-linked glycosylation; C:oligosaccharyltransferase complex; F:transferase activity; C:integral component of membrane
A0A023FMX1	Putative lim domain and actin-binding protein 1 (Fragment)	Amblyomma cajennense PE	567	64.6611	5.74463	1	3	24	35	0	6.88	3	4	0	4.76	2	2	2.49416	11.82	7	7	1.747	10.76	5	5	1.88053	12.87	5	5	0	15.7	6	6	4.33333	5.33333	1.23077	0.29956	≥ 0.05	F:metal ion binding; F:zinc ion binding
A0A023FMX8	Putative carnitine o-acyltransferase cpti (Fragment)	Amblyomma cajennense PE	569	65.3027	7.69385	1	1	5	6	0	0	0	0	0	0	0	0	0	12.83	5	6	0	0	0	0	0	0	0	0	0	0	0	0	2	0	0	#NUM!	≥ 0.05	F:transferase activity; P:metabolic process; F:transferase activity, transferring acyl groups
A0A023FMY0	Putative vacuolar sorting protein	Amblyomma cajennense PE	440	49.3755	7.88428	1	3	15	19	0	0	0	0	0	7.73	3	3	0	8.86	2	2	0	6.59	2	2	3.27757	10.23	6	6	3.74993	10.23	4	4	1.66667	4	2.4	1.26303	≥ 0.05	F:ATP binding; F:nucleotide binding
A0A023FMY2	Putative secreted protein	Amblyomma cajennense PE	267	29.81	5.0083	4	1	4	7	0	7.87	1	1	0	11.99	2	2	0	0	0	0	0	6.74	1	1	0	0	0	0	0	0	0	0	1	0.333333	0.333333	-1.58496	≥ 0.05	-
A0A023FMY7	Putative map kinase-interacting kinase	Amblyomma cajennense PE	443	49.1077	7.02002	3	3	8	13	0	6.09	2	2	0	9.71	2	2	0	0	0	0	2.04604	9.71	2	2	0	6.32	2	2	2.2346	5.64	2	2	1.33333	2	1.5	0.584963	≥ 0.05	F:kinase activity; F:ATP binding; F:protein kinase activity; P:phosphorylation; P:protein phosphorylation
A0A023FMZ5	Putative 26s proteasome regulatory complex subunit (Fragment)	Amblyomma cajennense PE	446	51.5766	7.35693	1	4	23	39	1.71638	10.54	5	5	1.79698	12.78	6	6	3.61219	10.99	4	4	2.16728	12.78	5	6	1.80285	15.7	6	6	4.34688	9.42	3	5	5	5.66667	1.13333	0.180572	≥ 0.05	C:proteasome complex
A0A023FN08	NADH dehydrogenase [ubiquinone] 1 subunit C2	Amblyomma cajennense PE	124	14.4394	8.82178	2	1	3	4	0	0	0	0	0	23.39	2	3	0	0	0	0	0	0	0	0	0	17.74	1	1	0	0	0	0	1	0.333333	0.333333	-1.58496	≥ 0.05	F:NADH dehydrogenase (ubiquinone) activity; P:mitochondrial electron transport, NADH to ubiquinone; C:mitochondrial inner membrane
A0A023FN09	Putative proline oxidase (Fragment)	Amblyomma cajennense PE	452	51.632	8.60205	1	4	10	12	0	0	0	0	0	8.19	3	3	0	8.19	3	3	0	0	0	0	0	0	0	0	0	0	0	0	2	0	0	#NUM!	≥ 0.05	P:oxidation-reduction process; F:proline dehydrogenase activity; P:proline catabolic process
A0A023FN14	Putative muscle myosin heavy chain ixodes scapularis muscle myosin heavy chain (Fragment)	Amblyomma cajennense PE	596	65.4348	5.5542	1	1	13	27	0	7.21	3	3	2.2499	13.09	8	8	0	0	0	0	2.30046	3.19	2	2	2.40176	11.07	6	6	0	0	0	0	3.66667	2.66667	0.727273	-0.459432	≥ 0.05	-
A0A023FN21	Putative amino acid transporter ixodes scapularis amino acid transporter	Amblyomma cajennense PE	603	66.2865	5.021	1	3	9	12	0	3.81	1	2	2.51159	7.79	3	3	0	8.29	3	3	1.82064	3.81	3	3	2.16822	3.48	1	1	0	0	0	0	2.66667	1.33333	0.5	-1	≥ 0.05	P:carbohydrate metabolic process; F:cation binding; F:catalytic activity
A0A023FN24	Putative thioredoxin/protein disulfide isomerase (Fragment)	Amblyomma cajennense PE	459	52.6317	4.34814	1	3	8	11	0	6.97	2	2	0	0	0	0	0	0	0	0	0	0	0	0	0	0	0	0	2.12852	12.64	4	4	0.666667	1.33333	2	1	≥ 0.05	P:cell redox homeostasis; P:metabolic process; C:cell; F:isomerase activity
A0A023FN30	Putative rap1-gtpase-activating protein rap1gap (Fragment)	Amblyomma cajennense PE	461	53.4001	7.12256	1	2	8	8	0	11.5	4	4	0	0	0	0	0	5.86	2	2	0	0	0	0	0	0	0	0	0	0	0	0	2	0	0	#NUM!	≥ 0.05	F:GTPase activator activity; P:regulation of small GTPase mediated signal transduction; P:positive regulation of GTPase activity
A0A023FN33	Uncharacterized protein	Amblyomma cajennense PE	130	14.119	5.23682	1	1	2	4	0	0	0	0	0	0	0	0	0	20.77	2	2	0	0	0	0	0	14.62	1	1	0	0	0	0	0.666667	0.333333	0.5	-1	≥ 0.05	C:SMN complex
A0A023FN34	Putative serine protease inhibitor ixodes scapularis serine protease inhibitor (Fragment)	Amblyomma cajennense PE	323	35.3682	5.60498	1	3	11	16	1.62705	10.53	3	3	0	17.34	6	6	1.79496	15.17	3	3	0	6.5	2	2	0	0	0	0	0	0	0	0	4	0.666667	0.166667	-2.58496	≥ 0.05	P:proteolysis; C:extracellular space; F:peptidase activity
A0A023FN44	Putative armadillo repeat-containing protein (Fragment)	Amblyomma cajennense PE	624	69.229	6.91748	2	3	29	64	1.78881	9.29	5	6	1.77458	19.87	9	11	0	17.47	8	9	3.04713	20.83	9	11	1.9029	13.78	6	8	4.38667	13.46	6	9	8.66667	9.33333	1.07692	0.106915	≥ 0.05	-
A0A023FN45	Putative alpha-2-macroglobulin receptor-associated protein	Amblyomma cajennense PE	333	39.1301	7.95752	1	1	5	5	0	0	0	0	0	0	0	0	0	0	0	0	0	14.11	3	3	0	7.51	2	2	0	0	0	0	0	1.66667	#DIV/0!	#DIV/0!	≥ 0.05	F:heparin binding; F:low-density lipoprotein particle receptor binding; C:endoplasmic reticulum
A0A023FN48	Putative polya polymerase (Fragment)	Amblyomma cajennense PE	629	69.9801	8.646	2	8	21	33	0	0	0	0	0	12.72	6	6	0	11.61	5	7	1.56455	14.94	7	7	1.50382	4.61	3	3	1.96087	6.04	3	3	4.33333	4.33333	1	0	≥ 0.05	F:RNA binding; F:nucleotidyltransferase activity; P:RNA 3'-end processing; F:polynucleotide adenylyltransferase activity; P:RNA polyadenylation; C:nucleus
A0A023FN54	Putative titin (Fragment)	Amblyomma cajennense PE	633	70.4834	6.3667	1	1	5	5	0	2.37	1	1	0	0	0	0	1.63187	8.85	4	4	0	0	0	0	0	0	0	0	0	0	0	0	1.66667	0	0	#NUM!	≥ 0.05	-
A0A023FN59	Putative tick kunitz 1	Amblyomma cajennense PE	138	16.0336	7.98682	1	2	5	6	0	15.94	2	2	0	0	0	0	0	0	0	0	0	0	0	0	0	0	0	0	0	0	0	0	0.666667	0	0	#NUM!	≥ 0.05	P:negative regulation of endopeptidase activity; F:serine-type endopeptidase inhibitor activity
A0A023FN61	Putative nuclear matrix protein (Fragment)	Amblyomma cajennense PE	476	53.3496	5.31299	1	2	10	11	0	5.88	1	1	0	2.52	1	1	0	3.57	1	1	2.02485	12.39	3	3	0	5.67	2	2	0	10.71	3	3	1	2.66667	2.66667	1.41504	≥ 0.05	P:signal transduction
A0A023FN69	Putative cytoplasmic dynein intermediate chain	Amblyomma cajennense PE	671	74.2967	5.49072	1	1	8	17	0	6.26	2	2	0	0	0	0	0	8.35	4	4	1.87314	1.49	1	3	1.88322	1.49	1	1	2.16536	1.49	1	4	2	2.66667	1.33333	0.415037	≥ 0.05	C:cytoplasmic dynein complex; P:microtubule-based movement
A0A023FN72	Uncharacterized protein (Fragment)	Amblyomma cajennense PE	144	16.5445	8.6167	1	2	4	5	0	18.75	2	2	0	0	0	0	0	0	0	0	0	0	0	0	0	0	0	0	0	0	0	0	0.666667	0	0	#NUM!	≥ 0.05	P:signal transduction
A0A023FN74	Adenylyl cyclase-associated protein	Amblyomma cajennense PE	480	51.9477	8.23584	1	1	24	69	6.46283	21.67	7	7	1.75086	4.38	2	2	1.88063	12.29	5	5	13.4311	32.08	14	14	6.8645	21.25	9	9	10.4852	25.21	10	10	4.66667	11	2.35714	1.23704	≥ 0.05	F:actin binding; P:cytoskeleton organization; P:cell morphogenesis
A0A023FN75	Putative cactin	Amblyomma cajennense PE	678	80.0106	7.00537	1	3	15	19	1.68706	5.16	3	3	0	0	0	0	1.32792	4.87	3	3	0	12.54	6	6	1.70654	8.11	4	4	1.80503	3.83	2	2	2	4	2	1	≥ 0.05	-
A0A023FN87	Putative exosome 3'-5' exoribonuclease complex subunit pm/scl-100 rrp6 (Fragment)	Amblyomma cajennense PE	689	78.2774	7.40088	1	2	17	21	0	0	0	0	0	0	0	0	1.619	13.79	8	9	0	13.06	6	6	0	0	0	0	0	6.39	4	4	3	3.33333	1.11111	0.152003	≥ 0.05	C:nuclear exosome (RNase complex); P:nucleic acid phosphodiester bond hydrolysis; P:cellular metabolic process; P:RNA processing; F:nucleic acid binding; F:nucleotide binding; F:catalytic activity; C:intracellular; P:nucleobase-containing compound metabolic process; F:3'-5' exonuclease activity
A0A023FN95	Putative dynamin-like 120 kDa protein mitochondrial (Fragment)	Amblyomma cajennense PE	709	81.7558	6.68311	1	1	18	25	0	4.65	3	3	0	0	0	0	2.1563	18.05	12	13	0	0	0	0	0	0	0	0	0	10.44	5	5	5.33333	1.66667	0.3125	-1.67807	≥ 0.05	F:GTP binding; F:GTPase activity; P:metabolic process; F:nucleotide binding
A0A023FN96	Putative cytochrome oxidase complex assembly protein 1	Amblyomma cajennense PE	159	17.9694	9.30518	1	2	6	7	0	0	0	0	0	0	0	0	0	0	0	0	0	10.69	1	1	1.78674	5.03	1	1	0	22.01	3	3	0	1.66667	#DIV/0!	#DIV/0!	≥ 0.05	-
A0A023FN98	Putative plasma membrane glycoprotein cd36 (Fragment)	Amblyomma cajennense PE	370	41.6933	8.70459	3	1	4	6	0	0	0	0	0	0	0	0	0	13.78	3	4	0	0	0	0	0	4.59	2	2	0	0	0	0	1.33333	0.666667	0.5	-1	≥ 0.05	C:integral component of membrane; P:cell adhesion; C:membrane
A0A023FNA0	Putative calpain-b	Amblyomma cajennense PE	715	81.528	5.12256	1	3	16	22	0	3.92	2	2	0	0	0	0	1.62294	6.29	4	4	0	12.45	6	7	0	0	0	0	0	3.22	2	3	2	3.33333	1.66667	0.736966	≥ 0.05	P:proteolysis; F:calcium ion binding; F:hydrolase activity; F:cysteine-type peptidase activity; F:peptidase activity; F:calcium-dependent cysteine-type endopeptidase activity; C:intracellular
A0A023FNA2	Putative signal recognition particle subunit srp54	Amblyomma cajennense PE	502	55.5273	8.66064	4	4	23	39	0	0	0	0	0	13.94	5	6	0	13.55	4	5	0	11.35	5	5	1.66186	20.12	8	10	1.6139	12.15	6	7	3.66667	7.33333	2	1	≥ 0.05	F:7S RNA binding; F:GTP binding; F:GTPase activity; P:SRP-dependent cotranslational protein targeting to membrane; C:signal recognition particle; P:metabolic process
A0A023FNA9	Putative serine carboxypeptidase ixodes scapularis serine carboxypeptidase (Fragment)	Amblyomma cajennense PE	163	18.4167	8.99756	1	1	5	5	0	21.47	3	3	0	12.88	2	2	0	0	0	0	0	0	0	0	0	0	0	0	0	0	0	0	1.66667	0	0	#NUM!	≥ 0.05	P:proteolysis; F:carboxypeptidase activity; F:serine-type carboxypeptidase activity
A0A023FNB6	Putative tigger transposase	Amblyomma cajennense PE	512	56.861	7.02002	1	1	12	25	2.05295	6.05	3	3	1.7984	9.38	4	5	3.8825	7.42	3	4	2.00415	8.01	3	4	1.90857	11.91	4	5	0	8.79	3	3	4	4	1	0	≥ 0.05	F:nucleic acid binding; F:DNA binding
A0A023FNC0	Putative 3-hydroxy-3-methylglutaryl-coa hmg-coa reductase (Fragment)	Amblyomma cajennense PE	753	82.5341	6.65381	2	2	15	22	2.04208	1.99	1	1	0	8.76	5	5	0	0	0	0	0	5.05	2	2	0	5.44	3	3	0	11.69	6	7	2	4	2	1	≥ 0.05	P:oxidation-reduction process; F:hydroxymethylglutaryl-CoA reductase (NADPH) activity; P:coenzyme A metabolic process; C:integral component of membrane; F:oxidoreductase activity, acting on the CH-OH group of donors, NAD or NADP as acceptor; F:coenzyme binding
A0A023FNC3	Putative x globin	Amblyomma cajennense PE	170	18.7429	8.66064	1	1	4	8	1.88373	4.71	1	1	0	17.06	2	2	1.77393	11.18	2	2	0	0	0	0	0	6.47	1	1	1.73482	11.18	2	2	1.66667	1	0.6	-0.736966	≥ 0.05	F:oxygen transporter activity; F:heme binding; C:hemoglobin complex; F:oxygen binding; P:oxygen transport; F:iron ion binding; C:extracellular region; P:transport
A0A023FNC5	Putative hydroxyacyl-coa dehydrogenase/enoyl-coa hydratase	Amblyomma cajennense PE	762	82.9817	8.90967	4	3	28	47	0	6.56	5	5	1.65425	7.87	4	5	0	11.55	6	6	0	11.15	8	8	3.8324	9.32	5	5	0	9.06	5	7	5.33333	6.66667	1.25	0.321928	≥ 0.05	P:fatty acid beta-oxidation; F:enoyl-CoA hydratase activity; P:fatty acid metabolic process; C:mitochondrion; F:3-hydroxyacyl-CoA dehydrogenase activity; P:oxidation-reduction process; F:oxidoreductase activity; F:catalytic activity; C:mitochondrial fatty acid beta-oxidation multienzyme complex; P:metabolic process
A0A023FNC6	Uncharacterized protein (Fragment)	Amblyomma cajennense PE	518	55.9497	8.47021	1	1	14	22	0	21.04	5	5	0	0	0	0	0	6.95	2	2	0	17.76	4	4	2.25404	5.21	2	2	0	14.67	6	6	2.33333	4	1.71429	0.777608	≥ 0.05	F:metal ion binding; P:negative regulation of transcription from RNA polymerase II promoter; P:epidermis morphogenesis; P:compound eye development; P:regulation of gene expression
A0A023FNC9	Putative carnitine o-acyltransferase cpti	Amblyomma cajennense PE	769	87.7809	8.70459	1	2	19	42	4.33455	3.38	3	5	0	8.32	4	4	0	0	0	0	4.29844	13.65	7	9	0	4.81	3	5	4.00449	7.41	5	6	3	6.66667	2.22222	1.152	≥ 0.05	F:transferase activity; P:metabolic process; F:transferase activity, transferring acyl groups
A0A023FND3	ATP synthase subunit beta (Fragment)	Amblyomma cajennense PE	526	56.1894	5.66846	1	3	22	102	29.221	29.47	10	13	24.9831	40.49	14	16	24.9783	24.14	9	14	30.5333	26.81	10	15	22.8997	25.1	9	11	32.9426	22.05	8	12	14.3333	12.6667	0.883721	-0.178337	≥ 0.05	P:ATP synthesis coupled proton transport; C:proton-transporting ATP synthase complex, catalytic core F(1); P:ion transport; P:transport; F:proton-transporting ATP synthase activity, rotational mechanism; P:ATP metabolic process; F:nucleotide binding; F:ATP binding; P:ATP biosynthetic process; P:proton transport; C:proton-transporting two-sector ATPase complex, catalytic domain; F:hydrolase activi…
A0A023FNE1	Putative grp-3 498 glycine rich family (Fragment)	Amblyomma cajennense PE	175	19.436	9.33447	1	2	7	20	2.23493	23.43	3	3	2.66228	16	3	3	2.17997	17.14	2	2	1.95088	12	2	2	1.97103	36	5	6	2.31545	5.71	1	1	2.66667	3	1.125	0.169925	≥ 0.05	F:nucleotide binding
A0A023FNE9	Putative elongation factor 2-like isoform 1	Amblyomma cajennense PE	844	94.4612	6.7124	5	1	35	118	10.7132	20.5	16	16	0	9.6	7	8	13.711	16.94	12	17	19.718	19.43	14	19	22.3944	14.57	11	14	11.0799	14.69	12	13	13.6667	15.3333	1.12195	0.16601	≥ 0.05	P:translational elongation; F:GTP binding; F:translation elongation factor activity; F:GTPase activity; F:nucleotide binding
A0A023FNF4	Putative mucin 68d (Fragment)	Amblyomma cajennense PE	861	92.542	5.5415	1	3	19	34	0	7.67	4	4	1.78474	12.89	9	10	0	5.34	3	3	2.15834	10.34	7	8	0	0	0	0	1.84461	5.46	4	4	5.66667	4	0.705882	-0.5025	≥ 0.05	-
A0A023FNG0	Putative o-linked n-acetylglucosamine transferase ogt (Fragment)	Amblyomma cajennense PE	889	99.02	7.1958	4	1	14	19	0	6.41	3	3	1.66137	3.37	2	2	0	6.41	3	3	1.64373	7.99	7	8	0	0	0	0	0	4.27	3	3	2.66667	3.66667	1.375	0.459432	≥ 0.05	F:transferase activity; P:metabolic process
A0A023FNG7	Phosphorylase (Fragment)	Amblyomma cajennense PE	548	62.5444	7.1958	1	1	15	21	0	17.88	5	5	0	0	0	0	0	8.21	3	3	0	0	0	0	0	0	0	0	2.03907	12.77	6	6	2.66667	2	0.75	-0.415037	≥ 0.05	F:phosphorylase activity; F:transferase activity; P:carbohydrate metabolic process; F:pyridoxal phosphate binding; F:glycogen phosphorylase activity; F:transferase activity, transferring glycosyl groups
A0A023FNG8	Putative scp gapr-1 like: scp-like extracellular protein (Fragment)	Amblyomma cajennense PE	187	20.6422	9.78857	1	1	3	8	0	7.49	2	2	0	0	0	0	0	0	0	0	1.81779	6.95	2	3	1.79849	4.28	1	1	0	0	0	0	0.666667	1.33333	2	1	≥ 0.05	-
A0A023FNH1	Putative vigilin (Fragment)	Amblyomma cajennense PE	974	109.407	8.104	2	9	33	49	3.79487	13.55	11	12	0	6.98	6	6	0	0	0	0	7.31008	14.78	10	11	1.90957	8.42	6	6	5.93682	12.42	9	9	6	8.66667	1.44444	0.530515	≥ 0.05	F:RNA binding; F:nucleic acid binding
A0A023FNH4	Uncharacterized protein (Fragment)	Amblyomma cajennense PE	503	54.8843	6.27783	1	2	8	14	0	5.77	2	2	1.84082	5.37	2	2	0	0	0	0	0	6.76	2	2	2.13646	11.53	3	3	0	0	0	0	1.33333	1.66667	1.25	0.321928	≥ 0.05	C:cytoplasm; C:integral component of membrane; P:transport; F:transporter activity
A0A023FNI5	Putative ferm domain protein ehm2	Amblyomma cajennense PE	559	64.1635	6.53662	1	2	14	30	3.95844	6.08	4	4	0	0	0	0	2.04122	8.05	4	4	2.09092	5.55	3	4	2.27649	1.61	1	2	3.97228	5.01	4	5	2.66667	3.66667	1.375	0.459432	≥ 0.05	C:cytoplasm; C:extrinsic component of membrane; C:cytoskeleton; F:cytoskeletal protein binding
A0A023FNI7	Eukaryotic translation initiation factor 3 subunit A	Amblyomma cajennense PE	1105	132.665	8.63135	1	0	37	61	3.58007	7.69	9	9	6.97209	7.69	8	9	0	0	0	0	0	5.88	5	6	3.28595	6.97	8	9	1.7571	10.95	10	10	6	8.33333	1.38889	0.473931	≥ 0.05	C:eukaryotic translation initiation factor 3 complex; P:regulation of translational initiation; P:translational initiation; C:cytoplasm; P:translation; C:eukaryotic 43S preinitiation complex; P:formation of translation preinitiation complex; F:translation initiation factor activity; C:eukaryotic 48S preinitiation complex
A0A023FNK1	Putative conserved secreted protein (Fragment)	Amblyomma cajennense PE	602	66.5168	5.88428	1	1	10	15	0	0	0	0	0	0	0	0	0	5.48	3	3	0	0	0	0	0	3.99	2	2	1.32917	5.15	3	3	1	1.66667	1.66667	0.736966	≥ 0.05	P:oxidation-reduction process; F:oxidoreductase activity, acting on CH-OH group of donors; F:flavin adenine dinucleotide binding
A0A023FNK2	Putative polypyrimidine tract-binding protein puf60 rrm superfamily	Amblyomma cajennense PE	572	61.0697	5.8208	2	9	17	20	0	1.92	1	1	0	0	0	0	0	18.71	7	7	0	7.52	3	3	0	0	0	0	0	0	0	0	2.66667	1	0.375	-1.41504	≥ 0.05	F:nucleic acid binding; F:nucleotide binding
A0A023FNK3	Putative ribosomal protein (Fragment)	Amblyomma cajennense PE	203	21.9694	9.26123	1	0	9	14	0	0	0	0	0	18.72	3	3	0	26.11	4	4	0	13.79	2	2	0	0	0	0	0	0	0	0	2.33333	0.666667	0.285714	-1.80735	≥ 0.05	F:structural constituent of ribosome; P:translation; C:ribosome
A0A023FNK6	Putative secreted protein 55 (Fragment)	Amblyomma cajennense PE	607	66.7363	5.78271	3	4	12	32	0	5.6	4	5	0	9.56	6	6	0	6.92	3	4	1.70451	6.1	3	3	1.67005	7.91	4	4	1.69591	6.26	4	4	5	3.66667	0.733333	-0.447459	≥ 0.05	-
A0A023FNK9	Putative tick kunitz 1 (Fragment)	Amblyomma cajennense PE	203	23.165	8.52881	1	1	4	4	0	7.88	1	1	0	8.37	1	1	0	13.3	2	2	0	0	0	0	0	0	0	0	0	0	0	0	1.33333	0	0	#NUM!	≥ 0.05	P:negative regulation of endopeptidase activity; F:serine-type endopeptidase inhibitor activity
A0A023FNL0	Putative conserved secreted protein	Amblyomma cajennense PE	616	67.9069	5.85889	2	1	6	6	0	0	0	0	0	4.55	2	2	0	12.18	4	4	0	0	0	0	0	0	0	0	0	0	0	0	2	0	0	#NUM!	≥ 0.05	P:oxidation-reduction process; F:oxidoreductase activity, acting on CH-OH group of donors; F:flavin adenine dinucleotide binding
A0A023FNM4	Putative stoned b synaptic vesicle bioproteinsis protein (Fragment)	Amblyomma cajennense PE	599	68.0819	6.59521	1	1	7	10	0	0	0	0	0	0	0	0	0	0	0	0	0	6.01	3	3	0	6.01	3	3	0	0	0	0	0	2	#DIV/0!	#DIV/0!	≥ 0.05	C:clathrin adaptor complex; P:vesicle-mediated transport; P:intracellular protein transport; P:endocytosis
A0A023FNM5	Putative beta-spectrin (Fragment)	Amblyomma cajennense PE	1422	164.218	5.16064	1	0	52	96	8.13507	10.83	13	16	3.32089	7.31	10	10	3.22754	8.3	10	11	2.17907	9.85	12	14	5.80638	8.3	11	12	3.21041	9.35	12	15	12.3333	13.6667	1.10811	0.148099	≥ 0.05	-
A0A023FNM6	Putative alkyl hydroperoxide reductase thiol specific antioxidant (Fragment)	Amblyomma cajennense PE	214	23.5269	6.41748	1	3	20	109	19.4289	39.25	12	15	14.4235	48.13	16	19	25.1152	39.72	12	18	17.5272	31.31	7	12	17.5923	28.04	7	10	16.8787	29.91	9	10	17.3333	10.6667	0.615385	-0.70044	≥ 0.05	P:oxidation-reduction process; F:oxidoreductase activity; F:antioxidant activity; F:peroxiredoxin activity
A0A023FNN0	Putative insulin-degrading enzyme (Fragment)	Amblyomma cajennense PE	605	69.8127	7.03467	1	1	16	22	0	2.48	1	1	1.75978	8.6	4	4	0	9.92	4	4	0	11.57	5	5	0	0	0	0	0	13.39	5	5	3	3.33333	1.11111	0.152003	≥ 0.05	F:metal ion binding; P:metabolic process; F:catalytic activity
A0A023FNP0	Putative kinase-like protein (Fragment)	Amblyomma cajennense PE	616	67.1153	6.65381	1	1	18	27	1.976	5.19	2	2	0	3.73	1	1	1.69235	5.19	2	2	1.6911	7.95	4	6	0	3.25	2	2	1.63811	10.88	5	5	1.66667	4.33333	2.6	1.37851	≥ 0.05	F:kinase activity; P:phosphorylation
A0A023FNP2	Putative alpha crystallins (Fragment)	Amblyomma cajennense PE	127	14.3292	8.104	1	3	4	9	0	0	0	0	0	0	0	0	0	25.2	4	6	0	21.26	3	3	0	0	0	0	0	0	0	0	2	1	0.5	-1	≥ 0.05	-
A0A023FNP3	Uncharacterized protein	Amblyomma cajennense PE	220	25.348	9.11475	1	5	6	8	0	0	0	0	3.41553	17.73	4	4	2.12401	5.45	1	1	1.61184	18.18	2	3	0	0	0	0	0	0	0	0	1.66667	1	0.6	-0.736966	≥ 0.05	-
A0A023FNP9	Putative microplusin 1	Amblyomma cajennense PE	117	12.804	6.31592	2	2	3	6	0	0	0	0	0	0	0	0	0	0	0	0	0	22.22	2	2	0	0	0	0	0	35.9	3	3	0	1.66667	#DIV/0!	#DIV/0!	≥ 0.05	-
A0A023FNQ0	Putative scf ubiquitin ligase skp2 component (Fragment)	Amblyomma cajennense PE	222	25.9577	9.93506	1	1	7	9	0	0	0	0	0	19.82	3	3	0	9.01	2	2	0	0	0	0	0	6.76	1	1	0	8.56	1	1	1.66667	0.666667	0.4	-1.32193	≥ 0.05	F:ligase activity; P:metabolic process
A0A023FNR0	Putative emp24/gp25l/p24 family of membrane trafficking (Fragment)	Amblyomma cajennense PE	237	27.2955	7.32764	6	1	6	14	0	7.59	2	2	1.73796	2.95	1	1	0	0	0	0	0	13.5	4	4	0	5.91	2	2	0	0	0	0	1	2	2	1	≥ 0.05	C:integral component of membrane; C:membrane; P:transport
A0A023FNR5	Uncharacterized protein	Amblyomma cajennense PE	231	26.2492	9.92041	1	7	10	21	1.93342	13.42	3	3	1.60207	20.78	4	5	2.14499	14.29	3	3	0	0	0	0	0	18.61	3	3	0	9.96	2	3	3.66667	2	0.545455	-0.874469	≥ 0.05	-
A0A023FNS0	Putative x-ray repair complementing defective repair in chinese hamster cells 4 (Fragment)	Amblyomma cajennense PE	233	25.8038	5.21143	1	3	7	8	0	0	0	0	0	0	0	0	1.79625	11.59	2	2	0	0	0	0	1.9223	9.44	2	2	0	0	0	0	0.666667	0.666667	1	0	≥ 0.05	P:double-strand break repair; P:DNA recombination; C:nucleus; F:DNA binding
A0A023FNS1	Putative acyl-coa synthetase (Fragment)	Amblyomma cajennense PE	270	29.6391	6.68311	1	1	5	6	0	0	0	0	0	0	0	0	0	13.7	2	2	2.03617	5.93	1	1	0	0	0	0	0	0	0	0	0.666667	0.333333	0.5	-1	≥ 0.05	P:metabolic process; F:catalytic activity
A0A023FNS4	Putative geranylgeranyl pyrophosphate synthase/polyprenyl synthetase	Amblyomma cajennense PE	236	27.1169	5.2876	4	6	8	20	1.87642	13.98	3	3	3.88121	8.9	2	3	2.09082	20.76	4	4	1.89779	8.47	2	2	4.18096	3.81	1	2	1.83108	3.81	1	1	3.33333	1.66667	0.5	-1	≥ 0.05	P:isoprenoid biosynthetic process; F:transferase activity
A0A023FNT1	Putative lipocalin-3 1	Amblyomma cajennense PE	236	25.989	7.44482	1	3	5	13	0	16.1	2	2	4.16352	16.53	2	2	0	22.03	3	3	0	0	0	0	2.31528	13.14	2	2	0	0	0	0	2.33333	0.666667	0.285714	-1.80735	≥ 0.05	-
A0A023FNT4	Putative mitochondrial ribosomal protein s26	Amblyomma cajennense PE	240	28.2319	8.20654	2	1	6	11	0	0	0	0	0	0	0	0	0	11.25	2	2	0	3.33	1	1	0	0	0	0	0	3.33	1	1	0.666667	0.666667	1	0	≥ 0.05	C:mitochondrial small ribosomal subunit; C:ribosome
A0A023FNT6	Putative mitochondrial inner membrane protein mitofilin	Amblyomma cajennense PE	686	77.1714	7.07861	1	1	24	35	5.60001	14.43	7	7	0	5.98	3	4	0	0	0	0	0	0	0	0	1.6337	6.85	5	5	1.78823	17.64	9	9	3.66667	4.66667	1.27273	0.347923	≥ 0.05	C:mitochondrion; C:integral component of membrane; C:membrane; C:mitochondrial inner membrane
A0A023FNT7	Putative mediator of rna polymer	Amblyomma cajennense PE	239	26.9392	10.1987	6	2	6	13	0	0	0	0	1.68752	5.86	1	1	0	0	0	0	0	21.76	5	5	0	4.6	1	1	1.61312	4.6	1	2	0.333333	2.66667	8	3	≥ 0.05	F:RNA polymerase II transcription cofactor activity; C:mediator complex; P:regulation of transcription from RNA polymerase II promoter
A0A023FNU1	Putative ca2+-binding actin-bundling protein (Fragment)	Amblyomma cajennense PE	690	80.012	5.90967	1	0	33	71	12.1818	17.39	10	10	2.33168	13.48	7	7	16.8263	16.96	11	12	18.1851	16.09	12	15	24.7128	15.8	11	13	13.3631	10.43	6	6	9.66667	11.3333	1.17241	0.229482	≥ 0.05	P:actin filament bundle assembly; F:calcium ion binding; F:actin filament binding; P:actin crosslink formation
A0A023FNU7	Putative vesicle coat complex copi beta subunit (Fragment)	Amblyomma cajennense PE	704	78.3698	7.06396	1	0	26	44	0	7.24	5	5	1.74115	5.4	3	3	0	0	0	0	0	9.38	5	9	0	13.92	8	9	1.73302	12.22	8	8	2.66667	8.66667	3.25	1.70044	≥ 0.05	C:membrane coat; P:vesicle-mediated transport; C:cytoplasm; C:membrane; P:intracellular protein transport
A0A023FNU8	Ubiquinone biosynthesis protein COQ4 homolog, mitochondrial	Amblyomma cajennense PE	244	27.483	7.94287	2	7	11	24	0	25.82	6	7	0	14.34	3	5	0	0	0	0	0	18.03	3	4	0	17.21	4	4	0	0	0	0	4	2.66667	0.666667	-0.584963	≥ 0.05	C:mitochondrion; C:extrinsic component of mitochondrial inner membrane; P:ubiquinone biosynthetic process; C:membrane; C:mitochondrial inner membrane
A0A023FNV1	Putative acyl-coa synthetase	Amblyomma cajennense PE	715	78.9355	8.11865	2	4	20	28	0	9.79	6	7	0	7.41	6	6	0	0	0	0	1.69824	5.31	3	4	0	8.81	5	5	0	5.45	4	4	4.33333	4.33333	1	0	≥ 0.05	P:metabolic process; F:catalytic activity
A0A023FNV6	Putative glycyl-trna synthetase	Amblyomma cajennense PE	736	82.8716	8.00146	1	4	20	29	0	0	0	0	0	8.7	5	5	0	7.2	4	4	0	7.34	4	4	1.83822	4.76	3	4	1.91015	3.26	2	2	3	3.33333	1.11111	0.152003	≥ 0.05	P:glycyl-tRNA aminoacylation; F:ATP binding; C:cytoplasm; F:aminoacyl-tRNA ligase activity; F:nucleotide binding; P:tRNA aminoacylation for protein translation; F:glycine-tRNA ligase activity
A0A023FNW1	Putative cathepsin c (Fragment)	Amblyomma cajennense PE	202	22.772	7.12256	1	1	2	2	0	0	0	0	0	0	0	0	0	0	0	0	0	0	0	0	0	0	0	0	0	15.35	2	2	0	0.666667	#DIV/0!	#DIV/0!	≥ 0.05	P:proteolysis; F:cysteine-type peptidase activity
A0A023FNW2	Uncharacterized protein (Fragment)	Amblyomma cajennense PE	760	82.769	5.73193	2	3	17	30	3.67038	2.63	2	3	1.95685	1.58	2	2	0	11.18	5	5	3.82415	12.11	7	7	2.11885	4.74	3	3	3.9053	8.68	4	4	3.33333	4.66667	1.4	0.485427	≥ 0.05	P:negative regulation of endopeptidase activity; C:extracellular space; C:extracellular region; F:endopeptidase inhibitor activity
A0A023FNX6	Putative misato shows similarity with tubulin/ftsz family of gtp (Fragment)	Amblyomma cajennense PE	255	27.9751	8.04541	1	1	6	12	0	0	0	0	0	16.86	3	4	0	0	0	0	0	0	0	0	1.88064	9.02	2	2	1.86435	13.73	4	4	1.33333	2	1.5	0.584963	≥ 0.05	F:GTPase activity; P:metabolic process
A0A023FNX9	Putative acylamino-acid-releasing enzyme	Amblyomma cajennense PE	788	88.8341	6.53662	1	1	8	9	0	0	0	0	0	0	0	0	0	3.3	2	2	0	5.71	3	4	0	4.95	3	3	0	0	0	0	0.666667	2.33333	3.5	1.80735	≥ 0.05	P:proteolysis; F:serine-type peptidase activity
A0A023FNY5	Putative karyopherin importin beta 1 (Fragment)	Amblyomma cajennense PE	819	90.3081	4.729	1	2	16	29	0	7.69	3	3	0	9.04	3	3	1.84267	4.27	3	3	5.26456	5.37	3	4	1.71265	7.2	3	4	5.33888	5.62	4	5	3	4.33333	1.44444	0.530515	≥ 0.05	F:Ran GTPase binding; P:nucleocytoplasmic transport; P:intracellular protein transport; F:protein transporter activity; C:intracellular
A0A023FNY7	Peptidyl-prolyl cis-trans isomerase	Amblyomma cajennense PE	254	28.2665	9.40771	2	4	13	20	0	0	0	0	1.63372	23.62	4	4	3.27629	12.6	4	4	1.51697	11.81	3	3	0	0	0	0	0	15.35	2	2	2.66667	1.66667	0.625	-0.678072	≥ 0.05	F:peptidyl-prolyl cis-trans isomerase activity; P:protein folding; P:protein peptidyl-prolyl isomerization; F:isomerase activity
A0A023FNZ1	Putative pyruvate carboxylase (Fragment)	Amblyomma cajennense PE	841	93.6514	6.46826	1	3	18	22	0	0	0	0	0	5.11	3	3	3.42308	4.04	3	3	0	3.45	2	2	0	11.89	8	8	0	0	0	0	2	3.33333	1.66667	0.736966	≥ 0.05	F:biotin binding; F:DNA binding; F:ATP binding; F:catalytic activity; P:gluconeogenesis; F:pyruvate carboxylase activity; F:metal ion binding; P:pyruvate metabolic process; F:biotin carboxylase activity
A0A023FP00	Uncharacterized protein (Fragment)	Amblyomma cajennense PE	254	28.5968	9.30518	1	2	5	17	0	12.6	2	3	0	0	0	0	0	0	0	0	0	7.87	2	4	0	7.87	2	3	0	4.72	1	3	1	3.33333	3.33333	1.73697	≥ 0.05	-
A0A023FP03	Protein-cysteine n-palmitoyltransferase hhat (Fragment)	Amblyomma cajennense PE	269	31.0139	9.53955	1	3	12	23	6.15331	20.07	5	5	0	0	0	0	2.0869	10.78	3	3	2.33946	17.47	4	4	2.24534	10.78	3	3	2.41175	15.99	3	3	2.66667	3.33333	1.25	0.321928	≥ 0.05	F:transferase activity; C:integral component of membrane; P:metabolic process; C:membrane
A0A023FP04	Putative secreted protein (Fragment)	Amblyomma cajennense PE	157	17.3715	7.37158	2	1	9	25	0	13.38	2	2	0	0	0	0	0	0	0	0	0	22.29	3	6	0	29.3	4	7	0	29.3	4	6	0.666667	6.33333	9.5	3.24793	≥ 0.05	-
A0A023FP08	Uncharacterized protein	Amblyomma cajennense PE	277	30.1194	7.6499	2	2	6	10	0	0	0	0	0	10.83	2	2	0	5.42	1	1	0	7.58	2	3	0	18.77	4	4	0	0	0	0	1	2.33333	2.33333	1.22239	≥ 0.05	-
A0A023FP16	Uncharacterized protein	Amblyomma cajennense PE	280	30.1684	6.25244	1	1	3	3	0	9.29	3	3	0	0	0	0	0	0	0	0	0	0	0	0	0	0	0	0	0	0	0	0	1	0	0	#NUM!	≥ 0.05	-
A0A023FP19	Eukaryotic translation initiation factor 3 subunit C	Amblyomma cajennense PE	945	108.091	5.77002	1	4	27	45	0	0	0	0	0	7.3	6	6	0	7.51	7	7	0	10.16	7	7	0	6.98	5	5	0	8.25	6	7	4.33333	6.33333	1.46154	0.547488	≥ 0.05	C:eukaryotic translation initiation factor 3 complex; F:translation initiation factor binding; P:regulation of translational initiation; P:translational initiation; C:cytoplasm; P:translation; C:eukaryotic 43S preinitiation complex; F:RNA binding; P:formation of translation preinitiation complex; F:translation initiation factor activity; C:eukaryotic 48S preinitiation complex
A0A023FP20	Putative endoplasmic reticulum protein 29 (Fragment)	Amblyomma cajennense PE	285	32.1848	8.14795	1	4	16	28	2.28568	11.58	3	3	2.6311	6.32	2	4	4.24911	10.88	3	4	4.46625	17.89	5	5	0	12.28	4	4	2.24981	7.72	2	2	3.66667	3.66667	1	0	≥ 0.05	C:endoplasmic reticulum lumen; P:protein secretion; C:endoplasmic reticulum
A0A023FP24	Putative nadh-ubiquinone oxidoreductase ndufs3/30 kDa subunit	Amblyomma cajennense PE	269	30.9696	6.43018	1	1	2	2	0	0	0	0	0	0	0	0	0	0	0	0	0	0	0	0	0	0	0	0	0	9.67	2	2	0	0.666667	#DIV/0!	#DIV/0!	≥ 0.05	P:oxidation-reduction process; F:oxidoreductase activity; F:NADH dehydrogenase (ubiquinone) activity; F:oxidoreductase activity, acting on NAD(P)H
A0A023FP27	Putative mucin peritrophin salivary protein	Amblyomma cajennense PE	240	24.3045	4.42432	1	5	7	28	0	20.42	3	4	0	16.67	2	4	0	15	2	6	0	15	2	4	0	21.25	4	7	1.75012	2.92	1	1	4.66667	4	0.857143	-0.222392	≥ 0.05	F:chitin binding; P:chitin metabolic process; C:extracellular region
A0A023FP34	Putative karyopherin importin beta 3	Amblyomma cajennense PE	1096	122.606	4.85596	2	8	36	52	0	5.84	5	6	0	12.86	10	10	0	9.76	7	8	0	6.02	5	5	0	8.39	7	7	0	6.66	5	5	8	5.66667	0.708333	-0.4975	≥ 0.05	F:Ran GTPase binding; P:intracellular protein transport; C:intracellular
A0A023FP38	Putative oxidative phosphorylation (Fragment)	Amblyomma cajennense PE	285	31.7196	7.15186	2	1	7	13	1.63412	11.93	2	3	0	0	0	0	0	7.72	1	1	1.88997	11.58	2	2	0	7.72	1	1	1.89193	9.47	2	2	1.33333	1.66667	1.25	0.321928	≥ 0.05	-
A0A023FP39	Putative mitochondrial/ ribosomal protein l3 (Fragment)	Amblyomma cajennense PE	299	33.8639	10.6528	3	3	10	12	0	6.02	1	1	0	0	0	0	0	0	0	0	0	15.72	4	4	2.02929	18.06	4	4	0	5.35	2	2	0.333333	3.33333	10	3.32193	≥ 0.05	F:structural constituent of ribosome; P:translation; C:ribonucleoprotein complex; C:ribosome; C:intracellular
A0A023FP41	Putative vesicle coat complex copi alpha subunit (Fragment)	Amblyomma cajennense PE	1117	125.01	7.1665	1	0	23	34	0	7.97	4	4	0	1.25	1	1	0	10.56	7	8	1.3666	11.37	10	10	0	8.5	6	6	1.6244	5.82	5	5	4.33333	7	1.61538	0.691878	≥ 0.05	C:membrane coat; P:vesicle-mediated transport; C:COPI vesicle coat; F:structural molecule activity; P:intracellular protein transport
A0A023FP45	Uncharacterized protein	Amblyomma cajennense PE	113	12.8528	10.4771	2	4	6	17	3.52791	38.94	3	5	3.94029	27.43	2	3	0	29.2	3	4	1.80001	11.5	2	2	0	0	0	0	1.66214	7.08	1	1	4	1	0.25	-2	≥ 0.05	-
A0A023FP50	Putative conserved plasma membrane protein (Fragment)	Amblyomma cajennense PE	219	24.704	8.25049	1	2	5	11	0	0	0	0	0	13.24	2	2	0	0	0	0	0	0	0	0	0	0	0	0	0	19.63	3	4	0.666667	1.33333	2	1	≥ 0.05	-
A0A023FP51	Putative wd40 domain protein (Fragment)	Amblyomma cajennense PE	299	33.1024	6.17627	1	2	4	5	2.14808	8.7	2	2	0	6.35	1	1	0	13.38	2	2	0	0	0	0	0	0	0	0	0	0	0	0	1.66667	0	0	#NUM!	≥ 0.05	-
A0A023FP56	Uncharacterized protein	Amblyomma cajennense PE	320	35.4106	6.63916	1	4	5	7	0	10	3	3	0	0	0	0	0	0	0	0	0	0	0	0	0	0	0	0	0	0	0	0	1	0	0	#NUM!	≥ 0.05	P:endoplasmic reticulum-Golgi intermediate compartment organization; P:vesicle-mediated transport; C:cytoplasm; P:ER to Golgi vesicle-mediated transport; C:membrane; F:SNARE binding
A0A023FP58	Putative secreted protein (Fragment)	Amblyomma cajennense PE	209	22.8042	8.1333	1	3	4	5	0	0	0	0	0	0	0	0	0	0	0	0	0	23.92	4	4	0	9.57	1	1	0	0	0	0	0	1.66667	#DIV/0!	#DIV/0!	≥ 0.05	-
A0A023FP69	Uncharacterized protein (Fragment)	Amblyomma cajennense PE	324	36.1509	8.08936	1	4	12	22	0	23.15	5	6	0	16.05	5	7	0	0	0	0	0	8.33	3	4	0	0	0	0	0	11.73	4	5	4.33333	3	0.692308	-0.530515	≥ 0.05	-
A0A023FP70	Putative deddh 3'-5' exonuclease domain of three prime repair exonuclease	Amblyomma cajennense PE	338	36.9849	6.31592	1	1	4	5	0	0	0	0	0	0	0	0	0	0	0	0	0	13.02	3	4	0	4.73	1	1	0	0	0	0	0	1.66667	#DIV/0!	#DIV/0!	≥ 0.05	F:nucleic acid binding; F:exonuclease activity; P:nucleic acid phosphodiester bond hydrolysis
A0A023FP74	Putative chorion b-zip transcription factor mori chorion b-zip transcription factor	Amblyomma cajennense PE	328	36.2558	6.46826	3	1	5	7	0	0	0	0	1.62855	6.4	2	2	0	0	0	0	1.93287	2.74	1	1	1.68485	2.74	1	1	0	0	0	0	0.666667	0.666667	1	0	≥ 0.05	P:regulation of transcription, DNA-templated; F:sequence-specific DNA binding; F:transcription factor activity, sequence-specific DNA binding
A0A023FP75	Putative pseudouridylate synthase (Fragment)	Amblyomma cajennense PE	341	38.3993	7.15186	1	1	7	15	2.06335	8.21	2	2	0	0	0	0	1.78631	8.8	3	3	0	12.9	3	3	1.72183	9.09	2	2	0	0	0	0	1.66667	1.66667	1	0	≥ 0.05	-
A0A023FP83	Putative tick metalloprotease 45 (Fragment)	Amblyomma cajennense PE	354	39.6703	5.43994	1	3	9	17	0	18.36	4	4	0	14.41	4	6	0	11.86	3	3	0	6.78	1	2	0	0	0	0	0	0	0	0	4.33333	0.666667	0.153846	-2.70044	≥ 0.05	P:proteolysis; F:metallopeptidase activity; F:peptidase activity; F:metalloendopeptidase activity
A0A023FP86	Uncharacterized protein (Fragment)	Amblyomma cajennense PE	95	11.1428	7.44482	1	1	2	3	0	0	0	0	0	0	0	0	0	0	0	0	0	9.47	1	1	1.60348	16.84	2	2	0	0	0	0	0	1	#DIV/0!	#DIV/0!	≥ 0.05	P:ribosome biogenesis
A0A023FP87	Uncharacterized protein (Fragment)	Amblyomma cajennense PE	364	40.6438	8.25049	1	3	4	6	0	0	0	0	0	0	0	0	0	0	0	0	0	11.26	3	3	0	9.07	2	3	0	0	0	0	0	2	#DIV/0!	#DIV/0!	≥ 0.05	P:transcription, DNA-templated; F:DNA-directed DNA polymerase activity; P:DNA biosynthetic process; F:DNA binding
A0A023FP92	Putative dual specificity protein phosphat (Fragment)	Amblyomma cajennense PE	349	37.9801	8.35303	2	1	10	16	0	13.75	2	3	0	6.88	2	2	0	0	0	0	0	12.89	4	4	1.91448	10.6	4	4	0	0	0	0	1.66667	2.66667	1.6	0.678072	≥ 0.05	F:phosphatase activity; P:dephosphorylation; F:hydrolase activity; P:protein dephosphorylation; P:peptidyl-tyrosine dephosphorylation; F:protein tyrosine/serine/threonine phosphatase activity; F:protein tyrosine phosphatase activity
A0A023FPA9	Uncharacterized protein	Amblyomma cajennense PE	419	45.121	4.66553	1	5	6	7	1.7919	10.26	3	3	0	0	0	0	0	0	0	0	0	0	0	0	0	6.44	2	2	0	0	0	0	1	0.666667	0.666667	-0.584963	≥ 0.05	-
A0A023FPB1	Putative cytochrome p450 cyp3/cyp5/cyp6/cyp9 subfamily (Fragment)	Amblyomma cajennense PE	341	38.1356	8.33838	1	6	8	10	0	0	0	0	0	0	0	0	0	9.09	2	2	0	0	0	0	0	5.87	2	2	0	10.56	3	3	0.666667	1.66667	2.5	1.32193	≥ 0.05	P:oxidation-reduction process; F:oxidoreductase activity, acting on paired donors, with incorporation or reduction of molecular oxygen; F:heme binding; F:iron ion binding; F:oxidoreductase activity, acting on paired donors, with incorporation or reduction of molecular oxygen, reduced flavin or flavoprotein as one donor, and incorporation of one atom of oxygen; F:monooxygenase activity
A0A023FPB4	Putative transcription termination factor (Fragment)	Amblyomma cajennense PE	385	43.4633	7.69385	1	1	15	30	2.11354	14.81	5	7	0	9.61	2	2	0	10.13	2	2	1.78821	14.55	4	4	0	8.83	2	2	3.54499	27.27	8	9	3.66667	5	1.36364	0.447459	≥ 0.05	P:regulation of transcription, DNA-templated; C:mitochondrion; F:double-stranded DNA binding
A0A023FPB7	Putative cox16 cytochrome c oxidase assembly protein	Amblyomma cajennense PE	119	14.2064	9.48096	1	1	9	15	0	36.13	4	4	0	0	0	0	0	0	0	0	0	0	0	0	0	0	0	0	0	23.53	2	3	1.33333	1	0.75	-0.415037	≥ 0.05	C:mitochondrial membrane
A0A023FPB9	Putative cytochrome oxid	Amblyomma cajennense PE	436	48.2513	9.81787	1	2	8	16	0	0	0	0	0	0	0	0	0	7.8	3	4	2.17511	4.82	2	3	0	0	0	0	0	6.42	2	2	1.33333	1.66667	1.25	0.321928	≥ 0.05	C:integral component of membrane; P:protein insertion into membrane; C:membrane
A0A023FPD1	Putative perilipin-3	Amblyomma cajennense PE	419	45.0522	5.70654	1	2	14	39	2.14573	16.23	5	6	1.77677	7.16	3	4	3.67294	7.16	3	5	1.69071	6.21	2	4	2.21787	6.92	3	5	5.23547	12.17	4	6	5	5	1	0	≥ 0.05	-
A0A023FPD2	Putative glycosyl hydrolase family 47	Amblyomma cajennense PE	166	18.5955	6.3667	1	2	5	5	0	0	0	0	0	0	0	0	0	21.08	3	3	0	0	0	0	0	0	0	0	0	0	0	0	1	0	0	#NUM!	≥ 0.05	F:calcium ion binding; F:hydrolase activity; P:metabolic process; F:hydrolase activity, acting on glycosyl bonds; C:membrane; F:mannosyl-oligosaccharide 1,2-alpha-mannosidase activity
A0A023FPE3	Putative tick kunitz 1	Amblyomma cajennense PE	129	15.0131	8.04541	1	1	2	2	0	0	0	0	0	23.26	2	2	0	0	0	0	0	0	0	0	0	0	0	0	0	0	0	0	0.666667	0	0	#NUM!	≥ 0.05	P:negative regulation of endopeptidase activity; F:serine-type endopeptidase inhibitor activity
A0A023FPE6	Putative transcriptional effector ccr4-related protein (Fragment)	Amblyomma cajennense PE	474	52.4964	6.48096	1	1	11	16	0	10.97	4	4	0	13.92	4	4	1.69429	5.7	2	3	0	0	0	0	0	10.76	3	4	0	3.59	1	1	3.66667	1.66667	0.454545	-1.1375	≥ 0.05	-
A0A023FPG3	Putative na+/dicarboxylate na+/tricarboxylate and phosphate transporter (Fragment)	Amblyomma cajennense PE	381	42.3969	9.31982	2	2	6	10	0	0	0	0	0	0	0	0	0	9.71	4	4	0	0	0	0	6.26572	8.14	3	4	0	0	0	0	1.33333	1.33333	1	0	≥ 0.05	C:membrane; P:sodium ion transport; P:transmembrane transport; F:transporter activity
A0A023FPG6	Uncharacterized protein (Fragment)	Amblyomma cajennense PE	539	58.3829	9.89111	1	3	13	15	0	0	0	0	0	0	0	0	1.74234	10.2	6	6	1.61072	7.42	3	3	0	0	0	0	1.73643	15.03	6	6	2	3	1.5	0.584963	≥ 0.05	-
A0A023FPH0	Uncharacterized protein (Fragment)	Amblyomma cajennense PE	572	63.4618	5.46533	1	1	11	25	0	0	0	0	0	0	0	0	1.84564	13.11	4	5	0	8.92	4	4	3.51201	9.97	5	5	1.91898	6.47	4	4	1.66667	4.33333	2.6	1.37851	≥ 0.05	-
A0A023FPH1	Putative chitinase (Fragment)	Amblyomma cajennense PE	396	43.1628	7.40088	1	1	4	4	0	12.12	4	4	0	0	0	0	0	0	0	0	0	0	0	0	0	0	0	0	0	0	0	0	1.33333	0	0	#NUM!	≥ 0.05	P:chitin catabolic process; F:hydrolase activity, hydrolyzing O-glycosyl compounds; F:hydrolase activity; P:metabolic process; P:carbohydrate metabolic process; F:hydrolase activity, acting on glycosyl bonds; F:chitinase activity
A0A023FPH6	Uncharacterized protein (Fragment)	Amblyomma cajennense PE	567	62.4592	6.31592	1	4	15	17	0	6.53	2	2	2.33459	10.41	4	4	0	0	0	0	0	0	0	0	0	8.11	2	2	1.7269	16.75	6	7	2	3	1.5	0.584963	≥ 0.05	F:RNA binding
A0A023FPH9	Putative capricious (Fragment)	Amblyomma cajennense PE	411	46.4242	6.27783	1	5	13	18	0	0	0	0	0	12.9	3	3	0	12.65	3	3	0	18.73	5	5	0	15.82	4	4	0	0	0	0	2	3	1.5	0.584963	≥ 0.05	-
A0A023FPI5	Putative ferm domain-containing protein (Fragment)	Amblyomma cajennense PE	946	104.226	8.42627	1	4	20	26	0	0	0	0	2.06261	4.23	3	3	0	6.55	4	4	0	7.61	4	5	0	4.55	3	3	0	7.82	5	5	2.33333	4.33333	1.85714	0.893085	≥ 0.05	C:cytoskeleton
A0A023FPJ0	Putative 40s ribosomal protein s19 (Fragment)	Amblyomma cajennense PE	156	17.284	9.87646	2	4	17	38	7.07599	47.44	7	8	8.92517	36.54	5	6	3.86813	30.77	5	6	5.17343	29.49	4	4	2.30524	30.13	4	5	0	20.51	3	3	6.66667	4	0.6	-0.736966	≥ 0.05	F:structural constituent of ribosome; P:translation; C:ribosome; C:intracellular
A0A023FPJ2	Putative determination of adult lifespan (Fragment)	Amblyomma cajennense PE	216	24.8946	5.2876	3	1	7	9	2.1722	11.57	2	2	0	9.26	1	1	0	9.26	1	1	0	0	0	0	0	0	0	0	0	21.76	3	3	1.33333	1	0.75	-0.415037	≥ 0.05	F:calcium ion binding
A0A023FPJ3	Putative tpa exp: fatty acid-binding protein fabp (Fragment)	Amblyomma cajennense PE	159	17.7213	8.57275	8	1	6	10	1.62262	18.87	3	3	0	13.21	1	2	0	23.27	3	5	0	0	0	0	0	0	0	0	0	0	0	0	3.33333	0	0	#NUM!	≥ 0.05	F:lipid binding; P:transport; F:transporter activity
A0A023FPJ8	Putative secreted protein	Amblyomma cajennense PE	459	52.118	7.02002	1	1	9	12	0	0	0	0	0	0	0	0	0	12.64	3	3	0	5.45	2	3	0	0	0	0	0	9.8	2	2	1	1.66667	1.66667	0.736966	≥ 0.05	-
A0A023FPJ9	Uncharacterized protein	Amblyomma cajennense PE	820	91.3083	5.19873	1	3	16	21	0	5.98	4	5	0	0	0	0	0	7.07	4	4	0	5.85	3	4	0	5.24	4	4	0	0	0	0	3	2.66667	0.888889	-0.169925	≥ 0.05	-
A0A023FPL0	Protein disulfide-isomerase	Amblyomma cajennense PE	487	54.8706	6.55127	2	1	20	38	3.85182	17.66	8	8	0	5.34	3	3	0	20.12	7	7	2.14495	4.31	2	2	3.88117	17.86	7	7	0	14.78	6	6	6	5	0.833333	-0.263034	≥ 0.05	P:cell redox homeostasis; F:protein disulfide isomerase activity; P:metabolic process; P:protein folding; C:endoplasmic reticulum; F:isomerase activity
A0A023FPL8	Putative tick til 11	Amblyomma cajennense PE	98	11.0176	10.3452	2	2	5	10	0	22.45	1	1	1.60145	35.71	2	2	1.64213	35.71	2	2	0	0	0	0	0	0	0	0	0	0	0	0	1.66667	0	0	#NUM!	≥ 0.05	-
A0A023FPM3	Putative tick til 11	Amblyomma cajennense PE	98	10.9235	9.94971	2	2	7	12	1.91532	58.16	3	3	1.60145	45.92	3	3	1.64213	35.71	2	2	0	0	0	0	0	0	0	0	0	0	0	0	2.66667	0	0	#NUM!	≥ 0.05	-
A0A023FPM6	Putative tick til 1 (Fragment)	Amblyomma cajennense PE	98	11.0735	9.5542	1	1	3	35	3.57433	9.18	1	4	9.55871	25.51	2	6	3.35555	9.18	1	4	5.44271	9.18	1	4	3.51667	9.18	1	3	5.73524	9.18	1	6	4.66667	4.33333	0.928571	-0.106915	≥ 0.05	-
A0A023FPN3	Putative tick metalloprotease 1	Amblyomma cajennense PE	503	57.1146	7.31299	1	4	10	13	0	0	0	0	0	0	0	0	0	18.49	5	5	0	4.17	2	2	1.92391	7.75	3	3	0	0	0	0	1.66667	1.66667	1	0	≥ 0.05	P:proteolysis; F:metallopeptidase activity; F:peptidase activity; F:metalloendopeptidase activity
A0A023FPP3	Uncharacterized protein	Amblyomma cajennense PE	282	31.0992	6.43018	2	3	6	9	0	17.02	3	3	4.33121	9.93	2	3	0	0	0	0	0	4.61	1	1	0	0	0	0	0	0	0	0	2	0.333333	0.166667	-2.58496	≥ 0.05	F:mannose binding; F:mannose transmembrane transporter activity; C:lytic vacuole; C:integral component of membrane; P:mannose transport
A0A023FPP6	Uncharacterized protein (Fragment)	Amblyomma cajennense PE	180	20.8053	4.61475	1	2	5	14	0	7.78	1	1	0	0	0	0	2.50712	12.22	2	2	2.21012	27.22	3	5	0	16.11	2	2	0	7.78	1	1	1	2.66667	2.66667	1.41504	≥ 0.05	-
A0A023FPP9	Putative tick kunitz 81	Amblyomma cajennense PE	101	11.6353	5.07178	4	2	3	7	0	0	0	0	0	0	0	0	0	0	0	0	0	31.68	3	4	0	27.72	2	3	0	0	0	0	0	2.33333	#DIV/0!	#DIV/0!	≥ 0.05	P:negative regulation of endopeptidase activity; F:serine-type endopeptidase inhibitor activity
A0A023FPQ0	Putative aminopeptidase	Amblyomma cajennense PE	560	62.0543	7.1958	2	3	9	12	1.71451	14.64	5	5	0	0	0	0	0	0	0	0	0	5.71	3	5	0	0	0	0	0	0	0	0	1.66667	1.66667	1	0	≥ 0.05	P:regulation of signal transduction; P:proteolysis; F:aminopeptidase activity; C:membrane
A0A023FPR2	Putative dolichyl-diphosphooligosaccharide--protein glycosyltransferase subunit 1	Amblyomma cajennense PE	599	68.1836	7.78174	4	2	11	21	3.37555	4.34	3	4	0	3.34	1	1	0	3.84	2	2	1.63807	4.34	3	3	0	3.67	2	2	4.31585	8.68	4	5	2.33333	3.33333	1.42857	0.514573	≥ 0.05	C:endoplasmic reticulum membrane; P:protein glycosylation; F:transferase activity; C:integral component of membrane; C:membrane; C:endoplasmic reticulum; F:dolichyl-diphosphooligosaccharide-protein glycotransferase activity; F:transferase activity, transferring glycosyl groups
A0A023FPT2	Putative vacuolar sorting protein vps1 dynamin	Amblyomma cajennense PE	698	78.3354	7.66455	1	2	29	43	1.63926	10.03	5	5	0	11.89	6	7	0	6.59	4	5	0	13.32	7	8	2.25467	11.89	7	8	0	12.32	6	6	5.66667	7.33333	1.29412	0.371969	≥ 0.05	F:GTP binding; F:GTPase activity; P:metabolic process; F:nucleotide binding
A0A023FPT7	Putative heat shock protein 90	Amblyomma cajennense PE	795	90.9283	4.99561	1	1	35	83	4.52589	11.07	7	7	0	13.58	8	9	11.3251	16.73	12	13	14.2328	15.47	13	14	14.1723	12.33	10	11	10.385	10.94	8	9	9.66667	11.3333	1.17241	0.229482	≥ 0.05	F:unfolded protein binding; F:ATP binding; P:response to stress; P:protein folding
A0A023FPU7	Protein tyrosine phosphatase iva1	Amblyomma cajennense PE	199	22.5576	8.82178	2	1	7	9	0	42.71	4	4	2.19844	25.63	4	5	0	0	0	0	0	0	0	0	0	0	0	0	0	0	0	0	3	0	0	#NUM!	≥ 0.05	F:phosphatase activity; P:dephosphorylation; P:protein dephosphorylation; F:protein tyrosine/serine/threonine phosphatase activity
A0A023FPV0	Putative ensconsin (Fragment)	Amblyomma cajennense PE	345	38.6233	10.2573	1	2	16	24	0	0	0	0	0	13.04	3	3	1.7749	15.07	3	4	4.32462	7.54	3	3	1.67529	20.29	5	5	1.96126	14.78	3	3	2.33333	3.66667	1.57143	0.652077	≥ 0.05	P:microtubule cytoskeleton organization; C:microtubule cytoskeleton
A0A023FPV2	Putative glutathione s-transferase ixodes scapularis glutathione s-transferase	Amblyomma cajennense PE	393	44.2103	8.77783	1	7	15	29	2.18333	20.61	5	6	4.67369	14.25	3	4	2.02597	8.91	2	3	4.57217	9.41	2	3	2.19332	12.72	4	4	4.46969	15.27	4	6	4.33333	4.33333	1	0	≥ 0.05	P:oxidation-reduction process; P:cell redox homeostasis; F:electron carrier activity; F:transferase activity; P:metabolic process; F:protein disulfide oxidoreductase activity; C:cell
A0A023FPY8	Putative tick til 31 (Fragment)	Amblyomma cajennense PE	215	24.587	9.59814	1	5	22	46	3.95907	25.12	4	5	2.0378	33.02	6	7	3.49434	26.98	5	5	0	25.12	4	4	1.61122	41.4	7	9	1.88347	28.84	7	7	5.66667	6.66667	1.17647	0.234465	≥ 0.05	-
A0A023FPZ3	Putative tick kunitz 82	Amblyomma cajennense PE	127	14.9215	8.47021	1	1	2	7	1.24172	10.24	2	7	0	0	0	0	0	0	0	0	0	0	0	0	0	0	0	0	0	0	0	0	2.33333	0	0	#NUM!	≥ 0.05	P:negative regulation of endopeptidase activity; F:serine-type endopeptidase inhibitor activity
A0A023FPZ5	Putative peptidase c13 family (Fragment)	Amblyomma cajennense PE	394	44.0158	5.98584	1	2	6	8	1.68989	14.47	4	4	0	0	0	0	0	0	0	0	0	4.31	2	2	0	0	0	0	0	0	0	0	1.33333	0.666667	0.5	-1	≥ 0.05	P:proteolysis; F:peptidase activity
A0A023FQ10	Putative serine protease inhibitor ixodes scapularis serine protease inhibitor	Amblyomma cajennense PE	414	44.6873	7.45947	1	7	13	18	0	15.94	4	4	1.85572	21.98	4	4	1.97057	6.04	2	2	0	9.42	3	4	0	0	0	0	0	0	0	0	3.33333	1.33333	0.4	-1.32193	≥ 0.05	P:proteolysis; C:extracellular space; F:peptidase activity
A0A023FQ12	Putative secreted protease inhibitor	Amblyomma cajennense PE	131	14.9641	5.26221	2	1	2	2	2.16252	12.98	2	2	0	0	0	0	0	0	0	0	0	0	0	0	0	0	0	0	0	0	0	0	0.666667	0	0	#NUM!	≥ 0.05	P:proteolysis; P:negative regulation of endopeptidase activity; F:peptidase activity; F:serine-type endopeptidase inhibitor activity
A0A023FQ20	Uncharacterized protein	Amblyomma cajennense PE	445	50.9987	8.41162	2	1	17	25	0	7.64	2	2	1.64106	9.44	3	3	0	8.76	3	3	1.61622	6.97	2	3	0	16.18	7	8	0	6.97	2	2	2.66667	4.33333	1.625	0.70044	≥ 0.05	P:negative regulation of endopeptidase activity; F:serine-type endopeptidase inhibitor activity
A0A023FQ26	Putative oxidoreductase	Amblyomma cajennense PE	491	54.5388	6.53662	1	3	12	20	0	9.78	3	3	0	11.81	3	3	0	6.72	3	3	0	2.24	1	1	0	0	0	0	3.7147	8.35	2	3	3	1.33333	0.444444	-1.16993	≥ 0.05	P:oxidation-reduction process; F:oxidoreductase activity
A0A023FQ27	Putative evasin 1	Amblyomma cajennense PE	135	14.8494	8.47021	2	2	8	11	3.61266	17.78	3	4	0	0	0	0	0	0	0	0	2.99003	13.33	2	3	0	0	0	0	0	32.59	4	4	1.33333	2.33333	1.75	0.807355	≥ 0.05	-
A0A023FQ29	Putative glycosyltransferase	Amblyomma cajennense PE	476	53.9946	7.76709	1	1	6	8	0	0	0	0	0	4.83	1	2	0	0	0	0	3.06596	15.13	5	6	0	0	0	0	0	0	0	0	0.666667	2	3	1.58496	≥ 0.05	P:biosynthetic process; F:transferase activity
A0A023FQ34	Putative tick cistatins 1	Amblyomma cajennense PE	136	14.9855	5.23682	1	2	3	5	2.5711	11.76	1	1	2.76801	22.06	2	2	4.56882	24.26	2	2	0	0	0	0	0	0	0	0	0	0	0	0	1.66667	0	0	#NUM!	≥ 0.05	F:peptidase inhibitor activity; P:negative regulation of endopeptidase activity; F:cysteine-type endopeptidase inhibitor activity; P:negative regulation of peptidase activity
A0A023FQ38	Uncharacterized protein	Amblyomma cajennense PE	240	27.0786	4.86865	1	2	5	10	0	5	1	1	0	0	0	0	0	9.17	2	2	0	6.25	1	1	0	6.25	1	2	0	6.25	1	2	1	1.66667	1.66667	0.736966	≥ 0.05	-
A0A023FQ44	Uncharacterized protein (Fragment)	Amblyomma cajennense PE	140	14.9372	4.84326	1	2	3	9	0	0	0	0	0	0	0	0	0	0	0	0	0	45.71	3	5	0	0	0	0	2.609	22.14	1	2	0	2.33333	#DIV/0!	#DIV/0!	≥ 0.05	-
A0A023FQ47	Putative secreted protein (Fragment)	Amblyomma cajennense PE	142	15.8948	7.66455	1	1	7	15	0	0	0	0	0	0	0	0	0	16.2	2	2	1.6366	23.94	3	3	0	21.83	3	4	1.65411	11.97	3	5	0.666667	4	6	2.58496	≥ 0.05	-
A0A023FQ49	Putative conserved secreted protein	Amblyomma cajennense PE	141	15.6298	9.15869	6	1	4	5	0	0	0	0	0	0	0	0	0	0	0	0	0	27.66	2	3	1.67724	14.18	2	2	0	0	0	0	0	1.66667	#DIV/0!	#DIV/0!	≥ 0.05	-
A0A023FQ56	Putative secreted mucin	Amblyomma cajennense PE	145	15.1841	4.42432	1	2	3	4	0	0	0	0	2.13113	31.03	3	4	0	0	0	0	0	0	0	0	0	0	0	0	0	0	0	0	1.33333	0	0	#NUM!	≥ 0.05	-
A0A023FQ57	Putative alpha-16-fucosyltransferase	Amblyomma cajennense PE	554	62.4039	8.45557	1	2	8	12	0	0	0	0	1.60187	7.04	4	5	0	0	0	0	1.64846	10.47	4	5	1.62796	3.79	2	2	0	0	0	0	1.66667	2.33333	1.4	0.485427	≥ 0.05	F:transferase activity; P:metabolic process; F:transferase activity, transferring glycosyl groups
A0A023FQ60	Putative glycosyl hydrolase family 47	Amblyomma cajennense PE	580	65.8585	6.39209	1	3	5	11	0	5.52	3	4	0	0	0	0	0	0	0	0	0	0	0	0	1.77736	3.62	3	4	3.62803	4.83	3	3	1.33333	2.33333	1.75	0.807355	≥ 0.05	F:calcium ion binding; F:hydrolase activity; P:metabolic process; F:hydrolase activity, acting on glycosyl bonds; C:membrane; F:mannosyl-oligosaccharide 1,2-alpha-mannosidase activity
A0A023FQ72	Putative cysteine rich secreted protein (Fragment)	Amblyomma cajennense PE	152	16.5376	6.66846	1	1	2	2	0	11.18	2	2	0	0	0	0	0	0	0	0	0	0	0	0	0	0	0	0	0	0	0	0	0.666667	0	0	#NUM!	≥ 0.05	-
A0A023FQ87	Putative kunitz-type serine protease inhibitor	Amblyomma cajennense PE	158	17.5222	8.41162	1	2	6	14	0	22.15	2	2	2.34828	19.62	2	2	0	22.15	3	3	0	0	0	0	2.22977	9.49	1	2	1.75947	8.86	1	1	2.33333	1	0.428571	-1.22239	≥ 0.05	P:proteolysis; P:negative regulation of endopeptidase activity; F:peptidase activity; F:serine-type endopeptidase inhibitor activity
A0A023FQ98	Putative atp synthase subunit b	Amblyomma cajennense PE	267	30.635	9.21729	2	2	8	17	0	4.49	1	1	0	4.87	1	1	0	16.48	3	3	0	9.36	2	2	0	4.49	1	2	0	16.48	3	4	1.66667	2.66667	1.6	0.678072	≥ 0.05	F:hydrogen ion transmembrane transporter activity; P:ATP synthesis coupled proton transport; C:mitochondrial proton-transporting ATP synthase complex, coupling factor F(o)
A0A023FQ99	Uncharacterized protein (Fragment)	Amblyomma cajennense PE	275	29.564	5.09717	1	1	5	21	2.2009	8	2	2	0	0	0	0	0	0	0	0	2.003	12.36	3	4	2.09164	12.36	3	6	0	16.36	4	6	0.666667	5.33333	8	3	≥ 0.05	-
A0A023FQA3	Putative mitochondrial ribosomal protein l9	Amblyomma cajennense PE	279	31.7139	9.31982	1	1	9	18	0	0	0	0	0	0	0	0	0	22.94	6	6	0	0	0	0	0	10.04	3	5	1.66535	10.39	3	4	2	3	1.5	0.584963	≥ 0.05	F:structural constituent of ribosome; P:translation; C:ribosome; C:intracellular
A0A023FQA5	Putative small heat shock protein ii	Amblyomma cajennense PE	178	20.2243	8.48486	1	1	10	26	0	0	0	0	3.20978	26.4	4	5	2.3394	20.79	3	4	2.89171	19.66	3	3	2.91861	14.61	3	4	3.99486	16.29	3	3	3	3.33333	1.11111	0.152003	≥ 0.05	-
A0A023FQB6	Putative leucine-rich repeat-containing protein 58 (Fragment)	Amblyomma cajennense PE	300	33.1773	8.32373	3	6	8	24	1.74858	20.33	4	6	0	0	0	0	0	5	1	4	0	0	0	0	2.32636	14	4	6	0	21.67	5	8	3.33333	4.66667	1.4	0.485427	≥ 0.05	-
A0A023FQC5	Putative tick cistatins 1	Amblyomma cajennense PE	164	18.1938	10.2573	1	5	7	8	0	0	0	0	0	0	0	0	0	0	0	0	0	9.15	2	2	0	4.88	1	1	1.61287	25	4	5	0	2.66667	#DIV/0!	#DIV/0!	≥ 0.05	P:negative regulation of endopeptidase activity; F:cysteine-type endopeptidase inhibitor activity
A0A023FQC7	Putative forkhead/hnf3 family transcription factor (Fragment)	Amblyomma cajennense PE	319	35.2805	7.63525	5	1	8	11	0	21.94	4	4	0	0	0	0	0	0	0	0	0	0	0	0	0	20.38	4	4	0	13.48	2	2	1.33333	2	1.5	0.584963	≥ 0.05	P:regulation of transcription, DNA-templated; F:sequence-specific DNA binding; F:transcription factor activity, sequence-specific DNA binding; F:DNA binding
A0A023FQC8	Putative salivary sulfotransferase ixodes scapularis salivary sulfotransferase (Fragment)	Amblyomma cajennense PE	327	37.7918	8.47021	2	2	13	33	2.29034	6.42	1	2	4.74621	13.76	3	4	7.34752	9.48	2	4	2.28335	14.37	3	3	7.74209	13.46	4	6	7.45089	21.71	5	7	3.33333	5.33333	1.6	0.678072	≥ 0.05	F:transferase activity; P:metabolic process; F:sulfotransferase activity
A0A023FQD6	Putative kunitz-type serine protease inhibitor	Amblyomma cajennense PE	166	19.4873	8.82178	1	1	4	5	0	18.07	2	2	0	0	0	0	0	0	0	0	0	19.88	2	3	0	0	0	0	0	0	0	0	0.666667	1	1.5	0.584963	≥ 0.05	P:proteolysis; P:negative regulation of endopeptidase activity; F:peptidase activity; F:serine-type endopeptidase inhibitor activity
A0A023FQE1	Putative aldehyde dehydrogenase (Fragment)	Amblyomma cajennense PE	418	45.2914	8.93896	1	3	17	23	0	12.92	4	4	0	11.48	3	3	0	12.92	4	4	0	0	0	0	0	0	0	0	0	9.57	3	4	3.66667	1.33333	0.363636	-1.45943	≥ 0.05	P:oxidation-reduction process; F:oxidoreductase activity; F:oxidoreductase activity, acting on the aldehyde or oxo group of donors, NAD or NADP as acceptor; P:metabolic process
A0A023FQE7	Putative secreted protein	Amblyomma cajennense PE	172	18.7606	6.82959	1	2	4	7	0	24.42	2	3	0	0	0	0	0	0	0	0	0	0	0	0	0	31.98	3	4	0	0	0	0	1	1.33333	1.33333	0.415037	≥ 0.05	-
A0A023FQF7	Putative secreted protein	Amblyomma cajennense PE	178	19.3042	6.93213	1	1	2	2	0	0	0	0	0	0	0	0	0	0	0	0	0	0	0	0	0	11.24	2	2	0	0	0	0	0	0.666667	#DIV/0!	#DIV/0!	≥ 0.05	-
A0A023FQF9	Putative transcriptional regulator atrx	Amblyomma cajennense PE	358	39.5804	5.2749	1	1	9	14	0	13.13	4	4	1.69761	6.7	2	3	0	0	0	0	0	0	0	0	1.62593	13.41	3	3	0	0	0	0	2.33333	1	0.428571	-1.22239	≥ 0.05	-
A0A023FQG1	Putative secreted protein	Amblyomma cajennense PE	175	18.9999	6.82959	1	1	4	4	0	0	0	0	0	0	0	0	0	18.29	3	3	0	10.29	1	1	0	0	0	0	0	0	0	0	1	0.333333	0.333333	-1.58496	≥ 0.05	-
A0A023FQH9	Putative serine-threonine protein kin (Fragment)	Amblyomma cajennense PE	435	47.7033	5.61768	1	1	5	6	0	0	0	0	0	0	0	0	0	0	0	0	0	0	0	0	1.72801	6.9	3	3	0	0	0	0	0	1	#DIV/0!	#DIV/0!	≥ 0.05	F:ATP binding; F:protein kinase activity; P:protein phosphorylation
A0A023FQI2	Uncharacterized protein	Amblyomma cajennense PE	179	20.3079	7.94287	1	2	3	4	0	0	0	0	0	0	0	0	0	0	0	0	0	0	0	0	0	15.08	2	3	0	0	0	0	0	1	#DIV/0!	#DIV/0!	≥ 0.05	-
A0A023FQI3	Putative nucleolar and coiled-body phosphoprotein 1 (Fragment)	Amblyomma cajennense PE	446	47.4743	9.40771	1	3	5	5	0	11.21	2	2	0	10.09	2	2	0	0	0	0	1.83381	1.57	1	1	0	0	0	0	0	0	0	0	1.33333	0.333333	0.25	-2	≥ 0.05	-
A0A023FQK5	Putative leucine-rich repeat protein (Fragment)	Amblyomma cajennense PE	520	58.9004	6.56592	3	1	7	8	0	8.27	3	3	0	0	0	0	0	3.27	1	1	0	0	0	0	0	9.62	3	3	0	0	0	0	1.33333	1	0.75	-0.415037	≥ 0.05	-
A0A023FQL0	Putative tick metalloprotease 1 (Fragment)	Amblyomma cajennense PE	542	60.8547	8.04541	1	6	14	20	0	0	0	0	0	17.53	5	5	0	0	0	0	0	0	0	0	0	9.59	4	4	0	9.23	3	3	1.66667	2.33333	1.4	0.485427	≥ 0.05	P:proteolysis; F:metallopeptidase activity; F:peptidase activity; F:metalloendopeptidase activity
A0A023FQL4	Putative secreted protein 94	Amblyomma cajennense PE	185	21.6952	8.73389	1	2	3	3	0	0	0	0	0	9.73	2	2	0	0	0	0	0	0	0	0	0	0	0	0	0	0	0	0	0.666667	0	0	#NUM!	≥ 0.05	-
A0A023FQM1	Putative secreted protein (Fragment)	Amblyomma cajennense PE	191	21.3964	4.99561	1	1	6	7	0	0	0	0	0	0	0	0	0	0	0	0	2.15746	16.75	3	3	0	19.9	3	3	0	0	0	0	0	2	#DIV/0!	#DIV/0!	≥ 0.05	-
A0A023FQN0	Putative conserved plasma membrane protein	Amblyomma cajennense PE	168	18.9928	8.90967	1	1	2	2	0	0	0	0	0	0	0	0	0	22.62	2	2	0	0	0	0	0	0	0	0	0	0	0	0	0.666667	0	0	#NUM!	≥ 0.05	P:tail-anchored membrane protein insertion into ER membrane
A0A023FQP1	Putative tick kunitz 88	Amblyomma cajennense PE	191	21.7714	8.5874	1	4	10	12	0	0	0	0	0	23.56	2	2	0	12.04	1	2	0	14.14	2	2	0	25.65	3	3	0	0	0	0	1.33333	1.66667	1.25	0.321928	≥ 0.05	P:negative regulation of endopeptidase activity; F:serine-type endopeptidase inhibitor activity
A0A023FQP4	Putative mucin peritrophin salivary protein (Fragment)	Amblyomma cajennense PE	228	23.7324	4.94482	3	4	5	7	0	0	0	0	0	0	0	0	0	6.58	1	1	0	0	0	0	0	15.79	2	3	2.14485	14.47	3	3	0.333333	2	6	2.58496	≥ 0.05	F:chitin binding; P:chitin metabolic process; C:extracellular region
A0A023FQP8	Putative peroxinectin ixodes scapularis peroxinectin (Fragment)	Amblyomma cajennense PE	701	80.5715	5.88428	1	2	5	5	0	0	0	0	0	8.13	3	3	0	0	0	0	0	0	0	0	0	3.71	2	2	0	0	0	0	1	0.666667	0.666667	-0.584963	≥ 0.05	P:oxidation-reduction process; F:heme binding; P:response to oxidative stress; F:peroxidase activity
A0A023FQQ8	Putative cytochrome p450 cyp2 subfamily protein (Fragment)	Amblyomma cajennense PE	195	22.7248	8.95361	1	2	5	11	1.78132	5.13	1	1	0	0	0	0	1.66937	5.13	1	1	3.53223	22.05	5	5	1.66936	5.13	1	1	1.69585	5.13	1	1	0.666667	2.33333	3.5	1.80735	≥ 0.05	P:oxidation-reduction process; F:oxidoreductase activity, acting on paired donors, with incorporation or reduction of molecular oxygen; F:heme binding; F:iron ion binding
A0A023FQR4	Putative conserved plasma membrane protein	Amblyomma cajennense PE	109	12.3251	9.5249	2	3	6	8	1.69216	51.38	3	3	0	0	0	0	0	0	0	0	0	37.61	2	2	0	46.79	3	3	0	0	0	0	1	1.66667	1.66667	0.736966	≥ 0.05	C:integral component of membrane; C:membrane
A0A023FQT7	Putative tick defensins 1 (Fragment)	Amblyomma cajennense PE	94	10.2663	9.59814	3	3	3	3	0	0	0	0	0	0	0	0	0	0	0	0	0	0	0	0	0	38.3	2	2	0	0	0	0	0	0.666667	#DIV/0!	#DIV/0!	≥ 0.05	P:defense response
A0A023FQU0	Uncharacterized protein	Amblyomma cajennense PE	103	11.8698	8.38232	1	2	6	12	0	0	0	0	0	19.42	1	1	1.80421	8.74	1	2	1.79715	27.18	2	2	0	21.36	2	2	1.63046	14.56	2	2	1	2	2	1	≥ 0.05	-
A0A023FQV2	Putative ethanolaminephosphotransferase ixodes scapularis ethanolaminephosphotransferase (Fragment)	Amblyomma cajennense PE	87	9.86997	9.86182	1	1	3	3	0	0	0	0	0	0	0	0	0	0	0	0	0	54.02	3	3	0	0	0	0	0	0	0	0	0	1	#DIV/0!	#DIV/0!	≥ 0.05	F:transferase activity; P:metabolic process
A0A023FQV4	Putative secreted protein	Amblyomma cajennense PE	206	23.2268	7.02002	1	1	3	5	0	0	0	0	0	0	0	0	0	0	0	0	0	0	0	0	0	0	0	0	0	15.05	2	2	0	0.666667	#DIV/0!	#DIV/0!	≥ 0.05	-
A0A023FQV5	Uncharacterized protein	Amblyomma cajennense PE	107	11.8122	9.81787	1	1	7	11	0	0	0	0	0	56.07	4	4	0	0	0	0	1.66869	25.23	2	3	0	0	0	0	0	0	0	0	1.33333	1	0.75	-0.415037	≥ 0.05	-
A0A023FQY0	Uncharacterized protein	Amblyomma cajennense PE	108	12.2012	9.05615	6	1	4	5	0	15.74	1	1	0	0	0	0	0	0	0	0	0	0	0	0	2.15437	45.37	4	4	0	0	0	0	0.333333	1.33333	4	2	≥ 0.05	-
A0A023FQY5	Putative secreted protein (Fragment)	Amblyomma cajennense PE	306	33.5735	5.16064	1	4	11	20	0	0	0	0	0	18.3	4	4	2.00139	29.08	5	5	3.70311	29.74	6	6	0	0	0	0	2.07099	12.42	2	2	3	2.66667	0.888889	-0.169925	≥ 0.05	-
A0A023FR01	Putative licpodalin-4 1 (Fragment)	Amblyomma cajennense PE	217	24.7281	6.7417	1	1	5	10	2.33129	5.53	1	1	0	5.99	1	1	0	19.82	3	3	0	0	0	0	1.83859	15.21	3	4	2.67338	5.53	1	1	1.66667	1.66667	1	0	≥ 0.05	-
A0A023FR08	Peptidyl-prolyl cis-trans isomerase	Amblyomma cajennense PE	253	28.0362	9.18799	1	1	9	17	0	0	0	0	1.63372	22.92	4	5	1.58449	9.09	3	3	1.51697	18.97	4	4	0	0	0	0	0	7.91	1	1	2.66667	1.66667	0.625	-0.678072	≥ 0.05	F:peptidyl-prolyl cis-trans isomerase activity; P:protein folding; P:protein peptidyl-prolyl isomerization; F:isomerase activity
A0A023FR48	Putative secreted protein	Amblyomma cajennense PE	221	25.6163	10.0669	1	1	15	19	0	0	0	0	0	36.65	4	4	0	24.89	4	4	1.99034	10.41	2	2	0	26.24	5	5	0	0	0	0	2.66667	2.33333	0.875	-0.192645	≥ 0.05	-
A0A023FR54	Putative conserved secreted protein (Fragment)	Amblyomma cajennense PE	232	26.5138	9.71533	1	1	7	12	0	12.5	2	2	0	11.64	4	4	0	0	0	0	0	7.33	1	1	0	8.19	1	1	0	10.78	2	2	2	1.33333	0.666667	-0.584963	≥ 0.05	-
A0A023FR58	Uncharacterized protein	Amblyomma cajennense PE	96	11.1179	6.80029	5	3	8	12	2.05149	12.5	1	1	0	35.42	3	3	0	0	0	0	0	0	0	0	1.63661	40.63	4	4	2.28177	12.5	1	1	1.33333	1.66667	1.25	0.321928	≥ 0.05	-
A0A023FR61	Putative secreted protein	Amblyomma cajennense PE	223	24.5568	7.15186	4	2	7	17	0	4.04	1	1	0	12.11	2	2	0	10.76	2	2	0	8.52	2	3	1.77768	11.66	2	2	1.71458	8.97	2	2	1.66667	2.33333	1.4	0.485427	≥ 0.05	-
A0A023FR73	Putative secreted protein	Amblyomma cajennense PE	240	25.6925	5.63037	1	4	8	10	0	17.92	3	4	0	0	0	0	0	0	0	0	0	24.58	4	4	0	0	0	0	0	0	0	0	1.33333	1.33333	1	0	≥ 0.05	-
A0A023FR86	Putative lipocalin-3 1 (Fragment)	Amblyomma cajennense PE	234	26.0392	8.79248	1	1	4	4	0	0	0	0	0	0	0	0	0	0	0	0	0	16.67	2	2	1.68446	8.55	2	2	0	0	0	0	0	1.33333	#DIV/0!	#DIV/0!	≥ 0.05	-
A0A023FRA2	Putative tick kunitz 26	Amblyomma cajennense PE	142	16.256	9.96436	1	1	2	2	0	0	0	0	0	19.72	2	2	0	0	0	0	0	0	0	0	0	0	0	0	0	0	0	0	0.666667	0	0	#NUM!	≥ 0.05	P:negative regulation of endopeptidase activity; F:serine-type endopeptidase inhibitor activity
A0A023FRB1	Putative m13 family peptidase	Amblyomma cajennense PE	254	28.6842	4.69092	1	4	6	11	2.11444	15.35	2	2	0	16.93	2	2	0	6.3	1	1	1.81959	13.39	2	3	1.72723	3.94	1	1	0	16.14	2	2	1.66667	2	1.2	0.263034	≥ 0.05	P:proteolysis; F:metalloendopeptidase activity
A0A023FRB6	Putative gamma-interferon inducible lysosomal thiol reductase	Amblyomma cajennense PE	296	32.9033	9.0415	1	1	12	20	1.84944	10.14	2	2	0	0	0	0	0	14.53	2	3	2.32639	16.55	4	6	0	16.89	4	4	3.33372	12.5	3	4	1.66667	4.66667	2.8	1.48543	≥ 0.05	-
A0A023FRB8	Putative tick til 10	Amblyomma cajennense PE	146	16.6358	9.1001	13	2	3	4	0	0	0	0	0	0	0	0	1.68023	23.97	2	2	0	0	0	0	0	0	0	0	0	0	0	0	0.666667	0	0	#NUM!	≥ 0.05	-
A0A023FRC8	Putative tick metalloprotease 1 (Fragment)	Amblyomma cajennense PE	313	34.9292	6.66846	1	1	4	4	0	0	0	0	0	6.07	2	2	1.79334	4.47	1	1	0	0	0	0	0	0	0	0	0	0	0	0	1	0	0	#NUM!	≥ 0.05	P:proteolysis; F:metallopeptidase activity; F:peptidase activity
A0A023FRE5	Putative tick metalloprotease 38 (Fragment)	Amblyomma cajennense PE	354	39.8766	6.66846	1	1	6	8	0	10.45	2	2	0	0	0	0	0	0	0	0	0	0	0	0	0	13.56	3	3	0	0	0	0	0.666667	1	1.5	0.584963	≥ 0.05	P:proteolysis; F:metallopeptidase activity; F:peptidase activity; F:metalloendopeptidase activity
A0A023FRG0	Putative 17 beta-hydroxysteroid dehydrogenase type 3	Amblyomma cajennense PE	353	39.2983	9.11475	1	1	5	6	0	10.48	4	4	0	0	0	0	0	0	0	0	0	5.95	1	2	0	0	0	0	0	0	0	0	1.33333	0.666667	0.5	-1	≥ 0.05	P:oxidation-reduction process; F:oxidoreductase activity; P:metabolic process
A0A023FRG4	Putative kunitz-type serine protease inhibitor	Amblyomma cajennense PE	159	18.3078	8.71924	1	1	4	7	0	0	0	0	0	0	0	0	0	0	0	0	0	0	0	0	0	0	0	0	1.6135	8.18	2	3	0	1	#DIV/0!	#DIV/0!	≥ 0.05	P:proteolysis; P:negative regulation of endopeptidase activity; F:peptidase activity; F:serine-type endopeptidase inhibitor activity
A0A023FRG5	Putative mitochondrial ribosomal protein l43 (Fragment)	Amblyomma cajennense PE	192	22.2161	9.74463	1	2	7	13	0	4.69	1	1	0	4.69	1	1	0	35.94	5	5	0	8.85	3	3	0	0	0	0	0	16.67	2	2	2.33333	1.66667	0.714286	-0.485427	≥ 0.05	C:ribosome
A0A023FRG9	Putative cytochrome oxidase complex assembly protein 1	Amblyomma cajennense PE	159	18.0204	9.27588	1	1	6	8	0	0	0	0	0	0	0	0	0	0	0	0	0	0	0	0	1.78674	13.84	2	2	0	22.01	3	3	0	1.66667	#DIV/0!	#DIV/0!	≥ 0.05	-
A0A023FRH2	Putative vitellogenin receptor ixodes scapularis vitellogenin receptor	Amblyomma cajennense PE	389	43.0491	4.69092	1	1	14	26	0	11.57	3	3	0	17.48	4	4	0	9	2	2	0	18.25	4	5	0	13.37	3	5	0	10.8	3	3	3	4.33333	1.44444	0.530515	≥ 0.05	-
A0A023FRH5	Putative catalytic domain of cg14945-like protein (Fragment)	Amblyomma cajennense PE	424	49.0073	7.47412	1	1	6	12	0	0	0	0	0	0	0	0	1.72783	9.91	3	3	2.18031	4.25	2	3	0	0	0	0	0	3.77	2	3	1	2	2	1	≥ 0.05	P:lipid metabolic process; F:phosphoric diester hydrolase activity
A0A023FRI3	Putative secreted protein	Amblyomma cajennense PE	416	45.3516	5.59229	1	2	7	12	0	0	0	0	2.15934	9.38	3	3	0	5.53	2	2	3.58742	15.38	5	5	0	0	0	0	0	0	0	0	1.66667	1.66667	1	0	≥ 0.05	-
A0A023FRI4	Uncharacterized protein	Amblyomma cajennense PE	201	22.7565	7.13721	1	3	5	23	0	29.85	3	4	2.43253	21.39	2	6	0	0	0	0	0	23.88	2	4	0	21.39	2	4	0	16.42	2	2	3.33333	3.33333	1	0	≥ 0.05	-
A0A023FRI9	Putative peptidase family m13 includes neprilysin	Amblyomma cajennense PE	427	48.2246	5.80811	1	5	15	29	0	0	0	0	1.82766	12.88	3	5	4.31331	7.73	2	5	0	13.35	4	4	2.08304	13.58	4	4	1.63291	15.46	4	4	3.33333	4	1.2	0.263034	≥ 0.05	P:proteolysis; F:metalloendopeptidase activity
A0A023FRJ2	Uncharacterized protein	Amblyomma cajennense PE	205	21.3961	12.1909	1	1	4	8	0	0	0	0	1.63996	20	3	4	0	0	0	0	0	0	0	0	0	0	0	0	0	8.78	1	1	1.33333	0.333333	0.25	-2	≥ 0.05	-
A0A023FRJ3	Putative membrane glycoprotein lig-1	Amblyomma cajennense PE	470	52.3266	7.69385	1	1	13	30	2.35263	12.13	4	5	0	0	0	0	2.25736	4.68	2	2	4.32675	5.32	2	3	3.99658	11.49	6	9	2.00976	6.38	3	4	2.33333	5.33333	2.28571	1.19265	≥ 0.05	-
A0A023FRJ4	Putative disintigrin (Fragment)	Amblyomma cajennense PE	171	18.4686	7.73779	1	1	2	2	0	0	0	0	0	0	0	0	0	0	0	0	0	0	0	0	0	0	0	0	0	17.54	2	2	0	0.666667	#DIV/0!	#DIV/0!	≥ 0.05	-
A0A023FRJ5	Putative salivary gland metalloprotease	Amblyomma cajennense PE	506	57.9909	6.53662	1	1	6	6	0	0	0	0	0	12.06	4	4	0	0	0	0	0	0	0	0	0	7.31	2	2	0	0	0	0	1.33333	0.666667	0.5	-1	≥ 0.05	P:proteolysis; F:metallopeptidase activity; F:peptidase activity; F:metalloendopeptidase activity
A0A023FRJ8	Uncharacterized protein	Amblyomma cajennense PE	173	19.0864	5.12256	1	1	2	2	0	0	0	0	2.25842	14.45	2	2	0	0	0	0	0	0	0	0	0	0	0	0	0	0	0	0	0.666667	0	0	#NUM!	≥ 0.05	-
A0A023FRL9	Putative salivary gland metalloprotease (Fragment)	Amblyomma cajennense PE	523	60.0683	6.90283	4	1	6	8	0	0	0	0	0	8.99	4	5	0	0	0	0	0	3.06	1	1	0	0	0	0	0	0	0	0	1.66667	0.333333	0.2	-2.32193	≥ 0.05	P:proteolysis; F:metallopeptidase activity; F:peptidase activity; F:metalloendopeptidase activity
A0A023FRM2	Putative ubiquitin-specific protease	Amblyomma cajennense PE	188	20.4203	4.86865	1	2	10	25	0	0	0	0	9.24773	12.77	2	5	1.8929	17.55	2	2	2.48919	26.6	3	3	5.26565	13.83	2	3	7.04594	20.21	5	7	2.33333	4.33333	1.85714	0.893085	≥ 0.05	P:proteolysis; F:peptidase activity
A0A023FRN0	Putative ran-specific gtpase-activating protein	Amblyomma cajennense PE	229	25.7818	4.99561	2	3	12	16	0	21.83	4	4	0	0	0	0	0	18.78	3	3	0	0	0	0	0	10.48	2	2	0	0	0	0	2.33333	0.666667	0.285714	-1.80735	≥ 0.05	P:intracellular transport; C:intracellular
A0A023FRN9	Putative evasin 1	Amblyomma cajennense PE	136	14.8573	8.04541	1	2	5	20	0	0	0	0	1.76911	26.47	2	5	0	0	0	0	1.7138	19.85	2	3	6.80341	11.76	2	5	0	11.76	1	3	1.66667	3.66667	2.2	1.1375	≥ 0.05	-
A0A023FRP8	Putative lipocalin-3 1	Amblyomma cajennense PE	211	23.7979	8.1626	1	2	9	52	2.13931	12.32	3	8	0	23.7	4	5	0	11.85	3	10	0	10.43	2	7	0	10.43	3	8	2.24698	15.17	3	7	7.66667	7.33333	0.956522	-0.0641303	≥ 0.05	-
A0A023FRQ2	Putative interferon alpha-inducible protein	Amblyomma cajennense PE	177	16.0955	9.45166	1	1	2	3	0	0	0	0	0	0	0	0	0	0	0	0	0	15.82	2	3	0	0	0	0	0	0	0	0	0	1	#DIV/0!	#DIV/0!	≥ 0.05	C:integral component of membrane
A0A023FRS5	Putative nucleoside diphosphate-sugar hydrolase of the mutt nudix family	Amblyomma cajennense PE	246	27.5107	7.00537	1	3	7	16	0	0	0	0	0	0	0	0	0	15.04	2	2	0	8.94	3	4	0	0	0	0	3.98243	20.33	5	8	0.666667	4	6	2.58496	≥ 0.05	F:hydrolase activity; P:metabolic process
A0A023FRT0	Uncharacterized protein (Fragment)	Amblyomma cajennense PE	212	23.6592	10.5942	2	2	10	21	1.68015	19.81	3	4	0	0	0	0	2.23678	27.36	4	5	3.88185	9.43	2	3	1.92807	12.74	2	2	2.11829	21.7	3	3	3	2.66667	0.888889	-0.169925	≥ 0.05	P:vesicle-mediated transport; C:membrane
A0A023FRT8	Uncharacterized protein	Amblyomma cajennense PE	216	24.7317	7.72314	2	1	5	11	0	15.74	2	3	0	0	0	0	0	6.02	1	1	1.61374	12.96	2	2	0	0	0	0	0	18.98	2	2	1.33333	1.33333	1	0	≥ 0.05	-
A0A023FRU1	Putative ferredoxin/adrenodoxin reductase (Fragment)	Amblyomma parvum PE	242	26.7601	8.98291	1	3	13	22	0	23.14	4	4	0	24.79	4	4	0	0	0	0	1.68863	21.9	4	4	1.69995	13.22	3	4	2.12696	7.85	1	1	2.66667	3	1.125	0.169925	≥ 0.05	-
A0A023FRU3	Putative ribosomal protein	Amblyomma cajennense PE	217	23.6904	9.83252	1	0	11	16	0	0	0	0	0	29.95	5	5	0	32.72	5	5	2.25982	17.97	3	3	0	0	0	0	0	0	0	0	3.33333	1	0.3	-1.73697	≥ 0.05	F:structural constituent of ribosome; P:translation; C:ribosome
A0A023FRW2	Putative lipocalin-3 1	Amblyomma cajennense PE	192	21.867	5.43994	1	2	3	13	0	0	0	0	3.58503	6.25	1	2	3.28151	15.1	2	4	1.68813	14.58	2	3	0	0	0	0	0	0	0	0	2	1	0.5	-1	≥ 0.05	-
A0A023FRW8	Uncharacterized protein	Amblyomma parvum PE	290	33.294	5.36377	1	2	7	8	2.11295	20.69	3	3	0	0	0	0	1.65252	16.21	4	4	0	0	0	0	0	0	0	0	0	0	0	0	2.33333	0	0	#NUM!	≥ 0.05	-
A0A023FRX5	Putative m13 family peptidase (Fragment)	Amblyomma cajennense PE	259	30.5423	8.17725	1	1	3	3	0	0	0	0	0	0	0	0	0	0	0	0	0	8.11	2	2	1.63842	4.63	1	1	0	0	0	0	0	1	#DIV/0!	#DIV/0!	≥ 0.05	P:proteolysis
A0A023FRX8	Putative tick metalloprotease 16 (Fragment)	Amblyomma cajennense PE	261	29.3311	7.92822	1	3	10	13	0	16.86	6	6	0	0	0	0	0	0	0	0	0	0	0	0	0	8.43	2	2	1.74568	15.33	4	4	2	2	1	0	≥ 0.05	P:proteolysis; F:metallopeptidase activity; F:peptidase activity; F:metalloendopeptidase activity
A0A023FRY2	Putative growth arrest and dna-damage-inducible protein-interacting protein 1	Amblyomma cajennense PE	263	29.8573	8.99756	1	1	12	36	0	22.05	5	6	1.65851	15.59	3	4	0	20.53	4	5	1.72795	23.57	5	6	1.65351	24.33	4	5	0	9.89	3	5	5	5.33333	1.06667	0.0931094	≥ 0.05	P:cell cycle; C:nucleus
A0A023FRZ0	Enolase (Fragment)	Amblyomma cajennense PE	246	26.0986	9.24658	1	4	9	14	2.83784	4.07	1	1	0	0	0	0	2.57136	26.02	5	5	2.75055	13.01	3	3	2.26844	4.07	1	1	2.50673	4.07	1	1	2	1.66667	0.833333	-0.263034	≥ 0.05	C:phosphopyruvate hydratase complex; F:phosphopyruvate hydratase activity; F:magnesium ion binding; P:glycolytic process; F:lyase activity
A0A023FRZ3	Putative tick kunitz 94	Amblyomma cajennense PE	198	22.3512	8.35303	1	4	7	15	2.01387	36.36	4	4	0	0	0	0	0	13.64	1	2	0	0	0	0	2.02044	34.85	3	3	0	0	0	0	2	1	0.5	-1	≥ 0.05	P:negative regulation of endopeptidase activity; F:serine-type endopeptidase inhibitor activity
A0A023FS11	Putative lipocalin-3 1	Amblyomma cajennense PE	203	23.8141	9.24658	2	2	4	5	0	0	0	0	0	0	0	0	0	0	0	0	0	0	0	0	0	10.84	2	2	0	0	0	0	0	0.666667	#DIV/0!	#DIV/0!	≥ 0.05	-
A0A023FS16	Uncharacterized protein	Amblyomma parvum PE	435	48.8715	9.75928	1	5	18	26	0	17.7	8	10	0	21.61	9	9	1.64734	5.29	2	2	1.8537	5.98	2	2	0	0	0	0	0	7.36	3	3	7	1.66667	0.238095	-2.07039	≥ 0.05	-
A0A023FS22	Putative 28s ribosomal protein	Amblyomma cajennense PE	316	36.8752	9.77393	1	3	10	11	0	0	0	0	1.64008	9.81	3	3	0	16.14	4	4	0	6.33	2	2	0	5.38	1	1	0	0	0	0	2.33333	1	0.428571	-1.22239	≥ 0.05	F:structural constituent of ribosome; P:translation; C:ribosome; C:intracellular
A0A023FS25	Putative alternative splicing factor srp55/b52/srp75 ixodes scapularis alternative splicing factor (Fragment)	Amblyomma parvum PE	466	53.1122	12.0151	1	2	10	14	0	0	0	0	0	3	1	1	0	8.37	3	4	0	0	0	0	1.6721	2.36	1	1	0	0	0	0	1.66667	0.333333	0.2	-2.32193	≥ 0.05	F:nucleic acid binding; F:nucleotide binding
A0A023FS32	Putative pyridoxal/pyridoxine/pyridoxamine kinase (Fragment)	Amblyomma cajennense PE	333	36.3833	7.51807	3	2	6	9	0	0	0	0	0	0	0	0	0	0	0	0	0	0	0	0	2.1595	13.21	4	4	2.42638	14.41	4	4	0	2.66667	#DIV/0!	#DIV/0!	≥ 0.05	F:kinase activity; F:pyridoxal kinase activity; P:phosphorylation; P:pyridoxal 5'-phosphate salvage
A0A023FS33	Putative tick til 23	Amblyomma cajennense PE	208	23.2702	8.70459	1	1	13	16	0	0	0	0	0	18.75	4	4	0	0	0	0	0	30.29	4	6	0	0	0	0	1.61089	23.08	3	3	1.33333	3	2.25	1.16993	≥ 0.05	-
A0A023FS43	Putative pre-mrna-splicing factor spf27	Amblyomma cajennense PE	262	30.468	4.86865	1	1	6	12	3.72894	17.94	3	4	0	0	0	0	0	0	0	0	1.85512	5.34	1	1	2.02229	5.34	1	1	0	5.34	1	1	1.33333	1	0.75	-0.415037	≥ 0.05	P:mRNA processing
A0A023FS46	Uncharacterized protein	Amblyomma cajennense PE	344	38.4306	5.43994	1	1	5	5	0	0	0	0	0	0	0	0	0	0	0	0	0	0	0	0	0	0	0	0	1.62421	15.41	3	3	0	1	#DIV/0!	#DIV/0!	≥ 0.05	-
A0A023FS52	Putative secreted protein	Amblyomma cajennense PE	216	23.671	7.23975	2	1	11	15	0	0	0	0	0	15.74	2	2	0	25.46	4	4	0	0	0	0	0	27.31	3	3	0	0	0	0	2	1	0.5	-1	≥ 0.05	-
A0A023FS68	Putative helix loop helix transcription factor (Fragment)	Amblyomma cajennense PE	384	41.2576	8.95361	1	4	12	30	0	0	0	0	2.56051	4.69	1	3	2.38909	13.8	3	6	4.4258	19.01	5	5	4.52755	8.85	4	6	2.1823	9.38	3	3	3	4.66667	1.55556	0.63743	≥ 0.05	F:protein dimerization activity
A0A023FS82	Uncharacterized protein (Fragment)	Amblyomma cajennense PE	292	31.5256	5.32568	1	1	7	10	0	7.88	2	2	0	0	0	0	1.76073	3.42	1	1	0	11.64	2	2	0	8.9	2	2	1.89747	2.74	1	1	1	1.66667	1.66667	0.736966	≥ 0.05	-
A0A023FS83	Putative cytochrome oxid	Amblyomma cajennense PE	432	47.4871	9.77393	1	1	13	22	0	9.95	3	3	0	0	0	0	0	16.2	6	7	2.17511	4.86	2	3	0	0	0	0	0	6.48	2	2	3.33333	1.66667	0.5	-1	≥ 0.05	C:integral component of membrane; P:protein insertion into membrane; C:membrane
A0A023FS87	Putative 26s proteasome regulatory complex subunit rpn2/psmd1	Amblyomma cajennense PE	297	32.9983	10.4038	1	1	3	5	0	0	0	0	2.1166	9.09	2	3	0	0	0	0	0	0	0	0	0	0	0	0	0	5.05	1	1	1	0.333333	0.333333	-1.58496	≥ 0.05	C:proteasome complex
A0A023FS98	Putative tick metalloprotease 23 (Fragment)	Amblyomma cajennense PE	460	51.2742	7.29834	1	5	12	19	0	6.3	3	3	0	18.04	6	6	2.03861	9.13	3	6	0	7.83	2	2	0	0	0	0	2.18053	7.39	2	2	5	1.33333	0.266667	-1.90689	≥ 0.05	P:proteolysis; F:metallopeptidase activity; F:peptidase activity; F:metalloendopeptidase activity
A0A023FSA1	Putative serine carboxypeptidase lysosomal cathepsin a (Fragment)	Amblyomma cajennense PE	311	34.4953	5.8208	1	2	4	10	0	0	0	0	0	0	0	0	0	2.25	1	1	0	5.47	2	2	0	9.65	3	3	0	5.47	2	2	0.333333	2.33333	7	2.80735	≥ 0.05	P:proteolysis; F:carboxypeptidase activity; F:serine-type carboxypeptidase activity
A0A023FSA4	Putative monocarboxylate transporter ixodes scapularis monocarboxylate transporter	Amblyomma cajennense PE	467	50.4721	8.29443	1	1	9	12	0	0	0	0	1.60038	2.57	1	1	0	0	0	0	0	16.27	5	5	0	0	0	0	3.42501	7.92	4	4	0.333333	3	9	3.16993	≥ 0.05	C:integral component of membrane; P:transmembrane transport
A0A023FSB2	Uncharacterized protein (Fragment)	Amblyomma cajennense PE	507	57.2188	8.60205	1	3	8	9	0	0	0	0	0	4.93	2	2	0	0	0	0	0	0	0	0	0	0	0	0	0	7.3	3	3	0.666667	1	1.5	0.584963	≥ 0.05	-
A0A023FSB4	Putative vesicle coat protein clathrin heavy chain (Fragment)	Amblyomma parvum PE	1492	171.038	5.65576	3	1	22	39	0	3.75	5	7	0	0	0	0	0	5.5	7	7	3.23219	7.37	9	10	0	0	0	0	1.73722	4.16	7	9	4.66667	6.33333	1.35714	0.440573	≥ 0.05	C:viral capsid; F:protein kinase activity; C:clathrin coat of coated pit; P:protein phosphorylation; F:ATP binding; C:clathrin coat of trans-Golgi network vesicle; P:intracellular protein transport; P:vesicle-mediated transport; F:structural molecule activity
A0A023FSB7	Putative lipocalin-6 1 (Fragment)	Amblyomma cajennense PE	235	26.292	7.40088	1	2	3	3	0	0	0	0	0	0	0	0	0	0	0	0	0	10.64	2	2	0	0	0	0	0	0	0	0	0	0.666667	#DIV/0!	#DIV/0!	≥ 0.05	-
A0A023FSC0	Uncharacterized protein (Fragment)	Amblyomma cajennense PE	333	37.463	4.57666	1	1	4	5	0	0	0	0	0	0	0	0	0	0	0	0	0	0	0	0	0	0	0	0	0	6.31	2	2	0	0.666667	#DIV/0!	#DIV/0!	≥ 0.05	-
A0A023FSC5	Putative cdk activating kin (Fragment)	Amblyomma cajennense PE	339	39.7415	9.64209	2	1	13	28	0	13.86	4	5	0	17.4	4	6	0	15.34	4	7	3.68394	8.26	3	4	0	0	0	0	0	0	0	0	6	1.33333	0.222222	-2.16993	≥ 0.05	F:protein kinase binding; P:regulation of transcription, DNA-templated; F:cyclin-dependent protein serine/threonine kinase regulator activity; P:transcription, DNA-templated; P:regulation of cyclin-dependent protein serine/threonine kinase activity; C:TFIIK complex
A0A023FSC8	Putative conserved plasma membrane protein (Fragment)	Amblyomma cajennense PE	340	38.2098	8.86572	1	3	8	11	0	0	0	0	0	4.71	1	1	0	21.47	3	4	0	0	0	0	0	0	0	0	0	16.47	3	4	1.66667	1.33333	0.8	-0.321928	≥ 0.05	C:integral component of membrane; C:membrane; P:transport
A0A023FSD5	Putative conserved plasma membrane protein (Fragment)	Amblyomma parvum PE	266	28.9495	8.30908	1	1	3	3	0	0	0	0	0	0	0	0	0	0	0	0	0	0	0	0	0	0	0	0	0	18.42	3	3	0	1	#DIV/0!	#DIV/0!	≥ 0.05	-
A0A023FSD9	Uncharacterized protein (Fragment)	Amblyomma parvum PE	289	32.6638	7.47412	1	1	2	2	0	0	0	0	0	0	0	0	0	0	0	0	0	19.38	2	2	0	0	0	0	0	0	0	0	0	0.666667	#DIV/0!	#DIV/0!	≥ 0.05	-
A0A023FSE1	Putative lipocalin-3 1 (Fragment)	Amblyomma cajennense PE	253	28.8146	7.43018	1	2	12	40	0	0	0	0	0	26.48	5	6	1.60747	19.76	5	6	0	0	0	0	1.89326	15.81	3	8	0	8.3	2	4	4	4	1	0	≥ 0.05	-
A0A023FSE4	Putative conserved secreted protein (Fragment)	Amblyomma parvum PE	324	36.0416	7.23975	1	8	10	24	0	0	0	0	0	6.48	1	1	6.45167	22.22	4	5	2.16941	20.99	5	5	0	16.67	4	5	0	3.7	1	2	2	4	2	1	≥ 0.05	F:metal ion binding; P:oxidation-reduction process; P:nitrate assimilation; F:heme binding; F:oxidoreductase activity
A0A023FSF4	Putative spou rrna methylase family protein	Amblyomma parvum PE	242	26.1207	4.83057	1	1	4	5	1.60017	9.5	2	3	0	0	0	0	0	0	0	0	0	0	0	0	0	0	0	0	0	0	0	0	1	0	0	#NUM!	≥ 0.05	F:RNA binding; F:methyltransferase activity; P:RNA methylation; P:RNA processing; P:methylation; F:RNA methyltransferase activity
A0A023FSF9	Putative monocarboxylate transporter ixodes scapularis monocarboxylate transporter	Amblyomma parvum PE	253	27.0162	9.46631	1	1	4	5	0	0	0	0	0	0	0	0	0	0	0	0	0	15.81	3	3	0	0	0	0	0	11.86	2	2	0	1.66667	#DIV/0!	#DIV/0!	≥ 0.05	C:integral component of membrane; P:transmembrane transport
A0A023FSG2	Putative outcast ele5 orf1-h 1e-40-j 4 (Fragment)	Amblyomma parvum PE	695	77.4778	10.5796	1	13	28	41	0	8.63	4	4	0	0	0	0	0	16.4	9	10	1.91065	9.78	6	6	1.7474	16.69	9	10	1.78185	13.24	8	8	4.66667	8	1.71429	0.777608	≥ 0.05	F:nucleic acid binding; P:RNA phosphodiester bond hydrolysis, endonucleolytic; F:RNA-DNA hybrid ribonuclease activity
A0A023FSG5	Putative tick til 11	Amblyomma cajennense PE	98	10.9405	10.1401	1	3	6	11	0	30.61	2	2	0	0	0	0	0	26.53	1	1	0	0	0	0	0	35.71	4	4	0	0	0	0	1	1.33333	1.33333	0.415037	≥ 0.05	-
A0A023FSH5	Putative acid sphingomyelinase ixodes scapularis acid sphingomyelinase	Amblyomma cajennense PE	446	49.3335	7.13721	1	2	7	13	1.97259	8.97	3	3	0	0	0	0	0	0	0	0	0	2.69	1	1	0	6.95	3	4	0	0	0	0	1	1.66667	1.66667	0.736966	≥ 0.05	F:hydrolase activity; P:metabolic process
A0A023FSI0	Putative secreted protein	Amblyomma parvum PE	72	7.68091	4.77979	1	2	4	9	2.05068	37.5	1	1	2.05714	27.78	1	2	0	0	0	0	3.19883	33.33	2	2	0	0	0	0	3.07354	40.28	2	3	1	1.66667	1.66667	0.736966	≥ 0.05	-
A0A023FSI4	Putative flavonol reductase/cinnamoyl-coa reductase	Amblyomma cajennense PE	463	50.7102	5.31299	1	1	24	48	8.01765	20.73	6	7	0	0	0	0	8.2746	13.39	5	7	9.30195	22.46	9	9	8.7839	28.08	11	11	7.97023	14.69	5	5	4.66667	8.33333	1.78571	0.836501	≥ 0.05	P:metabolic process; F:catalytic activity; F:coenzyme binding
A0A023FSK2	Putative translation initiation factor if-2 (Fragment)	Amblyomma cajennense PE	563	58.8469	10.7993	1	1	18	35	0	6.57	3	3	1.53932	15.1	5	5	1.51458	14.56	5	5	1.46275	15.1	6	8	2.05628	3.73	1	2	1.51776	6.04	2	4	4.33333	4.66667	1.07692	0.106915	≥ 0.05	P:translational initiation; F:translation initiation factor activity
A0A023FSL2	Putative mucolipin-3	Amblyomma cajennense PE	625	71.9688	8.33838	1	2	12	25	0	0	0	0	0	4	2	2	2.28607	7.68	5	5	0	9.44	5	5	3.54374	6.24	4	4	0	6.4	2	3	2.33333	4	1.71429	0.777608	≥ 0.05	-
A0A023FSL5	Putative conserved plasma membrane protein	Amblyomma parvum PE	347	41.2823	8.33838	2	1	4	7	0	0	0	0	0	0	0	0	1.82451	6.05	2	2	0	0	0	0	0	6.92	2	2	1.82544	10.37	2	3	0.666667	1.66667	2.5	1.32193	≥ 0.05	C:integral component of membrane
A0A023FSL6	Protein-tyrosine sulfotransferase	Amblyomma cajennense PE	385	43.868	9.34912	4	6	13	14	0	13.77	3	3	0	0	0	0	0	8.05	2	2	0	7.53	3	3	0	0	0	0	0	19.74	5	6	1.66667	3	1.8	0.847997	≥ 0.05	F:transferase activity; F:protein-tyrosine sulfotransferase activity; P:peptidyl-tyrosine sulfation
A0A023FSL8	Putative secreted protein (Fragment)	Amblyomma parvum PE	171	18.9433	8.45557	1	2	4	8	0	21.64	2	2	0	0	0	0	0	0	0	0	0	5.85	1	1	1.70822	3.51	1	2	0	15.79	2	2	0.666667	1.66667	2.5	1.32193	≥ 0.05	-
A0A023FSM3	Uncharacterized protein	Amblyomma cajennense PE	108	11.9736	6.84424	13	2	3	5	0	0	0	0	0	0	0	0	0	0	0	0	0	0	0	0	0	48.15	2	2	0	0	0	0	0	0.666667	#DIV/0!	#DIV/0!	≥ 0.05	-
A0A023FSM8	Putative scaffold/matrix specific factor hnrnp-u/saf-a (Fragment)	Amblyomma parvum PE	367	41.4479	8.26514	1	3	16	31	1.63893	22.07	6	7	0	0	0	0	0	0	0	0	0	13.62	4	5	1.7835	13.35	6	7	0	10.63	4	6	2.33333	6	2.57143	1.36257	≥ 0.05	-
A0A023FSN9	Putative secreted protein	Amblyomma cajennense PE	459	52.174	7.18115	1	1	7	10	0	0	0	0	0	0	0	0	0	0	0	0	1.79525	8.28	4	5	0	0	0	0	0	4.36	1	1	0	2	#DIV/0!	#DIV/0!	≥ 0.05	-
A0A023FSP1	Putative u1 snrnp complex subunit snu71	Amblyomma parvum PE	378	42.0231	9.51025	2	1	8	16	3.77012	8.99	2	2	1.70691	8.2	4	4	1.87413	10.85	2	3	1.78724	5.82	2	2	0	8.73	3	5	0	0	0	0	3	2.33333	0.777778	-0.36257	≥ 0.05	F:nucleic acid binding; F:nucleotide binding
A0A023FSQ4	Putative 26s proteasome regulatory complex subunit	Amblyomma parvum PE	410	44.2911	4.86865	1	2	6	7	0	0	0	0	0	0	0	0	2.01388	16.83	4	4	0	0	0	0	0	0	0	0	0	0	0	0	1.33333	0	0	#NUM!	≥ 0.05	C:proteasome regulatory particle, base subcomplex; C:proteasome complex; P:ubiquitin-dependent protein catabolic process
A0A023FSQ7	Putative tick metalloprotease 1	Amblyomma cajennense PE	511	58.3012	7.03467	1	1	13	16	0	0	0	0	1.69818	10.76	5	5	1.68282	11.35	5	6	0	0	0	0	1.74798	9.98	4	4	0	0	0	0	3.66667	1.33333	0.363636	-1.45943	≥ 0.05	P:proteolysis; F:metallopeptidase activity; F:peptidase activity; F:metalloendopeptidase activity
A0A023FSQ8	Putative caatt-binding transcription factor/60s ribosomal subunit bioproteinsis protein (Fragment)	Amblyomma parvum PE	422	48.2446	9.20264	1	1	14	27	0	4.98	2	2	0	9.72	4	6	0	0	0	0	0	17.54	5	6	1.95572	15.4	5	5	0	0	0	0	2.66667	3.66667	1.375	0.459432	≥ 0.05	-
A0A023FSR7	Putative wd40-repeat-containing subunit of the 18s rrna processing complex (Fragment)	Amblyomma parvum PE	453	49.1132	5.30029	1	1	5	6	0	0	0	0	0	5.96	2	2	0	3.09	1	1	0	0	0	0	0	4.42	2	2	0	0	0	0	1	0.666667	0.666667	-0.584963	≥ 0.05	-
A0A023FSW1	Putative vesicle coat complex copii subunit sec24/subunit sfb2 (Fragment)	Amblyomma parvum PE	1148	123.399	7.41553	1	1	10	12	0	0	0	0	0	3.92	4	4	0	0	0	0	0	5.14	4	4	0	4.09	3	3	0	1.22	1	1	1.33333	2.66667	2	1	≥ 0.05	C:COPII vesicle coat; P:ER to Golgi vesicle-mediated transport; F:zinc ion binding; P:intracellular protein transport; P:protein transport; P:transport
A0A023FSX2	Putative disrupter of silencing sas10 (Fragment)	Amblyomma parvum PE	348	39.3359	5.021	1	1	4	5	0	9.2	2	2	2.14532	5.17	1	1	0	0	0	0	0	0	0	0	0	0	0	0	0	10.63	2	2	1	0.666667	0.666667	-0.584963	≥ 0.05	-
A0A023FSY3	Putative tick metalloprotease 1	Amblyomma cajennense PE	558	63.2681	6.55127	1	1	5	7	1.73423	4.3	2	2	0	0	0	0	1.71452	2.69	2	2	0	0	0	0	0	0	0	0	1.84	1.61	1	1	1.33333	0.333333	0.25	-2	≥ 0.05	P:proteolysis; F:metallopeptidase activity; F:peptidase activity; F:metalloendopeptidase activity
A0A023FSY6	Uncharacterized protein (Fragment)	Amblyomma cajennense PE	110	12.0719	4.98291	1	1	2	2	0	0	0	0	0	0	0	0	0	0	0	0	0	0	0	0	0	0	0	0	0	30.91	2	2	0	0.666667	#DIV/0!	#DIV/0!	≥ 0.05	-
A0A023FSY9	Putative ski oncoprotein (Fragment)	Amblyomma cajennense PE	513	55.6535	7.29834	1	5	15	20	2.01195	17.74	5	5	0	2.34	1	1	0	0	0	0	6.10174	20.27	8	8	1.60571	4.29	3	3	0	0	0	0	2	3.66667	1.83333	0.874469	≥ 0.05	F:SMAD binding
A0A023FSZ3	Putative secreted protease inhibitor	Amblyomma cajennense PE	129	14.6169	4.83057	2	1	4	10	0	0	0	0	2.24221	27.91	2	2	0	0	0	0	0	19.38	1	1	0	0	0	0	0	19.38	1	2	0.666667	1	1.5	0.584963	≥ 0.05	P:proteolysis; P:negative regulation of endopeptidase activity; F:peptidase activity; F:serine-type endopeptidase inhibitor activity
A0A023FSZ9	Putative growth arrest and dna-damage-inducible protein-interacting protein 1 (Fragment)	Amblyomma parvum PE	268	30.5735	8.41162	1	2	11	22	2.04456	16.42	3	3	0	0	0	0	0	18.66	4	4	3.67428	16.79	4	4	2.16454	28.73	5	5	0	11.19	2	2	2.33333	3.66667	1.57143	0.652077	≥ 0.05	P:cell cycle; C:nucleus
A0A023FT03	Putative kunitz-type peptidase inhibitor	Amblyomma cajennense PE	156	18.3561	9.31982	1	2	3	4	0	0	0	0	0	0	0	0	0	21.15	2	2	0	21.15	2	2	0	0	0	0	0	0	0	0	0.666667	0.666667	1	0	≥ 0.05	P:negative regulation of endopeptidase activity; F:serine-type endopeptidase inhibitor activity
A0A023FT04	Putative lipocalin-3 1	Amblyomma cajennense PE	203	24.032	9.29053	1	2	7	10	0	13.3	2	2	0	0	0	0	1.61937	9.85	2	2	0	9.85	2	2	0	0	0	0	1.88579	24.14	4	4	1.33333	2	1.5	0.584963	≥ 0.05	-
A0A023FT15	Putative complexin	Amblyomma parvum PE	142	16.2422	5.2749	3	3	9	36	5.50731	14.08	2	3	2.9039	19.72	3	4	0	14.08	2	5	5.23427	15.49	2	6	0	14.08	2	5	1.68514	42.96	5	8	4	6.33333	1.58333	0.662965	≥ 0.05	F:syntaxin binding; P:neurotransmitter transport
A0A023FT20	Putative secreted protein (Fragment)	Amblyomma cajennense PE	135	15.3416	8.71924	1	1	4	4	0	0	0	0	0	0	0	0	0	0	0	0	2.04904	10.37	1	1	1.77727	20	3	3	0	0	0	0	0	1.33333	#DIV/0!	#DIV/0!	≥ 0.05	P:negative regulation of endopeptidase activity; F:serine-type endopeptidase inhibitor activity
A0A023FT22	Putative transcriptional regulatory protein (Fragment)	Amblyomma parvum PE	914	96.0493	4.75439	1	2	10	12	0	0	0	0	0	0	0	0	0	6.13	4	4	0	6.67	4	4	0	0	0	0	1.66984	5.47	4	4	1.33333	2.66667	2	1	≥ 0.05	-
A0A023FT24	Putative evasin 1	Amblyomma cajennense PE	136	15.4664	8.67529	1	1	3	7	0	0	0	0	0	26.47	3	3	0	0	0	0	0	19.85	2	3	0	8.09	1	1	0	0	0	0	1	1.33333	1.33333	0.415037	≥ 0.05	-
A0A023FT25	Putative trilaris (Fragment)	Amblyomma parvum PE	237	26.2405	8.74854	3	1	7	7	0	0	0	0	1.61794	21.94	4	4	0	10.55	1	1	0	0	0	0	0	12.66	2	2	0	0	0	0	1.66667	0.666667	0.4	-1.32193	≥ 0.05	P:negative regulation of endopeptidase activity; F:serine-type endopeptidase inhibitor activity
A0A023FT29	Putative geranylgeranyl pyrophosphate synthase/polyprenyl synthetase (Fragment)	Amblyomma parvum PE	417	45.8523	8.03076	1	1	10	18	0	0	0	0	0	5.52	2	2	2.13858	8.87	3	3	0	9.35	3	3	0	10.31	4	4	2.63485	10.07	4	4	1.66667	3.66667	2.2	1.1375	≥ 0.05	P:isoprenoid biosynthetic process; F:transferase activity
A0A023FT41	Putative la rna-binding domain of la-related protein 7 (Fragment)	Amblyomma parvum PE	237	27.3943	8.99756	1	1	4	6	0	0	0	0	0	0	0	0	0	0	0	0	0	8.02	1	1	0	0	0	0	2.16231	22.36	4	5	0	2	#DIV/0!	#DIV/0!	≥ 0.05	F:RNA binding; F:nucleic acid binding; F:nucleotide binding; C:ribonucleoprotein complex; P:RNA processing; C:nucleus
A0A023FT42	Putative secreted protein	Amblyomma parvum PE	131	15.1697	9.56885	1	2	10	26	4.86991	12.98	3	4	2.8155	17.56	3	3	2.09498	25.19	2	3	0	0	0	0	2.10921	45.8	5	5	2.23408	25.19	2	2	3.33333	2.33333	0.7	-0.514573	≥ 0.05	-
A0A023FT81	Putative domon domain of stromal cell-derived receptor 2 (Fragment)	Amblyomma parvum PE	319	34.1087	7.02002	1	1	4	12	0	9.09	3	4	0	0	0	0	1.82908	8.46	2	4	0	8.46	2	3	0	0	0	0	0	3.76	1	1	2.66667	1.33333	0.5	-1	≥ 0.05	-
A0A023FT84	Putative ring finger protein 25 (Fragment)	Amblyomma parvum PE	326	36.5533	5.14795	1	1	5	5	0	6.13	1	1	0	0	0	0	1.66798	8.59	2	2	1.6031	2.45	1	1	0	0	0	0	0	0	0	0	1	0.333333	0.333333	-1.58496	≥ 0.05	F:metal ion binding; F:zinc ion binding
A0A023FT85	Putative kunitz domain protein	Amblyomma cajennense PE	158	17.8447	8.25049	1	1	4	4	0	0	0	0	0	0	0	0	0	0	0	0	0	0	0	0	0	0	0	0	0	29.75	3	3	0	1	#DIV/0!	#DIV/0!	≥ 0.05	P:negative regulation of endopeptidase activity; F:serine-type endopeptidase inhibitor activity
A0A023FT88	Putative hsc70-interacting protein (Fragment)	Amblyomma parvum PE	348	39.6277	5.03369	1	1	7	13	0	4.6	1	1	0	14.94	4	4	0	12.93	3	3	0	0	0	0	0	0	0	0	1.3299	6.61	2	2	2.66667	0.666667	0.25	-2	≥ 0.05	-
A0A023FTA5	Putative eukaryotic translation initiation factor 4b (Fragment)	Amblyomma parvum PE	398	44.5623	8.30908	2	7	12	15	1.61844	15.58	6	6	0	0	0	0	0	0	0	0	0	0	0	0	0	0	0	0	0	14.57	5	5	2	1.66667	0.833333	-0.263034	≥ 0.05	P:translational initiation; F:translation initiation factor activity
A0A023FTB1	Putative ribosomal protein (Fragment)	Amblyomma parvum PE	463	51.7176	11.0044	2	1	19	39	3.7664	20.3	9	9	3.67216	14.69	6	7	2.24545	16.2	7	8	0	6.48	3	4	0	0	0	0	0	6.05	2	3	8	2.33333	0.291667	-1.77761	≥ 0.05	F:structural constituent of ribosome; P:translation; C:ribosome
A0A023FTC0	Putative atp-dependent rna helicase (Fragment)	Amblyomma parvum PE	515	57.4047	7.53271	1	1	11	16	0	0	0	0	0	19.42	6	6	0	9.13	3	3	0	6.41	3	3	0	0	0	0	0	0	0	0	3	1	0.333333	-1.58496	≥ 0.05	F:helicase activity; F:nucleic acid binding; F:ATP binding; F:hydrolase activity; P:metabolic process; F:nucleotide binding
A0A023FTC1	Putative acylphosphatase	Amblyomma parvum PE	90	10.1529	7.34229	1	1	4	6	2.10592	45.56	3	3	0	20	1	1	0	0	0	0	0	0	0	0	0	0	0	0	0	28.89	2	2	1.33333	0.666667	0.5	-1	≥ 0.05	-
A0A023FTC4	Putative udp-n-acetylglucosamine pyrophosphorylase	Amblyomma parvum PE	541	60.8657	6.40479	1	1	7	10	2.16789	7.21	2	2	0	0	0	0	0	0	0	0	2.02168	7.95	3	4	0	0	0	0	0	7.39	2	2	0.666667	2	3	1.58496	≥ 0.05	P:metabolic process; F:uridylyltransferase activity
A0A023FTC8	Histone H2A	Amblyomma parvum PE	141	14.7119	10.3159	3	2	7	14	5.83988	11.35	2	3	5.31328	31.91	3	4	3.17755	6.38	1	1	0	0	0	0	0	0	0	0	2.16847	19.15	4	4	2.66667	1.33333	0.5	-1	≥ 0.05	C:chromosome; C:nucleosome; F:protein heterodimerization activity; C:nucleus; F:DNA binding
A0A023FTC9	Putative membrane protein associated with esophageal cancer in s (Fragment)	Amblyomma parvum PE	589	66.6744	6.75635	1	3	17	31	3.82384	18.68	7	7	4.2319	9.68	4	5	2.00772	12.05	4	5	2.41155	6.62	3	3	2.27292	8.66	3	3	2.404	8.66	4	4	5.66667	3.33333	0.588235	-0.765535	≥ 0.05	-
A0A023FTD1	Putative mitochondrial ribosomal protein s6	Amblyomma parvum PE	142	16.2335	9.46631	2	3	10	16	0	48.59	4	5	0	0	0	0	0	8.45	1	2	0	14.79	2	2	0	16.9	2	3	0	0	0	0	2.33333	1.66667	0.714286	-0.485427	≥ 0.05	F:structural constituent of ribosome; P:translation; C:ribosome; F:rRNA binding
A0A023FTE7	Coatomer subunit alpha	Amblyomma parvum PE	1217	137.121	7.50342	1	1	26	39	0	11.01	7	7	0	3.7	3	3	0	10.68	8	9	1.3666	10.68	10	10	0	5.26	4	4	0	6.08	6	6	6.33333	6.66667	1.05263	0.0740006	≥ 0.05	P:protein transport; C:membrane; C:Golgi membrane; P:transport; C:cytoplasm; C:Golgi apparatus; C:COPI vesicle coat; P:intracellular protein transport; C:membrane coat; P:vesicle-mediated transport; F:structural molecule activity
A0A023FTF3	Putative thyropin	Amblyomma cajennense PE	166	18.6978	7.91357	1	2	4	5	0	0	0	0	0	11.45	1	1	0	0	0	0	0	0	0	0	0	0	0	0	0	27.11	3	3	0.333333	1	3	1.58496	≥ 0.05	-
A0A023FTG2	Putative plasma membrane glycoprotein cd36	Amblyomma parvum PE	243	27.2209	8.83643	1	1	2	2	0	0	0	0	1.70338	8.64	2	2	0	0	0	0	0	0	0	0	0	0	0	0	0	0	0	0	0.666667	0	0	#NUM!	≥ 0.05	C:integral component of membrane; P:cell adhesion; C:membrane
A0A023FTG6	Putative peptidyl-prolyl cis-trans isomerase (Fragment)	Amblyomma parvum PE	156	17.4229	9.12939	1	2	4	5	0	0	0	0	0	0	0	0	0	0	0	0	0	12.18	1	1	0	28.21	4	4	0	0	0	0	0	1.66667	#DIV/0!	#DIV/0!	≥ 0.05	F:peptidyl-prolyl cis-trans isomerase activity; P:metabolic process; P:protein peptidyl-prolyl isomerization; F:isomerase activity
A0A023FTG7	Putative extracellular matrix glycoprotein laminin subunit beta (Fragment)	Amblyomma parvum PE	356	40.4146	7.88428	1	2	7	7	0	0	0	0	0	0	0	0	0	0	0	0	0	0	0	0	1.733	11.52	3	3	0	0	0	0	0	1	#DIV/0!	#DIV/0!	≥ 0.05	-
A0A023FTI1	Putative adp-ribosylation factor-like protein 15	Amblyomma parvum PE	201	21.628	7.60596	2	1	3	3	0	0	0	0	0	0	0	0	0	0	0	0	0	16.92	3	3	0	0	0	0	0	0	0	0	0	1	#DIV/0!	#DIV/0!	≥ 0.05	F:GTP binding; P:small GTPase mediated signal transduction; F:nucleotide binding; C:intracellular
A0A023FTI4	Uncharacterized protein (Fragment)	Amblyomma parvum PE	160	16.7084	7.51807	1	4	5	6	0	0	0	0	0	0	0	0	0	0	0	0	1.6446	5.63	1	2	2.00571	20.63	2	2	0	0	0	0	0	1.33333	#DIV/0!	#DIV/0!	≥ 0.05	P:oxidation-reduction process; P:pyridine nucleotide biosynthetic process; F:oxidoreductase activity; P:NADP catabolic process
A0A023FTL6	Uncharacterized protein	Amblyomma cajennense PE	180	20.9823	7.43018	2	1	4	4	0	0	0	0	0	20.56	4	4	0	0	0	0	0	0	0	0	0	0	0	0	0	0	0	0	1.33333	0	0	#NUM!	≥ 0.05	-
A0A023FTM2	Putative kunitz-type serine protease inhibitor	Amblyomma cajennense PE	166	19.0732	8.82178	1	4	11	24	0	12.05	1	1	1.7562	21.69	4	4	1.6811	19.28	4	4	0	12.05	2	2	0	11.45	2	2	4.02346	28.92	4	5	3	3	1	0	≥ 0.05	P:proteolysis; P:negative regulation of endopeptidase activity; F:peptidase activity; F:serine-type endopeptidase inhibitor activity
A0A023FTM4	Putative thioredoxin-like protein (Fragment)	Amblyomma parvum PE	142	15.8961	5.64307	3	3	5	11	0	0	0	0	0	9.86	1	1	0	0	0	0	0	9.86	1	1	0	9.15	1	1	0	21.13	2	2	0.333333	1.33333	4	2	≥ 0.05	P:oxidation-reduction process; P:cell redox homeostasis; P:glycerol ether metabolic process; F:protein disulfide oxidoreductase activity; C:cell
A0A023FTM5	Putative secreted salivary gland peptide ixodes scapularis secreted salivary gland peptide	Amblyomma parvum PE	169	16.0486	8.99756	1	1	3	3	0	0	0	0	0	0	0	0	0	0	0	0	0	13.61	2	2	0	0	0	0	0	0	0	0	0	0.666667	#DIV/0!	#DIV/0!	≥ 0.05	-
A0A023FTP0	Putative phosphoribosylpyrophosphate synthetase-associated protein (Fragment)	Amblyomma parvum PE	130	14.3096	9.24658	1	5	9	13	0	33.85	2	2	1.73608	16.92	2	2	0	0	0	0	1.75999	33.08	3	4	0	33.08	3	3	0	0	0	0	1.33333	2.33333	1.75	0.807355	≥ 0.05	-
A0A023FTP2	Putative evasin 1	Amblyomma cajennense PE	173	18.7295	8.80713	1	1	5	5	0	0	0	0	0	0	0	0	0	0	0	0	0	10.98	1	1	0	0	0	0	1.69808	17.92	4	4	0	1.66667	#DIV/0!	#DIV/0!	≥ 0.05	-
A0A023FTP6	Uncharacterized protein (Fragment)	Amblyomma cajennense PE	186	21.6914	9.86182	1	2	3	9	2.25095	11.83	1	1	4.52174	11.83	1	2	2.34992	11.83	1	2	0	11.83	1	1	0	0	0	0	2.74669	27.96	3	3	1.66667	1.33333	0.8	-0.321928	≥ 0.05	-
A0A023FTP9	Putative carboxypeptidase inhibitor	Amblyomma parvum PE	103	11.4456	9.26123	1	1	6	12	0	33.01	2	3	0	0	0	0	0	0	0	0	0	0	0	0	0	9.71	2	3	0	0	0	0	1	1	1	0	≥ 0.05	F:metalloendopeptidase inhibitor activity; P:negative regulation of endopeptidase activity; P:blood coagulation
A0A023FTQ0	Putative secreted protein	Amblyomma cajennense PE	187	21.1295	8.68994	1	1	3	3	0	0	0	0	0	24.6	3	3	0	0	0	0	0	0	0	0	0	0	0	0	0	0	0	0	1	0	0	#NUM!	≥ 0.05	-
A0A023FTQ1	Uncharacterized protein	Amblyomma cajennense PE	174	20.0359	6.62451	1	1	3	3	0	0	0	0	0	10.34	1	1	0	0	0	0	0	0	0	0	0	0	0	0	0	11.49	2	2	0.333333	0.666667	2	1	≥ 0.05	-
A0A023FTR5	Putative secreted protein	Amblyomma cajennense PE	177	18.7307	6.354	1	2	2	2	0	16.95	2	2	0	0	0	0	0	0	0	0	0	0	0	0	0	0	0	0	0	0	0	0	0.666667	0	0	#NUM!	≥ 0.05	-
A0A023FTS0	Putative 26s proteasome subunit rpn7 (Fragment)	Amblyomma parvum PE	141	16.1162	5.03369	1	1	4	9	0	10.64	1	1	1.77124	5.67	1	2	1.74318	5.67	1	2	0	0	0	0	1.63273	23.4	3	3	0	0	0	0	1.66667	1	0.6	-0.736966	≥ 0.05	C:proteasome complex
A0A023FTS3	Putative secreted protein	Amblyomma cajennense PE	191	21.5306	8.55811	1	2	3	3	0	0	0	0	1.80456	22.51	2	2	0	0	0	0	1.78912	5.24	1	1	0	0	0	0	0	0	0	0	0.666667	0.333333	0.5	-1	≥ 0.05	-
A0A023FTU3	Putative lipocalin-6 1	Amblyomma parvum PE	203	23.5851	4.80518	1	1	2	2	0	0	0	0	0	0	0	0	0	17.73	2	2	0	0	0	0	0	0	0	0	0	0	0	0	0.666667	0	0	#NUM!	≥ 0.05	-
A0A023FTU7	Putative mitochondrial ribosomal protein l20	Amblyomma parvum PE	150	17.2201	10.4331	1	2	3	4	0	36.67	3	3	0	22.67	1	1	0	0	0	0	0	0	0	0	0	0	0	0	0	0	0	0	1.33333	0	0	#NUM!	≥ 0.05	F:structural constituent of ribosome; P:translation; C:ribonucleoprotein complex; C:ribosome; F:rRNA binding; C:intracellular
A0A023FTW6	Putative ribosomal protein s18	Amblyomma parvum PE	153	17.7968	10.7554	2	4	14	28	6.76732	25.49	5	5	7.28508	16.99	3	4	2.69867	17.65	3	3	0	24.84	3	3	0	18.95	4	5	0	0	0	0	4	2.66667	0.666667	-0.584963	≥ 0.05	F:structural constituent of ribosome; F:RNA binding; F:nucleic acid binding; P:translation; C:ribonucleoprotein complex; C:ribosome; C:intracellular
A0A023FTZ2	Putative lipocalin-3 1	Amblyomma cajennense PE	189	21.8427	4.91943	1	1	4	5	0	0	0	0	0	0	0	0	0	24.34	3	3	1.99212	4.23	1	1	0	0	0	0	0	0	0	0	1	0.333333	0.333333	-1.58496	≥ 0.05	-
A0A023FTZ4	Putative mitochondrial ribosomal protein l12 strongylocentrotus purpuratus	Amblyomma parvum PE	190	20.7778	8.22119	1	2	7	14	0	0	0	0	0	0	0	0	1.75161	13.68	2	3	1.83299	5.79	1	1	0	13.68	2	2	0	21.05	3	3	1	2	2	1	≥ 0.05	F:structural constituent of ribosome; P:translation; C:ribosome; C:intracellular
A0A023FU07	Putative secreted protein	Amblyomma cajennense PE	206	23.6016	6.97607	2	1	7	8	0	0	0	0	0	17.96	3	3	0	0	0	0	1.61608	11.65	2	2	1.66726	19.42	3	3	0	0	0	0	1	1.66667	1.66667	0.736966	≥ 0.05	-
A0A023FU10	Putative ribosomal protein l37a	Amblyomma parvum PE	92	10.3225	10.7261	1	1	3	4	0	0	0	0	0	0	0	0	0	0	0	0	0	0	0	0	0	0	0	0	0	14.13	2	2	0	0.666667	#DIV/0!	#DIV/0!	≥ 0.05	F:structural constituent of ribosome; P:translation; C:ribosome; C:intracellular
A0A023FU18	Putative peptide deformylase (Fragment)	Amblyomma parvum PE	193	21.9641	8.06006	1	2	7	8	1.78929	9.84	3	3	0	0	0	0	0	0	0	0	0	0	0	0	0	0	0	0	0	32.64	4	4	1	1.33333	1.33333	0.415037	≥ 0.05	F:peptide deformylase activity; P:metabolic process; F:iron ion binding
A0A023FU34	Uncharacterized protein	Amblyomma parvum PE	198	21.547	9.21729	1	1	5	6	0	8.59	2	2	0	27.27	3	3	0	0	0	0	0	0	0	0	0	0	0	0	0	7.07	1	1	1.66667	0.333333	0.2	-2.32193	≥ 0.05	-
A0A023FU35	Uncharacterized protein	Amblyomma cajennense PE	198	22.7584	8.44092	1	1	3	4	0	0	0	0	0	15.66	2	2	0	0	0	0	0	6.57	2	2	0	0	0	0	0	0	0	0	0.666667	0.666667	1	0	≥ 0.05	P:negative regulation of endopeptidase activity; F:serine-type endopeptidase inhibitor activity
A0A023FU43	Putative lipocalin	Amblyomma cajennense PE	201	22.8421	8.98291	1	1	5	5	0	0	0	0	0	5.97	1	1	0	0	0	0	0	0	0	0	0	0	0	0	0	38.81	4	4	0.333333	1.33333	4	2	≥ 0.05	-
A0A023FU65	Proteasome subunit beta type	Amblyomma parvum PE	202	22.5816	7.02002	3	1	10	12	0	0	0	0	0	6.93	2	2	0	7.43	1	1	0	0	0	0	0	7.43	2	2	0	36.14	3	4	1	2	2	1	≥ 0.05	P:proteolysis involved in cellular protein catabolic process; F:endopeptidase activity; F:hydrolase activity; C:nucleus; C:cytoplasm; F:threonine-type endopeptidase activity; C:proteasome core complex; C:proteasome complex; F:peptidase activity; P:proteolysis
A0A023FU78	Putative secreted protein	Amblyomma cajennense PE	222	24.7919	9.48096	1	1	6	12	1.80712	4.05	1	2	0	21.17	3	3	0	9.01	2	3	0	0	0	0	0	0	0	0	0	0	0	0	2.66667	0	0	#NUM!	≥ 0.05	-
A0A023FU84	Ribosomal protein L15	Amblyomma parvum PE	204	24.3771	11.3706	8	3	16	32	0	20.1	4	4	2.55589	20.59	4	4	1.62798	22.55	5	7	0	25.49	5	5	0	21.57	4	4	0	25.49	5	5	5	4.66667	0.933333	-0.0995357	≥ 0.05	F:structural constituent of ribosome; P:translation; C:ribonucleoprotein complex; C:ribosome; C:intracellular
A0A023FU86	Putative grpe protein 1 mitochondrial (Fragment)	Amblyomma parvum PE	177	19.9952	6.78564	2	4	10	42	0	14.12	2	2	2.14342	14.69	3	5	5.4926	35.59	5	7	3.39571	30.51	5	8	5.5216	19.21	4	6	2.37459	22.03	6	7	4.66667	7	1.5	0.584963	≥ 0.05	P:regulation of catalytic activity; P:protein folding; F:chaperone binding; F:adenyl-nucleotide exchange factor activity; F:protein homodimerization activity
A0A023FU88	Putative ribosomal protein l34	Amblyomma parvum PE	119	13.5727	11.3267	6	2	6	9	0	0	0	0	4.15123	22.69	4	5	0	0	0	0	0	0	0	0	0	0	0	0	0	0	0	0	1.66667	0	0	#NUM!	≥ 0.05	F:structural constituent of ribosome; P:translation; C:ribosome; C:intracellular
A0A023FU89	Putative licpodalin-4 1 (Fragment)	Amblyomma cajennense PE	226	25.6704	6.72705	2	3	7	13	3.74284	12.39	2	2	0	0	0	0	2.37468	20.8	3	4	0	0	0	0	2.34329	13.27	2	2	0	15.04	2	2	2	1.33333	0.666667	-0.584963	≥ 0.05	-
A0A023FU98	Putative epidermis development	Amblyomma parvum PE	181	20.5643	5.94775	1	1	5	5	0	0	0	0	0	45.3	5	5	0	0	0	0	0	0	0	0	0	0	0	0	0	0	0	0	1.66667	0	0	#NUM!	≥ 0.05	F:GTP binding; P:small GTPase mediated signal transduction; F:nucleotide binding; C:membrane; P:signal transduction; C:intracellular
A0A023FUA0	Putative glycine rich protein	Amblyomma parvum PE	120	12.5014	8.57275	1	1	6	8	0	0	0	0	0	26.67	2	2	0	0	0	0	0	0	0	0	0	0	0	0	0	0	0	0	0.666667	0	0	#NUM!	≥ 0.05	F:metal ion binding; F:nucleic acid binding; F:zinc ion binding
A0A023FUA2	Uncharacterized protein (Fragment)	Amblyomma cajennense PE	214	24.667	5.12256	1	1	6	8	0	0	0	0	0	16.82	2	2	0	0	0	0	0	0	0	0	0	23.83	3	4	0	9.35	1	1	0.666667	1.66667	2.5	1.32193	≥ 0.05	-
A0A023FUA7	Putative 26s proteasome regulatory complex atpase rpt4 (Fragment)	Amblyomma parvum PE	209	23.5022	5.74463	1	0	15	36	3.51491	12.44	3	3	7.42267	34.45	6	7	4.55676	15.79	3	4	2.24394	18.18	3	3	2.54875	23.44	3	5	4.24705	13.88	2	4	4.66667	4	0.857143	-0.222392	≥ 0.05	F:ATP binding; C:proteasome complex; F:nucleotide binding
A0A023FUB0	Uncharacterized protein	Amblyomma cajennense PE	217	25.3594	7.07861	1	8	9	20	0	26.27	3	3	0	17.51	2	2	0	16.13	2	3	0	17.51	2	3	0	6.45	1	1	0	20.74	2	3	2.66667	2.33333	0.875	-0.192645	≥ 0.05	-
A0A023FUC9	Putative conserved plasma membrane protein (Fragment)	Amblyomma parvum PE	126	14.1473	9.43701	4	1	2	5	0	8.73	1	1	0	8.73	1	1	0	0	0	0	0	0	0	0	0	0	0	0	0	30.16	2	3	0.666667	1	1.5	0.584963	≥ 0.05	-
A0A023FUD8	Putative secreted protein (Fragment)	Amblyomma cajennense PE	223	23.5281	9.12939	1	1	3	3	0	0	0	0	1.76373	4.93	1	1	0	16.59	2	2	0	0	0	0	0	0	0	0	0	0	0	0	1	0	0	#NUM!	≥ 0.05	-
A0A023FUE3	Putative secreted protein	Amblyomma cajennense PE	225	25.4242	9.72998	1	1	3	6	0	0	0	0	0	7.56	2	2	0	0	0	0	0	6.22	1	2	0	6.22	1	2	0	0	0	0	0.666667	1.33333	2	1	≥ 0.05	-
A0A023FUF9	Uncharacterized protein	Amblyomma parvum PE	194	22.2535	5.33838	2	3	9	28	0	0	0	0	0	10.82	2	6	0	22.68	3	7	0	21.65	4	4	0	0	0	0	0	0	0	0	4.33333	1.33333	0.307692	-1.70044	≥ 0.05	-
A0A023FUG8	Putative toll-like receptor 5	Amblyomma cajennense PE	313	35.0317	5.50342	1	1	4	4	0	3.51	1	1	0	0	0	0	0	0	0	0	0	0	0	0	0	11.82	3	3	0	0	0	0	0.333333	1	3	1.58496	≥ 0.05	-
A0A023FUH6	Putative lipoprotein amino terminal region (Fragment)	Amblyomma cajennense PE	351	38.2775	7.40088	2	3	6	16	3.44252	2.85	1	2	1.75509	3.13	1	3	0	10.83	2	2	0	0	0	0	0	0	0	0	1.72197	12.82	3	4	2.33333	1.33333	0.571429	-0.807355	≥ 0.05	P:lipid transport; F:lipid transporter activity
A0A023FUH8	Putative ribosomal protein l26e strongylocentrotus purpuratus	Amblyomma parvum PE	146	17.1566	11.0776	3	4	10	12	0	0	0	0	4.91801	6.16	2	2	0	8.9	2	2	0	0	0	0	1.68373	23.97	3	3	0	0	0	0	1.33333	1	0.75	-0.415037	≥ 0.05	F:structural constituent of ribosome; P:translation; C:large ribosomal subunit; C:ribosome
A0A023FUI1	Putative peptidase family m13 includes neprilysin	Amblyomma cajennense PE	355	40.0915	6.30322	1	9	12	19	0	0	0	0	0	9.01	2	2	0	20.85	5	5	0	6.48	2	2	1.87497	13.8	3	4	0	0	0	0	2.33333	2	0.857143	-0.222392	≥ 0.05	P:proteolysis; F:metalloendopeptidase activity
A0A023FUI3	Putative alkyl hydroperoxide reductase thiol specific antioxidant (Fragment)	Amblyomma cajennense PE	262	28.5987	6.97607	2	1	17	105	12.0942	29.39	10	17	9.62671	34.73	12	17	10.0646	25.57	9	16	10.0541	17.18	6	10	10.3637	14.12	5	10	7.24427	15.27	6	11	16.6667	10.3333	0.62	-0.68966	≥ 0.05	P:oxidation-reduction process; F:oxidoreductase activity; F:antioxidant activity; F:peroxiredoxin activity
A0A023FUI6	Putative 40s ribosomal protein s15	Amblyomma parvum PE	149	17.2412	10.0376	3	3	5	9	0	0	0	0	6.05943	17.45	2	2	2.20354	23.49	2	4	0	0	0	0	0	0	0	0	0	0	0	0	2	0	0	#NUM!	≥ 0.05	F:structural constituent of ribosome; F:RNA binding; P:translation; C:small ribosomal subunit; C:ribonucleoprotein complex; C:ribosome
A0A023FUI7	Putative secreted protein	Amblyomma cajennense PE	273	31.075	5.21143	1	1	5	5	0	6.96	2	2	0	0	0	0	0	0	0	0	0	0	0	0	0	0	0	0	0	12.45	3	3	0.666667	1	1.5	0.584963	≥ 0.05	-
A0A023FUJ1	Putative tick metalloprotease 32 (Fragment)	Amblyomma cajennense PE	277	31.7752	5.8335	1	2	7	8	0	0	0	0	0	0	0	0	0	15.52	3	4	2.15649	8.66	2	2	0	14.44	2	2	0	0	0	0	1.33333	1.33333	1	0	≥ 0.05	P:proteolysis; F:metallopeptidase activity; F:peptidase activity
A0A023FUJ2	Putative ubiquitin protein ligase	Amblyomma parvum PE	151	17.0169	6.56592	2	1	4	4	0	11.26	2	2	0	0	0	0	0	0	0	0	1.75434	5.3	1	1	0	0	0	0	0	11.26	1	1	0.666667	0.666667	1	0	≥ 0.05	F:ligase activity; P:metabolic process
A0A023FUK3	Putative vesicle transport through interaction with t-snares-like protein 1b (Fragment)	Amblyomma parvum PE	217	24.4598	7.44482	2	1	3	3	0	0	0	0	0	0	0	0	0	0	0	0	0	0	0	0	2.19869	20.28	3	3	0	0	0	0	0	1	#DIV/0!	#DIV/0!	≥ 0.05	P:membrane fusion; P:vesicle-mediated transport; C:membrane; F:SNAP receptor activity; P:intracellular protein transport; C:Golgi apparatus; P:transport
A0A023FUL4	Uncharacterized protein	Amblyomma cajennense PE	304	33.8539	8.98291	1	1	8	20	0	11.51	3	4	0	8.22	2	2	0	5.59	1	2	2.32639	13.16	4	6	0	16.78	4	4	0	0	0	0	2.66667	3.33333	1.25	0.321928	≥ 0.05	-
A0A023FUL5	Putative line l1 all (Fragment)	Amblyomma parvum PE	203	22.8891	8.22119	1	1	6	10	0	0	0	0	0	15.76	3	3	0	26.11	4	4	0	0	0	0	2.05162	9.36	1	1	0	0	0	0	2.33333	0.333333	0.142857	-2.80735	≥ 0.05	-
A0A023FUN7	Putative esterase d (Fragment)	Amblyomma parvum PE	160	17.8488	7.13721	1	1	5	6	0	15.63	1	1	1.78019	21.25	3	3	0	0	0	0	0	0	0	0	0	8.75	1	2	0	0	0	0	1.33333	0.666667	0.5	-1	≥ 0.05	P:formaldehyde catabolic process; F:S-formylglutathione hydrolase activity
A0A023FUP7	Putative methylmalonyl-coa epimerase mitochondrial	Amblyomma parvum PE	163	17.9677	9.02686	1	0	6	6	0	0	0	0	0	39.88	4	4	0	14.72	1	1	0	0	0	0	0	0	0	0	0	0	0	0	1.66667	0	0	#NUM!	≥ 0.05	-
A0A023FUQ0	Uncharacterized protein	Amblyomma cajennense PE	401	43.3974	7.57666	3	2	6	7	0	0	0	0	0	0	0	0	0	0	0	0	0	5.24	2	2	0	0	0	0	2.02217	7.23	2	2	0	1.33333	#DIV/0!	#DIV/0!	≥ 0.05	-
A0A023FUS2	Putative presqualene diphosphate phosphatase ixodes scapularis presqualene diphosphate phosphatase	Amblyomma parvum PE	237	26.3329	8.17725	1	1	2	6	0	0	0	0	0	5.91	1	2	0	15.61	2	3	0	0	0	0	0	0	0	0	0	0	0	0	1.66667	0	0	#NUM!	≥ 0.05	P:metabolic process; C:membrane; F:catalytic activity
A0A023FUS9	Golgi SNAP receptor complex member 1	Amblyomma parvum PE	239	27.3744	9.61279	1	4	11	25	1.79451	12.55	3	3	1.9101	13.39	4	4	0	20.5	4	4	1.79614	10.04	2	2	1.65299	15.48	3	3	5.09873	8.79	2	3	3.66667	2.66667	0.727273	-0.459432	≥ 0.05	P:protein transport; C:integral component of membrane; C:membrane; C:Golgi membrane; P:transport; C:Golgi apparatus; P:ER to Golgi vesicle-mediated transport; P:vesicle-mediated transport; C:cis-Golgi network
A0A023FUT0	Putative lethal 2 35di	Amblyomma parvum PE	174	20.6015	9.72998	1	1	3	6	0	0	0	0	0	0	0	0	0	0	0	0	0	4.02	1	1	0	0	0	0	0	10.34	2	3	0	1.33333	#DIV/0!	#DIV/0!	≥ 0.05	-
A0A023FUT3	Putative adipocyte plasma membrane-associated protein (Fragment)	Amblyomma parvum PE	244	27.8936	9.12939	1	3	5	12	5.46838	13.11	3	4	0	0	0	0	0	0	0	0	0	4.92	1	2	0	0	0	0	0	9.43	2	2	1.33333	1.33333	1	0	≥ 0.05	P:biosynthetic process; F:strictosidine synthase activity
A0A023FUT4	Putative regulator of microtubule dynamics protein 1 (Fragment)	Amblyomma parvum PE	245	27.8923	7.76709	1	1	10	16	0	0	0	0	0	19.18	4	4	0	0	0	0	0	6.12	2	2	1.99808	16.33	5	5	0	8.98	2	2	1.33333	3	2.25	1.16993	≥ 0.05	-
A0A023FUV1	Proteasome subunit alpha type	Amblyomma parvum PE	254	28.101	5.41455	3	3	14	31	1.99616	19.29	5	5	7.77029	17.32	5	5	0	0	0	0	6.66483	22.05	5	7	3.77063	14.96	4	5	1.83714	10.24	3	3	3.33333	5	1.5	0.584963	≥ 0.05	P:proteolysis involved in cellular protein catabolic process; C:proteasome core complex, alpha-subunit complex; F:endopeptidase activity; F:hydrolase activity; C:nucleus; C:cytoplasm; F:threonine-type endopeptidase activity; C:proteasome core complex; C:proteasome complex; P:ubiquitin-dependent protein catabolic process; F:peptidase activity; P:proteolysis
A0A023FUV2	Putative vitellogenin-2	Amblyomma cajennense PE	1546	177.098	6.69775	1	3	25	28	0	7.12	7	7	0	0	0	0	2.13103	2.98	3	3	2.03919	2.59	3	3	1.75524	2.59	4	4	0	0	0	0	3.33333	2.33333	0.7	-0.514573	≥ 0.05	P:lipid transport; F:lipid transporter activity
A0A023FUV5	Putative optokinetic response b (Fragment)	Amblyomma parvum PE	255	29.1061	8.52881	2	4	5	7	0	0	0	0	0	7.45	1	2	0	3.92	1	1	0	21.57	4	4	0	0	0	0	0	0	0	0	1	1.33333	1.33333	0.415037	≥ 0.05	C:membrane
A0A023FUW0	Putative late endosomal/lysosomal adaptor mapk and mtor activator 1 (Fragment)	Amblyomma parvum PE	187	20.5183	7.12256	1	1	3	4	0	14.97	2	2	0	0	0	0	0	0	0	0	0	11.76	1	2	0	0	0	0	0	0	0	0	0.666667	0.666667	1	0	≥ 0.05	P:cellular response to amino acid stimulus; P:endosome localization; P:lysosome organization; C:membrane raft; P:positive regulation of TOR signaling; P:regulation of receptor recycling; C:Ragulator complex; P:cholesterol homeostasis; C:late endosome membrane; P:positive regulation of MAPK cascade
A0A023FUW4	Putative evasin 1 (Fragment)	Amblyomma cajennense PE	146	16.0212	8.70459	2	2	4	5	0	0	0	0	0	0	0	0	0	26.03	3	3	0	0	0	0	0	0	0	0	2.26262	21.23	2	2	1	0.666667	0.666667	-0.584963	≥ 0.05	-
A0A023FUW8	Putative tick metalloprotease 1	Amblyomma cajennense PE	532	60.3142	5.56689	1	2	8	9	0	0	0	0	0	0	0	0	0	0	0	0	0	12.97	4	4	0	0	0	0	1.61819	8.27	4	4	0	2.66667	#DIV/0!	#DIV/0!	≥ 0.05	P:proteolysis; F:metallopeptidase activity; F:peptidase activity; F:metalloendopeptidase activity
A0A023FV00	Putative flotillin	Amblyomma parvum PE	197	21.455	5.88428	1	1	9	18	1.84967	18.78	2	2	0	0	0	0	0	31.98	3	5	1.65812	25.38	3	4	0	0	0	0	4.63141	30.46	4	4	2.33333	2.66667	1.14286	0.192645	≥ 0.05	-
A0A023FV01	Putative cargo transport protein erv29	Amblyomma parvum PE	272	30.5051	8.95361	5	1	3	4	2.63945	4.78	1	1	0	0	0	0	0	0	0	0	0	0	0	0	0	0	0	0	2.29308	12.5	3	3	0.333333	1	3	1.58496	≥ 0.05	C:integral component of membrane
A0A023FV06	Putative tho complex 4 (Fragment)	Amblyomma parvum PE	274	28.9908	10.9312	3	6	14	22	5.17133	16.79	4	4	11.5655	21.9	5	6	7.29384	24.45	5	5	1.60342	10.95	3	3	0	12.77	2	2	0	0	0	0	5	1.66667	0.333333	-1.58496	≥ 0.05	F:nucleic acid binding; F:mRNA binding; F:nucleotide binding; P:mRNA export from nucleus; C:intracellular
A0A023FV19	Putative acid phosphatase	Amblyomma parvum PE	164	19.3216	7.03467	1	1	5	6	0	0	0	0	0	16.46	2	2	0	21.95	2	2	0	0	0	0	0	9.76	1	1	0	0	0	0	1.33333	0.333333	0.25	-2	≥ 0.05	F:phosphatase activity; P:protein dephosphorylation
A0A023FV27	Uncharacterized protein	Amblyomma parvum PE	187	19.2703	7.48877	1	1	6	18	1.71371	33.16	4	5	0	0	0	0	1.71323	22.46	3	5	1.7606	22.46	3	3	0	13.9	2	2	0	10.7	1	1	3.33333	2	0.6	-0.736966	≥ 0.05	-
A0A023FV34	Putative succinate dehydrogenase fe-s protein subunit	Amblyomma parvum PE	282	31.6549	8.55811	1	3	15	27	0	0	0	0	1.86451	15.96	4	7	0	8.87	2	2	0	23.05	5	5	0	3.55	1	1	2.05319	16.31	4	4	3	3.33333	1.11111	0.152003	≥ 0.05	C:mitochondrial inner membrane; F:electron carrier activity; C:mitochondrion; P:tricarboxylic acid cycle; P:oxidation-reduction process; F:4 iron, 4 sulfur cluster binding; F:3 iron, 4 sulfur cluster binding; F:2 iron, 2 sulfur cluster binding; F:oxidoreductase activity; F:iron-sulfur cluster binding; F:metal ion binding; F:succinate dehydrogenase (ubiquinone) activity
A0A023FV36	Uncharacterized protein	Amblyomma parvum PE	206	21.937	5.63037	1	1	5	11	0	0	0	0	0	24.76	3	3	0	16.5	1	2	0	0	0	0	1.81416	3.88	1	1	0	7.28	2	2	1.66667	1	0.6	-0.736966	≥ 0.05	-
A0A023FV38	Putative 15-hydroxyprostaglandin dehydrogenase	Amblyomma parvum PE	276	29.9102	7.73779	1	2	7	9	0	0	0	0	0	0	0	0	0	12.68	2	2	0	9.78	2	2	1.64115	23.19	4	5	0	0	0	0	0.666667	2.33333	3.5	1.80735	≥ 0.05	P:oxidation-reduction process; F:oxidoreductase activity; P:metabolic process
A0A023FV51	Putative ubiquinol cytochrome c reductase assembly protein cbp3 (Fragment)	Amblyomma parvum PE	258	29.464	8.11865	1	1	4	6	0	0	0	0	0	0	0	0	0	0	0	0	1.65619	18.22	4	6	0	0	0	0	0	0	0	0	0	2	#DIV/0!	#DIV/0!	≥ 0.05	-
A0A023FV58	Cytochrome b-c1 complex subunit Rieske, mitochondrial	Amblyomma parvum PE	273	29.6853	9.34912	1	2	6	6	0	0	0	0	1.74311	11.36	2	2	0	0	0	0	0	0	0	0	0	0	0	0	0	0	0	0	0.666667	0	0	#NUM!	≥ 0.05	C:membrane; C:mitochondrial inner membrane; C:respiratory chain; C:mitochondrion; F:oxidoreductase activity, acting on diphenols and related substances as donors; P:oxidation-reduction process; F:2 iron, 2 sulfur cluster binding; F:oxidoreductase activity; F:iron-sulfur cluster binding; P:hydrogen ion transmembrane transport; F:metal ion binding; F:ubiquinol-cytochrome-c reductase activity
A0A023FV60	Putative cytochrome p450 (Fragment)	Amblyomma parvum PE	314	35.6856	8.71924	3	1	14	19	0	12.42	3	3	0	3.5	1	1	0	16.56	4	5	0	13.06	3	3	0	10.83	2	3	0	0	0	0	3	2	0.666667	-0.584963	≥ 0.05	P:oxidation-reduction process; F:oxidoreductase activity, acting on paired donors, with incorporation or reduction of molecular oxygen; F:heme binding; F:iron ion binding
A0A023FV64	Putative cell growth-regulating nucleolar protein (Fragment)	Amblyomma parvum PE	290	32.6824	8.98291	1	1	6	8	0	0	0	0	0	0	0	0	0	0	0	0	0	8.62	2	3	0	0	0	0	2.00314	11.38	2	2	0	1.66667	#DIV/0!	#DIV/0!	≥ 0.05	-
A0A023FV66	Putative cytosolic sulfotransfer	Amblyomma parvum PE	348	40.1018	5.52881	1	1	5	6	0	0	0	0	0	0	0	0	0	15.8	4	5	0	0	0	0	0	3.45	1	1	0	0	0	0	1.66667	0.333333	0.2	-2.32193	≥ 0.05	P:metabolic process; F:sulfotransferase activity
A0A023FV74	Protein involved in mrna turnover	Amblyomma parvum PE	289	33.161	9.1001	2	1	3	5	0	0	0	0	1.63673	4.15	1	1	0	4.5	1	1	0	0	0	0	1.62218	4.15	1	1	0	5.54	2	2	0.666667	1	1.5	0.584963	≥ 0.05	C:ribonucleoprotein complex; P:ribosome biogenesis; C:ribosome; C:intracellular
A0A023FV76	Putative member of the intramitochondrial sorting protein family (Fragment)	Amblyomma parvum PE	204	22.7815	8.77783	5	1	4	5	0	21.08	3	3	0	0	0	0	0	0	0	0	0	0	0	0	0	10.29	1	2	0	0	0	0	1	0.666667	0.666667	-0.584963	≥ 0.05	-
A0A023FV77	Uncharacterized protein	Amblyomma parvum PE	294	30.9584	8.51416	1	2	7	15	0	0	0	0	0	20.07	3	3	0	0	0	0	0	9.86	2	2	0	5.44	1	1	0	11.22	2	2	1	1.66667	1.66667	0.736966	≥ 0.05	P:oxidation-reduction process; F:oxidoreductase activity; P:metabolic process
A0A023FV83	Putative transcription elongation factor tfiis/cofactor of enhancer-binding protein sp1 (Fragment)	Amblyomma parvum PE	297	33.0915	8.52881	2	3	21	43	1.74026	21.21	5	5	4.19054	12.12	2	3	0	22.9	5	6	1.64076	34.34	6	7	1.21346	42.76	8	10	1.89526	33.33	7	7	4.66667	8	1.71429	0.777608	≥ 0.05	P:regulation of DNA-templated transcription, elongation; F:DNA binding; C:nucleus; P:translational elongation; F:nucleic acid binding; F:zinc ion binding; P:regulation of transcription from RNA polymerase II promoter; F:translation elongation factor activity; P:regulation of transcription, DNA-templated; P:transcription, DNA-templated
A0A023FV89	Putative transcription initiation factor	Amblyomma parvum PE	301	32.0659	9.56885	7	1	7	11	0	0	0	0	0	0	0	0	0	0	0	0	0	23.92	5	5	0	0	0	0	1.9292	14.62	4	4	0	3	#DIV/0!	#DIV/0!	≥ 0.05	P:translational initiation; P:DNA-templated transcription, initiation; F:translation initiation factor activity; F:protein heterodimerization activity
A0A023FV90	Putative mitochondrial/plastidial beta-ketoacyl-acp reductase (Fragment)	Amblyomma parvum PE	210	22.5378	9.5542	2	1	5	6	0	0	0	0	0	0	0	0	0	0	0	0	0	26.19	4	4	0	0	0	0	0	0	0	0	0	1.33333	#DIV/0!	#DIV/0!	≥ 0.05	P:oxidation-reduction process; F:oxidoreductase activity; P:metabolic process
A0A023FV93	Putative dna-directed rna polymerase i subunit rpa49 (Fragment)	Amblyomma parvum PE	300	33.3755	8.47021	1	1	7	17	0	0	0	0	0	8.67	2	2	0	11.33	3	3	0	0	0	0	0	18.67	5	5	0	11.33	3	4	1.66667	3	1.8	0.847997	≥ 0.05	P:transcription, DNA-templated; F:DNA-directed RNA polymerase activity; C:nucleus; F:DNA binding
A0A023FV96	Putative ankyrin repeat protein (Fragment)	Amblyomma parvum PE	425	47.489	6.26514	1	2	8	11	0	5.88	1	1	0	6.59	2	2	0	4.94	1	2	0	0	0	0	2.09396	3.76	1	1	0	9.41	2	2	1.66667	1	0.6	-0.736966	≥ 0.05	-
A0A023FVA0	Putative nucleic acid-binding protein asmtl	Amblyomma parvum PE	212	23.5441	6.78564	1	1	6	9	0	0	0	0	0	15.57	3	3	0	0	0	0	0	9.43	2	2	0	0	0	0	1.76803	15.09	4	4	1	2	2	1	≥ 0.05	C:cytoplasm
A0A023FVA1	Putative leucine permease transcriptional regulator (Fragment)	Amblyomma parvum PE	351	39.2049	10.0229	1	1	9	14	0	0	0	0	0	0	0	0	0	0	0	0	0	0	0	0	1.25705	7.41	3	3	2.24978	25.64	7	7	0	3.33333	#DIV/0!	#DIV/0!	≥ 0.05	-
A0A023FVA6	Putative trna methyltransferase (Fragment)	Amblyomma parvum PE	361	39.281	7.78174	1	1	3	4	0	0	0	0	0	0	0	0	0	9.97	3	4	0	0	0	0	0	0	0	0	0	0	0	0	1.33333	0	0	#NUM!	≥ 0.05	F:RNA binding; F:methyltransferase activity; P:tRNA methylation; F:transferase activity; P:tRNA processing; F:tRNA (guanine-N2-)-methyltransferase activity; P:methylation
A0A023FVB2	Putative glycine-rich cell wall structural protein 1.8 (Fragment)	Amblyomma parvum PE	383	37.9078	9.72998	1	3	4	6	0	0	0	0	2.18304	17.23	3	3	0	0	0	0	0	6.01	1	1	0	8.62	2	2	0	0	0	0	1	1	1	0	≥ 0.05	-
A0A023FVB6	Putative member of glycosyl hydrolase family 18	Amblyomma parvum PE	391	43.6316	8.29443	2	4	11	20	2.0233	5.63	2	2	0	0	0	0	2.00739	10.49	4	5	0	14.83	3	3	2.1135	7.16	3	3	2.00363	7.16	3	3	2.33333	3	1.28571	0.36257	≥ 0.05	P:chitin catabolic process; F:hydrolase activity, hydrolyzing O-glycosyl compounds; F:hydrolase activity; P:carbohydrate metabolic process; F:chitinase activity
A0A023FVB8	Putative rna polymerase ii elongation factor	Amblyomma parvum PE	526	59.1498	9.43701	2	3	20	33	0	13.31	6	8	1.85637	8.94	4	4	0	11.41	5	5	0	9.51	6	6	0	9.89	4	4	0	0	0	0	5.66667	3.33333	0.588235	-0.765535	≥ 0.05	P:translational elongation; F:translation elongation factor activity; C:transcription elongation factor complex; P:transcription elongation from RNA polymerase II promoter
A0A023FVC4	Putative spermidine synthase (Fragment)	Amblyomma parvum PE	315	35.4988	6.1001	4	1	8	9	0	16.83	3	3	2.30628	4.76	1	1	0	7.94	2	2	1.9035	16.83	3	3	0	0	0	0	0	0	0	0	2	1	0.5	-1	≥ 0.05	F:transferase activity; P:metabolic process; F:catalytic activity
A0A023FVC8	Putative negative elongation factor b negative elongation factor b	Amblyomma parvum PE	620	68.9246	6.30322	2	1	11	27	2.01125	10.48	5	7	1.88098	1.77	1	1	3.22666	10.16	5	6	1.96489	8.06	4	4	1.89915	2.58	2	3	4.53295	4.19	2	2	4.66667	3	0.642857	-0.63743	≥ 0.05	P:translational elongation; F:translation elongation factor activity; P:negative regulation of transcription, DNA-templated; C:nucleus
A0A023FVD2	Putative transmembrane anterior posterior transformation protein 1	Amblyomma parvum PE	464	52.9459	8.93896	1	7	11	20	0	8.62	3	3	0	11.85	3	3	1.75393	11.85	4	4	1.85594	5.17	2	2	0	0	0	0	1.7954	7.33	2	3	3.33333	1.66667	0.5	-1	≥ 0.05	C:integral component of membrane
A0A023FVD5	Putative ubiquitin carboxyl-terminal hydrolase (Fragment)	Amblyomma parvum PE	687	79.8648	5.93506	1	1	14	21	0	3.93	3	3	0	0	0	0	2.16669	5.68	4	4	0	10.92	6	6	0	0	0	0	0	8.44	7	8	2.33333	4.66667	2	1	≥ 0.05	F:hydrolase activity; F:ubiquitinyl hydrolase activity; P:ubiquitin-dependent protein catabolic process
A0A023FVE3	Putative scaffold attachment factor b	Amblyomma parvum PE	846	91.2041	8.27979	1	7	33	54	1.75957	7.92	6	6	1.60654	13	11	11	0	7.57	6	8	1.6403	8.75	7	7	1.98062	5.67	4	4	1.81699	8.39	7	7	8.33333	6	0.72	-0.473931	≥ 0.05	F:nucleic acid binding; F:nucleotide binding
A0A023FVE7	Putative o-linked n-acetylglucosamine transferase ogt (Fragment)	Amblyomma parvum PE	1030	114.666	6.81494	5	2	15	21	0	0	0	0	1.66137	6.02	4	4	0	7.18	5	5	1.64373	6.89	7	8	0	0	0	0	0	4.95	4	4	3	4	1.33333	0.415037	≥ 0.05	F:transferase activity; P:metabolic process
A0A023FVE8	Putative translation initiation factor 2b gamma subunit eif-2bgamma/gcd1 (Fragment)	Amblyomma parvum PE	220	23.751	5.8208	1	5	10	14	1.64327	3.64	1	1	1.81379	31.36	4	4	0	13.64	2	2	1.60426	11.36	2	2	0	13.64	2	2	0	0	0	0	2.33333	1.33333	0.571429	-0.807355	≥ 0.05	P:translational initiation; F:translation initiation factor activity
A0A023FVF2	Putative arp2/3 complex-interacting protein vip1/asp1 involved in regulation of actin cytoskeleton	Amblyomma parvum PE	1150	130.954	6.72705	1	1	36	53	0	5.13	5	5	0	5.04	4	4	5.43242	10.96	10	12	0	7.65	6	6	0	7.04	7	7	0	0	0	0	7	4.33333	0.619048	-0.691878	≥ 0.05	P:protein dephosphorylation; F:acid phosphatase activity
A0A023FVF5	Uncharacterized protein (Fragment)	Amblyomma parvum PE	156	17.8912	7.50342	1	2	2	3	1.60579	8.33	1	1	0	0	0	0	0	0	0	0	0	0	0	0	0	0	0	0	0	17.31	2	2	0.333333	0.666667	2	1	≥ 0.05	F:ribosylnicotinamide kinase activity; P:phosphorylation; P:nicotinamide nucleotide biosynthetic process
A0A023FVF6	Putative glycine rich protein	Amblyomma parvum PE	221	23.9293	8.27979	2	1	10	24	0	14.93	2	2	3.45502	20.81	3	4	0	9.95	3	3	0	10.86	1	1	0	11.76	3	3	0	25.79	3	3	3	2.33333	0.777778	-0.36257	≥ 0.05	F:metal ion binding; F:nucleic acid binding; F:nucleotide binding; F:zinc ion binding
A0A023FVF7	Putative glycine-rich secreted cement protein	Amblyomma parvum PE	322	30.1136	9.86182	1	1	3	3	0	0	0	0	0	0	0	0	0	0	0	0	0	0	0	0	0	14.29	2	2	0	0	0	0	0	0.666667	#DIV/0!	#DIV/0!	≥ 0.05	-
A0A023FVG5	Putative mitochondrial inner membrane protein mitofilin	Amblyomma parvum PE	700	78.4888	7.00537	1	2	28	45	1.69495	9.57	6	6	0	7.14	4	5	2.03416	10.43	7	7	0	3.71	2	4	1.6337	11.86	7	7	0	14	6	7	6	6	1	0	≥ 0.05	C:mitochondrion; C:integral component of membrane; C:membrane; C:mitochondrial inner membrane
A0A023FVG8	Putative karyopherin importin beta 1 (Fragment)	Amblyomma parvum PE	780	85.5187	4.79248	2	1	16	31	0	10.9	4	4	0	0	0	0	1.84267	4.62	3	3	5.26456	7.31	4	5	1.71265	11.28	5	7	3.42823	3.21	2	3	2.33333	5	2.14286	1.09954	≥ 0.05	P:nucleocytoplasmic transport; P:protein transport; F:protein transporter activity; C:intracellular
A0A023FVG9	Uncharacterized protein	Amblyomma parvum PE	354	39.3057	6.82959	1	1	4	5	0	9.04	2	2	0	0	0	0	0	10.73	2	2	0	0	0	0	0	0	0	0	0	0	0	0	1.33333	0	0	#NUM!	≥ 0.05	-
A0A023FVI3	Putative mitochondrial f1f0-atp synthase subunit oscp/atp5 (Fragment)	Amblyomma parvum PE	218	23.6638	9.40771	2	3	8	9	0	0	0	0	0	0	0	0	0	25.69	3	3	0	2.75	1	1	2.05793	25.69	4	4	0	0	0	0	1	1.66667	1.66667	0.736966	≥ 0.05	P:ATP synthesis coupled proton transport; F:proton-transporting ATP synthase activity, rotational mechanism
A0A023FVI8	Putative glutathione s-transferase	Amblyomma parvum PE	219	25.2329	8.00146	1	1	5	8	0	0	0	0	1.65336	10.5	2	2	0	0	0	0	0	0	0	0	0	0	0	0	0	0	0	0	0.666667	0	0	#NUM!	≥ 0.05	F:transferase activity; P:metabolic process
A0A023FVJ5	Putative branched chain aminotransferase bcat1 pyridoxal phosphate enzyme type iv superfamily (Fragment)	Amblyomma parvum PE	233	25.9515	7.72314	1	2	5	12	0	5.15	1	1	0	0	0	0	0	15.88	3	6	0	15.45	2	3	0	0	0	0	0	12.88	2	2	2.33333	1.66667	0.714286	-0.485427	≥ 0.05	F:transferase activity; P:metabolic process; F:catalytic activity; F:transaminase activity
A0A023FVJ9	Putative phosphatidylinositol transfer protein	Amblyomma parvum PE	175	19.8879	5.98584	1	5	8	32	0	11.43	2	2	1.9688	20	3	5	1.65369	18.29	3	7	2.3159	33.14	4	7	0	0	0	0	2.1485	20	4	7	4.66667	4.66667	1	0	≥ 0.05	P:transport; C:intracellular
A0A023FVK3	Putative ribokinase	Amblyomma parvum PE	334	36.0632	6.82959	1	5	10	16	0	0	0	0	2.03347	23.05	5	5	0	20.06	5	5	0	0	0	0	0	0	0	0	0	0	0	0	3.33333	0	0	#NUM!	≥ 0.05	P:carbohydrate phosphorylation; F:kinase activity; P:phosphorylation; P:D-ribose metabolic process; F:ribokinase activity
A0A023FVK4	Putative dehydrogenase (Fragment)	Amblyomma parvum PE	209	21.9378	9.26123	1	1	6	9	0	0	0	0	0	0	0	0	0	22.01	3	3	0	24.88	4	4	0	0	0	0	0	0	0	0	1	1.33333	1.33333	0.415037	≥ 0.05	P:oxidation-reduction process; F:oxidoreductase activity; P:metabolic process
A0A023FVK5	Uncharacterized protein (Fragment)	Amblyomma parvum PE	222	24.9403	4.79248	1	1	9	12	1.66781	9.01	3	3	0	9.01	2	2	0	14.41	2	3	0	0	0	0	0	13.51	2	3	0	0	0	0	2.66667	1	0.375	-1.41504	≥ 0.05	F:sequence-specific DNA binding
A0A023FVK8	Putative multidrug resistance-associated protein/mitoxantrone resistance protein abc superfamily (Fragment)	Amblyomma parvum PE	334	38.4151	9.84717	1	1	12	20	0	5.99	2	2	0	0	0	0	0	21.86	6	7	0	11.38	3	4	0	0	0	0	0	11.38	3	5	3	3	1	0	≥ 0.05	F:ATP binding; C:integral component of membrane; F:ATPase activity, coupled to transmembrane movement of substances; P:transmembrane transport; P:transport
A0A023FVL3	Putative fructose-16-bisphosphatase	Amblyomma parvum PE	338	36.5848	7.95752	1	2	8	9	0	14.5	4	4	0	0	0	0	0	10.06	2	2	0	0	0	0	0	4.44	1	1	0	0	0	0	2	0.333333	0.166667	-2.58496	≥ 0.05	F:hydrolase activity; P:protein dephosphorylation; P:carbohydrate metabolic process; F:phosphoric ester hydrolase activity; F:fructose 1,6-bisphosphate 1-phosphatase activity
A0A023FVL4	Putative stress-induced-phosphoprotein 1 (Fragment)	Amblyomma parvum PE	358	40.4994	7.51807	1	1	25	56	8.11613	20.39	7	9	11.9284	24.02	8	9	8.47961	16.48	6	7	4.94111	10.89	4	5	3.478	23.74	7	8	4.05159	21.51	8	8	8.33333	7	0.84	-0.251539	≥ 0.05	-
A0A023FVM1	Putative suppressor of g2 allele of skp1 (Fragment)	Amblyomma parvum PE	339	38.3802	5.37646	1	3	4	6	0	4.42	1	1	0	0	0	0	1.60509	12.09	3	4	0	0	0	0	0	0	0	0	0	0	0	0	1.66667	0	0	#NUM!	≥ 0.05	F:ATP binding; C:cytoplasm; P:protein folding
A0A023FVM3	Putative ribosomal protein (Fragment)	Amblyomma parvum PE	227	26.3909	9.71533	1	1	6	10	0	0	0	0	2.1605	13.22	2	2	0	0	0	0	0	0	0	0	1.82719	22.47	3	4	3.61759	18.94	3	4	0.666667	2.66667	4	2	≥ 0.05	P:translation; C:ribosome
A0A023FVM8	Reticulon-like protein	Amblyomma parvum PE	228	25.5436	8.39697	4	1	8	14	0	0	0	0	3.86822	19.3	4	4	0	0	0	0	3.35703	17.11	4	4	0	0	0	0	0	0	0	0	1.33333	1.33333	1	0	≥ 0.05	C:endoplasmic reticulum membrane; C:integral component of membrane; C:membrane; C:endoplasmic reticulum
A0A023FVN7	Putative rab-like protein 3	Amblyomma parvum PE	233	25.2901	8.63135	2	1	10	31	0	0	0	0	1.7226	9.44	2	4	1.6711	10.3	4	7	1.79681	18.03	3	4	1.69848	18.03	3	3	1.63608	9.44	2	2	3.66667	3	0.818182	-0.289507	≥ 0.05	F:GTP binding; P:small GTPase mediated signal transduction; F:nucleotide binding; C:intracellular
A0A023FVP4	Putative nima never in mitosis-related g2-specific serine/threonine protein kinase (Fragment)	Amblyomma parvum PE	236	26.9045	8.33838	1	4	9	17	0	8.05	2	2	0	25	4	4	0	0	0	0	0	18.22	3	3	0	6.78	1	1	0	15.68	3	4	2	2.66667	1.33333	0.415037	≥ 0.05	F:kinase activity; F:ATP binding; F:protein kinase activity; P:phosphorylation; P:protein phosphorylation; F:protein serine/threonine kinase activity
A0A023FVP8	Putative b-cell receptor-associated protein	Amblyomma parvum PE	238	27.3372	8.79248	3	1	3	3	0	12.61	1	1	0	0	0	0	1.64235	8.4	2	2	0	0	0	0	0	0	0	0	0	0	0	0	1	0	0	#NUM!	≥ 0.05	C:integral component of membrane; C:endoplasmic reticulum; P:intracellular protein transport
A0A023FVP9	Putative piggybac (Fragment)	Amblyomma parvum PE	436	49.2468	9.77393	1	2	10	13	0	0	0	0	0	20.87	5	6	0	10.78	3	3	0	0	0	0	0	5.96	2	2	0	0	0	0	3	0.666667	0.222222	-2.16993	≥ 0.05	F:DNA binding
A0A023FVQ2	Putative signal recognition particle receptor beta subunit (Fragment)	Amblyomma parvum PE	249	27.8607	8.96826	2	1	8	12	0	16.47	3	3	0	0	0	0	1.604	13.65	3	4	0	0	0	0	0	9.64	2	2	0	0	0	0	2.33333	0.666667	0.285714	-1.80735	≥ 0.05	-
A0A023FVR6	Putative myosin heavy polypeptide 9a non-muscle	Amblyomma parvum PE	139	15.7382	8.51416	1	1	7	9	1.94598	26.62	3	3	0	0	0	0	1.62512	15.11	2	2	0	0	0	0	0	0	0	0	0	40.29	4	4	1.66667	1.33333	0.8	-0.321928	≥ 0.05	-
A0A023FVR7	Putative atp synthase subunit b (Fragment)	Amblyomma parvum PE	245	28.0865	8.39697	1	1	11	19	2.04872	14.69	3	3	0	32.24	5	5	0	19.59	3	3	0	13.47	2	3	0	0	0	0	0	5.71	1	1	3.66667	1.33333	0.363636	-1.45943	≥ 0.05	F:hydrogen ion transmembrane transporter activity; P:ATP synthesis coupled proton transport; C:mitochondrial proton-transporting ATP synthase complex, coupling factor F(o)
A0A023FVT9	Putative tick til 22 (Fragment)	Amblyomma parvum PE	132	14.7264	9.89111	1	3	5	9	0	0	0	0	0	24.24	3	3	0	0	0	0	0	0	0	0	0	9.09	1	2	0	0	0	0	1	0.666667	0.666667	-0.584963	≥ 0.05	-
A0A023FVU1	Putative vacuolar h+-atpase v1 sector subunit d	Amblyomma parvum PE	252	28.7434	9.56885	4	1	6	12	0	0	0	0	0	0	0	0	0	16.27	4	4	0	0	0	0	1.56308	9.13	2	4	0	14.29	4	4	1.33333	2.66667	2	1	≥ 0.05	F:ATPase activity, coupled to transmembrane movement of substances; P:transmembrane transport
A0A023FVV0	Uncharacterized protein	Amblyomma parvum PE	255	27.8394	10.0229	1	2	6	10	0	0	0	0	0	0	0	0	0	0	0	0	0	0	0	0	0	11.76	2	2	0	0	0	0	0	0.666667	#DIV/0!	#DIV/0!	≥ 0.05	-
A0A023FVV6	Putative short-chain alcohol dehydrogenase/3-hydroxyacyl-coa dehydrogenase	Amblyomma parvum PE	260	27.2414	8.14795	1	1	10	19	2.07398	4.62	1	1	3.48494	11.15	3	4	0	0	0	0	1.29177	17.69	4	5	0	0	0	0	1.94342	4.62	1	3	1.66667	2.66667	1.6	0.678072	≥ 0.05	P:oxidation-reduction process; F:oxidoreductase activity; P:metabolic process
A0A023FVW0	Putative receptor-mediated endocytosis (Fragment)	Amblyomma parvum PE	341	38.0398	7.73779	1	1	12	18	2.3795	17.89	4	4	1.69764	4.69	2	3	0	7.04	2	3	0	0	0	0	0	0	0	0	0	6.45	1	1	3.33333	0.333333	0.1	-3.32193	≥ 0.05	F:RNA binding; F:nucleic acid binding; F:nucleotide binding; C:ribonucleoprotein complex; P:RNA processing; C:nucleus
A0A023FVW2	Uncharacterized protein (Fragment)	Amblyomma parvum PE	192	23.2453	10.5942	1	1	13	18	1.62267	16.67	4	4	0	17.19	5	5	0	0	0	0	1.67036	10.94	2	3	0	0	0	0	1.77357	13.54	3	3	3	2	0.666667	-0.584963	≥ 0.05	-
A0A023FVX0	Malate dehydrogenase (Fragment)	Amblyomma parvum PE	347	37.4923	8.36768	2	1	9	13	0	11.24	3	4	0	0	0	0	0	8.93	3	3	0	7.78	1	2	0	0	0	0	0	0	0	0	2.33333	0.666667	0.285714	-1.80735	≥ 0.05	F:L-malate dehydrogenase activity; P:tricarboxylic acid cycle; P:oxidation-reduction process; P:carbohydrate metabolic process; F:oxidoreductase activity, acting on the CH-OH group of donors, NAD or NADP as acceptor; F:oxidoreductase activity; F:malate dehydrogenase activity; F:catalytic activity; P:carboxylic acid metabolic process; P:malate metabolic process
A0A023FVX1	Putative multidrug resistance-associated protein/mitoxantrone resistance protein abc superfamily	Amblyomma parvum PE	274	30.1348	8.95361	1	1	7	13	0	10.58	2	2	0	0	0	0	0	9.12	2	3	0	0	0	0	1.75805	8.03	2	3	0	14.23	3	3	1.66667	2	1.2	0.263034	≥ 0.05	F:ATPase activity; F:ATP binding; C:integral component of membrane; P:metabolic process; F:ATPase activity, coupled to transmembrane movement of substances; P:transmembrane transport; P:transport
A0A023FVX6	Putative lipocalin-3 1	Amblyomma parvum PE	248	27.5378	8.42627	1	1	7	13	0	20.16	4	4	0	0	0	0	0	8.47	2	2	0	0	0	0	1.69909	13.31	4	4	0	11.69	3	3	2	2.33333	1.16667	0.222392	≥ 0.05	-
A0A023FVY6	Uncharacterized protein (Fragment)	Amblyomma parvum PE	275	31.3501	9.56885	3	1	4	7	0	0	0	0	3.88352	6.18	2	2	2.51945	9.45	2	2	0	0	0	0	0	0	0	0	1.64064	8.36	2	3	1.33333	1	0.75	-0.415037	≥ 0.05	F:nucleic acid binding; F:nucleotide binding
A0A023FVY7	Putative udp-galactose transporter related protein	Amblyomma parvum PE	357	39.3058	9.64209	2	1	3	3	0	9.52	2	2	0	0	0	0	0	0	0	0	0	0	0	0	0	0	0	0	0	0	0	0	0.666667	0	0	#NUM!	≥ 0.05	C:integral component of membrane; C:membrane; P:transmembrane transport
A0A023FVZ4	Putative mitochondrial f1f0-atp synthase subunit g/atp20	Amblyomma parvum PE	96	10.7287	9.83252	4	1	3	6	0	0	0	0	0	15.63	1	1	0	0	0	0	0	0	0	0	0	29.17	2	2	0	0	0	0	0.333333	0.666667	2	1	≥ 0.05	F:hydrogen ion transmembrane transporter activity; P:ATP synthesis coupled proton transport; C:mitochondrial proton-transporting ATP synthase complex, coupling factor F(o)
A0A023FVZ8	Putative 40s ribosomal protein	Amblyomma parvum PE	273	29.8269	10.1694	7	1	19	34	1.32552	28.94	5	5	5.73397	19.78	6	6	8.86485	30.4	8	8	5.39272	16.12	4	4	3.17785	13.19	4	4	2.30692	20.88	3	3	6.33333	3.66667	0.578947	-0.788496	≥ 0.05	F:structural constituent of ribosome; F:RNA binding; P:translation; C:small ribosomal subunit; C:ribonucleoprotein complex; C:ribosome
A0A023FW07	Putative mitochondrial aspartate/glutamate carrier protein (Fragment)	Amblyomma parvum PE	367	39.9891	9.67139	1	1	10	15	0	10.9	3	3	1.90459	11.17	3	3	0	0	0	0	3.90725	7.9	4	4	0	0	0	0	2.12309	10.9	3	3	2	2.33333	1.16667	0.222392	≥ 0.05	C:integral component of membrane; C:membrane; P:transmembrane transport; P:transport
A0A023FW10	Putative cdc2-related protein kinase	Amblyomma parvum PE	369	41.7377	6.87354	3	3	11	20	2.09758	11.38	3	3	0	5.42	2	2	3.4694	15.18	5	6	0	10.57	4	4	1.73297	9.76	3	3	0	5.42	2	2	3.66667	3	0.818182	-0.289507	≥ 0.05	F:kinase activity; F:ATP binding; F:protein kinase activity; P:phosphorylation; F:nucleotide binding; P:protein phosphorylation
A0A023FW12	Putative transcriptional coactivator caper rrm superfamily	Amblyomma parvum PE	279	31.8848	12.1909	5	1	10	15	1.6172	10.75	3	3	2.53299	8.24	2	2	1.63748	13.26	3	3	0	0	0	0	1.74788	17.56	4	4	0	0	0	0	2.66667	1.33333	0.5	-1	≥ 0.05	F:nucleic acid binding; F:nucleotide binding
A0A023FW14	Putative nocturnin	Amblyomma parvum PE	370	41.9469	5.36377	3	3	12	32	3.89662	6.22	3	5	4.40803	10.27	4	4	2.25456	16.22	4	4	1.68788	6.76	2	2	2.16178	5.14	2	3	3.54873	7.03	4	5	4.33333	3.33333	0.769231	-0.378512	≥ 0.05	-
A0A023FW29	Putative actin	Amblyomma parvum PE	376	42.553	7.00537	4	6	13	25	2.5636	5.59	2	2	3.25386	9.84	3	3	5.23786	4.26	1	3	0	16.76	4	4	5.45926	18.62	5	5	3.64806	11.17	2	2	2.66667	3.66667	1.375	0.459432	≥ 0.05	F:ATP binding; C:dynactin complex; F:nucleotide binding
A0A023FW36	Putative receptor-mediated endocytosis (Fragment)	Amblyomma parvum PE	289	32.3286	8.88037	1	6	16	34	2.11722	11.42	2	2	2.27066	14.53	4	4	0	19.03	6	6	1.76345	26.99	6	6	2.04375	21.11	5	6	0	22.15	5	7	4	6.33333	1.58333	0.662965	≥ 0.05	-
A0A023FW39	Putative polya binding protein (Fragment)	Amblyomma parvum PE	381	41.6925	5.26221	1	3	8	9	0	0	0	0	0	0	0	0	0	5.51	2	3	0	7.35	2	2	0	0	0	0	1.61852	17.06	4	4	1	2	2	1	≥ 0.05	F:RNA binding
A0A023FW41	Putative cyclin b	Amblyomma parvum PE	384	43.0693	9.46631	1	2	11	14	0	0	0	0	0	0	0	0	0	16.67	5	5	0	0	0	0	2.09071	9.38	3	3	0	14.32	5	6	1.66667	3	1.8	0.847997	≥ 0.05	C:nucleus
A0A023FW43	Putative ccr4-not transcription complex ixodes scapularis ccr4-not transcription complex	Amblyomma parvum PE	390	43.257	6.85889	1	1	7	22	3.45887	12.56	4	5	0	0	0	0	1.79501	11.03	3	3	1.97443	6.67	3	3	1.96837	2.05	1	1	1.91643	6.67	3	4	2.66667	2.66667	1	0	≥ 0.05	-
A0A023FW44	Putative isocitrate dehydrogenase gamma subunit (Fragment)	Amblyomma parvum PE	391	42.9172	8.1333	2	3	8	24	1.66766	3.58	1	1	5.5647	4.6	2	4	1.71041	13.55	4	5	1.85696	10.74	3	5	3.33248	7.93	2	3	2.15372	13.3	3	3	3.33333	3.66667	1.1	0.137504	≥ 0.05	F:NAD binding; C:mitochondrion; P:tricarboxylic acid cycle; P:oxidation-reduction process; F:isocitrate dehydrogenase (NAD+) activity; F:oxidoreductase activity, acting on the CH-OH group of donors, NAD or NADP as acceptor; F:oxidoreductase activity; F:metal ion binding; F:magnesium ion binding
A0A023FW45	Putative u3 small nucleolar ribonucleoprotein snornp component	Amblyomma parvum PE	288	33.8063	8.88037	1	1	6	8	0	0	0	0	0	4.86	1	1	0	11.46	4	4	0	0	0	0	0	0	0	0	0	9.38	2	3	1.66667	1	0.6	-0.736966	≥ 0.05	C:viral nucleocapsid; C:ribonucleoprotein complex
A0A023FW54	Putative gtp-binding protein (Fragment)	Amblyomma parvum PE	296	34.3655	6.99072	5	1	3	3	0	0	0	0	0	0	0	0	0	11.82	3	3	0	0	0	0	0	0	0	0	0	0	0	0	1	0	0	#NUM!	≥ 0.05	F:GTP binding
A0A023FW60	Putative alpha/beta hydrolase ixodes scapularis alpha/beta hydrolase	Amblyomma parvum PE	291	32.5202	5.88428	2	2	6	9	0	9.62	3	3	0	0	0	0	1.99662	12.37	3	3	0	4.47	1	1	0	0	0	0	0	0	0	0	2	0.333333	0.166667	-2.58496	≥ 0.05	F:hydrolase activity; P:metabolic process
A0A023FW64	Putative f0f1-type atp synthase gamma subunit	Amblyomma parvum PE	293	32.3948	9.02686	1	1	16	28	0	21.84	4	4	1.90979	5.8	2	2	1.62221	34.13	7	7	1.83843	8.19	2	2	1.93771	20.48	4	5	0	24.91	5	7	4.33333	4.66667	1.07692	0.106915	≥ 0.05	P:ATP synthesis coupled proton transport; C:proton-transporting ATP synthase complex, catalytic core F(1); F:proton-transporting ATPase activity, rotational mechanism; F:proton-transporting ATP synthase activity, rotational mechanism
A0A023FW70	Putative aquaporin major intrinsic protein family	Amblyomma parvum PE	302	32.6181	6.29053	3	1	3	4	0	4.97	1	1	0	0	0	0	0	0	0	0	0	0	0	0	0	15.23	2	3	0	0	0	0	0.333333	1	3	1.58496	≥ 0.05	C:integral component of membrane; C:membrane; P:transport; F:transporter activity
A0A023FW79	Uncharacterized protein	Amblyomma parvum PE	113	12.7712	4.64014	1	1	2	3	1.72491	8.85	1	1	1.78015	25.66	2	2	0	0	0	0	0	0	0	0	0	0	0	0	0	0	0	0	1	0	0	#NUM!	≥ 0.05	P:transcription, DNA-templated
A0A023FW81	Putative glycosyltransferase (Fragment)	Amblyomma parvum PE	413	46.6747	8.04541	1	6	12	43	1.79024	12.59	4	5	8.33246	13.56	3	6	4.06926	13.8	3	7	10.3682	12.83	3	7	4.1875	15.01	4	4	4.39908	17.92	5	8	6	6.33333	1.05556	0.0780025	≥ 0.05	P:biosynthetic process; F:transferase activity
A0A023FW85	Putative 26s proteasome regulatory complex subunit (Fragment)	Amblyomma parvum PE	418	46.9906	6.88818	3	1	17	30	0	9.33	2	2	0	18.66	5	5	0	14.59	5	5	0	16.27	4	6	1.7303	18.42	6	8	0	0	0	0	4	4.66667	1.16667	0.222392	≥ 0.05	C:proteasome complex
A0A023FW87	Putative inward rectifier k+ channel ixodes scapularis inward rectifier k+ channel (Fragment)	Amblyomma parvum PE	299	34.5696	6.52197	1	1	3	6	0	0	0	0	0	4.68	1	1	1.64721	8.03	2	2	0	7.36	2	2	0	0	0	0	0	4.68	1	1	1	1	1	0	≥ 0.05	F:voltage-gated ion channel activity; C:integral component of membrane; P:potassium ion transmembrane transport; F:inward rectifier potassium channel activity; C:membrane; P:potassium ion transport; P:ion transport; P:transport; P:regulation of ion transmembrane transport
A0A023FW91	Putative proteasome inhibitor ixodes scapularis proteasome inhibitor	Amblyomma parvum PE	301	32.8885	7.48877	1	1	6	11	0	0	0	0	0	0	0	0	0	18.94	3	3	2.09206	6.64	1	3	2.05557	18.94	3	3	0	10.3	2	2	1	2.66667	2.66667	1.41504	≥ 0.05	C:proteasome complex
A0A023FW97	Putative villin headpiece vhp domain-containing protein (Fragment)	Amblyomma parvum PE	120	13.2276	5.30029	1	2	3	6	3.40811	20	2	3	0	0	0	0	0	0	0	0	0	23.33	2	3	0	0	0	0	0	0	0	0	1	1	1	0	≥ 0.05	-
A0A023FW99	Putative interferon-related protein pc4	Amblyomma parvum PE	430	46.8918	6.46826	2	1	9	12	0	8.84	3	3	0	0	0	0	0	0	0	0	0	6.05	2	3	0	8.84	5	5	1.71121	2.56	1	1	1	3	3	1.58496	≥ 0.05	-
A0A023FWA6	Histone H2B	Amblyomma parvum PE	124	13.8536	10.521	4	1	12	32	7.80905	37.1	5	6	5.76834	29.84	4	5	4.17575	21.77	3	4	2.06082	13.71	2	2	3.7465	23.39	3	3	2.00131	37.1	5	5	5	3.33333	0.666667	-0.584963	≥ 0.05	C:chromosome; C:nucleosome; F:protein heterodimerization activity; C:nucleus; F:DNA binding
A0A023FWA7	Putative adaptor protein pacsin (Fragment)	Amblyomma parvum PE	435	49.414	6.25244	1	5	13	18	0	0	0	0	0	0	0	0	0	6.67	2	2	1.65318	10.34	5	6	2.16429	11.03	3	3	0	11.26	4	4	0.666667	4.33333	6.5	2.70044	≥ 0.05	-
A0A023FWB0	Putative methionine aminopeptidase 2	Amblyomma parvum PE	124	14.1241	8.17725	1	1	5	5	0	0	0	0	0	0	0	0	0	0	0	0	0	20.97	2	2	0	0	0	0	0	13.71	1	1	0	1	#DIV/0!	#DIV/0!	≥ 0.05	P:proteolysis; F:aminopeptidase activity
A0A023FWB9	Uncharacterized protein (Fragment)	Amblyomma parvum PE	126	14.44	4.29736	1	1	3	4	1.70973	16.67	3	3	0	0	0	0	0	0	0	0	0	0	0	0	0	7.94	1	1	0	0	0	0	1	0.333333	0.333333	-1.58496	≥ 0.05	F:unfolded protein binding; P:protein folding; C:prefoldin complex
A0A023FWD4	Putative tick til 23 (Fragment)	Amblyomma parvum PE	320	35.5612	9.17334	1	5	15	26	2.02242	32.5	6	11	0	0	0	0	0	0	0	0	1.77833	10.31	4	4	0	12.81	2	2	0	18.44	4	6	3.66667	4	1.09091	0.125531	≥ 0.05	-
A0A023FWD6	Putative cleavage/polyadenylation factor	Amblyomma parvum PE	315	35.0446	6.59521	1	1	6	6	0	11.75	2	2	0	0	0	0	0	12.06	2	2	0	0	0	0	0	0	0	0	0	0	0	0	1.33333	0	0	#NUM!	≥ 0.05	-
A0A023FWE3	Putative gdp dissociation inhibitor (Fragment)	Amblyomma parvum PE	449	50.3404	6.48096	1	2	21	56	11.2788	17.37	7	7	6.72422	16.04	8	9	1.7	9.8	4	4	11.3226	16.93	6	7	3.846	20.71	10	10	12.8005	20.94	8	9	6.66667	8.66667	1.3	0.378512	≥ 0.05	P:regulation of catalytic activity; F:Rab GDP-dissociation inhibitor activity; P:protein transport
A0A023FWE6	Catalase (Fragment)	Amblyomma parvum PE	453	51.9568	8.104	2	1	9	14	0	0	0	0	1.7297	5.74	2	3	0	0	0	0	0	11.92	5	5	0	6.18	2	2	0	8.39	3	4	1	3.66667	3.66667	1.87447	≥ 0.05	F:metal ion binding; P:oxidation-reduction process; F:heme binding; F:oxidoreductase activity; F:catalase activity; P:hydrogen peroxide catabolic process; P:response to oxidative stress; F:peroxidase activity
A0A023FWE8	Putative conserved plasma membrane protein	Amblyomma parvum PE	316	35.1164	8.96826	1	2	5	20	0	5.38	2	3	0	0	0	0	3.45537	12.66	4	8	0	7.91	3	5	1.61134	13.29	3	4	0	0	0	0	3.66667	3	0.818182	-0.289507	≥ 0.05	-
A0A023FWF1	Putative ubiquinol cytochrome c reductase subunit qcr2	Amblyomma parvum PE	456	48.6464	8.73389	3	2	11	38	1.62875	9.87	4	5	0	7.24	3	3	4.3257	18.2	7	7	1.73582	8.11	3	5	1.83731	2.63	1	1	2.0221	16.01	6	6	5	4	0.8	-0.321928	≥ 0.05	F:metal ion binding; P:metabolic process; F:catalytic activity
A0A023FWF5	Histone H2A	Amblyomma parvum PE	139	14.6761	10.7407	3	1	11	35	8.27621	20.86	5	7	13.5425	24.46	5	7	4.97065	25.9	4	6	0	0	0	0	2.30685	25.9	2	3	4.60146	16.55	4	4	6.66667	2.33333	0.35	-1.51457	≥ 0.05	C:chromosome; C:nucleosome; F:protein heterodimerization activity; C:nucleus; F:DNA binding
A0A023FWG2	Putative t-complex protein 1 subunit zeta danio rerio chaperonin (Fragment)	Amblyomma parvum PE	460	50.2476	6.48096	1	1	11	23	4.11853	10	3	3	0	0	0	0	4.39391	8.04	2	4	2.52186	10.43	4	4	0	7.61	4	5	0	0	0	0	2.33333	3	1.28571	0.36257	≥ 0.05	F:unfolded protein binding; F:ATP binding; P:protein folding; F:nucleotide binding
A0A023FWG7	Putative splicing factor u2af large subunit rrm superfamily	Amblyomma parvum PE	464	51.1178	8.90967	5	2	6	6	0	7.54	2	2	2.33831	6.25	2	2	0	0	0	0	0	0	0	0	0	0	0	0	0	0	0	0	1.33333	0	0	#NUM!	≥ 0.05	F:RNA binding; F:nucleic acid binding; F:nucleotide binding; P:mRNA processing; C:nucleus
A0A023FWH1	Putative rna-binding protein nob1p involved in 26s proteasome assembly (Fragment)	Amblyomma parvum PE	324	35.2692	7.38623	1	2	8	9	0	0	0	0	0	14.51	4	4	0	0	0	0	0	19.75	5	5	0	0	0	0	0	0	0	0	1.33333	1.66667	1.25	0.321928	≥ 0.05	C:proteasome complex
A0A023FWH5	Putative 26s proteasome regulatory complex subunit rpn8/psmd7 (Fragment)	Amblyomma parvum PE	320	36.2879	6.37939	3	2	5	7	0	0	0	0	3.81152	16.56	3	3	0	0	0	0	2.19343	9.38	2	2	0	0	0	0	2.78565	4.38	2	2	1	1.33333	1.33333	0.415037	≥ 0.05	C:proteasome complex
A0A023FWI0	Putative serine/threonine protein kinase (Fragment)	Amblyomma parvum PE	322	37.2202	8.90967	1	3	11	21	0	2.8	1	1	0	12.42	3	3	0	0	0	0	1.34741	29.19	7	8	4.46037	15.53	5	5	0	0	0	0	1.33333	4.33333	3.25	1.70044	≥ 0.05	F:kinase activity; F:ATP binding; F:protein kinase activity; P:phosphorylation; P:cell cycle; F:nucleotide binding; P:protein phosphorylation; F:protein serine/threonine kinase activity
A0A023FWJ0	Putative muscle myosin heavy chain ixodes scapularis muscle myosin heavy chain (Fragment)	Amblyomma parvum PE	476	51.2388	5.77002	2	1	11	29	1.68343	8.19	3	3	3.216	15.34	8	9	3.17247	4.62	2	3	5.01988	1.89	2	4	3.1714	9.66	4	5	1.56275	4.2	3	3	5	4	0.8	-0.321928	≥ 0.05	-
A0A023FWJ4	Putative calpain-like thiol protease family (Fragment)	Amblyomma parvum PE	479	54.2559	5.26221	2	4	10	14	0	8.98	4	5	0	0	0	0	0	8.98	4	4	2.05773	13.57	3	3	0	5.64	2	2	0	0	0	0	3	1.66667	0.555556	-0.847997	≥ 0.05	P:proteolysis; F:hydrolase activity; F:cysteine-type peptidase activity; F:peptidase activity; F:calcium-dependent cysteine-type endopeptidase activity; C:intracellular
A0A023FWJ7	Putative conserved membrane protein	Amblyomma parvum PE	488	56.1448	7.18115	4	1	2	3	0	0	0	0	2.10995	3.69	2	2	0	0	0	0	1.80915	2.05	1	1	0	0	0	0	0	0	0	0	0.666667	0.333333	0.5	-1	≥ 0.05	P:proteolysis; C:membrane; F:peptidase activity; F:metalloendopeptidase activity; P:CAAX-box protein processing
A0A023FWJ8	Putative heteroproteinous nuclear ribonucleoprotein at 87f	Amblyomma parvum PE	332	34.9149	8.03076	6	1	16	90	22.1712	21.99	9	14	34.2052	18.98	9	15	25.811	23.49	9	13	12.9601	20.78	6	8	21.8323	25.6	9	11	30.5235	28.92	9	12	14	10.3333	0.738095	-0.438121	≥ 0.05	F:nucleic acid binding; C:viral nucleocapsid; F:nucleotide binding; C:ribonucleoprotein complex
A0A023FWK0	Putative ribosomal protein l24	Amblyomma parvum PE	134	15.8305	10.8579	1	1	7	10	0	0	0	0	4.5526	31.34	4	4	1.7313	37.31	3	3	0	0	0	0	0	0	0	0	0	0	0	0	2.33333	0	0	#NUM!	≥ 0.05	C:ribosome
A0A023FWK2	Putative prp19	Amblyomma parvum PE	495	53.4826	6.99072	2	1	8	16	0	11.11	4	4	0	5.25	2	3	0	0	0	0	0	5.66	2	3	0	0	0	0	0	9.09	3	4	2.33333	2.33333	1	0	≥ 0.05	F:ligase activity; P:protein ubiquitination; F:ubiquitin-protein transferase activity
A0A023FWK7	Putative udp-n-acetylglucosamine transporter	Amblyomma parvum PE	328	36.3178	9.31982	1	2	3	4	0	12.8	2	2	0	12.2	2	2	0	0	0	0	0	0	0	0	0	0	0	0	0	0	0	0	1.33333	0	0	#NUM!	≥ 0.05	C:integral component of membrane; C:membrane; P:transmembrane transport
A0A023FWK9	Putative vacuolar protein	Amblyomma parvum PE	336	37.7612	6.30322	1	5	7	22	2.28739	11.31	3	4	0	0	0	0	6.6601	8.04	1	4	2.06676	8.04	1	2	0	8.04	1	1	2.19899	16.37	3	5	2.66667	2.66667	1	0	≥ 0.05	-
A0A023FWL1	Putative conserved membrane protein	Amblyomma parvum PE	330	37.3587	9.90576	1	1	4	7	0	0	0	0	0	0	0	0	0	0	0	0	0	13.64	3	5	0	0	0	0	0	0	0	0	0	1.66667	#DIV/0!	#DIV/0!	≥ 0.05	-
A0A023FWL3	Putative tick metalloprotease 1	Amblyomma parvum PE	500	57.0036	6.91748	1	1	4	6	0	7.4	3	4	0	0	0	0	0	0	0	0	0	0	0	0	0	0	0	0	0	0	0	0	1.33333	0	0	#NUM!	≥ 0.05	P:proteolysis; F:metallopeptidase activity; F:peptidase activity; F:metalloendopeptidase activity
A0A023FWL9	Glucose-6-phosphate 1-dehydrogenase (Fragment)	Amblyomma parvum PE	506	57.41	8.77783	2	1	9	12	0	0	0	0	2.06898	4.55	1	2	0	9.09	4	4	0	4.55	1	1	1.90539	6.72	3	3	1.75977	4.35	2	2	2	2	1	0	≥ 0.05	P:oxidation-reduction process; P:glucose metabolic process; F:oxidoreductase activity; F:glucose-6-phosphate dehydrogenase activity; P:carbohydrate metabolic process; P:pentose-phosphate shunt; F:NADP binding
A0A023FWM8	Putative glyceraldehyde 3-phosphate dehydrogenase	Amblyomma parvum PE	333	35.8293	8.11865	2	1	15	34	5.5192	21.32	4	5	3.15803	8.41	3	5	8.72802	19.52	4	6	2.9309	8.11	2	2	4.83577	20.42	4	6	2.78211	18.02	4	4	5.33333	4	0.75	-0.415037	≥ 0.05	P:oxidation-reduction process; P:glucose metabolic process; F:oxidoreductase activity; F:oxidoreductase activity, acting on the aldehyde or oxo group of donors, NAD or NADP as acceptor; P:glycolytic process; F:glyceraldehyde-3-phosphate dehydrogenase (NAD+) (phosphorylating) activity; F:NAD binding; F:NADP binding
A0A023FWN3	Putative electron transfer flavoprotein alpha subunit	Amblyomma parvum PE	340	35.4296	8.27979	1	2	18	62	13.9476	21.18	7	8	14.4382	27.35	8	9	11.1281	18.53	5	5	9.2804	27.94	7	8	7.28989	22.35	5	8	11.1223	19.12	7	8	7.33333	8	1.09091	0.125531	≥ 0.05	F:electron carrier activity; F:flavin adenine dinucleotide binding
A0A023FWP2	Putative leucine aminopeptidase	Amblyomma parvum PE	525	56.1611	7.86963	2	1	16	20	0	7.05	2	2	2.91799	7.81	4	4	0	0	0	0	3.20848	9.14	4	6	0	0	0	0	0	15.43	5	5	2	3.66667	1.83333	0.874469	≥ 0.05	P:proteolysis; C:cytoplasm; P:protein metabolic process; F:metalloexopeptidase activity; F:aminopeptidase activity; F:manganese ion binding; C:intracellular
A0A023FWP3	Uracil-DNA glycosylase (Fragment)	Amblyomma parvum PE	158	17.4522	9.59814	1	1	3	10	0	0	0	0	1.82418	12.03	2	2	0	0	0	0	1.87871	11.39	1	1	1.85772	12.03	2	2	4.22914	11.39	1	2	0.666667	1.66667	2.5	1.32193	≥ 0.05	P:base-excision repair; P:cellular response to DNA damage stimulus; P:DNA repair; F:hydrolase activity, hydrolyzing N-glycosyl compounds; F:hydrolase activity; P:metabolic process; F:hydrolase activity, acting on glycosyl bonds; F:uracil DNA N-glycosylase activity
A0A023FWP6	Putative low-density lipoprotein receptor (Fragment)	Amblyomma parvum PE	531	58.7005	5.5415	1	4	11	14	0	0	0	0	1.64734	4.33	2	3	0	0	0	0	0	7.91	4	4	0	12.99	4	4	0	12.62	3	3	1	3.66667	3.66667	1.87447	≥ 0.05	F:calcium ion binding
A0A023FWQ5	Malate dehydrogenase	Amblyomma parvum PE	340	35.823	9.1001	3	1	15	54	15.6533	29.12	8	9	16.3421	30.29	8	9	8.47649	21.76	6	9	13.1175	28.82	8	10	8.62494	24.41	7	7	11.5988	15.59	4	4	9	7	0.777778	-0.36257	≥ 0.05	F:L-malate dehydrogenase activity; P:tricarboxylic acid cycle; P:oxidation-reduction process; P:carbohydrate metabolic process; F:oxidoreductase activity, acting on the CH-OH group of donors, NAD or NADP as acceptor; F:oxidoreductase activity; F:malate dehydrogenase activity; F:catalytic activity; P:carboxylic acid metabolic process; P:malate metabolic process
A0A023FWQ6	Putative chaperonin subunit ixodes scapularis chaperonin subunit	Amblyomma parvum PE	541	59.0438	5.73193	2	1	28	57	9.52861	29.57	10	12	4.53193	19.78	6	7	6.03817	35.12	11	11	0	14.05	4	7	9.87586	17.93	7	8	3.94066	13.49	6	6	10	7	0.7	-0.514573	≥ 0.05	F:unfolded protein binding; F:ATP binding; C:cytoplasm; P:protein folding; F:nucleotide binding
A0A023FWR0	Putative f-box/wd repeat-containing protein 4 (Fragment)	Amblyomma parvum PE	339	38.2421	8.42627	1	2	5	8	0	0	0	0	0	0	0	0	0	0	0	0	2.05228	7.08	2	2	0	18.29	5	5	0	2.65	1	1	0	2.66667	#DIV/0!	#DIV/0!	≥ 0.05	-
[truncated: 12,803 more rows]

## Sheet: Column description
Column description
Accession	Identifier for the protein (Uniprot accession)
[truncated: 19 more rows]
